# Supplementary material for: Controllable cyclization of alkynyl thioethersviaBrønsted acid-catalyzed dearomatization
Source: Royal Society of Chemistry journal article supplement (doi:10.1039/d3qo00489a), 2023-01-01

Supporting Information

**Controllable cyclization of alkynyl thioethers via Brønsted acid-catalyzed dearomatization**

*Xin-Yang Fan,<sup>‡a</sup> Xin Liu,<sup>‡a</sup> Yin-Zhu Kong,<sup>a</sup> Bo-Han Zhu,<sup>b</sup> Jian Lin,<sup>a</sup> Peng-Cheng Qian,<sup>\*b</sup> Bo Zhou<sup>a</sup> and Long-Wu Ye<sup>\*a,c,d</sup>*

<sup>a</sup> *Key Laboratory for Chemical Biology of Fujian Province and State Key Laboratory of Physical Chemistry of Solid Surfaces, College of Chemistry and Chemical Engineering, Xiamen University, Xiamen 361005, China.*

*E-mail: [longwuye@xmu.edu.cn](mailto:longwuye@xmu.edu.cn)*

<sup>b</sup> *Institute of New Materials & Industry Technology, College of Chemistry & Materials Engineering, Wenzhou University, Wenzhou 325035, China.*

*E-mail: [qpc@wzu.edu.cn](mailto:qpc@wzu.edu.cn)*

<sup>c</sup> *State Key Laboratory of Elemento-Organic Chemistry, Nankai University, Tianjin 300071, China.*

<sup>d</sup> *State Key Laboratory of Organometallic Chemistry, Shanghai Institute of Organic Chemistry, Chinese Academy of Sciences, Shanghai 200032, China.*

| <b>Content</b>                                   | <b>Page Number</b> |
|--------------------------------------------------|--------------------|
| <b>1. General Information</b>                    | 2                  |
| <b>2. Preparation of Starting Materials</b>      | 3                  |
| <b>3. General Procedures and Transformations</b> | 12                 |
| <b>4. Crystal Data</b>                           | 36                 |
| <b>5. HPLC Chromatograms</b>                     | 39                 |
| <b>6. NMR Spectra</b>                            | 40                 |

## 1. General Information

Ethyl acetate (ACS grade), hexanes (ACS grade), anhydrous 1,2-dichloroethane (ACS grade) and toluene (ACS grade) were obtained commercially and used without further purification. Methylene chloride and tetrahydrofuran were purified according to standard methods unless otherwise noted. Commercially available reagents were used without further purification. Reactions were monitored by thin layer chromatography (TLC) using silicycle pre-coated silica gel plates. Flash column chromatography was performed over silica gel (300-400 mesh). Infrared spectra were recorded on a Nicolet AVATER FTIR330 spectrometer as thin film and are reported in reciprocal centimeter ( $\text{cm}^{-1}$ ). Mass spectra were recorded with Micromass QTOF2 Quadrupole/Time-of-Flight Tandem mass spectrometer using electron spray ionization.

$^1\text{H}$  NMR spectra were recorded on a Bruker AV-400 spectrometer and a Bruker AV-500 spectrometer in chloroform- $\text{d}_3$ . Chemical shifts are reported in ppm with the internal TMS signal at 0.0 ppm as a standard. The data is being reported as (s = singlet, d = doublet, t = triplet, m = multiplet or unresolved, brs = broad singlet, coupling constant(s) in Hz, integration).

$^{13}\text{C}$  NMR spectra were recorded on a Bruker AV-400 spectrometer and a Bruker AV-500 spectrometer in chloroform- $\text{d}_3$ . Chemical shifts are reported in ppm with the internal chloroform signal at 77.0 ppm as a standard.

## 2. Preparation of Starting Materials

Alkynyl thioethers **1a–1o** were prepared according to the following procedure.<sup>1,2</sup>

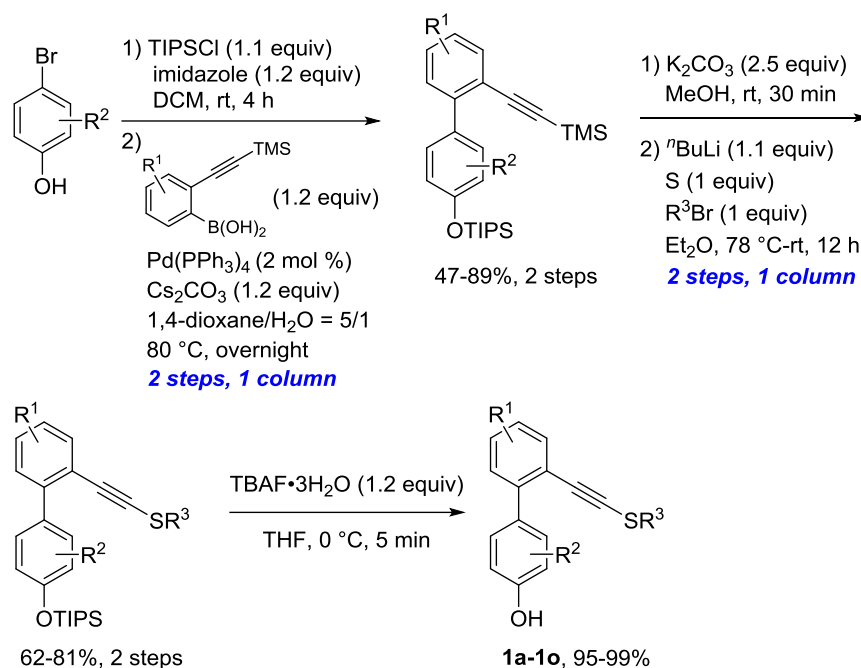

To a solution of 4-bromo-1-phenol derivative (2.0 mmol) and imidazole (2.4 mmol, 0.18 g) in DCM (10 mL) was added TIPSCl (2.2 mmol, 0.43 g) at room temperature. The resulting mixture was stirred at room temperature for 4 h, and the progress of the reaction was monitored by TLC. Upon completion, the solution was filtered through a pad of silica gel and concentrated under reduced pressure. The crude product was directly used in the next step without further purification. After dissolving above crude product in 1,4-dioxane (15 mL) and  $\text{H}_2\text{O}$  (3 mL), (2-((trimethylsilyl)ethynyl)aryl)boronic acid (2.4 mmol),  $\text{Cs}_2\text{CO}_3$  (2.4 mmol, 0.78 g) and  $\text{Pd}(\text{PPh}_3)_4$  (0.04 mmol, 46 mg) were sequentially added at room temperature under  $\text{N}_2$  atmosphere. The reaction mixture was stirred at 80 °C overnight, and the progress of the reaction was monitored by TLC. Upon completion, the reaction was filtered, extracted with ethyl acetate for 3 times, dried over  $\text{MgSO}_4$  and concentrated under vacuum. The residue was purified by chromatography on silica gel (eluent: hexanes/ethyl acetate) to give the trimethyl(biarylethynyl)silane (47–89%, 2 steps). The above trimethyl(biarylethynyl)silane (1.0 mmol) was dissolved in MeOH (5 mL), and  $\text{K}_2\text{CO}_3$  (2.5 mmol, 0.35 g) was added in one portion. The mixture was stirred at

room temperature for 30 min. Upon completion, the mixture was filtered through a pad of silica gel and the filtrate was concentrated under vacuum. The crude product was directly used in the next step without further purification. The obtained crude product was dissolved in dry THF (5.0 mL), and *n*BuLi (2.5 M in hexane, 1.2 mmol) was added dropwise at -78 °C under N<sub>2</sub> atmosphere. After stirring at this temperature for 0.5 h, sulfur powder (1.0 mmol, 32 mg) was added and the mixture was stirred at -78 °C for another 1 h. Then corresponding organobromide (1.0 mmol) was added dropwise at 0 °C, and the reaction mixture was stirred room temperature for additional 12 h. The progress of the reaction was monitored by TLC. Upon completion, the reaction was quenched with saturated aqueous NH<sub>4</sub>Cl and extracted with ethyl acetate for 3 times. The organic layer was dried over MgSO<sub>4</sub>, concentrated and purified by chromatography on silica gel (eluent: hexanes/ethyl acetate) to afford the alkynyl thioether product (62–81%, 2 steps).

To a solution of above alkynyl thioether (0.2 mmol) in THF (2 mL) was added TBAF·3H<sub>2</sub>O (0.24 mmol, 76 mg in 2 mL THF) dropwise at 0 °C. After stirring for 5 min, the reaction was quenched by saturated aqueous NH<sub>4</sub>Cl and extracted with ethyl acetate for 3 times. The organic layer was dried over MgSO<sub>4</sub>, concentrated and purified by chromatography on silica gel (eluent: hexanes/ethyl acetate) to afford the desired alkynyl thioether **1a–1o** (95–99%).

### 2'-((benzylthio)ethynyl)-[1,1'-biphenyl]-4-ol (**1a**)

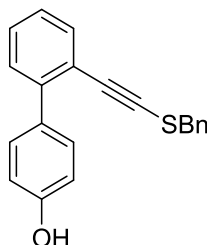

**1a**

Compound **1a** was prepared in 65% yield (246.5 mg) over 5 steps as a pale yellow oil. <sup>1</sup>H NMR (400 MHz, CDCl<sub>3</sub>) δ 7.43 – 7.40 (m, 3H), 7.32 – 7.30 (m, 2H), 7.29 – 7.26 (m, 3H), 7.24 – 7.20 (m, 3H), 6.86 – 6.82 (m, 2H), 5.09 (s, 1H), 3.89 (s, 2H); <sup>13</sup>C NMR (100 MHz, CDCl<sub>3</sub>) δ 155.2, 142.9, 136.8, 133.1, 132.7, 130.5, 129.3, 128.9, 128.5,

128.1, 127.6, 126.6, 121.6, 114.8, 94.4, 81.8, 40.3; IR (neat): 3113(bs), 2164(s), 1653, 1616, 1405, 1117, 963, 739; HRESIMS Calcd for  $[C_{21}H_{16}NaOS]^+$  ( $M + Na^+$ ) 339.0814, found 339.0816.

### 2'-((ethylthio)ethynyl)-[1,1'-biphenyl]-4-ol (**1b**)

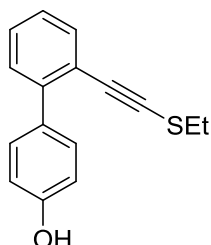

**1b**

Compound **1b** was prepared in 57% yield (180.1 mg) over 5 steps as a yellow oil.  $^1H$  NMR (400 MHz,  $CDCl_3$ )  $\delta$  7.51 – 7.48 (m, 1H), 7.47 – 7.44 (m, 2H), 7.33 – 7.27 (m, 2H), 7.25 – 7.20 (m, 1H), 6.92 – 6.86 (m, 2H), 5.12 (s, 1H), 2.65 (q,  $J = 7.2$  Hz, 2H), 1.26 (t,  $J = 7.2$  Hz, 3H);  $^{13}C$  NMR (100 MHz,  $CDCl_3$ )  $\delta$  155.5, 142.9, 132.9, 132.4, 130.5, 129.2, 127.9, 126.5, 121.8, 115.0, 93.5, 81.9, 29.8, 14.7; IR (neat): 3410(bs), 2162(s), 1612, 1474, 1258, 1172, 834, 760; HRESIMS Calcd for  $[C_{16}H_{14}NaOS]^+$  ( $M + Na^+$ ) 277.0658, found 277.0663.

### 2'-((phenylthio)ethynyl)-[1,1'-biphenyl]-4-ol (**1c**)

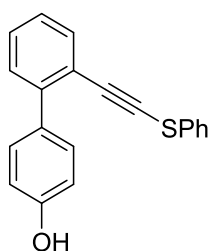

**1c**

Compound **1c** was prepared in 63% yield (199.2 mg) over 5 steps as a pale yellow oil.  $^1H$  NMR (400 MHz,  $CDCl_3$ )  $\delta$  7.56 (d,  $J = 7.6$  Hz, 1H), 7.45 (d,  $J = 8.4$  Hz, 2H), 7.35 – 7.33 (m, 2H), 7.29 – 7.16 (m, 6H), 6.87 (d,  $J = 8.4$  Hz, 2H), 3.90 (brs, 1H);  $^{13}C$  NMR (100 MHz,  $CDCl_3$ )  $\delta$  155.3, 143.2, 133.1, 132.8, 132.5, 130.5, 129.4, 129.1, 128.4, 126.7, 126.3, 126.1, 121.4, 115.1, 98.0, 77.9; IR (neat): 3403(bs), 2228(s), 1635, 1405, 1107, 1080, 883, 739; HRESIMS Calcd for  $[C_{20}H_{14}NaOS]^+$  ( $M + Na^+$ ) 325.0658, found

325.0652.

**2'-((benzylthio)ethynyl)-4'-methyl-[1,1'-biphenyl]-4-ol (1d)**

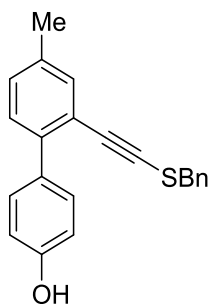

**1d**

Compound **1d** was prepared in 42% yield (132.7 mg) over 5 steps as a pale yellow oil.  $^1\text{H}$  NMR (400 MHz,  $\text{CDCl}_3$ )  $\delta$  7.41 – 7.37 (m, 2H), 7.27 – 7.23 (m, 5H), 7.21 – 7.19 (m, 2H), 7.11 (dd,  $J = 8.0, 1.2$  Hz, 1H), 6.83 – 6.80 (m, 2H), 5.23 (s, 1H), 3.86 (s, 2H), 2.31 (s, 3H);  $^{13}\text{C}$  NMR (100 MHz,  $\text{CDCl}_3$ )  $\delta$  154.9, 140.1, 136.7, 136.2, 133.2, 133.0, 130.4, 129.1, 128.9, 128.5, 127.6, 121.3, 114.8, 94.6, 81.3, 40.3, 20.7; IR (neat): 3309(bs), 2193(s), 1511, 1262, 910, 883, 717, 686; HRESIMS Calcd for  $[\text{C}_{22}\text{H}_{18}\text{NaOS}]^+$  ( $\text{M} + \text{Na}^+$ ) 353.0971, found 353.0973.

**2'-((benzylthio)ethynyl)-5'-methyl-[1,1'-biphenyl]-4-ol (1e)**

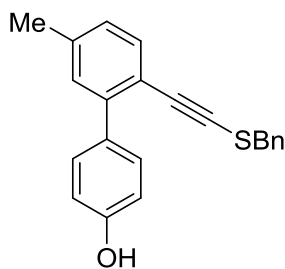

**1e**

Compound **1e** was prepared in 71% yield (224.3 mg) over 5 steps as a pale yellow oil.  $^1\text{H}$  NMR (400 MHz,  $\text{CDCl}_3$ )  $\delta$  7.41 – 7.39 (m, 2H), 7.32 (d,  $J = 8.0$  Hz, 1H), 7.28 – 7.25 (m, 3H), 7.22 – 7.20 (m, 2H), 7.13 (s, 1H), 7.04 (dd,  $J = 8.0, 1.2$  Hz, 1H), 6.84 – 6.81 (m, 2H), 5.05 (s, 1H), 3.87 (s, 2H), 2.36 (s, 3H);  $^{13}\text{C}$  NMR (100 MHz,  $\text{CDCl}_3$ )  $\delta$  155.0, 142.9, 138.3, 136.8, 133.2, 132.8, 130.5, 130.0, 128.9, 128.5, 127.6, 127.4, 118.6, 114.8, 94.5, 80.7, 40.3, 21.4; IR (neat): 3447(bs), 2165(s), 1653, 1455, 1264, 1080, 819,

698; HRESIMS Calcd for  $[C_{22}H_{18}NaOS]^+$  ( $M + Na^+$ ) 353.0971, found 353.0956.

**2'-((benzylthio)ethynyl)-5'-methoxy-[1,1'-biphenyl]-4-ol (1f)**

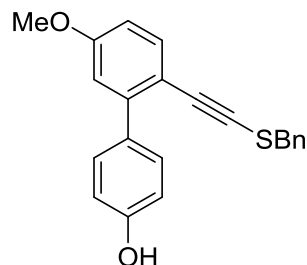

**1f**

Compound **1f** was prepared in 51% yield (161.6 mg) over 5 steps as a pale yellow oil.  $^1H$  NMR (400 MHz,  $CDCl_3$ )  $\delta$  7.39 – 7.34 (m, 3H), 7.25 – 7.18 (m, 5H), 6.84 – 6.80 (m, 3H), 6.75 (dd,  $J = 8.6, 2.6$  Hz, 1H), 5.27 (brs, 1H), 3.83 (s, 2H), 3.78 (s, 3H);  $^{13}C$  NMR (100 MHz,  $CDCl_3$ )  $\delta$  159.5, 155.3, 145.0, 136.9, 134.6, 132.9, 130.4, 128.9, 128.5, 127.5, 114.8, 114.6, 113.9, 112.5, 94.2, 79.6, 55.3, 40.3; IR (neat): 3431(bs), 2160(s), 1600, 1517, 1481, 1221, 1173, 831, 698; HRESIMS Calcd for  $[C_{22}H_{18}NaO_2S]^+$  ( $M + Na^+$ ) 369.0920, found 369.0916.

**2'-((benzylthio)ethynyl)-5'-chloro-[1,1'-biphenyl]-4-ol (1g)**

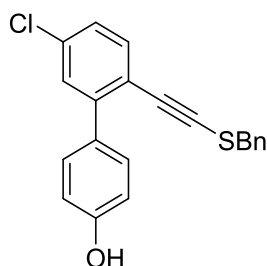

**1g**

Compound **1g** was prepared in 66% yield (208.6 mg) over 5 steps as a pale yellow oil.  $^1H$  NMR (400 MHz,  $CDCl_3$ )  $\delta$  7.40 – 7.38 (m, 2H), 7.33 – 7.27 (m, 5H), 7.20 – 7.17 (m, 3H), 6.85 – 6.82 (m, 2H), 5.12 (s, 1H), 3.87 (s, 2H);  $^{13}C$  NMR (100 MHz,  $CDCl_3$ )  $\delta$  155.5, 144.4, 136.6, 135.3, 133.8, 131.8, 130.4, 129.2, 128.9, 128.5, 127.7, 126.7, 120.1, 115.0, 93.5, 82.9, 40.2; IR (neat): 3439(bs), 2160(s), 1610, 1515, 1237, 1174, 1095, 837; HRESIMS Calcd for  $[C_{21}H_{15}ClNaOS]^+$  ( $M + Na^+$ ) 373.0424, found

373.0438.

**2'-((benzylthio)ethynyl)-5'-fluoro-[1,1'-biphenyl]-4-ol (1h)**

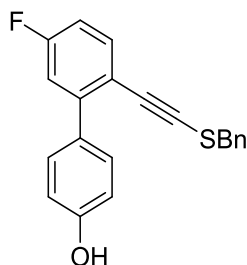

**1h**

Compound **1h** was prepared in 37% yield (116.9 mg) over 5 steps as a colorless oil.  $^1\text{H}$  NMR (400 MHz,  $\text{CDCl}_3$ )  $\delta$  7.37 – 7.33 (m, 3H), 7.25 – 7.20 (m, 3H), 7.19 – 7.16 (m, 2H), 6.98 (dd,  $J = 9.6, 2.8$  Hz, 1H), 6.90 (dd,  $J = 8.4, 2.4$  Hz, 1H), 6.85 (d,  $J = 8.4$  Hz, 2H), 6.32 (brs, 1H), 3.83 (s, 2H);  $^{13}\text{C}$  NMR (100 MHz,  $\text{CDCl}_3$ )  $\delta$  162.1 (d,  $J = 249.0$  Hz), 155.7, 145.4 (d,  $J = 8.0$  Hz), 136.6, 134.7 (d,  $J = 8.0$  Hz), 131.6, 130.4, 128.9, 128.5, 127.6, 117.5 (d,  $J = 3.0$  Hz), 116.0 (d,  $J = 22.0$  Hz), 115.0, 113.7 (d,  $J = 22.0$  Hz), 93.5, 81.2, 40.1;  $^{19}\text{F}$  NMR (376 MHz,  $\text{CDCl}_3$ )  $\delta$  -111.0; IR (neat): 3362(bs), 2167(s), 1701, 1598, 1517, 1259, 1182, 831, 699; HRESIMS Calcd for  $[\text{C}_{21}\text{H}_{15}\text{FNaOS}]^+$  ( $\text{M} + \text{Na}^+$ ) 357.0720, found 357.0716.

**2'-((benzylthio)ethynyl)-5'-methoxy-[1,1'-biphenyl]-4-ol (1i)**

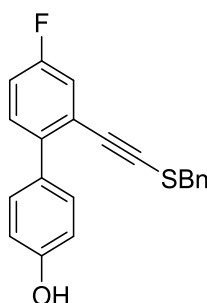

**1i**

Compound **1i** was prepared in 49% yield (155.8 mg) over 5 steps as a pale yellow oil.  $^1\text{H}$  NMR (400 MHz,  $\text{CDCl}_3$ )  $\delta$  7.39 (d,  $J = 8.4$  Hz, 2H), 7.32 – 7.27 (m, 4H), 7.23 – 7.21 (m, 2H), 7.10 (dd,  $J = 9.6, 2.8$  Hz, 1H), 7.05 – 7.01 (m, 1H), 6.87 (d,  $J = 8.4$  Hz, 2H), 4.54 (brs, 1H), 3.91 (s, 2H);  $^{13}\text{C}$  NMR (100 MHz,  $\text{CDCl}_3$ )  $\delta$  161.1 (d,  $J = 246.0$



Hz), 155.5, 139.1 (d,  $J = 3.0$  Hz), 136.5, 132.0, 130.8 (d,  $J = 9.0$  Hz), 130.5, 128.9, 128.6, 127.7, 123.1 (d,  $J = 10.0$  Hz), 118.7 (d,  $J = 23.0$  Hz), 115.3 (d,  $J = 21.0$  Hz), 115.0, 93.6, 83.2, 40.1;  $^{19}\text{F}$  NMR (376 MHz,  $\text{CDCl}_3$ )  $\delta$  -116.5; IR (neat): 3383(bs), 2162(s), 1701, 1406, 1111, 1032, 880, 697; HRESIMS Calcd for  $[\text{C}_{21}\text{H}_{15}\text{FNaOS}]^+$  ( $\text{M} + \text{Na}^+$ ) 357.0720, found 357.0719.

#### 4-(2-((benzylthio)ethynyl)phenyl)-5,6,7,8-tetrahydronaphthalen-1-ol (**1j**)

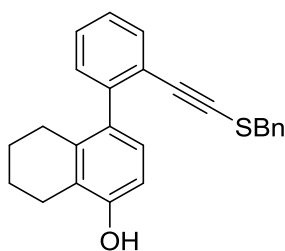

**1j**

Compound **1j** was prepared in 56% yield (177.6 mg) over 5 steps as a yellow oil.  $^1\text{H}$  NMR (400 MHz,  $\text{CDCl}_3$ )  $\delta$  7.39 (dd,  $J = 7.2, 1.2$  Hz, 1H), 7.30 – 7.22 (m, 5H), 7.18 (dd,  $J = 7.2, 1.2$  Hz, 1H), 7.13 – 7.09 (m, 2H), 6.92 (d,  $J = 8.0$  Hz, 1H), 6.68 (d,  $J = 8.0$  Hz, 1H), 4.92 (brs, 1H), 3.71 (s, 2H), 2.71 (t,  $J = 6.4$  Hz, 2H), 2.63 – 2.55 (m, 1H), 2.42 – 2.34 (m, 1H), 1.83 – 1.77 (m, 2H), 1.70 – 1.64 (m, 2H);  $^{13}\text{C}$  NMR (100 MHz,  $\text{CDCl}_3$ )  $\delta$  153.0, 143.8, 137.0, 136.8, 133.4, 131.2, 130.0, 128.7, 128.6, 127.6, 127.5, 126.6, 123.5, 123.0, 111.3, 94.2, 82.1, 40.7, 27.9, 23.2, 22.8, 22.5; IR (neat): 3446(bs), 2162(s), 1652, 1558, 1257, 1057, 771, 699; HRESIMS Calcd for  $[\text{C}_{25}\text{H}_{22}\text{NaOS}]^+$  ( $\text{M} + \text{Na}^+$ ) 393.1284, found 393.1286.

#### 2'-((benzylthio)ethynyl)-2-methyl-[1,1'-biphenyl]-4-ol (**1k**)

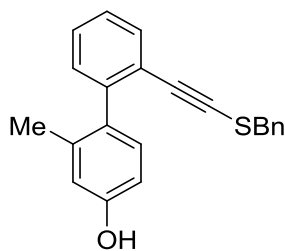

**1k**

Compound **1k** was prepared in 33% yield (124.3 mg) over 5 steps as a pale yellow oil.  $^1\text{H}$  NMR (400 MHz,  $\text{CDCl}_3$ )  $\delta$  7.39 (dd,  $J = 7.6, 1.2$  Hz, 1H), 7.28 – 7.23 (m, 5H), 7.17

(dd,  $J = 7.2, 1.2$  Hz, 1H), 7.13 – 7.11 (m, 2H), 7.06 (d,  $J = 8.4$  Hz, 1H), 6.73 (d,  $J = 2.4$  Hz, 1H), 6.69 (dd,  $J = 8.0, 2.4$  Hz, 1H), 3.72 (s, 2H), 2.11 (s, 3H);  $^{13}\text{C}$  NMR (100 MHz,  $\text{CDCl}_3$ )  $\delta$  154.9, 143.3, 137.9, 136.8, 133.5, 131.4, 131.0, 130.0, 128.8, 128.5, 127.6, 126.7, 123.4, 116.5, 112.2, 94.1, 82.1, 40.6, 20.1; IR (neat): 3369(bs), 2164(s), 1607, 1473, 1236, 1160, 760, 698; HRESIMS Calcd for  $[\text{C}_{22}\text{H}_{18}\text{NaOS}]^+$  ( $\text{M} + \text{Na}^+$ ) 353.0971, found 353.0977.

### 2'-((benzylthio)ethynyl)-2-methoxy-[1,1'-biphenyl]-4-ol (**1l**)

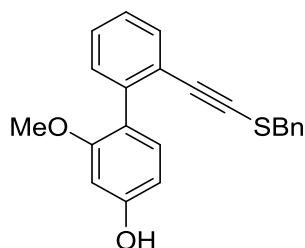

**1l**

Compound **1l** was prepared in 27% yield (105.3 mg) over 5 steps as an orange oil.  $^1\text{H}$  NMR (400 MHz,  $\text{CDCl}_3$ )  $\delta$  7.55 (d,  $J = 7.2$  Hz, 1H), 7.47 (d,  $J = 8.0$  Hz, 1H), 7.42 (dd,  $J = 7.2, 1.2$  Hz, 1H), 7.38 – 7.30 (m, 6H), 7.28 (d,  $J = 1.6$  Hz, 1H), 7.15 (dd,  $J = 8.4, 1.6$  Hz, 1H), 7.07 (d,  $J = 8.0$  Hz, 1H), 5.55 (brs, 1H), 3.97 (s, 2H), 3.94 (s, 3H);  $^{13}\text{C}$  NMR (100 MHz,  $\text{CDCl}_3$ )  $\delta$  145.8, 145.2, 143.1, 136.6, 132.8, 132.5, 129.2, 128.8, 128.4, 128.2, 127.6, 126.5, 122.1, 121.4, 114.0, 112.0, 94.5, 81.9, 55.9, 40.2; IR (neat): 3506(bs), 2162(s), 1519, 1477, 1263, 1205, 760, 698; HRESIMS Calcd for  $[\text{C}_{22}\text{H}_{18}\text{NaO}_2\text{S}]^+$  ( $\text{M} + \text{Na}^+$ ) 369.0920, found 369.0922.

### 2'-((benzylthio)ethynyl)-3-methyl-[1,1'-biphenyl]-4-ol (**1m**)

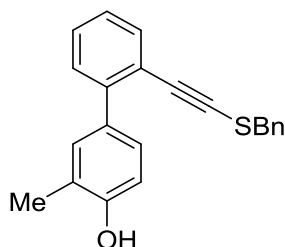

**1m**

Compound **1m** was prepared in 54% yield (170.6 mg) over 5 steps as a pale yellow oil.  $^1\text{H}$  NMR (400 MHz,  $\text{CDCl}_3$ )  $\delta$  7.40 (d,  $J = 7.6$  Hz, 1H), 7.33 – 7.21 (m, 8H), 7.20 –

7.17 (m, 2H), 6.78 (d,  $J = 8.4$  Hz, 1H), 4.04 (brs, 1H), 3.87 (s, 2H), 2.27 (s, 3H);  $^{13}\text{C}$  NMR (100 MHz,  $\text{CDCl}_3$ )  $\delta$  153.5, 143.1, 136.7, 133.0, 132.6, 131.8, 129.2, 128.9, 128.5, 128.1, 128.0, 127.6, 126.4, 123.2, 121.6, 114.4, 94.6, 81.8, 40.3, 15.8; IR (neat): 3415(bs), 2161(s), 1609, 1510, 1474, 1262, 757, 698; HRESIMS Calcd for  $[\text{C}_{22}\text{H}_{18}\text{NaOS}]^+$  ( $\text{M} + \text{Na}^+$ ) 353.0971, found 353.0963.

### 2'-((benzylthio)ethynyl)-3-methoxy-[1,1'-biphenyl]-4-ol (**1n**)

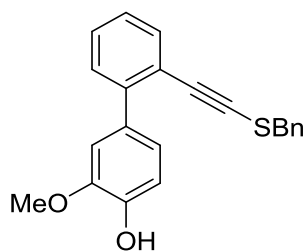

**1n**

Compound **1n** was prepared in 40% yield (124.0 mg) over 5 steps as an orange oil.  $^1\text{H}$  NMR (400 MHz,  $\text{CDCl}_3$ )  $\delta$  7.54 (d,  $J = 7.6$  Hz, 1H), 7.45 (dd,  $J = 7.6, 1.2$  Hz, 1H), 7.42 – 7.38 (m, 1H), 7.36 – 7.33 (m, 3H), 7.31 – 7.27 (m, 3H), 7.26 (d,  $J = 1.6$  Hz, 1H), 7.13 (dd,  $J = 8.0, 2.0$  Hz, 1H), 7.06 (d,  $J = 8.4$  Hz, 1H), 5.42 (brs, 1H), 3.95 (s, 2H), 3.91 (s, 3H);  $^{13}\text{C}$  NMR (100 MHz,  $\text{CDCl}_3$ )  $\delta$  145.8, 145.2, 143.1, 136.6, 132.8, 132.4, 129.2, 128.8, 128.4, 128.2, 127.5, 126.5, 122.1, 121.3, 114.0, 112.0, 94.5, 81.9, 55.8, 40.2; IR (neat): 3510(bs), 2163(s), 1519, 1477, 1262, 1206, 923, 759, 698; HRESIMS Calcd for  $[\text{C}_{22}\text{H}_{18}\text{NaO}_2\text{S}]^+$  ( $\text{M} + \text{Na}^+$ ) 369.0920, found 369.0927.

### 2'-((benzylthio)ethynyl)-3-methoxy-[1,1'-biphenyl]-4-ol (**1o**)

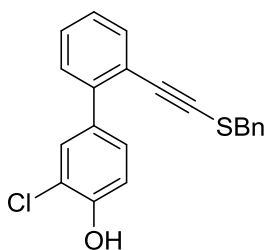

**1o**

Compound **1o** was prepared in 69% yield (218.0 mg) over 5 steps as a pale yellow oil.  $^1\text{H}$  NMR (400 MHz,  $\text{CDCl}_3$ )  $\delta$  7.55 (d,  $J = 2.0$  Hz, 1H), 7.40 (d,  $J = 7.6$  Hz, 1H), 7.32 (dd,  $J = 8.4, 2.0$  Hz, 1H), 7.27 – 7.18 (m, 8H), 7.00 (d,  $J = 8.4$  Hz, 1H), 5.11 (s, 1H),

3.89 (s, 2H);  $^{13}\text{C}$  NMR (100 MHz,  $\text{CDCl}_3$ )  $\delta$  151.3, 141.6, 136.5, 133.6, 132.6, 129.6, 129.3, 129.1, 128.9, 128.5, 128.2, 127.6, 126.9, 121.6, 119.6, 116.0, 94.0, 82.5, 40.3; IR (neat): 3509(bs), 2163(s), 1507, 1472, 1288, 1184, 872, 761, 698; HRESIMS Calcd for  $[\text{C}_{21}\text{H}_{15}\text{ClNaOS}]^+$  ( $\text{M} + \text{Na}^+$ ) 373.0424, found 373.0412.

### 3. General Procedures and Transformations

#### 3.1 General procedure for the synthesis of the phenanthrols **2**

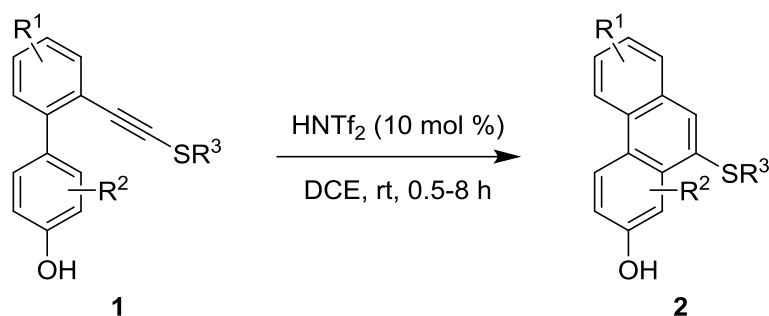

To a dry 4-mL vial were added alkyne thioether **1** (0.1 mmol) and the solution of HNTf<sub>2</sub> in DCE (0.01 M, 0.01 mmol, 1 mL). The resulting mixture was stirred at room temperature and the progress of the reaction was monitored by TLC. Upon completion, the mixture was quenched by Et<sub>3</sub>N (0.012 mmol, 1.7  $\mu\text{L}$ ), concentrated under reduced pressure and the residue was purified by chromatography on silica gel (eluent: hexanes/ethyl acetate) to afford the desired phenanthrol **2**.

#### 10-(benzylthio)phenanthren-2-ol (**2a**)

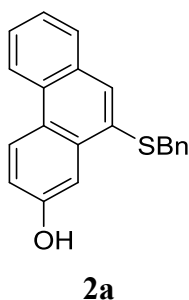

Compound **2a** was prepared in 99% yield (31.5 mg) according to the general procedure (Table 2, entry 1). The product was purified by chromatography on silica gel (eluent: hexanes/ethyl acetate = 5/1) as a white solid (mp 147–148 °C).  $^1\text{H}$  NMR (400 MHz,  $\text{CD}_3\text{OD}$ )  $\delta$  8.58 (d,  $J = 8.8$  Hz, 1H), 8.51 (d,  $J = 8.0$  Hz, 1H), 7.86 (d,  $J = 2.4$  Hz, 1H),

7.66 – 7.64 (m, 2H), 7.54 – 7.50 (m, 1H), 7.44 – 7.40 (m, 1H), 7.25 – 7.15 (m, 6H), 4.17 (s, 2H);  $^{13}\text{C}$  NMR (100 MHz,  $\text{CD}_3\text{OD}$ )  $\delta$  157.8, 138.9, 134.4, 131.9, 131.8, 131.4, 131.2, 130.1, 129.3, 129.0, 128.1, 127.8, 126.6, 126.0, 125.3, 122.9, 118.3, 110.1, 39.5; IR (neat): 3446(bs), 1635, 1540, 1452, 1219, 980, 745, 699; HRESIMS Calcd for  $[\text{C}_{21}\text{H}_{16}\text{NaOS}]^+$  ( $\text{M} + \text{Na}^+$ ) 339.0814, found 339.0819.

### 10-(ethylthio)phenanthren-2-ol (**2b**)

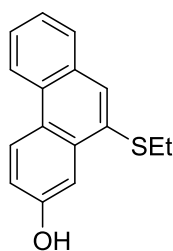

**2b**

Compound **2b** was prepared in 99% yield (25.2 mg) according to the general procedure (Table 2, entry 2). The product was purified by chromatography on silica gel (eluent: hexanes/ethyl acetate = 5/1) as a white solid (mp 223–226 °C).  $^1\text{H}$  NMR (400 MHz,  $\text{DMSO}-d_6$ )  $\delta$  10.03 (s, 1H), 8.67 (d,  $J = 8.0$  Hz, 1H), 8.59 (d,  $J = 8.0$  Hz, 1H), 7.87 (d,  $J = 7.6$  Hz, 1H), 7.79 (s, 1H), 7.65 (d,  $J = 1.6$  Hz, 1H), 7.58 – 7.48 (m, 2H), 7.23 (d,  $J = 8.8$  Hz, 1H), 3.12 (q,  $J = 7.2$  Hz, 2H), 1.32 (t,  $J = 7.2$  Hz, 3H).;  $^{13}\text{C}$  NMR (100 MHz,  $\text{DMSO}-d_6$ )  $\delta$  156.6, 132.1, 130.8, 130.1, 128.9, 127.7, 126.5, 125.8, 125.7, 125.2, 123.0, 122.0, 117.6, 108.2, 26.1, 13.9; IR (neat): 3423(bs), 1652, 1559, 1540, 1456, 1220, 901, 743; HRESIMS Calcd for  $[\text{C}_{16}\text{H}_{14}\text{NaOS}]^+$  ( $\text{M} + \text{Na}^+$ ) 277.0658, found 277.0651.

### 10-(phenylthio)phenanthren-2-ol (**2c**)

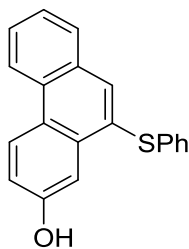

**2c**

Compound **2c** was prepared in 99% yield (29.9 mg) according to the general procedure (Table 2, entry 3). The product was purified by chromatography on silica gel (eluent:

hexanes/ethyl acetate = 6/1) as a white solid (mp 173–175 °C).  $^1\text{H}$  NMR (400 MHz, DMSO- $d_6$ )  $\delta$  9.93 (brs, 1H), 8.71 (d,  $J$  = 8.8 Hz, 1H), 8.67 (d,  $J$  = 8.4 Hz, 1H), 8.13 (s, 1H), 7.91 (d,  $J$  = 8.0 Hz, 1H), 7.72 (d,  $J$  = 2.0 Hz, 1H), 7.69 – 7.65 (m, 1H), 7.60 – 7.52 (m, 1H), 7.29 – 7.23 (m, 3H), 7.20 – 7.16 (m, 3H);  $^{13}\text{C}$  NMR (100 MHz, DMSO- $d_6$ )  $\delta$  157.0, 136.1, 135.2, 133.0, 130.7, 129.8, 129.4, 128.6, 128.0, 127.9, 127.1, 126.2, 125.9, 125.4, 123.7, 122.2, 118.0, 109.3; IR (neat): 3433(bs), 1652, 1635, 1540, 1456, 1217, 741, 687; HRESIMS Calcd for  $[\text{C}_{20}\text{H}_{14}\text{NaOS}]^+$  ( $\text{M} + \text{Na}^+$ ) 325.0658, found 325.0663.

### 10-(benzylthio)-7-methylphenanthren-2-ol (**2d**)

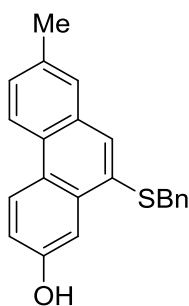

**2d**

Compound **2d** was prepared in 99% yield (32.7 mg) according to the general procedure (Table 2, entry 4). The product was purified by chromatography on silica gel (eluent: hexanes/ethyl acetate = 5/1) as a white solid (mp 153–156 °C).  $^1\text{H}$  NMR (400 MHz, DMSO- $d_6$ )  $\delta$  9.96 (s, 1H), 8.61 (d,  $J$  = 9.2 Hz, 1H), 8.48 (d,  $J$  = 8.4 Hz, 1H), 7.74 (s, 1H), 7.65 (d,  $J$  = 2.0 Hz, 1H), 7.59 (s, 1H), 7.43 – 7.40 (m, 3H), 7.32 – 7.28 (m, 2H), 7.25 – 7.19 (m, 2H), 4.36 (s, 2H), 2.46 (s, 3H);  $^{13}\text{C}$  NMR (100 MHz, DMSO- $d_6$ )  $\delta$  156.3, 137.1, 134.9, 131.5, 130.5, 130.1, 129.0, 128.4, 128.3, 127.2, 127.1, 127.0, 126.4, 125.0, 123.1, 122.0, 117.5, 108.1, 36.6, 20.9; IR (neat): 3407(bs), 1652, 1506, 1362, 1028, 953, 698; HRESIMS Calcd for  $[\text{C}_{22}\text{H}_{18}\text{NaOS}]^+$  ( $\text{M} + \text{Na}^+$ ) 353.0971, found 353.0958.

### 10-(benzylthio)-6-methylphenanthren-2-ol (**2e**)

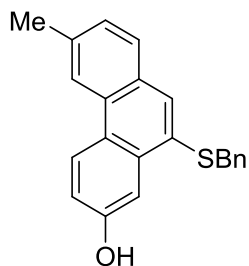

**2e**

Compound **2e** was prepared in 95% yield (31.4 mg) according to the general procedure (Table 2, entry 5). The product was purified by chromatography on silica gel (eluent: hexanes/ethyl acetate = 5/1) as a white solid (mp 138–139 °C). <sup>1</sup>H NMR (400 MHz, CDCl<sub>3</sub>) δ 8.57 (d, *J* = 8.8 Hz, 1H), 8.30 (s, 1H), 7.86 (d, *J* = 2.8 Hz, 1H), 7.71 (s, 1H), 7.59 (d, *J* = 8.0 Hz, 1H), 7.32 (d, *J* = 7.2 Hz, 1H), 7.24 – 7.21 (m, 6H), 5.25 (s, 1H), 4.14 (s, 2H), 2.58 (s, 3H); <sup>13</sup>C NMR (100 MHz, CDCl<sub>3</sub>) δ 154.6, 137.6, 136.9, 133.4, 131.8, 130.1, 129.1, 129.0, 128.6, 128.4, 128.0, 127.7, 127.2, 125.0, 124.8, 121.8, 116.5, 109.1, 39.6, 22.2; IR (neat): 3446(bs), 1636, 1452, 1219, 1059, 996, 736, 698; HRESIMS Calcd for [C<sub>22</sub>H<sub>18</sub>NaOS]<sup>+</sup> (M + Na<sup>+</sup>) 353.0971, found 353.0963.

#### 10-(benzylthio)-6-methoxyphenanthren-2-ol (**2f**)

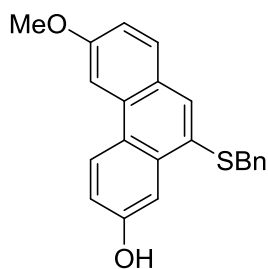

**2f**

Compound **2f** was prepared in 92% yield (31.9 mg) according to the general procedure (Table 2, entry 6). The product was purified by chromatography on silica gel (eluent: hexanes/ethyl acetate = 4/1) as a white solid (mp 176–180 °C). <sup>1</sup>H NMR (400 MHz, CDCl<sub>3</sub>) δ 8.47 (d, *J* = 8.8 Hz, 1H), 7.89 (s, 1H), 7.85 (s, 1H), 7.68 (s, 1H), 7.59 (d, *J* = 8.8 Hz, 1H), 7.21 – 7.11 (m, 7H), 5.55 (s, 1H), 4.07 (s, 2H), 3.97 (s, 3H); <sup>13</sup>C NMR (100 MHz, CDCl<sub>3</sub>) δ 158.8, 154.8, 137.7, 133.8, 132.6, 131.6, 129.7, 129.0, 128.4, 127.1, 127.0, 125.4, 125.1, 124.5, 116.4, 116.0, 109.8, 103.4, 55.4, 39.8; IR (neat):

3403(bs), 1615, 1500, 1452, 1222, 1165, 818, 696; HRESIMS Calcd for  $[\text{C}_{22}\text{H}_{18}\text{NaO}_2\text{S}]^+$  ( $\text{M} + \text{Na}^+$ ) 369.0920, found 369.0918.

### 10-(benzylthio)-6-chlorophenanthren-2-ol (**2g**)

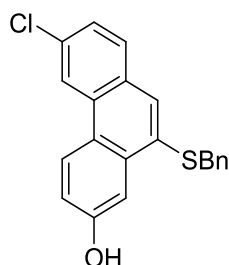

**2g**

Compound **2g** was prepared in 96% yield (33.3 mg) according to the general procedure (Table 2, entry 7). The product was purified by chromatography on silica gel (eluent: hexanes/ethyl acetate = 6/1) as a yellow solid (mp 171–173 °C).  $^1\text{H}$  NMR (400 MHz,  $\text{DMSO-}d_6$ )  $\delta$  10.16 (s, 1H), 8.70 (d,  $J = 8.8$  Hz, 1H), 8.66 (s, 1H), 7.85 – 7.83 (m, 2H), 7.64 (d,  $J = 2.0$  Hz, 1H), 7.51 (d,  $J = 8.4$  Hz, 1H), 7.43 (d,  $J = 7.2$  Hz, 2H), 7.32 – 7.28 (m, 2H), 7.25 – 7.22 (m, 2H), 4.39 (s, 2H);  $^{13}\text{C}$  NMR (100 MHz,  $\text{DMSO-}d_6$ )  $\delta$  157.2, 136.9, 132.1, 131.6, 131.4, 130.2, 129.6, 129.1, 128.5, 128.4, 127.3, 125.9, 125.8, 125.3, 121.9, 121.5, 117.9, 108.0, 36.4; IR (neat): 3443(bs), 1653, 1616, 1488, 1214, 1085, 860, 746; HRESIMS Calcd for  $[\text{C}_{21}\text{H}_{15}\text{ClNaOS}]^+$  ( $\text{M} + \text{Na}^+$ ) 373.0424, found 373.0425.

### 10-(benzylthio)-6-fluorophenanthren-2-ol (**2h**)

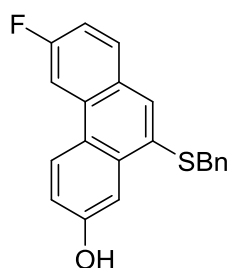

**2h**

Compound **2h** was prepared in 99% yield (33.1 mg) according to the general procedure (Table 2, entry 8). The product was purified by chromatography on silica gel (eluent: hexanes/ethyl acetate = 5/1) as a white solid (mp 123–126 °C).  $^1\text{H}$  NMR (400 MHz,



CDCl<sub>3</sub>)  $\delta$  8.40 (d,  $J$  = 8.8 Hz, 1H), 8.08 (dd,  $J$  = 11.2, 2.0 Hz, 1H), 7.86 (d,  $J$  = 2.8 Hz, 1H), 7.67 – 7.62 (m, 2H), 7.24 – 7.20 (m, 7H), 5.50 (s, 1H), 4.13 (s, 2H); <sup>13</sup>C NMR (100 MHz, CDCl<sub>3</sub>)  $\delta$  161.8 (d,  $J$  = 245.8 Hz), 155.1, 137.4, 133.5, 131.6 (d,  $J$  = 9.0 Hz), 130.9, 130.2, 130.1, 129.6 (d,  $J$  = 2.0 Hz), 129.0, 128.4, 127.2, 125.3, 124.3 (d,  $J$  = 4.0 Hz), 116.9, 114.9 (d,  $J$  = 24.0 Hz), 109.8, 107.1 (d,  $J$  = 20.0 Hz), 39.4; <sup>19</sup>F NMR (376 MHz, CDCl<sub>3</sub>)  $\delta$  -112.6; IR (neat): 3416(bs), 1616, 1496, 1212, 1171, 1078, 821, 698, 654; HRESIMS Calcd for [C<sub>21</sub>H<sub>15</sub>FNaOS]<sup>+</sup> (M + Na<sup>+</sup>) 357.0720, found 357.0724.

### 10-(benzylthio)-7-fluorophenanthren-2-ol (**2i**)

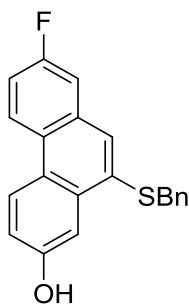

**2i**

Compound **2i** was prepared in 91% yield (30.3 mg) according to the general procedure (Table 2, entry 9). The product was purified by chromatography on silica gel (eluent: hexanes/ethyl acetate = 5/1) as a white solid (mp 147–149 °C). <sup>1</sup>H NMR (400 MHz, DMSO-*d*<sub>6</sub>)  $\delta$  9.98 (brs, 1H), 8.67 – 8.61 (m, 2H), 7.83 (s, 1H), 7.65 – 7.60 (m, 2H), 7.46 – 7.42 (m, 2H), 7.40 (dd,  $J$  = 8.8, 2.4 Hz, 1H), 7.33 – 7.29 (m, 2H), 7.26 – 7.22 (m, 2H), 4.39 (s, 2H); <sup>13</sup>C NMR (100 MHz, DMSO-*d*<sub>6</sub>)  $\delta$  160.1 (d,  $J$  = 241.0 Hz), 156.5, 136.8, 132.7, 131.3 (d,  $J$  = 9.0 Hz), 131.2, 129.1, 128.5, 127.3, 125.7 (d,  $J$  = 1.0 Hz), 125.2, 124.8 (d,  $J$  = 5.0 Hz), 124.7, 122.7, 118.0, 115.0 (d,  $J$  = 23.0 Hz), 111.4 (d,  $J$  = 20.0 Hz), 108.0, 36.3; <sup>19</sup>F NMR (376 MHz, CDCl<sub>3</sub>)  $\delta$  -116.1; IR (neat): 3377(bs), 1617, 1487, 1455, 1231, 1164, 804, 697; HRESIMS Calcd for [C<sub>21</sub>H<sub>15</sub>FNaOS]<sup>+</sup> (M + Na<sup>+</sup>) 357.0720, found 357.0709.

### 7-(benzylthio)-1,2,3,4-tetrahydrobenzo[*c*]phenanthren-5-ol (**2j**)

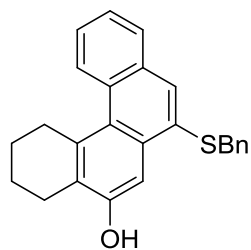

**2j**

Compound **2j** was prepared in 81% yield (30.1 mg) according to the general procedure (Table 2, entry 10). The product was purified by chromatography on silica gel (eluent: hexanes/ethyl acetate = 5/1) as a white solid (mp 132–134 °C). <sup>1</sup>H NMR (400 MHz, CDCl<sub>3</sub>) δ 8.60 (d, *J* = 8.4 Hz, 1H), 7.81 (s, 1H), 7.70 (dd, *J* = 7.2, 1.2 Hz, 1H), 7.66 (s, 1H), 7.51 – 7.44 (m, 2H), 7.26 – 7.23 (m, 5H), 5.28 (brs, 1H), 4.16 (s, 2H), 3.51 (t, *J* = 5.6 Hz, 2H), 2.93 (t, *J* = 6.8 Hz, 2H), 2.02 – 1.96 (m, 2H), 1.80 – 1.74 (m, 2H); <sup>13</sup>C NMR (100 MHz, CDCl<sub>3</sub>) δ 152.6, 138.1, 137.5, 132.1, 131.8, 130.8, 130.4, 130.2, 129.0, 128.4, 128.0, 127.6, 127.2, 125.7, 125.6, 125.0, 106.9, 39.4, 34.4, 24.1, 24.0, 22.1; IR (neat): 3384(bs), 1652, 1596, 1456, 1257, 1056, 747, 698; HRESIMS Calcd for [C<sub>25</sub>H<sub>22</sub>NaOS]<sup>+</sup> (M + Na<sup>+</sup>) 393.1284, found 393.1278.

#### 10-(benzylthio)-4-methylphenanthren-2-ol (**2k**)

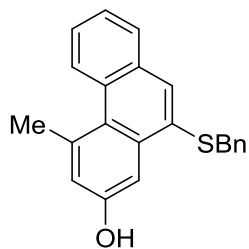

**2k**

Compound **2k** was prepared in 94% yield (31.1 mg) according to the general procedure (Table 2, entry 11). The product was purified by chromatography on silica gel (eluent: hexanes/ethyl acetate = 5/1) as a white solid (mp 133–134 °C). <sup>1</sup>H NMR (400 MHz, DMSO-*d*<sub>6</sub>) δ 8.63 (d, *J* = 8.4 Hz, 1H), 7.81 (dd, *J* = 7.6, 1.2 Hz, 1H), 7.77 (s, 1H), 7.63 (d, *J* = 2.4 Hz, 1H), 7.55 – 7.46 (m, 2H), 7.40 – 7.38 (m, 2H), 7.29 – 7.25 (m, 2H), 7.23 – 7.19 (m, 1H), 7.10 (d, *J* = 2.4 Hz, 1H), 4.32 (s, 2H), 2.97 (s, 3H); <sup>13</sup>C NMR (100 MHz, DMSO-*d*<sub>6</sub>) δ 155.3, 137.8, 137.1, 133.5, 131.2(3), 131.2(0), 129.9, 129.1, 128.4, 127.9, 127.2, 126.9, 126.2, 125.7, 125.0, 122.9, 121.5, 107.0, 36.7, 27.0; IR (neat): 3398(bs),

1653, 1558, 1418, 1283, 1106, 881, 779, 669; HRESIMS Calcd for  $[C_{22}H_{18}NaOS]^+$  ( $M + Na^+$ ) 353.0971, found 353.0979.

### 10-(benzylthio)-4-methoxyphenanthren-2-ol (**2l**)

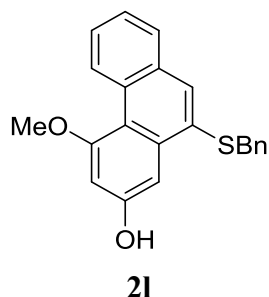

Compound **2l** was prepared in 99% yield (34.3 mg) according to the general procedure (Table 2, entry 12). The product was purified by chromatography on silica gel (eluent: hexanes/ethyl acetate = 4/1) as a white solid (mp 176–180 °C).  $^1H$  NMR (400 MHz, DMSO- $d_6$ )  $\delta$  9.86 (s, 1H), 8.66 (d,  $J = 8.4$  Hz, 1H), 8.15 (s, 1H), 7.80 (d,  $J = 7.6$  Hz, 1H), 7.71 (s, 1H), 7.69 (s, 1H), 7.58 – 7.53 (m, 1H), 7.52 – 7.47 (m, 1H), 7.41 – 7.39 (m, 2H), 7.32 – 7.27 (m, 2H), 7.24 – 7.20 (m, 1H), 4.34 (s, 2H), 4.03 (s, 3H);  $^{13}C$  NMR (100 MHz, DMSO- $d_6$ )  $\delta$  149.1, 147.5, 137.3, 130.6, 130.4, 129.2, 128.6, 128.5, 127.8, 127.3, 126.2, 125.8, 125.6, 124.4, 124.0, 122.7, 108.9, 104.7, 56.0, 36.8; IR (neat): 3426(bs), 1597, 1271, 1221, 1145, 1026, 804, 698; HRESIMS Calcd for  $[C_{22}H_{18}NaO_2S]^+$  ( $M + Na^+$ ) 369.0920, found 369.0934.

### 10-(benzylthio)-3-methylphenanthren-2-ol (**2m**)

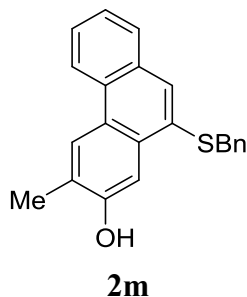

Compound **2m** was prepared in 99% yield (32.7 mg) according to the general procedure (Table 2, entry 13). The product was purified by chromatography on silica gel (eluent: hexanes/ethyl acetate = 5/1) as a white solid (mp 161–165 °C).  $^1H$  NMR (400 MHz, DMSO- $d_6$ )  $\delta$  10.05 (s, 1H), 8.61 (d,  $J = 8.0$  Hz, 1H), 8.56 (s, 1H), 7.79 (d,  $J = 7.6$  Hz,

1H), 7.75 (d,  $J = 10.0$  Hz, 2H), 7.56 – 7.53 (m, 1H), 7.49 – 7.42 (m, 3H), 7.32 – 7.23 (m, 3H), 4.37 (s, 2H), 2.42 (s, 3H);  $^{13}\text{C}$  NMR (100 MHz,  $\text{DMSO-}d_6$ )  $\delta$  155.4, 137.1, 130.5, 130.2, 130.1, 129.0, 128.8, 128.4, 127.7, 127.2, 126.7, 126.3, 125.6, 125.5, 125.2, 123.0, 122.0, 107.5, 36.6, 16.6; IR (neat): 3410(bs), 1623, 1451, 1270, 1134, 1021, 745, 696; HRESIMS Calcd for  $[\text{C}_{22}\text{H}_{18}\text{NaOS}]^+$  ( $\text{M} + \text{Na}^+$ ) 353.0971, found 353.0968.

### 10-(benzylthio)-3-methoxyphenanthren-2-ol (**2n**)

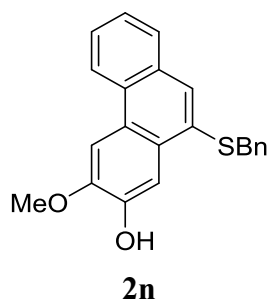

Compound **2n** was prepared in 99% yield (34.3 mg) according to the general procedure (Table 2, entry 14). The product was purified by chromatography on silica gel (eluent: hexanes/ethyl acetate = 5/1) as a white solid (mp 182–188 °C).  $^1\text{H}$  NMR (400 MHz,  $\text{DMSO-}d_6$ )  $\delta$  9.82 (s, 1H), 8.68 (d,  $J = 7.6$  Hz, 1H), 8.17 (s, 1H), 7.80 (d,  $J = 7.2$  Hz, 1H), 7.77 – 7.69 (m, 2H), 7.58 – 7.48 (m, 2H), 7.45 – 7.38 (m, 2H), 7.32 – 7.22 (m, 3H), 4.36 (s, 2H), 4.04 (s, 3H);  $^{13}\text{C}$  NMR (100 MHz,  $\text{DMSO-}d_6$ )  $\delta$  149.0, 147.4, 137.2, 130.4, 130.3, 129.0, 128.4, 127.7, 127.2, 126.0, 125.7, 125.5, 124.3, 123.9, 122.5, 108.9, 105.9, 104.7, 55.8, 36.7; IR (neat): 3422(bs), 1497, 1457, 1270, 1194, 1143, 1016, 752; HRESIMS Calcd for  $[\text{C}_{22}\text{H}_{18}\text{NaO}_2\text{S}]^+$  ( $\text{M} + \text{Na}^+$ ) 369.0920, found 369.0918.

### 10-(benzylthio)-3-chlorophenanthren-2-ol (**2o**)

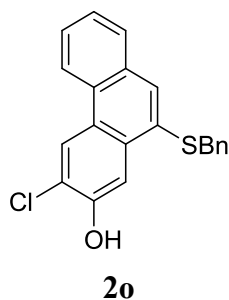

Compound **2o** was prepared in 87% yield (30.5 mg) according to the general procedure (Table 2, entry 15). The product was purified by chromatography on silica gel (eluent:

hexanes/ethyl acetate = 5/1) as a white solid (mp 177–178 °C).  $^1\text{H}$  NMR (400 MHz,  $\text{CDCl}_3$ )  $\delta$  8.60 (s, 1H), 8.39 (d,  $J$  = 8.0 Hz, 1H), 8.08 (s, 1H), 7.69 – 7.64 (m, 2H), 7.60 – 7.56 (m, 1H), 7.52 – 7.48 (m, 1H), 7.25 – 7.20 (m, 5H), 5.82 (s, 1H), 4.16 (s, 2H);  $^{13}\text{C}$  NMR (100 MHz,  $\text{CDCl}_3$ )  $\delta$  150.1, 137.1, 132.2, 131.2, 130.9, 130.5, 129.0, 128.5, 128.2, 127.3, 127.1, 126.5, 125.5, 123.8, 122.0, 121.5, 111.0, 39.2; IR (neat): 3437(bs), 1523, 1456, 1016, 1056, 939, 676; HRESIMS Calcd for  $[\text{C}_{21}\text{H}_{15}\text{ClNaOS}]^+$  ( $M + \text{Na}^+$ ) 373.0424, found 373.0429.

### 3.2. General procedure for the synthesis of the spirohexenones **3**

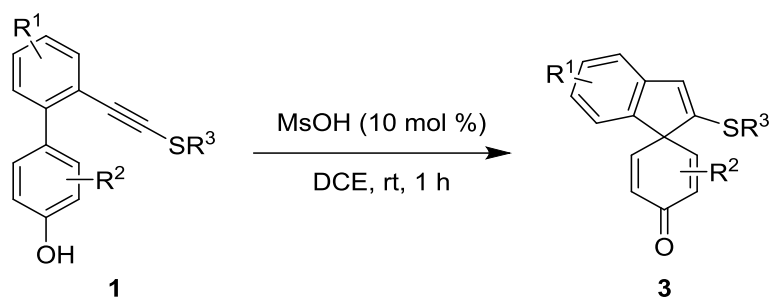

To a dry 4-mL vial were added alkyne **1** (0.1 mmol) and the solution of  $\text{MsOH}$  in  $\text{DCE}$  (0.01 M, 0.01 mmol, 1 mL). The resulting mixture was stirred at room temperature and the progress of the reaction was monitored by TLC. Upon completion, the mixture was quenched by  $\text{Et}_3\text{N}$  (0.012 mmol, 1.7  $\mu\text{L}$ ), concentrated under reduced pressure and the residue was purified by chromatography on silica gel (eluent: hexanes/ethyl acetate) to afford the desired spirohexenone **3**.

#### 2'-(benzylthio)spiro[cyclohexane-1,1'-indene]-2,5-dien-4-one (**3a**)

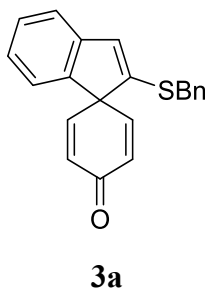

Compound **3a** was prepared in 99% yield (31.3 mg) according to the general procedure (Table 3, entry 1). The product was purified by chromatography on silica gel (eluent:

hexanes/ethyl acetate = 5/1) as a pale yellow oil.  $^1\text{H}$  NMR (400 MHz,  $\text{CDCl}_3$ )  $\delta$  7.37 – 7.23 (m, 7H), 7.13 – 7.10 (m, 1H), 7.03 (d,  $J = 7.2$  Hz, 1H), 6.71 (s, 1H), 6.49 (d,  $J = 10.0$  Hz, 2H), 6.33 (d,  $J = 10.0$  Hz, 2H), 4.13 (s, 2H);  $^{13}\text{C}$  NMR (100 MHz,  $\text{CDCl}_3$ )  $\delta$  186.0, 147.8, 145.9, 144.3, 141.1, 135.7, 130.8, 128.7, 128.6, 127.6, 127.3, 125.3, 123.3, 120.0, 61.0, 37.4; IR (neat): 2925, 1660(s), 1594, 1489, 1195, 1025, 753, 691; HRESIMS Calcd for  $[\text{C}_{21}\text{H}_{16}\text{NaOS}]^+$  ( $\text{M} + \text{Na}^+$ ) 339.0814, found 339.0819.

**2'-(ethylthio)spiro[cyclohexane-1,1'-indene]-2,5-dien-4-one (3b)**

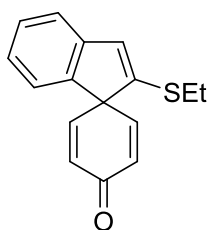

**3b**

Compound **3b** was prepared in 99% yield (25.2 mg) according to the general procedure (Table 3, entry 2). The product was purified by chromatography on silica gel (eluent: hexanes/ethyl acetate = 7/1) as a pale yellow oil.  $^1\text{H}$  NMR (400 MHz,  $\text{CDCl}_3$ )  $\delta$  7.32 – 7.25 (m, 2H), 7.14 – 7.10 (m, 1H), 7.05 (d,  $J = 7.6$  Hz, 1H), 6.66 (s, 1H), 6.52 (d,  $J = 10.0$  Hz, 2H), 6.39 (d,  $J = 10.0$  Hz, 2H), 2.96 (q,  $J = 7.2$  Hz, 2H), 1.39 (t,  $J = 7.2$  Hz, 3H);  $^{13}\text{C}$  NMR (100 MHz,  $\text{CDCl}_3$ )  $\delta$  186.1, 148.2, 146.6, 144.6, 141.0, 130.7, 128.7, 125.6, 125.0, 123.3, 119.7, 60.9, 26.6, 13.4; IR (neat): 2977, 1659(s), 1540, 1464, 1165, 1063, 840, 813, 697; HRESIMS Calcd for  $[\text{C}_{16}\text{H}_{14}\text{NaOS}]^+$  ( $\text{M} + \text{Na}^+$ ) 277.0658, found 277.0670.

**2'-(phenylthio)spiro[cyclohexane-1,1'-indene]-2,5-dien-4-one (3c)**

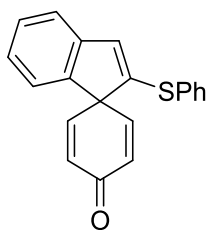

**3c**

Compound **3c** was prepared in 91% yield (27.5 mg) according to the general procedure

(Table 3, entry 3). The product was purified by chromatography on silica gel (eluent: hexanes/ethyl acetate = 6/1) as a yellow oil.  $^1\text{H}$  NMR (400 MHz,  $\text{CDCl}_3$ )  $\delta$  7.53 – 7.50 (m, 2H), 7.39 – 7.35 (m, 3H), 7.29 (dd,  $J = 8.0, 1.2$  Hz, 1H), 7.22 – 7.19 (m, 1H), 7.16 – 7.11 (m, 1H), 7.04 (d,  $J = 7.6$  Hz, 1H), 6.61 (s, 1H), 6.48 – 6.43 (m, 2H), 6.39 – 6.33 (m, 2H);  $^{13}\text{C}$  NMR (100 MHz,  $\text{CDCl}_3$ )  $\delta$  186.0, 147.6, 146.0, 143.8, 141.9, 134.0, 131.4, 130.9, 130.7, 129.4, 128.9, 128.7, 125.7, 123.4, 120.5, 61.0; IR (neat): 2873, 1656(s), 1612, 1478, 1326, 1034, 920, 714, 689; HRESIMS Calcd for  $[\text{C}_{20}\text{H}_{14}\text{NaOS}]^+$  ( $\text{M} + \text{Na}^+$ ) 325.0658, found 325.0655.

**2'-(benzylthio)-5'-methylspiro[cyclohexane-1,1'-indene]-2,5-dien-4-one (3d)**

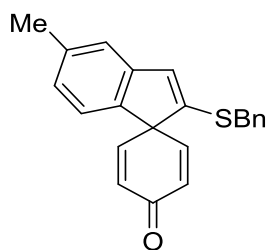

**3d**

Compound **3d** was prepared in 99% yield (32.7 mg) according to the general procedure (Table 3, entry 4). The product was purified by chromatography on silica gel (eluent: hexanes/ethyl acetate = 5/1) as a pale yellow oil.  $^1\text{H}$  NMR (400 MHz,  $\text{CDCl}_3$ )  $\delta$  7.36 – 7.25 (m, 5H), 7.07 (s, 1H), 6.95 – 6.91 (m, 2H), 6.66 (s, 1H), 6.47 (d,  $J = 10.0$  Hz, 2H), 6.32 (d,  $J = 10.0$  Hz, 2H), 4.12 (s, 2H), 2.36 (s, 3H);  $^{13}\text{C}$  NMR (100 MHz,  $\text{CDCl}_3$ )  $\delta$  186.1, 148.1, 145.9, 144.5, 138.7, 138.1, 135.8, 130.7, 128.7, 128.6, 127.6, 127.5, 126.1, 123.0, 120.8, 60.8, 37.5, 21.5; IR (neat): 2923, 1662(s), 1623, 1540, 1456, 1062, 883, 712, 679; HRESIMS Calcd for  $[\text{C}_{22}\text{H}_{18}\text{NaOS}]^+$  ( $\text{M} + \text{Na}^+$ ) 353.0971, found 353.0965.

**2'-(benzylthio)-6'-methylspiro[cyclohexane-1,1'-indene]-2,5-dien-4-one (3e)**

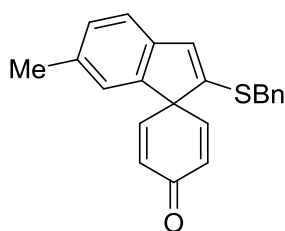

**3e**

Compound **3e** was prepared in 97% yield (32.0mg) according to the general procedure (Table 3, entry 5). The product was purified by chromatography on silica gel (eluent: hexanes/ethyl acetate = 6/1) as a white solid (mp 117–120 °C). <sup>1</sup>H NMR (400 MHz, CDCl<sub>3</sub>) δ 7.37 – 7.27 (m, 5H), 7.13 (d, *J* = 7.6 Hz, 1H), 7.10 (d, *J* = 8.0 Hz, 1H), 6.86 (s, 1H), 6.69 (s, 1H), 6.49 (d, *J* = 10.0 Hz, 2H), 6.33 (d, *J* = 10.0 Hz, 2H), 4.11 (s, 2H), 2.31 (s, 3H); <sup>13</sup>C NMR (100 MHz, CDCl<sub>3</sub>) δ 186.1, 148.1, 144.3, 141.8, 141.4, 135.9, 135.5, 130.8, 129.3, 128.8, 128.7, 128.0, 127.6, 124.2, 119.8, 61.0, 37.6, 21.3; IR (neat): 2921, 1662(s), 1623, 1558, 1540, 1063, 863, 699; HRESIMS Calcd for [C<sub>22</sub>H<sub>18</sub>NaOS]<sup>+</sup> (M + Na<sup>+</sup>) 353.0971, found 353.0979.

**2'-(benzylthio)-6'-methoxyspiro[cyclohexane-1,1'-indene]-2,5-dien-4-one (3f)**

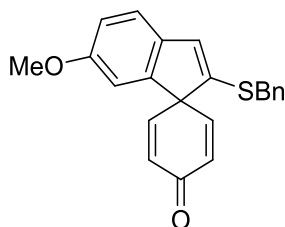

**3f**

Compound **3f** was prepared in 95% yield (32.9 mg) according to the general procedure (Table 3, entry 6). The product was purified by chromatography on silica gel (eluent: hexanes/ethyl acetate = 5/1) as a white solid (mp 109–113 °C). <sup>1</sup>H NMR (400 MHz, CDCl<sub>3</sub>) δ 7.32 – 7.24 (m, 5H), 7.15 (d, *J* = 8.0 Hz, 1H), 6.83 (d, *J* = 8.0 Hz, 1H), 6.68 (s, 1H), 6.61 (s, 1H), 6.48 (d, *J* = 9.6 Hz, 2H), 6.31 (d, *J* = 9.6 Hz, 2H), 4.06 (s, 2H), 3.73 (s, 3H); <sup>13</sup>C NMR (100 MHz, CDCl<sub>3</sub>) δ 185.9, 158.3, 147.9, 143.1, 142.0, 137.2, 136.0, 130.7, 128.7, 128.5, 127.4, 120.6, 114.2, 109.6, 61.1, 55.5, 37.8; IR (neat): 2934, 1663(s), 1622, 1474, 1282, 1232, 864, 712, 696; HRESIMS Calcd for [C<sub>22</sub>H<sub>18</sub>NaO<sub>2</sub>S]<sup>+</sup> (M + Na<sup>+</sup>) 369.0920, found 369.0903.

**2'-(benzylthio)-6'-chlorospiro[cyclohexane-1,1'-indene]-2,5-dien-4-one (3g)**



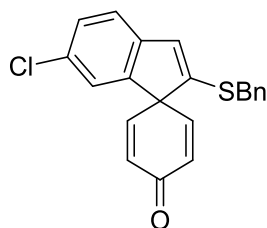

**3g**

Compound **3g** was prepared in 93% yield (32.6 mg) according to the general procedure (Table 3, entry 7). The product was purified by chromatography on silica gel (eluent: hexanes/ethyl acetate = 5/1) as a pale yellow oil.  $^1\text{H}$  NMR (400 MHz,  $\text{CDCl}_3$ )  $\delta$  7.37 – 7.24 (m, 6H), 7.15 (d,  $J$  = 8.0 Hz, 1H), 7.01 (d,  $J$  = 1.6 Hz, 1H), 6.65 (s, 1H), 6.51 (d,  $J$  = 10.0 Hz, 2H), 6.31 (d,  $J$  = 10.0 Hz, 2H), 4.13 (s, 2H);  $^{13}\text{C}$  NMR (100 MHz,  $\text{CDCl}_3$ )  $\delta$  185.6, 146.9, 146.8, 142.9, 142.7, 135.5, 131.2, 131.1, 128.9, 128.7, 128.7, 127.7, 126.1, 123.8, 120.6, 60.8, 37.4; IR (neat): 2924, 1663(s), 1623, 1454, 1063, 860, 731, 697; HRESIMS Calcd for  $[\text{C}_{21}\text{H}_{15}\text{ClNaOS}]^+$  ( $\text{M} + \text{Na}^+$ ) 373.0424, found 373.0426.

### 2'-(benzylthio)-6'-fluorospiro[cyclohexane-1,1'-indene]-2,5-dien-4-one (**3h**)

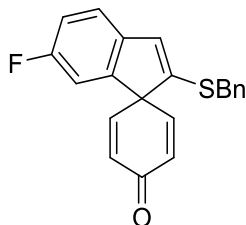

**3h**

Compound **3h** was prepared in 95% yield (31.7 mg) according to the general procedure (Table 3, entry 8). The product was purified by chromatography on silica gel (eluent: hexanes/ethyl acetate = 5/1) as a yellow solid (mp 122–124 °C).  $^1\text{H}$  NMR (400 MHz,  $\text{CDCl}_3$ )  $\delta$  7.37 – 7.24 (m, 5H), 7.17 (dd,  $J$  = 8.4, 4.8 Hz, 1H), 7.00 – 6.95 (m, 1H), 6.76 (dd,  $J$  = 8.0, 2.4 Hz, 1H), 6.67 (s, 1H), 6.51 – 6.45 (m, 2H), 6.32 – 6.28 (m, 2H), 4.11 (s, 2H);  $^{13}\text{C}$  NMR (100 MHz,  $\text{CDCl}_3$ )  $\delta$  185.7, 161.3 (d,  $J$  = 246.0 Hz), 147.1, 145.4 (d,  $J$  = 4.0 Hz), 143.3 (d,  $J$  = 8.0 Hz), 140.3 (d,  $J$  = 2.0 Hz), 135.7, 131.1, 128.7, 128.6, 127.7, 126.7, 120.6 (d,  $J$  = 9.0 Hz), 115.5 (d,  $J$  = 22.0 Hz), 111.4 (d,  $J$  = 24.0 Hz), 60.9, 37.6;  $^{19}\text{F}$  NMR (376 MHz,  $\text{CDCl}_3$ )  $\delta$  -116.2; IR (neat): 2923, 1664(s), 1624, 1469, 1266, 1103, 865, 797, 713; HRESIMS Calcd for  $[\text{C}_{21}\text{H}_{15}\text{FNaOS}]^+$  ( $\text{M} + \text{Na}^+$ ) 357.0720, found

357.0723.

**2'-(benzylthio)-5'-fluorospiro[cyclohexane-1,1'-indene]-2,5-dien-4-one (3i)**

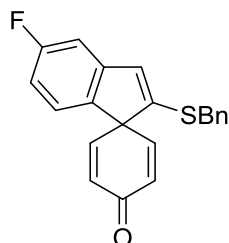

**3i**

Compound **3i** was prepared in 99% yield (33.3 mg) according to the general procedure (Table 3, entry 9). The product was purified by chromatography on silica gel (eluent: hexanes/ethyl acetate = 5/1) as a yellow solid (mp 126–128 °C). <sup>1</sup>H NMR (400 MHz, CDCl<sub>3</sub>) δ 7.37 – 7.28 (m, 5H), 6.96 – 6.90 (m, 2H), 6.80 – 6.76 (m, 1H), 6.64 (s, 1H), 6.48 (d, *J* = 10.0 Hz, 2H), 6.30 (d, *J* = 10.0 Hz, 2H), 4.14 (s, 2H); <sup>13</sup>C NMR (100 MHz, CDCl<sub>3</sub>) δ 185.6, 163.4 (d, *J* = 244.0 Hz), 148.7, 147.4, 146.1 (d, *J* = 9.0 Hz), 136.3 (d, *J* = 2.0 Hz), 135.3, 130.7, 128.6, 127.6, 125.7, 124.2 (d, *J* = 9.0 Hz), 111.7 (d, *J* = 23.0 Hz), 107.2 (d, *J* = 24.0 Hz), 60.1, 37.2; <sup>19</sup>F NMR (376 MHz, CDCl<sub>3</sub>) δ -113.2; IR (neat): 2956, 1662(s), 1622, 1462, 1226, 1134, 885, 771, 697; HRESIMS Calcd for [C<sub>21</sub>H<sub>15</sub>FN<sub>1</sub>OS]<sup>+</sup> (M + Na<sup>+</sup>) 357.0720, found 357.0710.

**2-(benzylthio)-5',6',7',8'-tetrahydro-4'H-spiro[indene-1,1'-naphthalen]-4'-one (3j)**

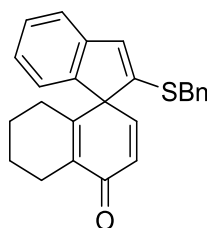

**3j**

Compound **3j** was prepared in 99% yield (36.7 mg) according to the general procedure (Table 3, entry 10). The product was purified by chromatography on silica gel (eluent: hexanes/ethyl acetate = 6/1) as a white solid (mp 155–158 °C). <sup>1</sup>H NMR (400 MHz, CDCl<sub>3</sub>) δ 7.40 – 7.35 (m, 2H), 7.34 – 7.29 (m, 2H), 7.28 – 7.21 (m, 3H), 7.10 – 7.05 (m, 1H), 6.93 (d, *J* = 7.2 Hz, 1H), 6.68 (s, 1H), 6.45 (d, *J* = 10.0 Hz, 1H), 6.19 (d, *J* = 10.0

Hz, 1H), 4.13 (s, 2H), 2.46 – 2.41 (m, 2H), 1.81 – 1.75 (m, 1H), 1.69 – 1.61 (m, 3H), 1.54 – 1.48 (m, 1H), 1.44 – 1.41 (m, 1H);  $^{13}\text{C}$  NMR (100 MHz,  $\text{CDCl}_3$ )  $\delta$  186.6, 151.6, 148.0, 147.8, 144.8, 143.6, 135.9, 135.6, 129.5, 128.7, 128.6, 128.2, 127.6, 126.3, 125.1, 122.5, 119.8, 63.6, 36.9, 25.1, 22.6, 21.9, 21.7; IR (neat): 2923, 1653(s), 1635, 1540, 1456, 1300, 1043, 772, 754; HRESIMS Calcd for  $[\text{C}_{25}\text{H}_{22}\text{NaOS}]^+$  ( $\text{M} + \text{Na}^+$ ) 393.1284, found 393.1284.

### 2'-(benzylthio)-2-methylspiro[cyclohexane-1,1'-indene]-2,5-dien-4-one (3k)

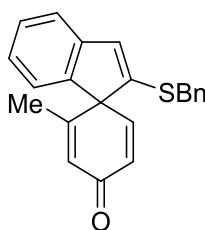

**3k**

Compound **3k** was prepared in 95% yield (31.4 mg) according to the general procedure (Table 3, entry 11). The product was purified by chromatography on silica gel (eluent: hexanes/ethyl acetate = 5/1) as a pale yellow oil.  $^1\text{H}$  NMR (400 MHz,  $\text{CDCl}_3$ )  $\delta$  7.40 – 7.37 (m, 2H), 7.34 – 7.31 (m, 2H), 7.28 – 7.25 (m, 3H), 7.12 – 7.08 (zm, 1H), 6.95 (d,  $J = 7.6$  Hz, 1H), 6.71 (s, 1H), 6.44 (dd,  $J = 10.0, 1.6$  Hz, 1H), 6.41 – 6.37 (m, 1H), 6.24 (d,  $J = 10.0$  Hz, 1H), 4.15 (s, 2H), 1.43 (d,  $J = 1.2$  Hz, 3H);  $^{13}\text{C}$  NMR (100 MHz,  $\text{CDCl}_3$ )  $\delta$  187.0, 157.1, 148.5, 147.1, 144.8, 142.7, 135.8, 129.9, 129.7, 128.7(4), 128.7(3), 128.6, 127.7, 126.8, 125.3, 122.7, 119.9, 63.8, 37.0, 18.4; IR (neat): 2917, 1670(s), 1522, 1457, 1289, 1126, 1056, 792, 698; HRESIMS Calcd for  $[\text{C}_{22}\text{H}_{18}\text{NaOS}]^+$  ( $\text{M} + \text{Na}^+$ ) 353.0971, found 353.0965.

### 2'-(benzylthio)-2-methoxyspiro[cyclohexane-1,1'-indene]-2,5-dien-4-one (3l)

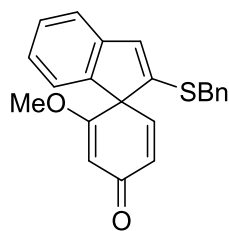

**3l**

Compound **3l** was prepared in 99% yield (34.3 mg) according to the general procedure (Table 3, entry 12). The product was purified by chromatography on silica gel (eluent: hexanes/ethyl acetate = 5/1) as a pale yellow oil. <sup>1</sup>H NMR (400 MHz, CDCl<sub>3</sub>) δ 7.37 – 7.34 (m, 2H), 7.33 – 7.29 (m, 2H), 7.28 – 7.23 (m, 3H), 7.13 – 7.08 (m, 1H), 7.03 (d, *J* = 7.6 Hz, 1H), 6.68 (s, 1H), 6.49 (d, *J* = 10.0 Hz, 1H), 6.24 (dd, *J* = 10.0, 2.4 Hz, 1H), 5.31 (d, *J* = 2.4 Hz, 1H), 4.12 (s, 2H), 3.60 (s, 3H); <sup>13</sup>C NMR (100 MHz, CDCl<sub>3</sub>) δ 181.1, 153.0, 148.4, 147.0, 143.9, 142.1, 135.8, 130.2, 128.6, 128.5, 128.4, 127.5, 126.3, 125.2, 123.0, 119.9, 114.3, 61.3, 55.0, 37.2; IR (neat): 2932, 1655(s), 1518, 1440, 1270, 1207, 1037, 867, 758, 696; HRESIMS Calcd for [C<sub>22</sub>H<sub>18</sub>NaO<sub>2</sub>S]<sup>+</sup> (M + Na<sup>+</sup>) 369.0920, found 369.0917.

**2'-(benzylthio)-3-methylspiro[cyclohexane-1,1'-indene]-2,5-dien-4-ol (3m)**

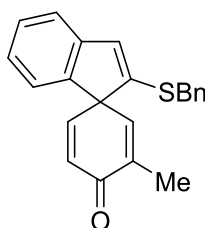

**3m**

Compound **3m** was prepared in 99% yield (32.8 mg) according to the general procedure (Table 3, entry 13). The product was purified by chromatography on silica gel (eluent: hexanes/ethyl acetate = 5/1) as a white solid (mp 183–185 °C). <sup>1</sup>H NMR (400 MHz, CDCl<sub>3</sub>) δ 7.38 – 7.30 (m, 4H), 7.29 – 7.25 (m, 2H), 7.25 – 7.21 (m, 1H), 7.13 – 7.09 (m, 1H), 7.01 (d, *J* = 7.6 Hz, 1H), 6.69 (s, 1H), 6.49 (d, *J* = 10.0 Hz, 1H), 6.31 (dd, *J* = 10.0, 2.8 Hz, 1H), 6.13 – 6.09 (m, 1H), 4.12 (s, 2H), 1.95 (d, *J* = 1.6 Hz, 3H); <sup>13</sup>C NMR (100 MHz, CDCl<sub>3</sub>) δ 186.7, 147.5, 146.5, 144.3, 142.7, 141.7, 137.5, 135.8, 130.6, 128.8, 128.7, 128.5, 127.6, 126.8, 125.2, 123.2, 119.9, 61.3, 37.4, 16.1; IR (neat): 2921, 1662(s), 1636, 1462, 1393, 1140, 910, 752, 715; HRESIMS Calcd for [C<sub>22</sub>H<sub>18</sub>NaOS]<sup>+</sup> (M + Na<sup>+</sup>) 353.0971, found 353.0978.

**2'-(benzylthio)-3-methoxyspiro[cyclohexane-1,1'-indene]-2,5-dien-4-ol (3n)**

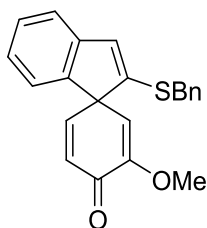

**3n**

Compound **3n** was prepared in 99% yield (34.3 mg) according to the general procedure (Table 3, entry 14). The product was purified by chromatography on silica gel (eluent: hexanes/ethyl acetate = 4/1) as a yellow solid (mp 164–169 °C). <sup>1</sup>H NMR (400 MHz, CDCl<sub>3</sub>) δ 7.39 – 7.24 (m, 7H), 7.14 – 7.09 (m, 1H), 7.04 (d, *J* = 7.2 Hz, 1H), 6.68 (s, 1H), 6.51 (d, *J* = 10.0 Hz, 1H), 6.27 (dd, *J* = 10.0, 2.4 Hz, 1H), 5.31 (d, *J* = 2.4 Hz, 1H), 4.13 (s, 2H), 3.62 (s, 3H); <sup>13</sup>C NMR (100 MHz, CDCl<sub>3</sub>) δ 181.2, 153.1, 148.5, 147.2, 144.0, 142.2, 135.9, 130.3, 128.7, 128.6, 128.5, 127.6, 126.4, 125.3, 123.1, 119.9, 114.3, 61.4, 55.1, 37.3; IR (neat): 2928, 1669(s), 1635, 1452, 1206, 1098, 895, 750, 714; HRESIMS Calcd for [C<sub>22</sub>H<sub>18</sub>NaO<sub>2</sub>S]<sup>+</sup> (M + Na<sup>+</sup>) 369.0920, found 369.0934.

**2'-(benzylthio)-3-chlorospiro[cyclohexane-1,1'-indene]-2,5-dien-4-one (3o)**

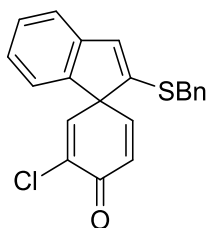

**3o**

Compound **3o** was prepared in 85% yield (29.8 mg) according to the general procedure (Table 3, entry 15). The product was purified by chromatography on silica gel (eluent: hexanes/ethyl acetate = 7/1) as a pale yellow oil. <sup>1</sup>H NMR (400 MHz, CDCl<sub>3</sub>) δ 7.37 – 7.24 (m, 7H), 7.16 – 7.11 (m, 1H), 7.05 (d, *J* = 7.2 Hz, 1H), 6.74 (s, 1H), 6.58 (d, *J* = 10.0 Hz, 1H), 6.47 (d, *J* = 2.0 Hz, 1H), 6.33 (dd, *J* = 10.0, 2.4 Hz, 1H), 4.13 (s, 2H); <sup>13</sup>C NMR (100 MHz, CDCl<sub>3</sub>) δ 179.0, 147.9, 144.9, 144.2, 143.5, 140.0, 135.6, 134.5, 130.1, 129.1, 128.8, 128.7, 128.4, 127.7, 125.7, 123.4, 120.3, 62.8, 37.7; IR (neat): 2926, 1669(s), 1653, 1558, 1457, 1062, 831, 749, 711; HRESIMS Calcd for [C<sub>21</sub>H<sub>15</sub>ClNaOS]<sup>+</sup> (M + Na<sup>+</sup>) 373.0424, found 373.0438.

### 3.3 Asymmetric dearomatization reaction

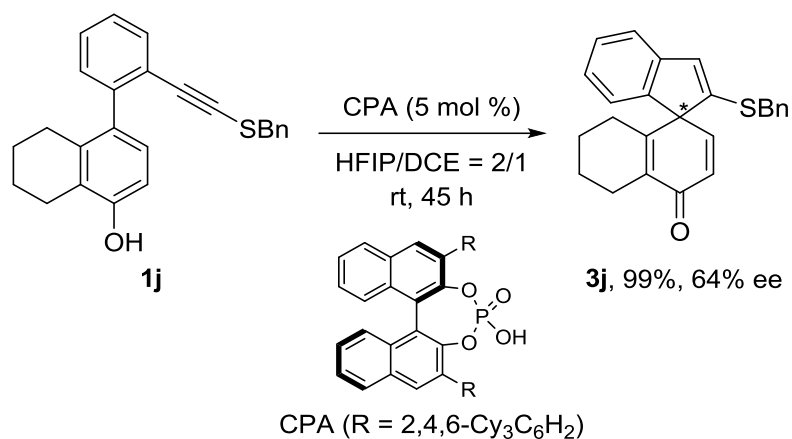

To a mixture of substrate **1j** (0.1 mmol, 37.1 mg) in HFIP (1.4 mL) and DCE (0.7 mL) was added CPA (0.005 mmol, 5.0 mg) at room temperature. The resulting mixture was stirred at room temperature and the progress of the reaction was monitored by TLC. Upon completion, the mixture was quenched by Et<sub>3</sub>N (0.012 mmol, 1.7 μL), concentrated under reduced pressure and the residue was purified by chromatography on silica gel (eluent: hexanes/ethyl acetate = 5/1) to afford the desired spirohexenone **3j** in 99% yield (36.7 mg).  $[\alpha]_D^{20} = -33.7^\circ$  ( $c = 1.0$ , CHCl<sub>3</sub>). 82:18 e.r. (determined by HPLC: Chiralpak IC Column, 10/90 i-PrOH/hexane, 1.0 mL/min, 254 nm; TR = 20.162 min (major), 23.022 min (minor)).

### 3.4 Synthetic transformations

#### ((10-(benzylthio)phenanthren-2-yl)oxy)triisopropylsilane (**4**)

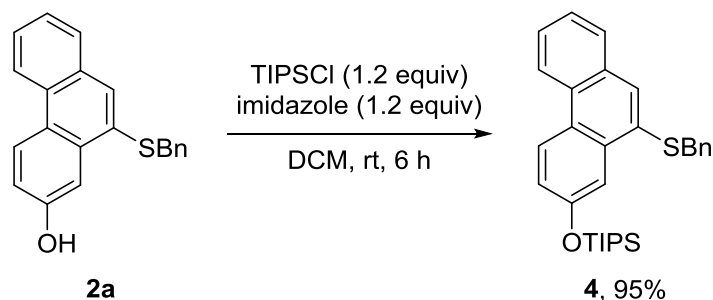

To a solution of **2a** (0.1 mmol, 31.6 mg) in DCM (1 mL) were added TIPSCl (0.12 mmol, 23.2 mg) and imidazole (0.12 mmol, 8.2 mg) sequentially. The mixture was stirred at room temperature and the progress of the reaction was monitored by TLC. Upon completion, the mixture was filtered through a pad of silica gel and concentrated

under reduced pressure. The residue was purified by chromatography on silica gel (eluent: hexanes/ethyl acetate) to give the desired product **4** in 95% yield (44.9 mg). White solid (mp 106–108 °C). <sup>1</sup>H NMR (400 MHz, CDCl<sub>3</sub>) δ 8.56 (d, *J* = 9.2 Hz, 1H), 8.52 (d, *J* = 8.4 Hz, 1H), 8.01 (d, *J* = 2.4 Hz, 1H), 7.72 (s, 1H), 7.69 (d, *J* = 7.2 Hz, 1H), 7.60 – 7.56 (m, 1H), 7.50 – 7.46 (m, 1H), 7.31 – 7.22 (m, 6H), 4.18 (s, 2H), 1.40 – 1.34 (m, 3H), 1.16 (d, *J* = 7.2 Hz, 18H); <sup>13</sup>C NMR (100 MHz, CDCl<sub>3</sub>) δ 155.3, 137.4, 133.0, 130.8, 130.7, 130.0, 128.9, 128.5, 128.0, 127.2, 126.8, 125.9, 125.1, 124.6, 122.0, 121.2, 114.3, 39.2, 18.1, 12.8; IR (neat): 2943, 1635, 1450, 1275, 1196, 993, 913, 749; HRESIMS Calcd for [C<sub>30</sub>H<sub>36</sub>NaOSSi]<sup>+</sup> (M + Na<sup>+</sup>) 495.2148, found 495.2152.

### benzyl(phenanthren-9-yl)sulfane (**5**)

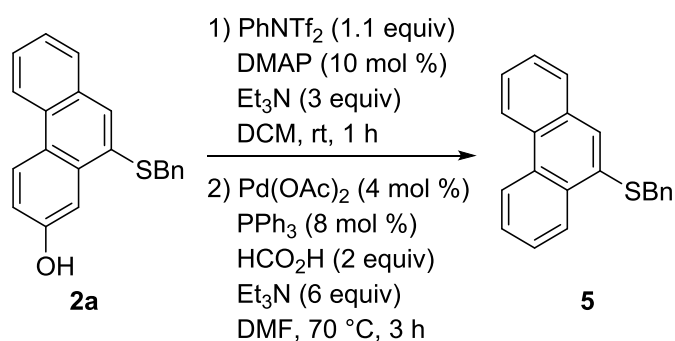

To a solution of **2a** (0.1 mmol, 31.7 mg) and Et<sub>3</sub>N (0.3 mmol, 30.3 mg) in DCM (1 mL) was added DMAP (0.01 mmol, 1.2 mg) and PhNTf<sub>2</sub> (0.11 mmol, 39.5 mg) sequentially. The mixture was reacted at room temperature for 1 h. The progress of the reaction was monitored by TLC. Upon completion, the reaction was quenched with 1M HCl, extracted with DCM for 3 times, dried over MgSO<sub>4</sub> and concentrated under vacuum. The residue was purified by chromatography on silica gel (eluent: hexanes/ethyl acetate = 15/1) to afford the desired triflate as a colorless oil. To the solution of triflate and Et<sub>3</sub>N (0.6 mmol, 61.0 mg) in DMF (1 mL) was added formic acid (0.2 mmol, 9.2 mg) and PPh<sub>3</sub> (0.008 mmol, 2.1 mg) and Pd(OAc)<sub>2</sub> (0.004 mmol, 0.9 mg) sequentially. The mixture was reacted at 70 °C for 3 h. The progress of the reaction was monitored by TLC. Upon completion, the reaction was quenched with H<sub>2</sub>O, extracted with EA for 3 times, dried over MgSO<sub>4</sub> and concentrated under vacuum. The residue was purified by chromatography on silica gel (eluent: hexanes/ethyl acetate = 50/1) to afford the desired

product **5** (26.1 mg, 87% yield). Pale yellow solid (mp 98–99 °C). <sup>1</sup>H NMR (400 MHz, CDCl<sub>3</sub>) δ 8.66 – 8.64 (m, 1H), 8.58 (d, *J* = 8.0 Hz, 1H), 8.50 – 8.48 (m, 1H), 7.71 – 7.66 (m, 2H), 7.65 – 7.60 (m, 2H), 7.59 – 7.50 (m, 2H), 7.28 – 7.19 (m, 5H), 4.18 (s, 2H); <sup>13</sup>C NMR (100 MHz, CDCl<sub>3</sub>) δ 137.2, 132.0, 131.7, 131.2, 130.6, 129.7, 129.2, 129.0, 128.5, 127.9, 127.2, 126.9, 126.8, 126.6, 125.6, 123.0, 122.5, 39.0; IR (neat): 3059, 3027, 2923, 1959, 1585, 1491, 1450, 1429, 745, 721; HRESIMS Calcd for [C<sub>21</sub>H<sub>16</sub>NaS]<sup>+</sup> (M + Na<sup>+</sup>) 323.0865, found 323.0871.

### phenanthren-2-ol (**6**)

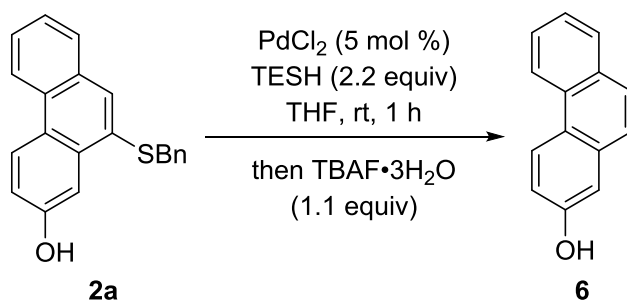

To a solution of **2a** (0.1 mmol, 31.6 mg) in THF (1 mL) was added PdCl<sub>2</sub> (0.005 mmol, 0.9 mg) and triethylsilane (0.22 mmol, 25.3 mg) sequentially. The mixture was reacted at room temperature for 1 h. The progress of the reaction was monitored by TLC. Upon completion, the mixture was added Tetrabutylammonium fluoride trihydrate (0.11 mmol, 34.7 mg), then quenched with NH<sub>4</sub>Cl aqueous solution, extracted with EA for 3 times, dried over MgSO<sub>4</sub> and concentrated under vacuum. The residue was purified by chromatography on silica gel (eluent: hexanes/ethyl acetate = 5/1) to afford the desired product **6** (17.7 mg, 91% yield). White solid (mp 158–164 °C). <sup>1</sup>H NMR (400 MHz, CDCl<sub>3</sub>) δ 8.57 (s, 1H), 8.55 (s, 1H), 7.84 (d, *J* = 7.6 Hz, 1H), 7.70 (d, *J* = 8.9 Hz, 1H), 7.64 – 7.58 (m, 2H), 7.55 – 7.51 (m, 1H), 7.24 – 7.19 (m, 2H), 5.15 (s, 1H); <sup>13</sup>C NMR (100 MHz, CDCl<sub>3</sub>) δ 154.2, 133.6, 131.0, 130.4, 128.6, 127.7, 126.7, 126.0, 125.7, 124.8, 124.6, 122.1, 116.6, 111.8; IR (neat): 3440(bs), 2029, 1959, 1620, 1464, 1423, 1261, 810, 741; HRESIMS Calcd for [C<sub>14</sub>H<sub>10</sub>NaO]<sup>+</sup> (M + Na<sup>+</sup>) 217.0624, found 217.0614.



### 2'-(benzylthio)spiro[cyclohexane-1,1'-indene]-2,5-dien-4-ol (7)

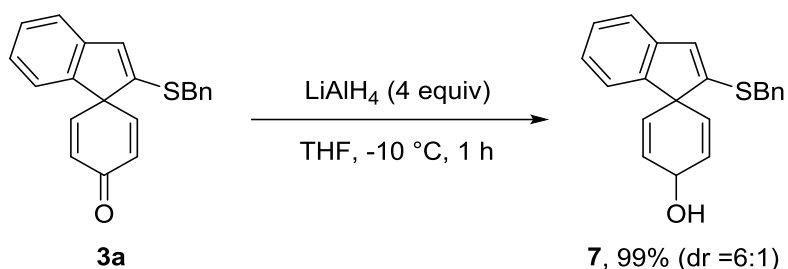

To a solution of **3a** (0.1 mmol, 31.6 mg) in THF (1 mL) was added LiAlH<sub>4</sub> (0.4 mmol, 15.6 mg) in THF (1 mL) slowly at -10 °C and stirred at this temperature for 1 h. The progress of the reaction was monitored by TLC. Upon completion, the mixture was quenched with 10% NaOH (aq), extracted with ethyl acetate for 3 times, dried over MgSO<sub>4</sub> and concentrated under vacuum. The residue was purified by chromatography on silica gel (eluent: hexanes/ethyl acetate = 7/1) to give **7** in 99% yield (31.5 mg) with 6:1 dr. White solid (mp 139–143 °C). <sup>1</sup>H NMR (400 MHz, CDCl<sub>3</sub>) δ 7.40 – 7.35 (m, 2H), 7.34 – 7.29 (m, 2H), 7.28 – 7.18 (m, 3H), 7.11 – 7.03 (m, 2H), 6.53 (s, 1H), 6.23 (dd, *J* = 10.0, 3.6 Hz, 2H), 5.34 (d, *J* = 9.6 Hz, 2H), 4.76 – 4.64 (m, 1H), 4.11 (s, 2H); <sup>13</sup>C NMR (100 MHz, CDCl<sub>3</sub>) δ 149.6, 148.1, 143.2, 136.2, 129.9, 129.8, 128.9, 128.6, 127.7, 127.5, 125.2, 124.7, 123.4, 119.5, 61.6, 58.3, 37.4; IR (neat): 3449(bs), 2923, 1636, 1457, 1093, 1052, 747, 697; HRESIMS Calcd for [C<sub>21</sub>H<sub>18</sub>NaOS]<sup>+</sup> (M + Na<sup>+</sup>) 341.0971, found 341.0966.

### 2'-(benzylsulfonyl)spiro[cyclohexane-1,1'-indene]-2,5-dien-4-ol (8)

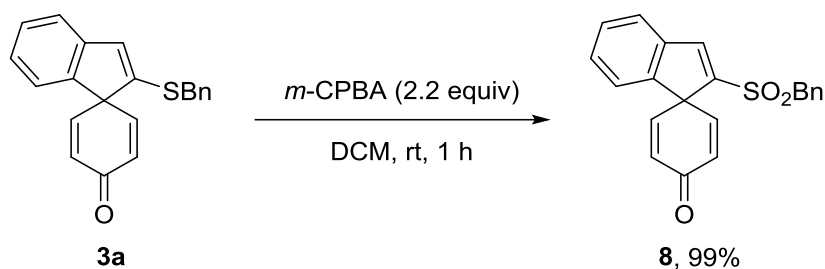

To a solution of **3a** (0.1 mmol, 31.6 mg) in DCM (2 mL) was added *m*-CPBA (0.22 mmol, 38.0 mg) and the mixture was reacted at room temperature for 1 h. The progress of the reaction was monitored by TLC. Upon completion, the reaction was quenched with NaHCO<sub>3</sub>, extracted with DCM for 3 times, dried over MgSO<sub>4</sub> and concentrated

under vacuum. The residue was purified by chromatography on silica gel (eluent: hexanes/ethyl acetate = 1/1) to afford the desired product **8** (34.5 mg, 99% yield) as a colorless oil.  $^1\text{H}$  NMR (400 MHz,  $\text{CDCl}_3$ )  $\delta$  7.66 (s, 1H), 7.56 – 7.52 (m, 1H), 7.45 – 7.42 (m, 2H), 7.38 – 7.32 (m, 5H), 7.17 – 7.13 (m, 1H), 6.58 (d,  $J$  = 10.0 Hz, 2H), 6.33 (d,  $J$  = 10.0 Hz, 2H), 4.31 (s, 2H);  $^{13}\text{C}$  NMR (100 MHz,  $\text{CDCl}_3$ )  $\delta$  185.2, 147.2, 144.6, 144.4, 144.2, 139.6, 131.4, 131.0, 130.5, 129.5, 129.1, 128.9, 127.2, 125.1, 124.2, 62.1, 58.5; IR (neat): 2949, 1698(s), 1574, 1416, 1306, 1263, 748, 720; HRESIMS Calcd for  $[\text{C}_{21}\text{H}_{16}\text{NaO}_3\text{S}]^+$  ( $\text{M} + \text{Na}^+$ ) 371.0712, found 371.0714.

**benzylfluoro(4-oxospiro[cyclohexane-1,1'-indene]-2,5-dien-2'-yl)sulfonium tetrafluoroborate (**9**)**

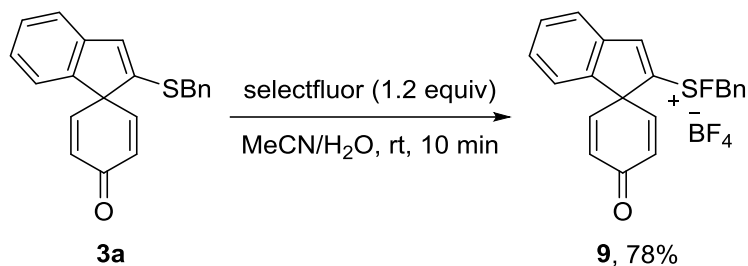

To a solution of **3a** (0.1 mmol, 31.6 mg) in MeCN (0.9 mL) and  $\text{H}_2\text{O}$  (90  $\mu\text{L}$ ) was added selectfluor (0.12 mmol, 42.5 mg), and the mixture was stirred at room temperature for 10 min. The progress of the reaction was monitored by TLC. Upon completion, the reaction was extracted with ethyl acetate for 3 times, dried over  $\text{MgSO}_4$  and concentrated under vacuum. The residue was purified by chromatography on silica gel (eluent: hexanes/ethyl acetate = 1/1) to afford the desired product **9** (32.9 mg, 78% yield). White solid (mp 196–197  $^\circ\text{C}$ ).  $^1\text{H}$  NMR (400 MHz,  $\text{CDCl}_3$ )  $\delta$  7.56 (s, 1H), 7.49 (d,  $J$  = 7.6 Hz, 1H), 7.44 – 7.39 (m, 1H), 7.37 – 7.32 (m, 4H), 7.24 – 7.20 (m, 2H), 7.15 (d,  $J$  = 7.6 Hz, 1H), 6.61 (d,  $J$  = 9.6 Hz, 1H), 6.53 – 6.47 (m, 2H), 6.25 (dd,  $J$  = 10.0, 2.8 Hz, 1H), 4.20 (d,  $J$  = 12.8 Hz, 1H), 4.04 (d,  $J$  = 12.8 Hz, 1H);  $^{13}\text{C}$  NMR (100 MHz,  $\text{CDCl}_3$ )  $\delta$  185.2, 150.2, 146.2, 145.1, 143.7, 141.2, 139.5, 131.6, 131.3, 130.4, 129.3, 129.1, 128.8, 128.6 (d,  $J$  = 5.0 Hz), 123.6 (d,  $J$  = 15.0 Hz), 61.7, 58.6;  $^{19}\text{F}$  NMR (376 MHz,  $\text{CDCl}_3$ )  $\delta$  -151.1, -151.0; IR (neat): 2923, 1623(s), 1621, 1455, 1397, 1048, 858, 767, 701, 616; HRESIMS Calcd for  $[\text{C}_{21}\text{H}_{16}\text{FOS}]^+$  ( $\text{M}^+$ ) 335.0900, found 335.0904.

### 2'-(benzylthio)spiro[cyclohexane-1,1'-inden]-4-one (**10**)

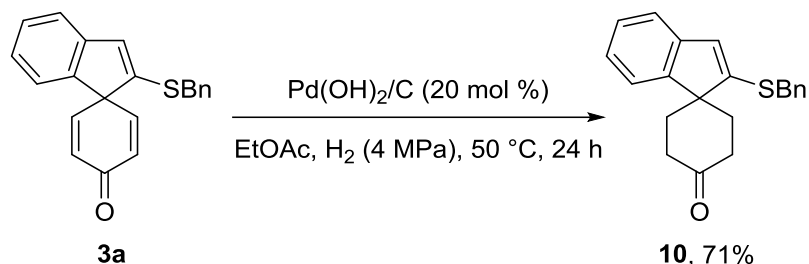

To a solution of **3a** (0.1 mmol, 32.6 mg) in ethyl acetate (1 mL) was added Pd(OH)<sub>2</sub> (10% on carbon, 0.02 mmol, 3 mg) and stirred at 50 °C under H<sub>2</sub> atmosphere (4 MPa) for 24 h. The progress of the reaction was monitored by TLC. Upon completion, the mixture was concentrated and the residue was purified by chromatography on silica gel (eluent: hexanes/ethyl acetate = 5/1) to afford the desired product **10** (23.4 mg, 71% yield). White solid (mp 109–111 °C). <sup>1</sup>H NMR (400 MHz, CDCl<sub>3</sub>) δ 7.49 (d, *J* = 7.6 Hz, 1H), 7.45 – 7.38 (m, 2H), 7.37 – 7.31 (m, 2H), 7.30 – 7.20 (m, 3H), 7.13 – 7.10 (m, 1H), 6.43 (s, 1H), 4.18 (s, 2H), 2.89 – 2.70 (m, 4H), 2.31 – 2.23 (m, 2H), 1.89 – 1.82 (m, 2H); <sup>13</sup>C NMR (100 MHz, CDCl<sub>3</sub>) δ 211.3, 153.4, 150.4, 142.7, 136.0, 128.8, 128.7, 127.6, 127.4, 123.7, 122.5, 121.9, 120.0, 53.9, 38.3, 37.5, 33.5; IR (neat): 2923, 1654(s), 1459, 1384, 1032, 897, 749, 787; HRESIMS Calcd for [C<sub>21</sub>H<sub>20</sub>NaOS]<sup>+</sup> (M + Na<sup>+</sup>) 343.1127, found 343.1138.

### References:

1. Y.-Q. Zhang, X.-Q. Zhu, Y.-B. Chen, T.-D. Tan, M.-Y. Yang and L.-W. Ye, *Org. Lett.*, 2018, **20**, 23, 7721.
2. Y.-Q. Zhang, Y.-B. Chen, J.-R. Liu, S.-Q. Wu, X.-Y. Fan, Z.-X. Zhang, X. Hong and L.-W. Ye, *Nat. Chem.*, 2021, **13**, 1093.

## 4. Crystal Data

Crystal data and structure refinement for **3i**. CCDC Number = 2243822

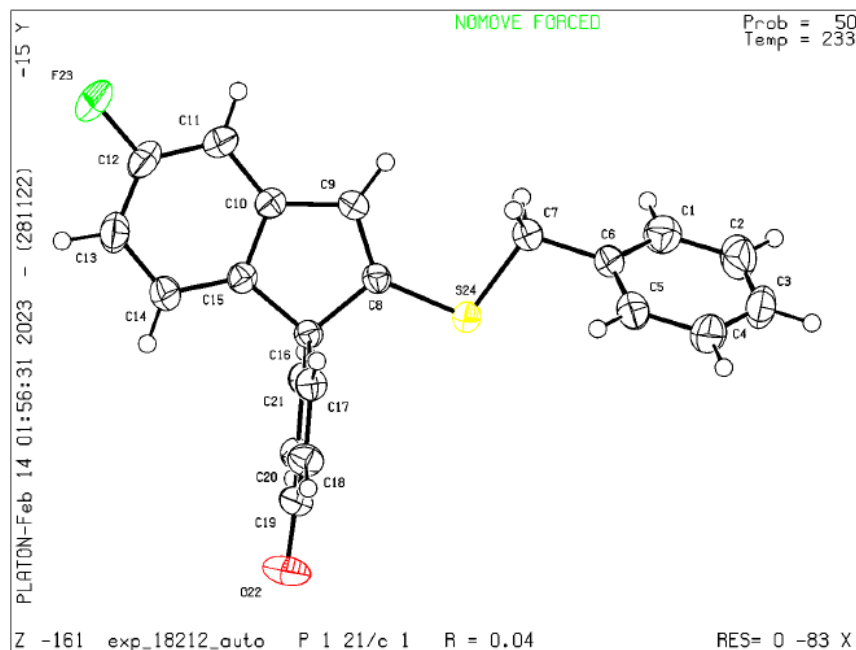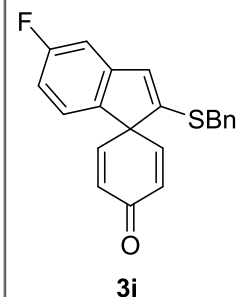

Bond precision: C-C = 0.0022 Å

Wavelength=1.54184

Cell: a=18.5422 (2)

b=9.4148 (1)

c=9.6744 (1)

alpha=90

beta=90.082 (1)

gamma=90

Temperature: 233 K

|                                     | Calculated                            | Reported                              |
|-------------------------------------|---------------------------------------|---------------------------------------|
| Volume                              | 1688.87 (3)                           | 1688.87 (3)                           |
| Space group                         | P 21/c                                | P 21/c 1                              |
| Hall group                          | -P 2ybc                               | -P 2ybc                               |
| Moiety formula                      | C <sub>21</sub> H <sub>15</sub> F O S | C <sub>21</sub> H <sub>15</sub> F O S |
| Sum formula                         | C <sub>21</sub> H <sub>15</sub> F O S | C <sub>21</sub> H <sub>15</sub> F O S |
| Mr                                  | 334.39                                | 334.39                                |
| D <sub>x</sub> , g cm <sup>-3</sup> | 1.315                                 | 1.315                                 |
| Z                                   | 4                                     | 4                                     |
| Mu (mm <sup>-1</sup> )              | 1.817                                 | 1.817                                 |
| F <sub>000</sub>                    | 696.0                                 | 696.0                                 |
| F <sub>000</sub> '                  | 699.27                                |                                       |
| h, k, l <sub>max</sub>              | 23, 11, 12                            | 22, 11, 11                            |
| N <sub>ref</sub>                    | 3427                                  | 3374                                  |
| T <sub>min</sub> , T <sub>max</sub> | 0.982, 0.982                          | 0.896, 1.000                          |
| T <sub>min</sub> '                  | 0.982                                 |                                       |

Correction method= # Reported T Limits: T<sub>min</sub>=0.896 T<sub>max</sub>=1.000

AbsCorr = MULTI-SCAN

Data completeness= 0.985

Theta(max)= 74.231

R(reflections)= 0.0436( 3020)

wR<sub>2</sub>(reflections)=  
0.1145( 3374)

S = 1.137

N<sub>par</sub>= 217

### Crystal data and structure refinement for 4. CCDC Number = 2243824

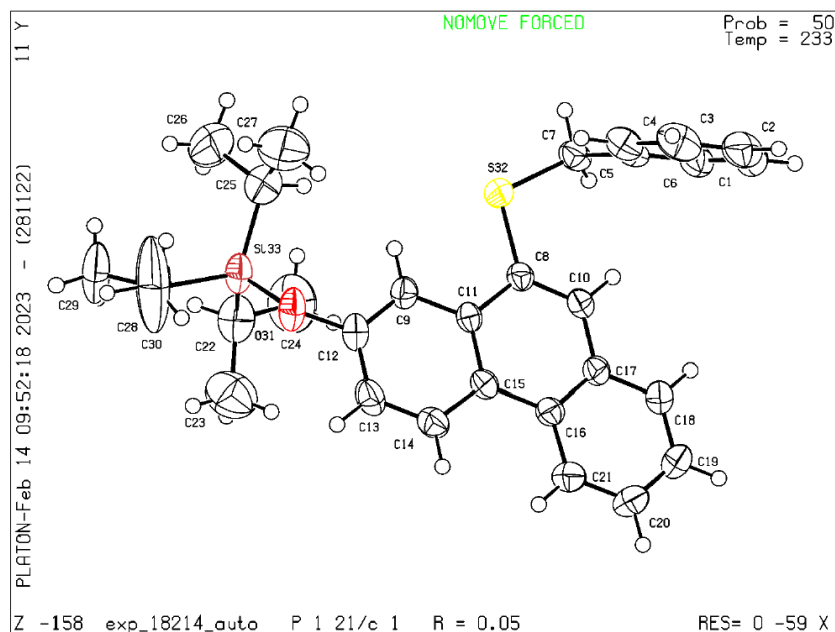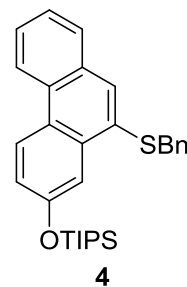

Bond precision: C-C = 0.0032 Å

Wavelength=1.54184

Cell: a=27.2173 (3)

b=10.9230 (2)

c=9.0261 (1)

alpha=90

beta=93.968 (1)

gamma=90

Temperature: 233 K

|                        | Calculated     | Reported       |
|------------------------|----------------|----------------|
| Volume                 | 2676.98 (6)    | 2676.98 (6)    |
| Space group            | P 21/c         | P 1 21/c 1     |
| Hall group             | -P 2ybc        | -P 2ybc        |
| Moiety formula         | C30 H35 O S Si | C30 H35 O S Si |
| Sum formula            | C30 H35 O S Si | C30 H35 O S Si |
| Mr                     | 471.73         | 471.73         |
| Dx, g cm <sup>-3</sup> | 1.171          | 1.170          |
| Z                      | 4              | 4              |
| Mu (mm <sup>-1</sup> ) | 1.638          | 1.638          |
| F000                   | 1012.0         | 1012.0         |
| F000'                  | 1016.61        |                |
| h, k, lmax             | 33, 13, 11     | 33, 13, 10     |
| Nref                   | 5466           | 5296           |
| Tmin, Tmax             | 0.984, 0.984   | 0.784, 1.000   |
| Tmin'                  | 0.984          |                |

Correction method= # Reported T Limits: Tmin=0.784 Tmax=1.000

AbsCorr = MULTI-SCAN

Data completeness= 0.969

Theta(max)= 74.321

R(reflections)= 0.0464 ( 4430)

wR2(reflections)=  
0.1312 ( 5296)

S = 1.046

Npar= 304

## Crystal data and structure refinement for 9. CCDC Number = 2253023

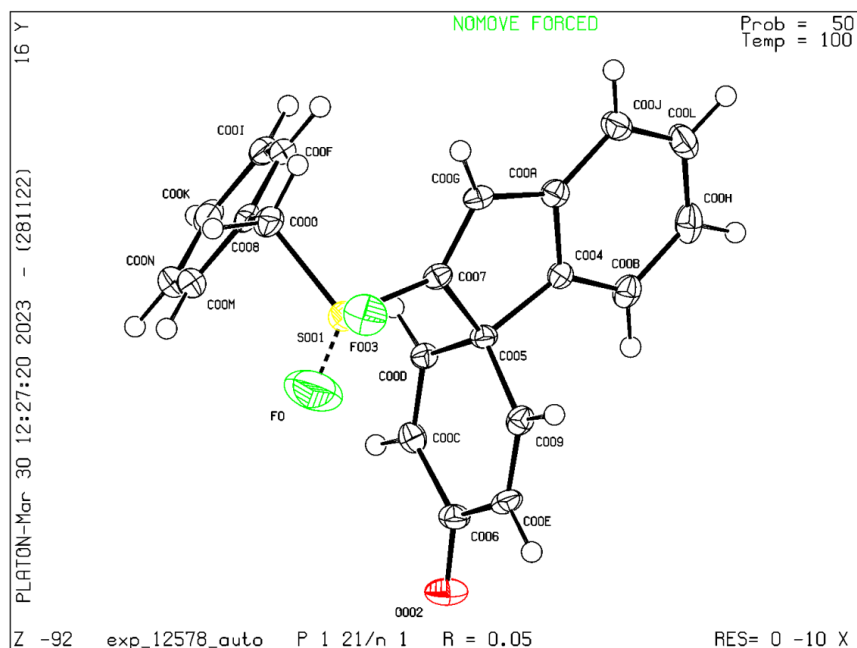

Bond precision: C-C = 0.0040 Å

Wavelength=1.54184

Cell: a=9.2311 (1)  
alpha=90

b=18.8323 (3)  
beta=94.465 (1)

c=9.3096 (1)  
gamma=90

Temperature: 100 K

|                        | Calculated                            | Reported                              |
|------------------------|---------------------------------------|---------------------------------------|
| Volume                 | 1613.50 (4)                           | 1613.50 (4)                           |
| Space group            | P 21/n                                | P 21/n 1                              |
| Hall group             | -P 2yn                                | -P 2yn                                |
| Moiety formula         | C <sub>21</sub> H <sub>16</sub> F O S | C <sub>21</sub> H <sub>16</sub> F O S |
| Sum formula            | C <sub>21</sub> H <sub>16</sub> F O S | C <sub>21</sub> H <sub>16</sub> F O S |
| Mr                     | 335.40                                | 335.40                                |
| Dx, g cm <sup>-3</sup> | 1.381                                 | 1.381                                 |
| Z                      | 4                                     | 4                                     |
| Mu (mm <sup>-1</sup> ) | 1.902                                 | 1.902                                 |
| F <sub>000</sub>       | 700.0                                 | 700.0                                 |
| F <sub>000</sub> '     | 703.27                                |                                       |
| h, k, lmax             | 10, 22, 11                            | 10, 22, 11                            |
| Nref                   | 2836                                  | 2819                                  |
| Tmin, Tmax             | 0.892, 0.909                          | 0.775, 1.000                          |
| Tmin'                  | 0.827                                 |                                       |

Correction method= # Reported T Limits: Tmin=0.775 Tmax=1.000  
 AbsCorr = MULTI-SCAN

Data completeness= 0.994

Theta(max) = 66.596

R(reflections)= 0.0522 ( 2712)

wR2(reflections)=  
0.1269 ( 2819)

S = 1.202

Npar= 227

## 5. HPLC Chromatograms

Compound **3j**: HPLC (IC, *n*-hexane/2-propanol = 90/10,  $v = 1.0$  mL/min,  $\lambda = 254$  nm)

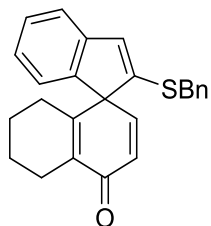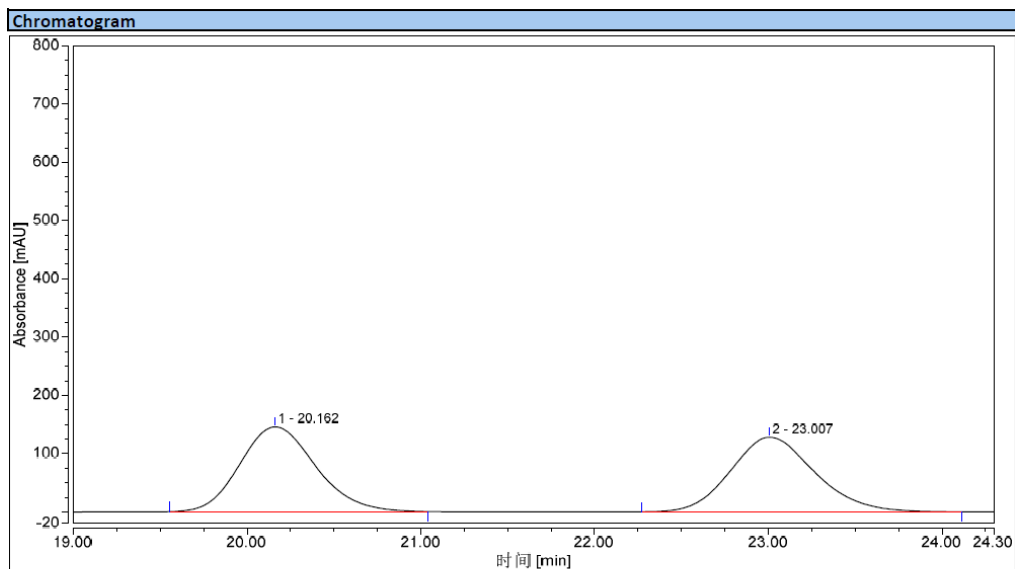

**Integration Results**

| No.           | Peak Name | Retention Time<br>min | Area<br>mAU*min | Height<br>mAU  | Relative Area<br>% | Relative Height<br>% | Amount<br>n.a. |
|---------------|-----------|-----------------------|-----------------|----------------|--------------------|----------------------|----------------|
| 1             |           | 20.162                | 73.395          | 145.357        | 50.60              | 53.23                | n.a.           |
| 2             |           | 23.007                | 71.668          | 127.736        | 49.40              | 46.77                | n.a.           |
| <b>Total:</b> |           |                       | <b>145.064</b>  | <b>273.093</b> | <b>100.00</b>      | <b>100.00</b>        |                |

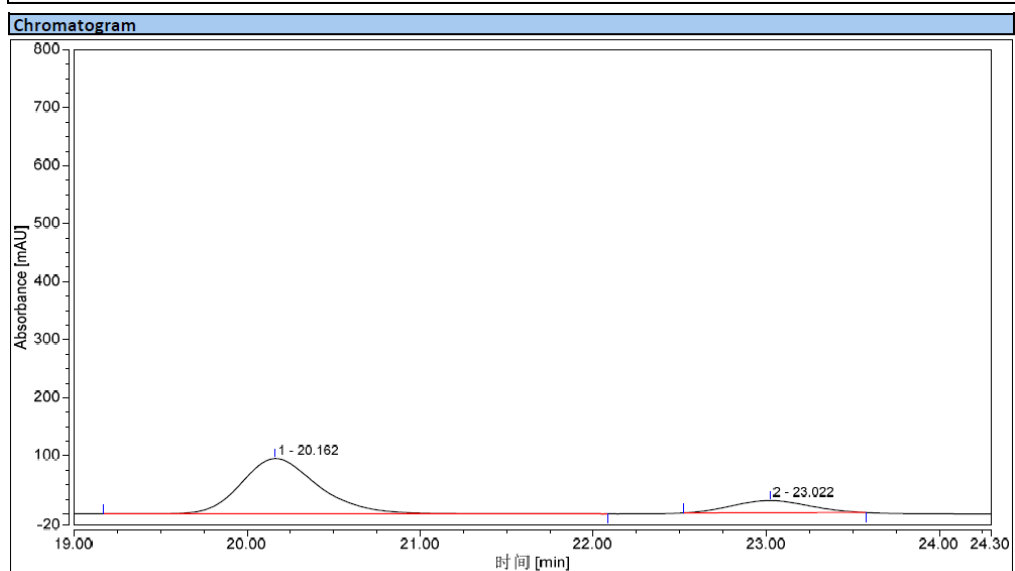

**Integration Results**

| No.           | Peak Name | Retention Time<br>min | Area<br>mAU*min | Height<br>mAU  | Relative Area<br>% | Relative Height<br>% | Amount<br>n.a. |
|---------------|-----------|-----------------------|-----------------|----------------|--------------------|----------------------|----------------|
| 1             |           | 20.162                | 48.796          | 94.920         | 82.00              | 81.93                | n.a.           |
| 2             |           | 23.022                | 10.709          | 20.941         | 18.00              | 18.07                | n.a.           |
| <b>Total:</b> |           |                       | <b>59.506</b>   | <b>115.861</b> | <b>100.00</b>      | <b>100.00</b>        |                |

7.430  
7.424  
7.414  
7.409  
7.402  
7.315  
7.312  
7.302  
7.299  
7.287  
7.274  
7.269  
7.264  
7.237  
7.225  
7.219  
7.196  
6.860  
6.852  
6.831  
6.823

| Parameter                | Value               |
|--------------------------|---------------------|
| 1 Title                  | 1a-H-fxy-2-134-H    |
| 2 Origin                 | Bruker BioSpin GmbH |
| 3 Solvent                | CDCl3               |
| 4 Temperature            | 298.0               |
| 5 Number of Scans        | 5                   |
| 6 Acquisition Time       | 4.0894              |
| 7 Acquisition Date       | 2020-06-19T20:26:04 |
| 8 Spectrometer Frequency | 400.13              |
| 9 Spectral Width         | 8012.8              |

5.085

3.880

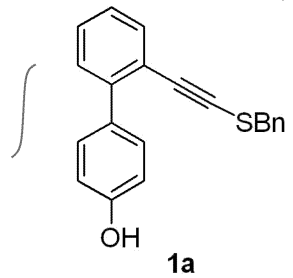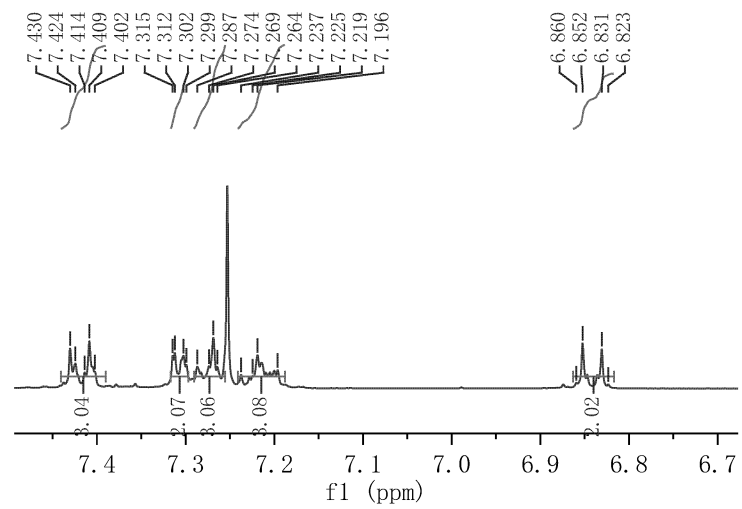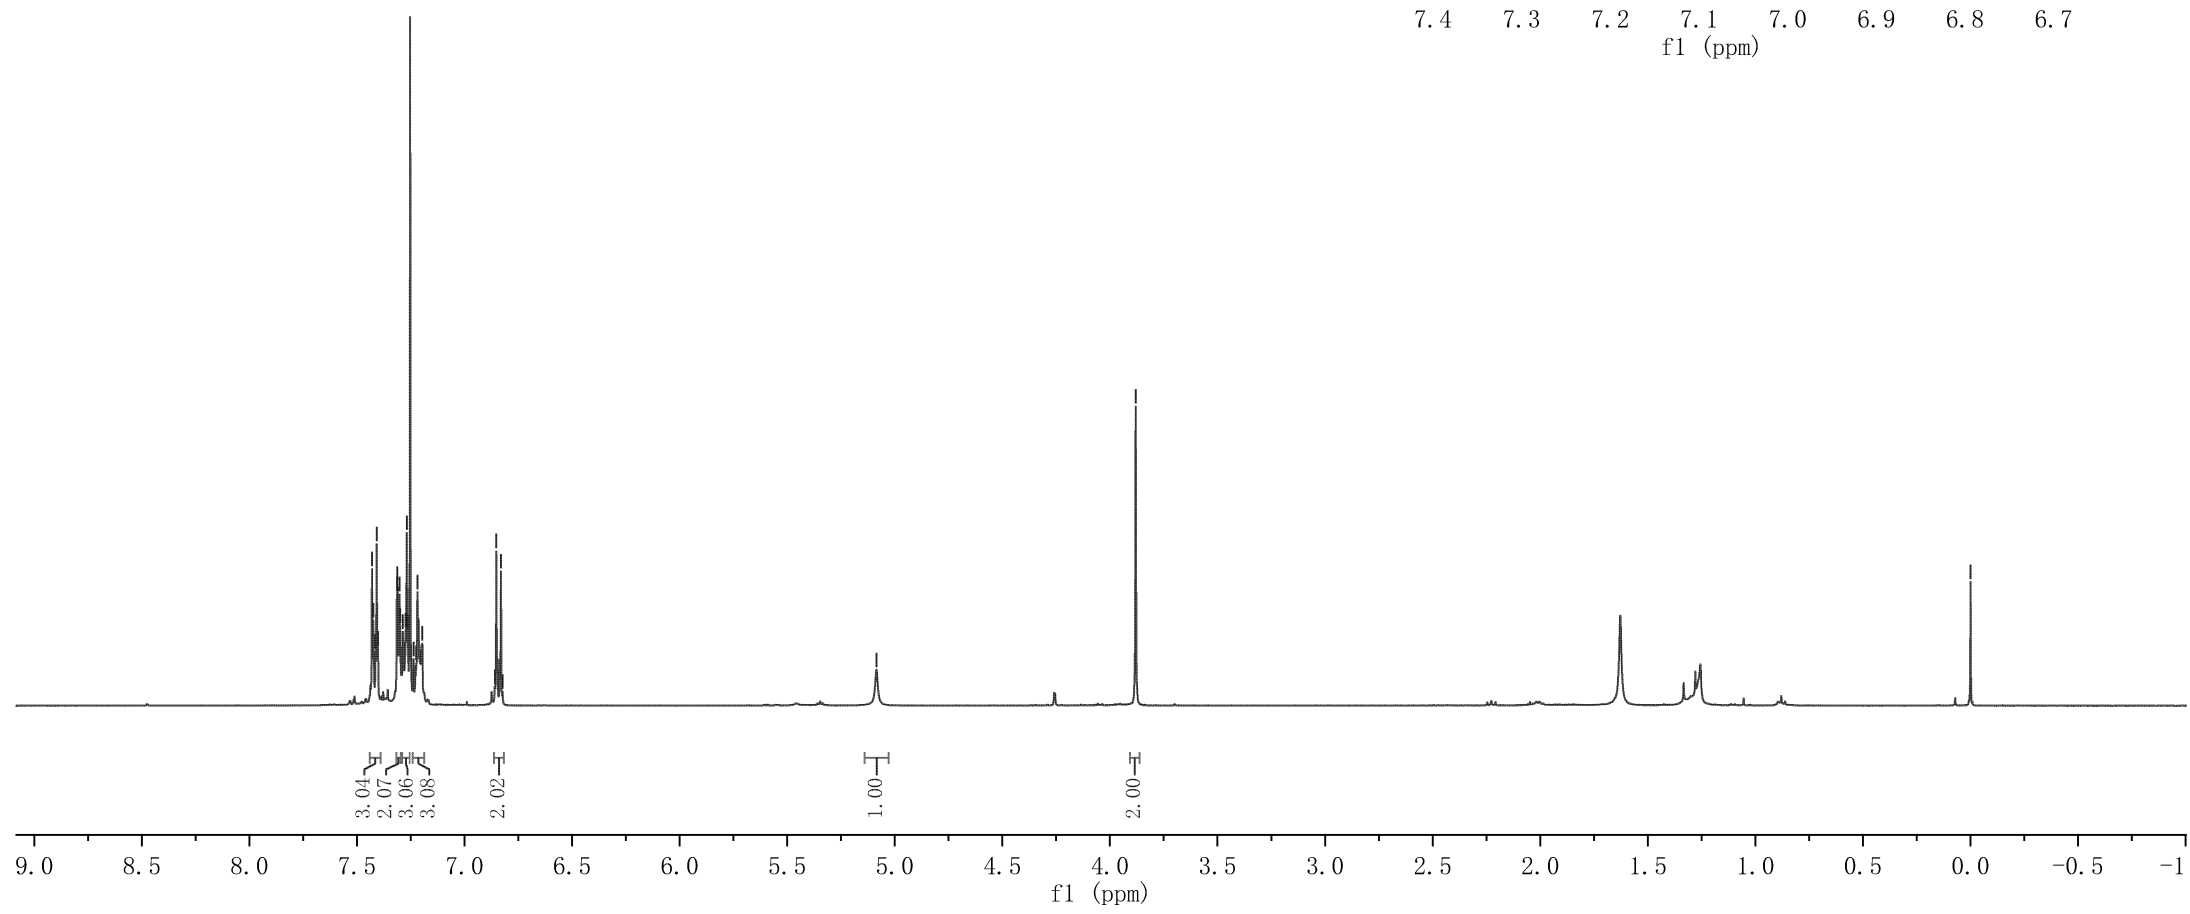



| Parameter                | Value               |
|--------------------------|---------------------|
| 1 Title                  | 1a-C-fxy-2-134-C    |
| 2 Origin                 | Bruker BioSpin GmbH |
| 3 Solvent                | CDC13               |
| 4 Temperature            | 300.0               |
| 5 Number of Scans        | 80                  |
| 6 Acquisition Time       | 1.3631              |
| 7 Acquisition Date       | 2020-06-19T20:27:09 |
| 8 Spectrometer Frequency | 100.61              |
| 9 Spectral Width         | 24038.5             |

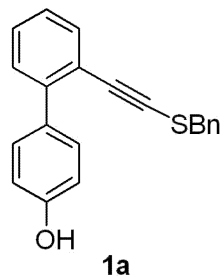

155.16 142.94 130.53 129.25 128.94 128.53 128.13 127.63 126.55 114.84 94.44 81.83 77.32 77.00 76.68 40.29

142.94 136.75 133.13 132.70 130.53 129.25 128.94 128.53 128.13 127.63 126.55

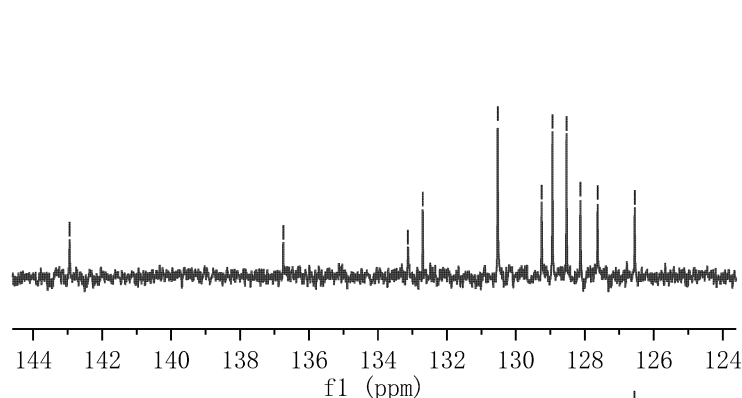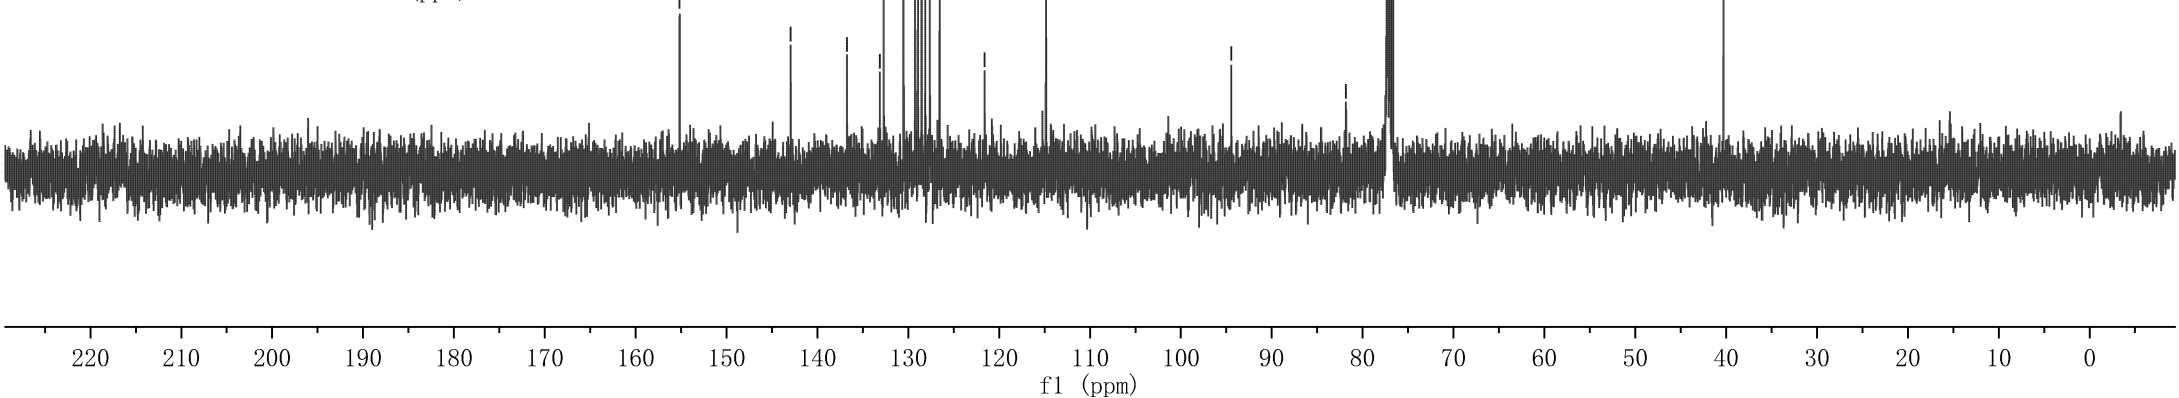

7.487  
7.485  
7.482  
7.466  
7.464  
7.457  
7.452  
7.440  
7.435  
7.305  
7.301  
7.269  
7.265  
7.230  
7.217  
7.201  
7.195  
6.891  
6.883  
6.862  
6.855

— 5.124

2.684  
2.666  
2.648  
2.630

1.279  
1.261  
1.243

— 0.000

| Parameter                | Value               |
|--------------------------|---------------------|
| 1 Title                  | 1b-Hfxy-4-242-hex-H |
| 2 Origin                 | Bruker BioSpin GmbH |
| 3 Solvent                | CDCl3               |
| 4 Temperature            | 298.0               |
| 5 Number of Scans        | 7                   |
| 6 Acquisition Time       | 4.0894              |
| 7 Acquisition Date       | 2021-05-20T16:04:12 |
| 8 Spectrometer Frequency | 400.13              |
| 9 Spectral Width         | 8012.8              |

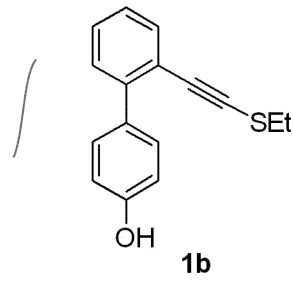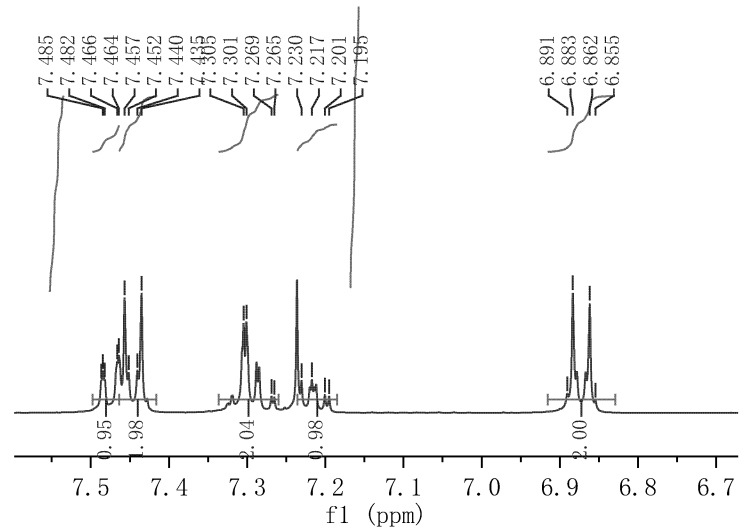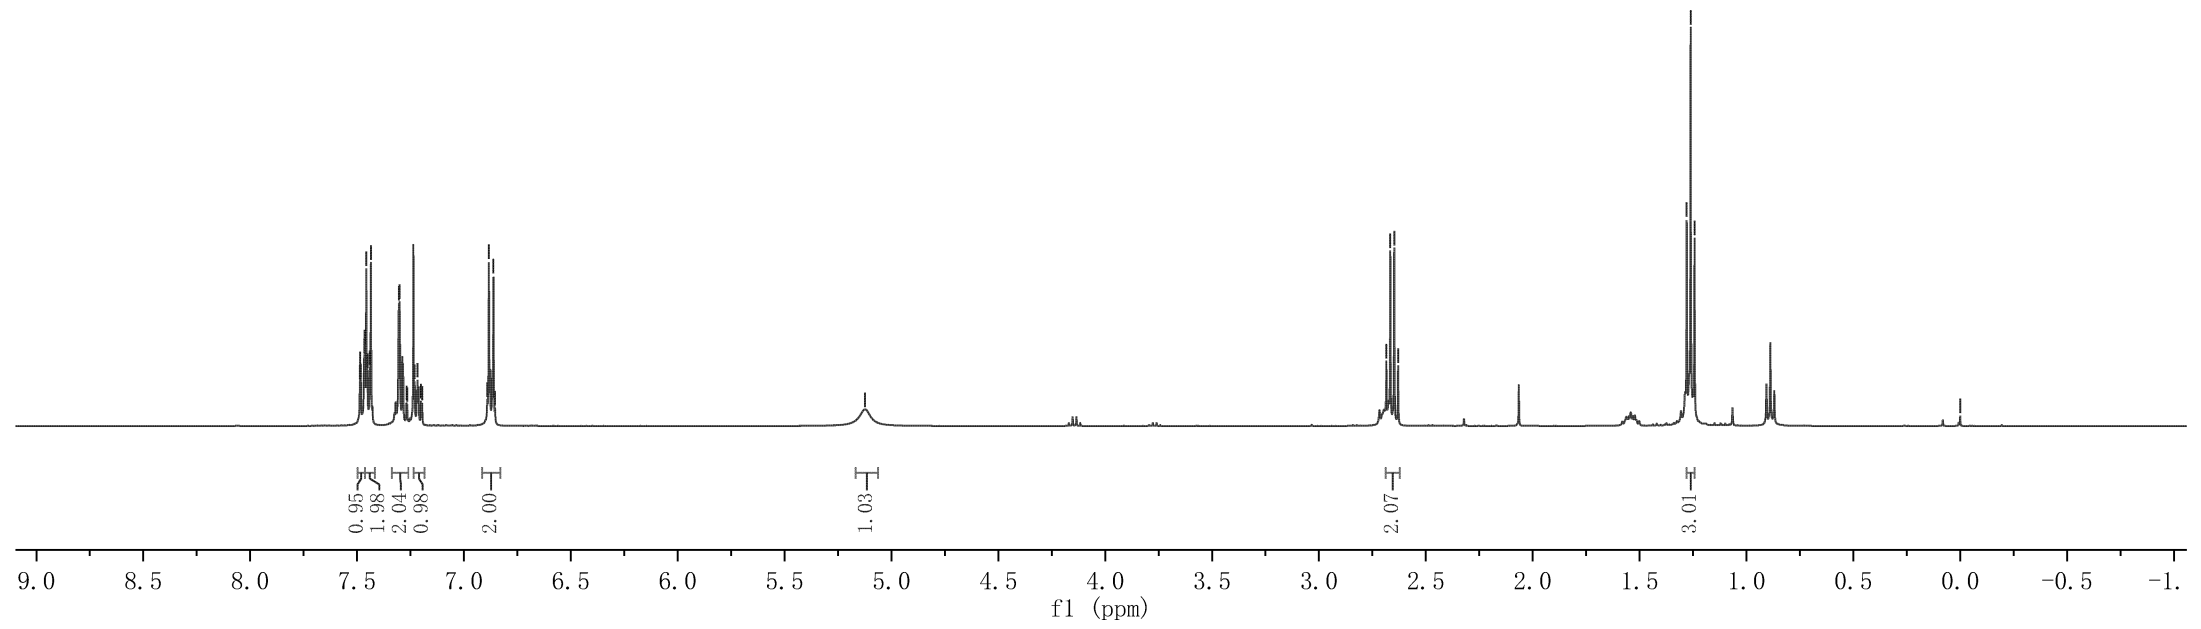

| Parameter                | Value                |
|--------------------------|----------------------|
| 1 Title                  | 1b-cfxy-4-242-hex-CC |
| 2 Origin                 | Bruker BioSpin GmbH  |
| 3 Solvent                | CDC13                |
| 4 Temperature            | 300.0                |
| 5 Number of Scans        | 18                   |
| 6 Acquisition Time       | 1.3631               |
| 7 Acquisition Date       | 2021-05-20T16:05:29  |
| 8 Spectrometer Frequency | 100.61               |
| 9 Spectral Width         | 24038.5              |

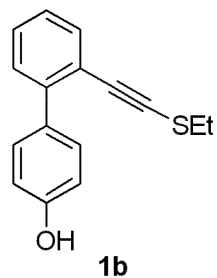

— 155.45      — 142.94      132.87      132.41      130.46      129.21      127.91      126.50      121.76      — 114.95  
 — 93.52      81.94      77.32      77.00      76.68      — 29.80      — 14.70

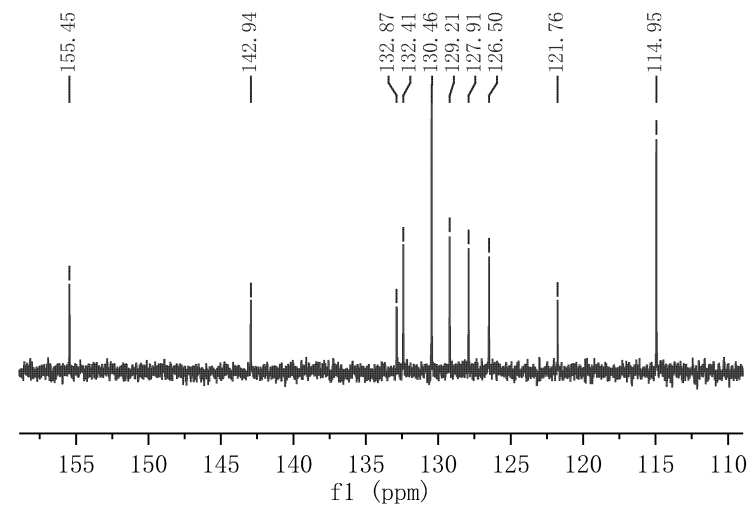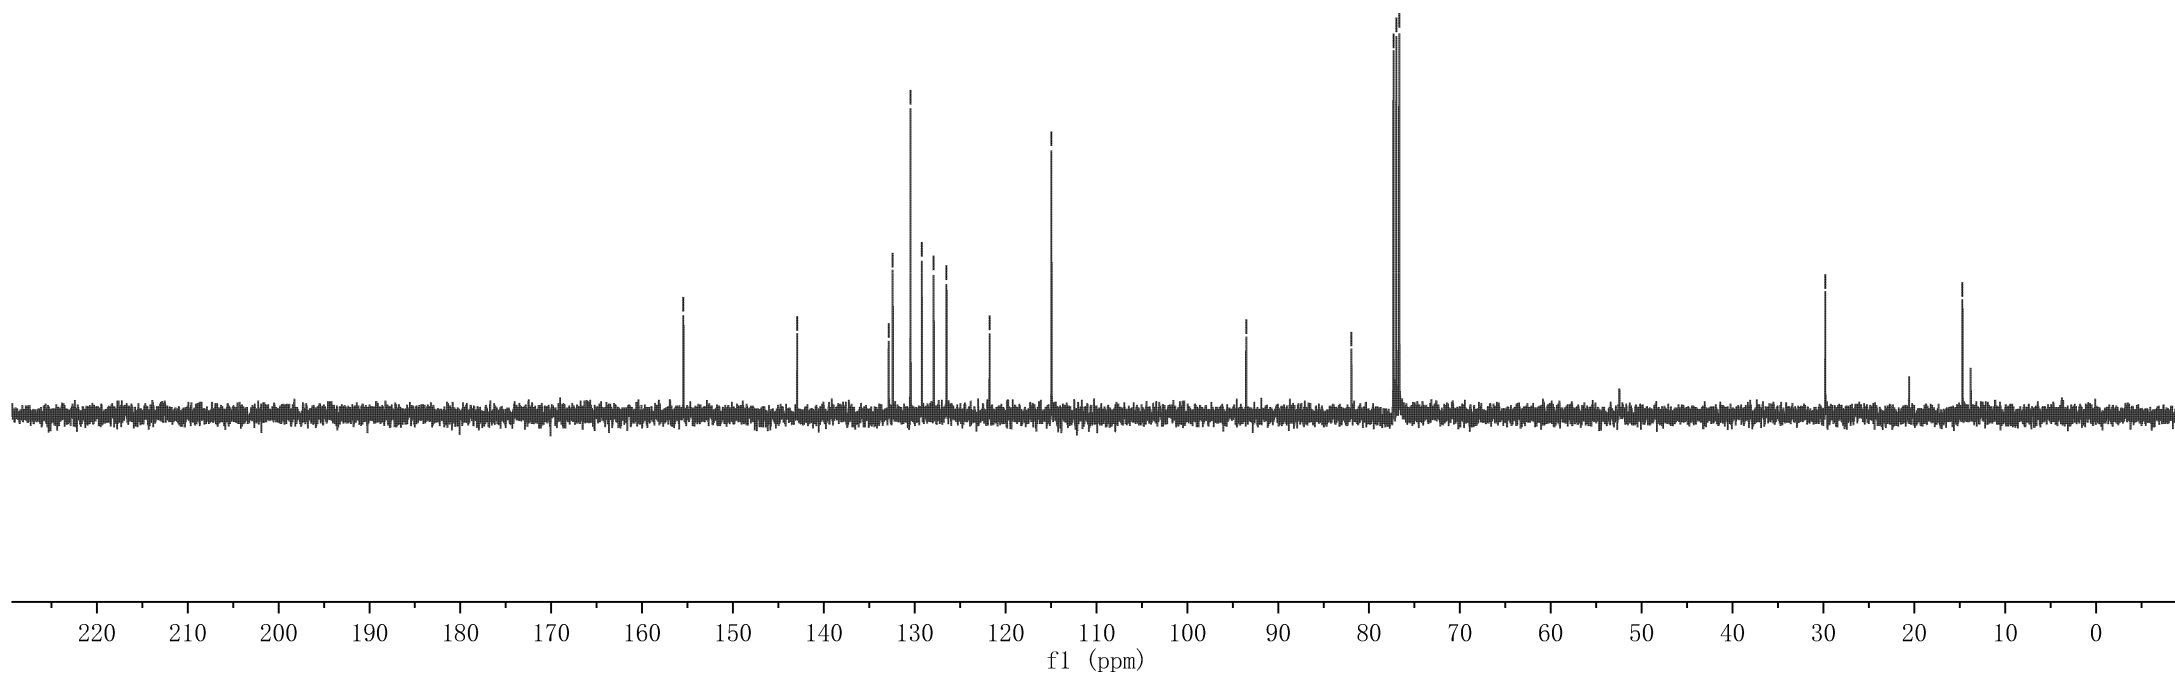

| Parameter                | Value               |
|--------------------------|---------------------|
| 1 Title                  | 1c-H-fxy-4-244-new  |
| 2 Origin                 | Brüker BioSpin GmbH |
| 3 Solvent                | CDCl <sub>3</sub>   |
| 4 Temperature            | 298.0               |
| 5 Number of Scans        | 43                  |
| 6 Acquisition Time       | 4.0894              |
| 7 Acquisition Date       | 2021-05-21T10:03:23 |
| 8 Spectrometer Frequency | 400.13              |
| 9 Spectral Width         | 8012.8              |

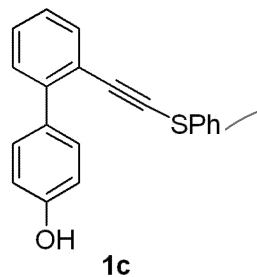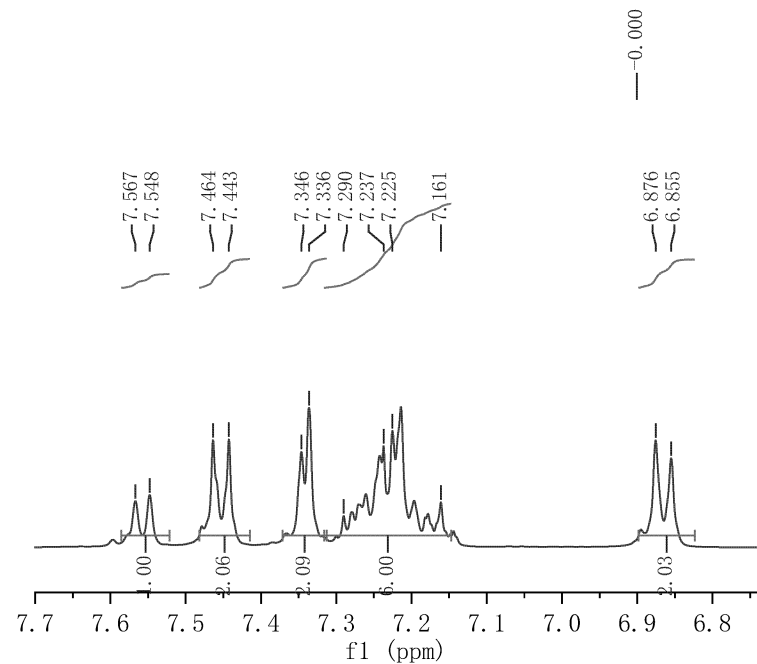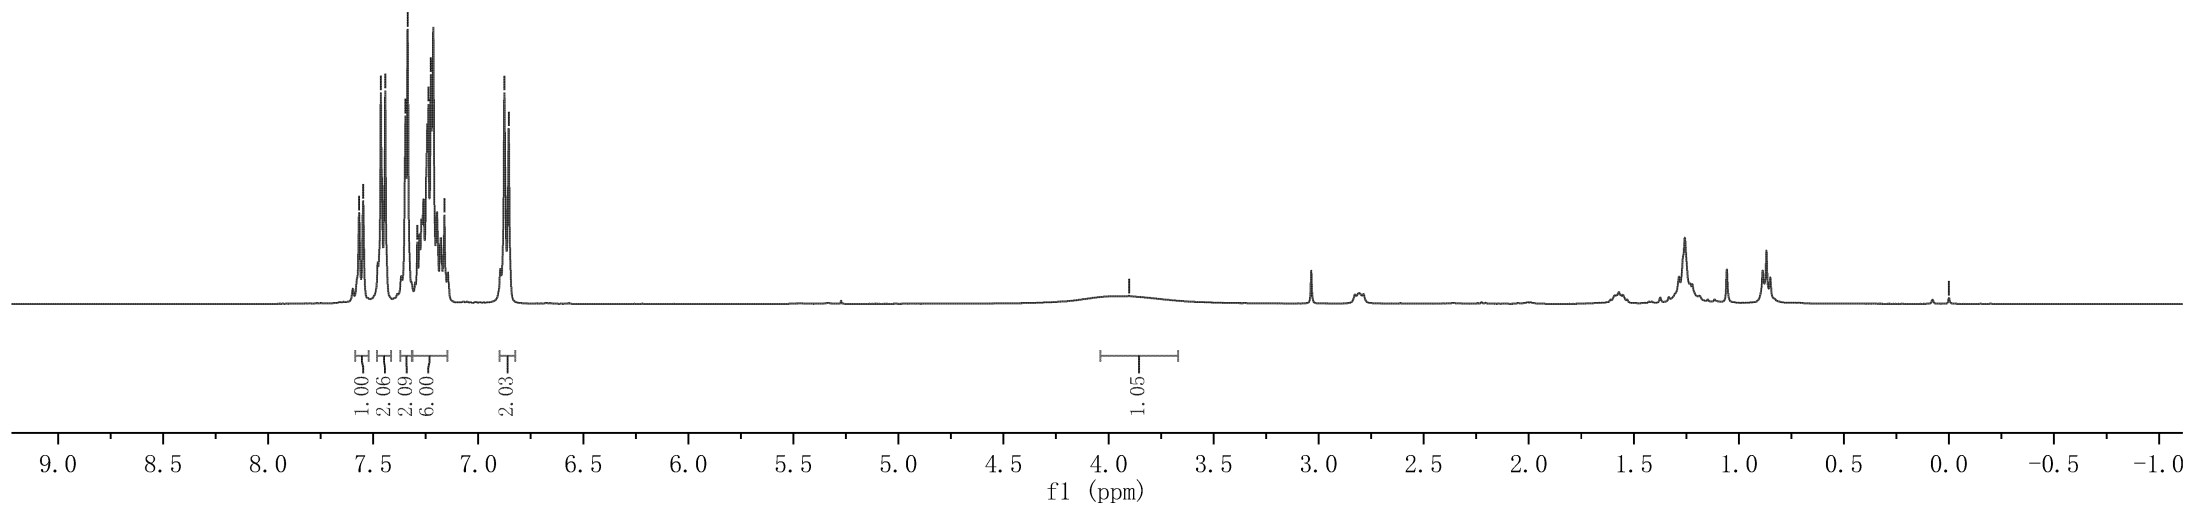

| Parameter                | Value                |
|--------------------------|----------------------|
| 1 Title                  | 1c-C-fxy-4-244-new-C |
| 2 Origin                 | Bruker BioSpin GmbH  |
| 3 Solvent                | CDC13                |
| 4 Temperature            | 300.0                |
| 5 Number of Scans        | 37                   |
| 6 Acquisition Time       | 1.3631               |
| 7 Acquisition Date       | 2021-05-21T10:07:21  |
| 8 Spectrometer Frequency | 100.61               |
| 9 Spectral Width         | 24038.5              |

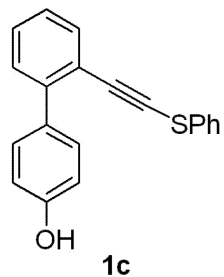

155.29  
 143.21  
 133.05  
 132.49  
 130.54  
 129.38  
 129.09  
 128.42  
 126.69  
 126.33  
 126.10  
 121.44  
 115.08  
 98.04  
 77.94  
 77.32  
 77.00  
 76.68

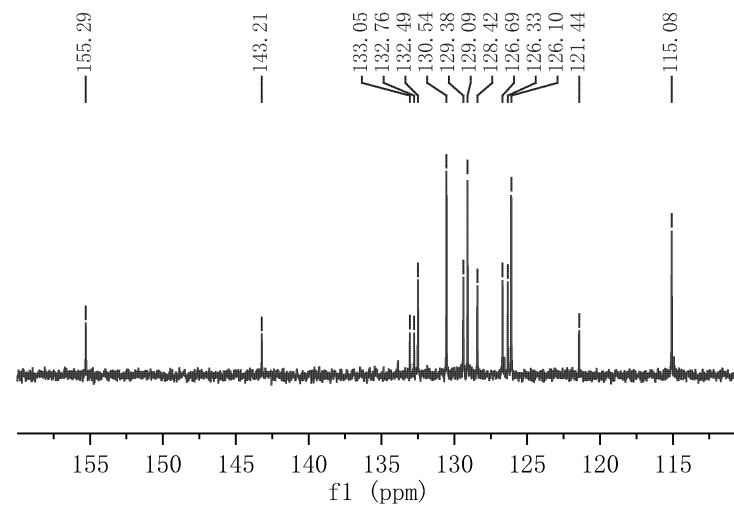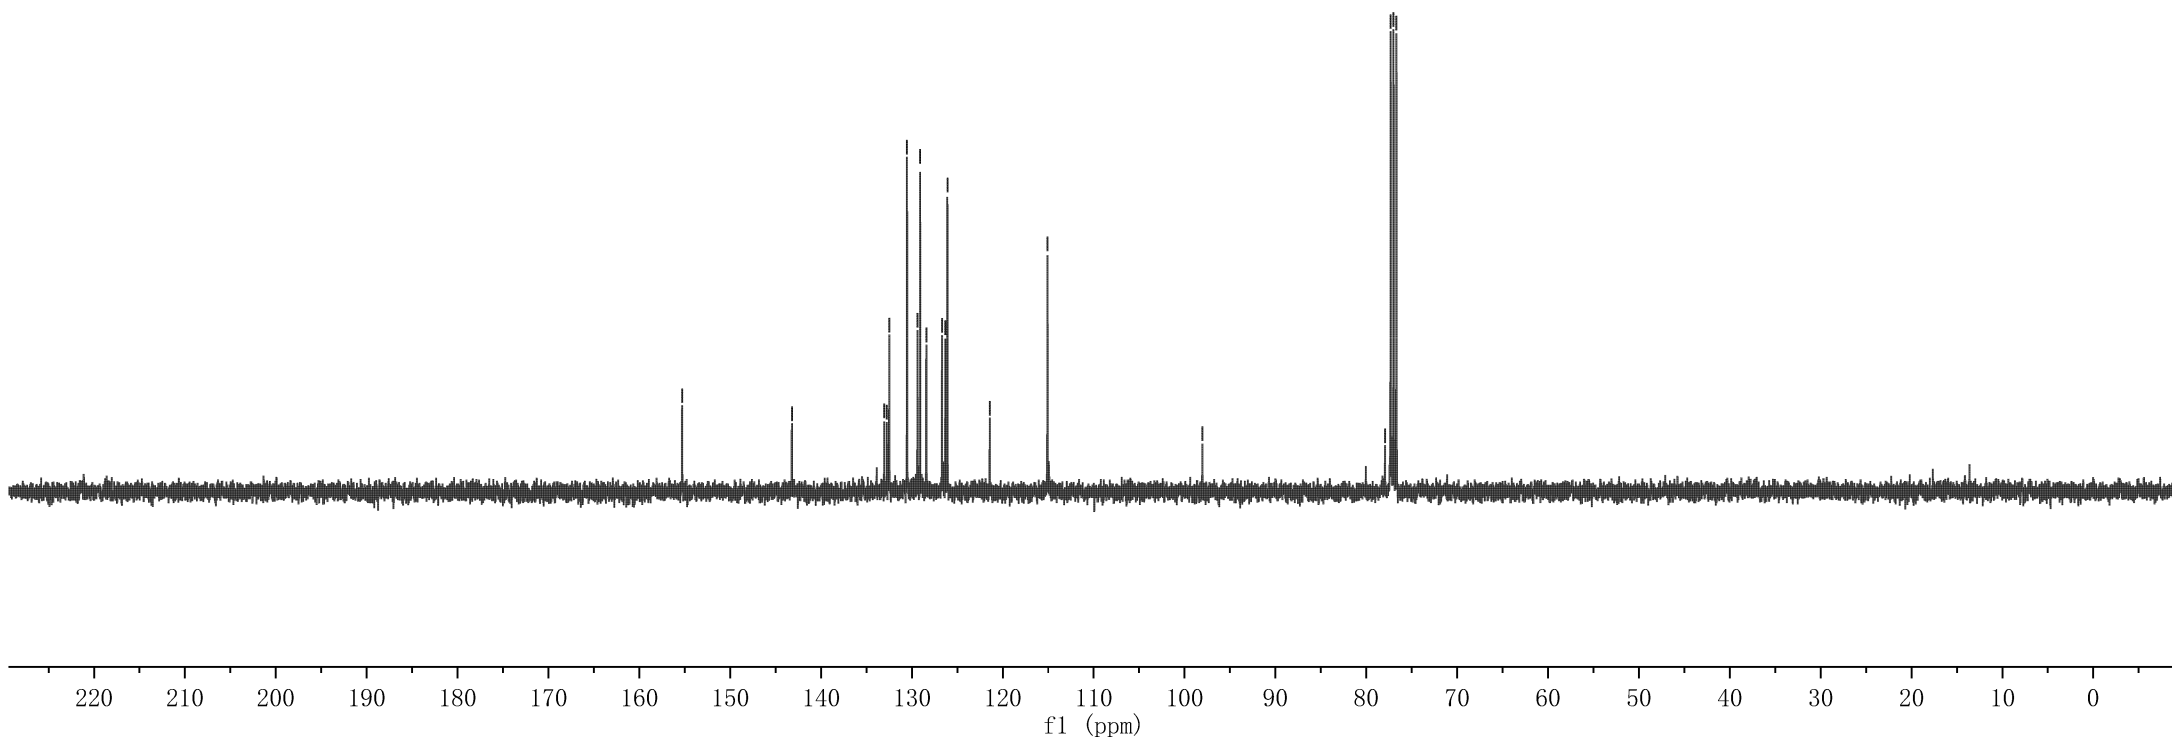

| Parameter                | Value               |
|--------------------------|---------------------|
| 1 Title                  | 1d-H-FXY-2-205      |
| 2 Origin                 | Brüker BioSpin GmbH |
| 3 Solvent                | CDCl <sub>3</sub>   |
| 4 Temperature            | 298.0               |
| 5 Number of Scans        | 8                   |
| 6 Acquisition Time       | 4.0894              |
| 7 Acquisition Date       | 2020-07-14T09:38:07 |
| 8 Spectrometer Frequency | 400.13              |
| 9 Spectral Width         | 8012.8              |

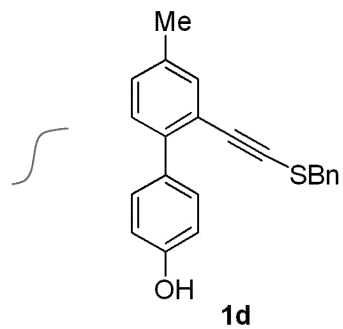

7.409  
7.402  
7.381  
7.374  
7.274  
7.256  
7.252  
7.230  
7.207  
7.203  
7.197  
7.187  
7.120  
7.117  
7.100  
7.097  
6.834  
6.827  
6.806  
6.798

5.232

3.864

2.314

0.000

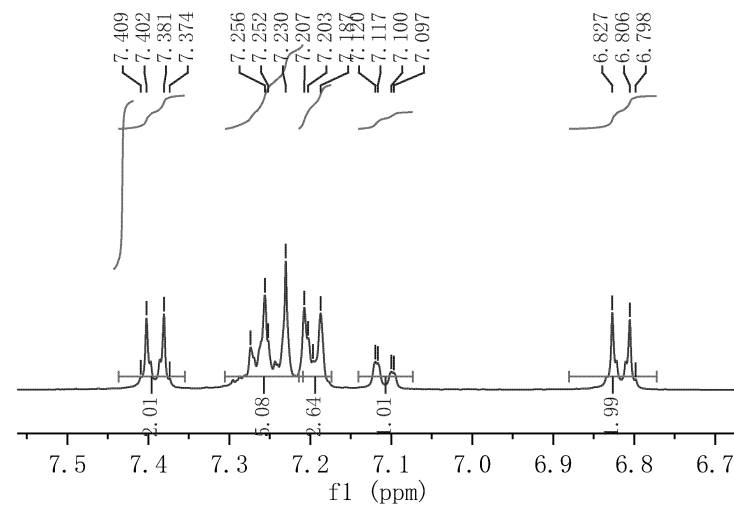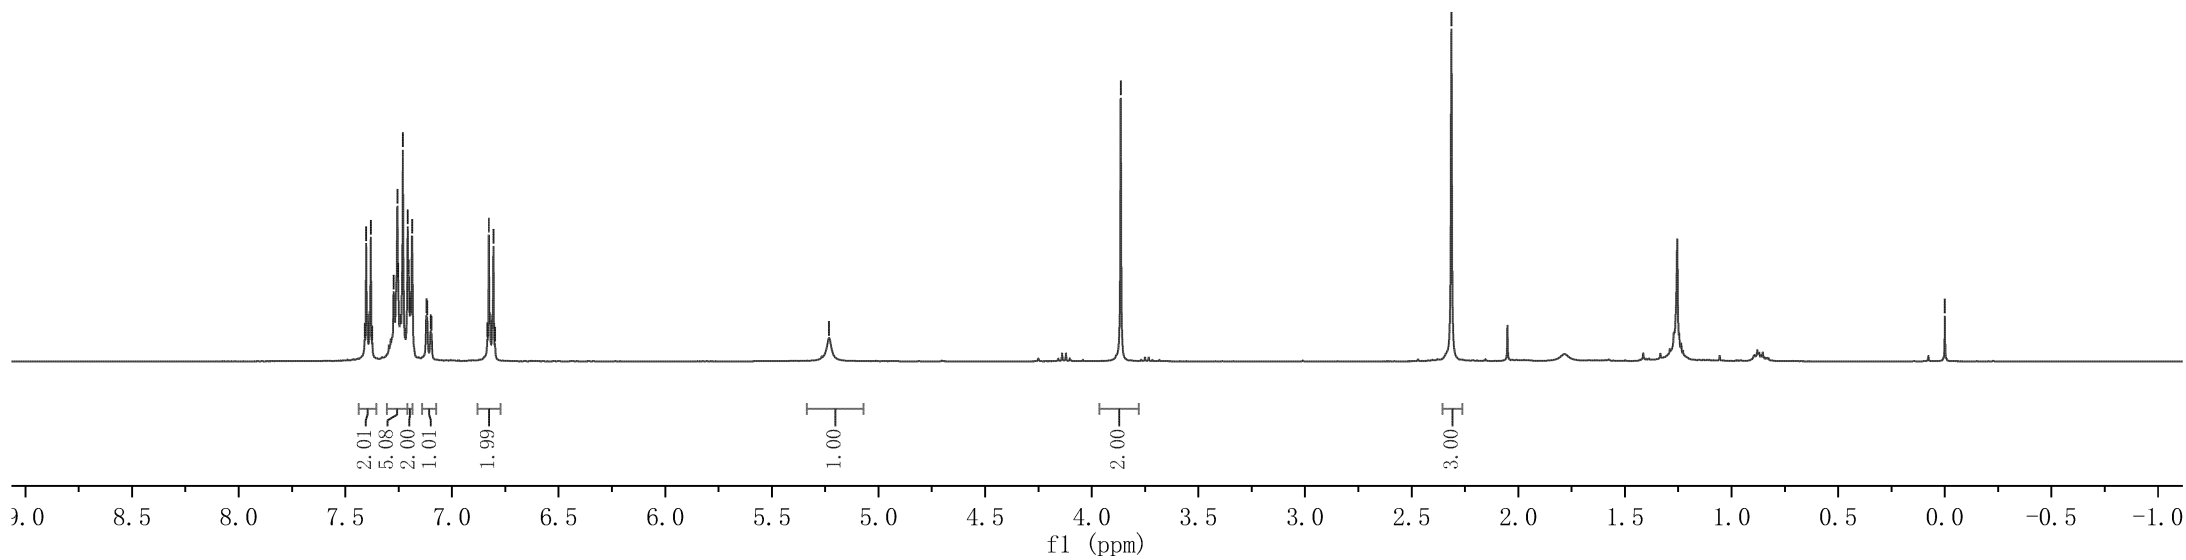

| Parameter                | Value               |
|--------------------------|---------------------|
| 1 Title                  | 1d-C-FXY-2-205-C-2  |
| 2 Origin                 | Bruker BioSpin GmbH |
| 3 Solvent                | CDC13               |
| 4 Temperature            | 300.0               |
| 5 Number of Scans        | 18                  |
| 6 Acquisition Time       | 1.3631              |
| 7 Acquisition Date       | 2020-07-14T09:41:25 |
| 8 Spectrometer Frequency | 100.61              |
| 9 Spectral Width         | 24038.5             |

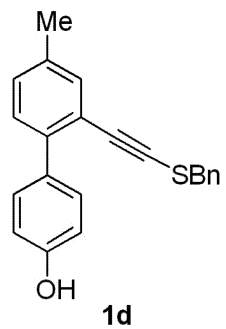

154.93  
 140.14  
 136.74  
 136.23  
 133.18  
 133.02  
 130.44  
 129.13  
 128.93  
 128.50  
 127.59  
 121.25  
 114.80

94.62

81.32  
 77.32  
 77.00  
 76.68

40.25

20.73

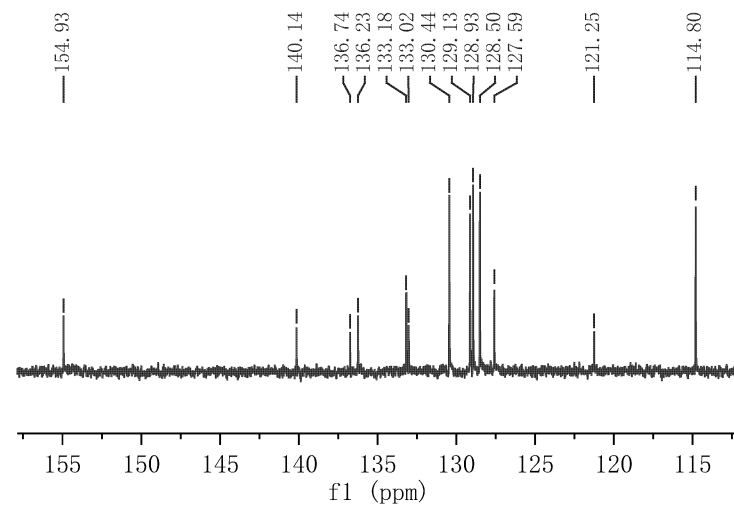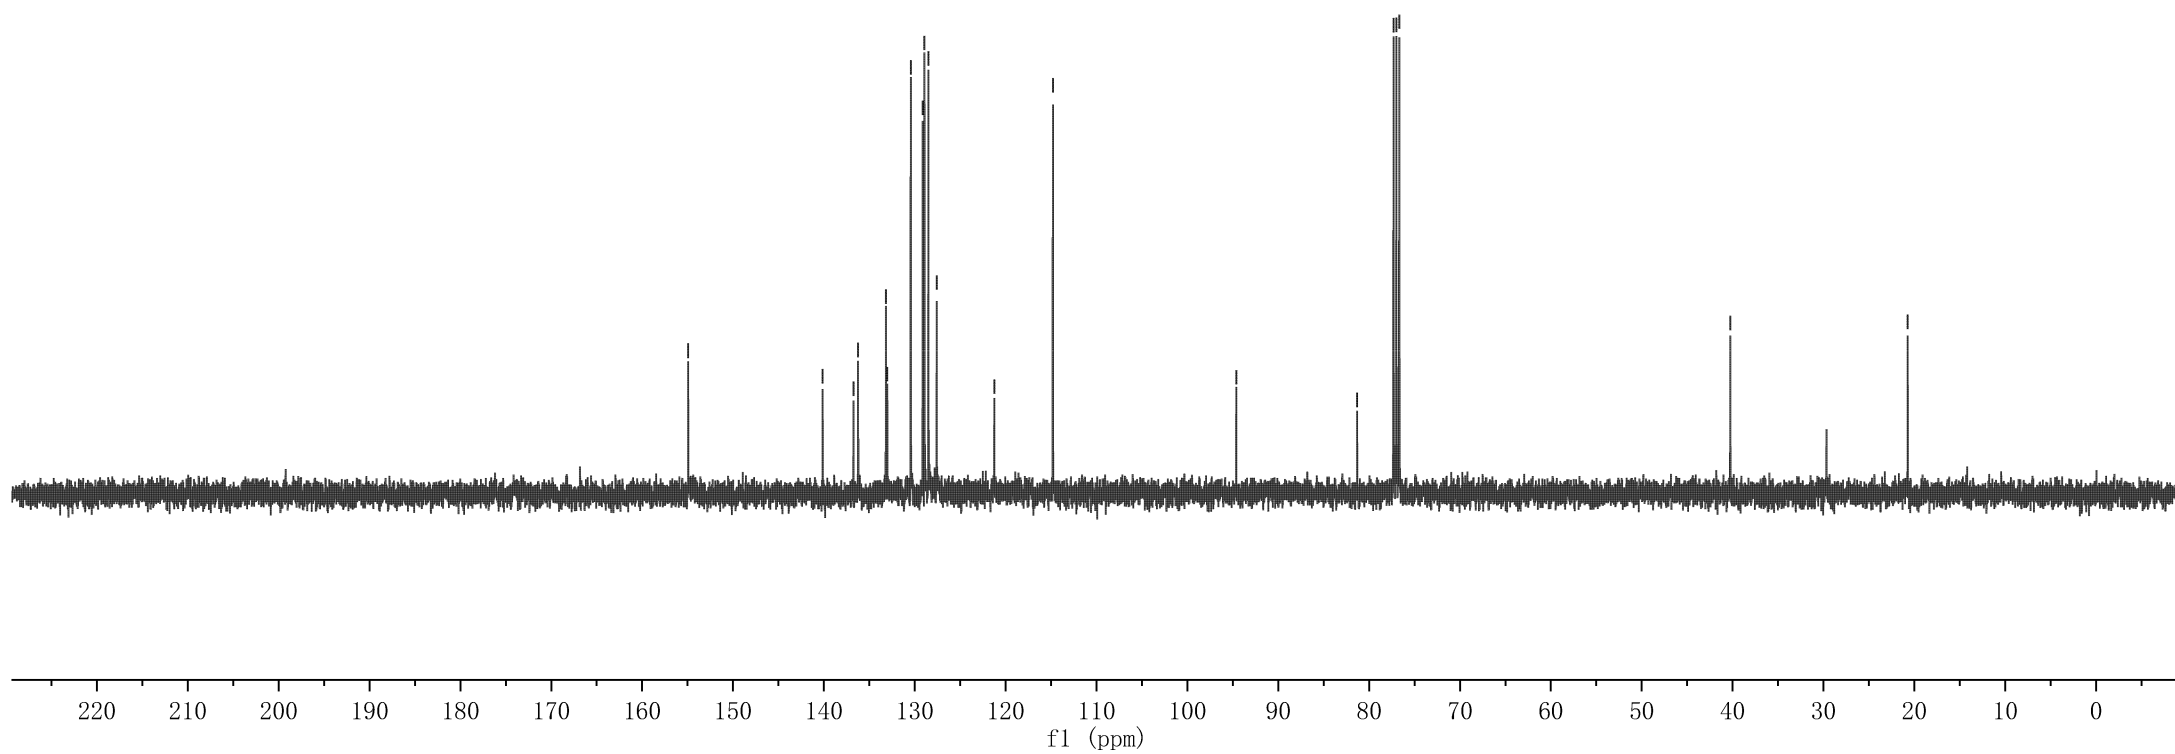

| Parameter                | Value               |
|--------------------------|---------------------|
| 1 Title                  | 1e-H                |
| 2 Origin                 |                     |
| 3 Solvent                | CDCl3               |
| 4 Temperature            | 297.8               |
| 5 Number of Scans        | 50                  |
| 6 Acquisition Time       | 4.0002              |
| 7 Acquisition Date       | 2023-02-08T14:50:35 |
| 8 Spectrometer Frequency | 399.90              |
| 9 Spectral Width         | 8012.0              |

7.414  
7.409  
7.397  
7.392  
7.330  
7.310  
7.281  
7.263  
7.259  
7.249  
7.219  
7.214  
7.200  
7.196  
7.128  
7.047  
7.044  
7.027  
7.024  
6.835  
6.830  
6.817  
6.813

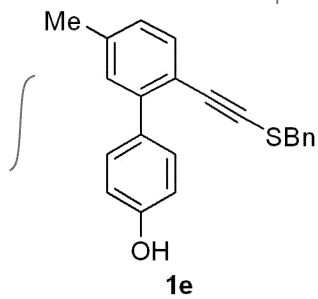

5.052

3.870

2.359

0.000

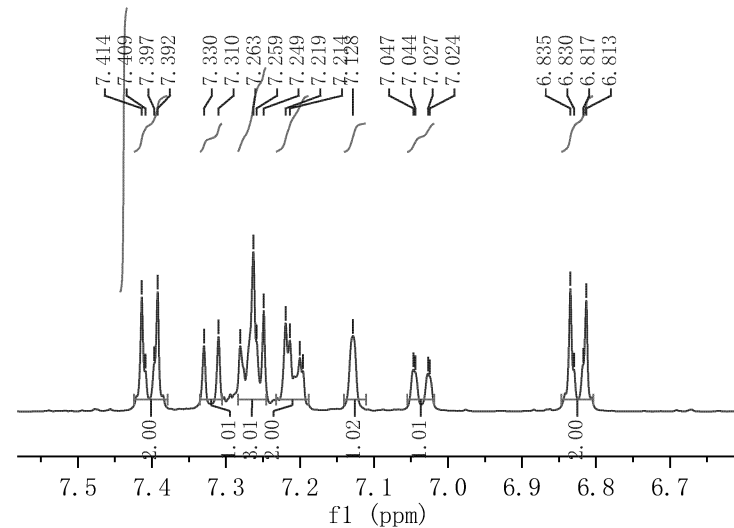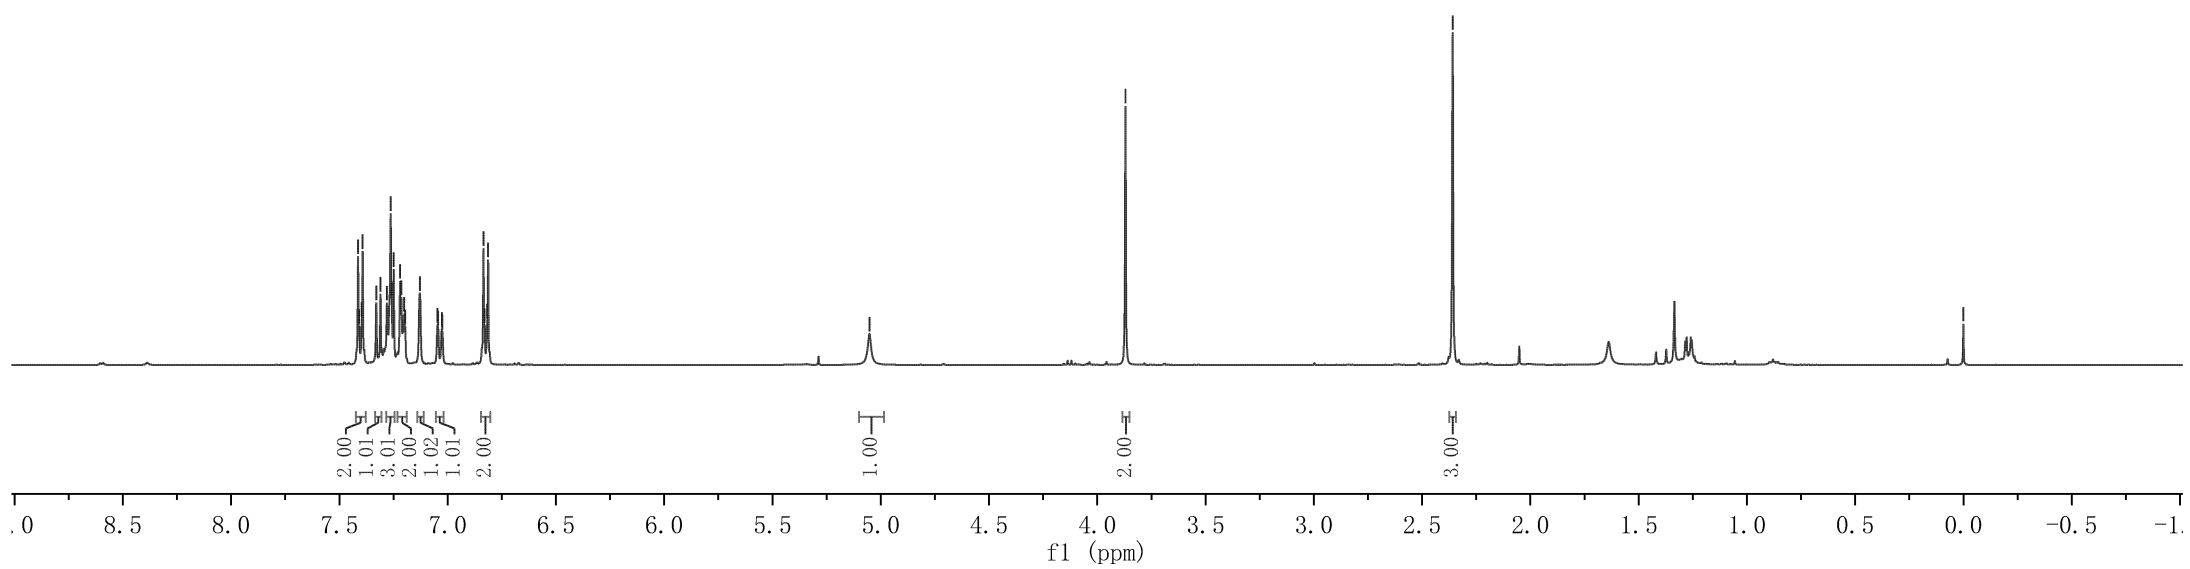



| Parameter                | Value               |
|--------------------------|---------------------|
| 1 Title                  | 1e-C                |
| 2 Origin                 |                     |
| 3 Solvent                | CDC13               |
| 4 Temperature            | 297.8               |
| 5 Number of Scans        | 800                 |
| 6 Acquisition Time       | 1.0000              |
| 7 Acquisition Date       | 2023-02-08T15:19:53 |
| 8 Spectrometer Frequency | 100.56              |
| 9 Spectral Width         | 26041.0             |

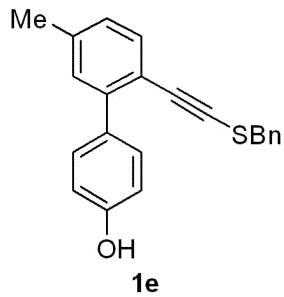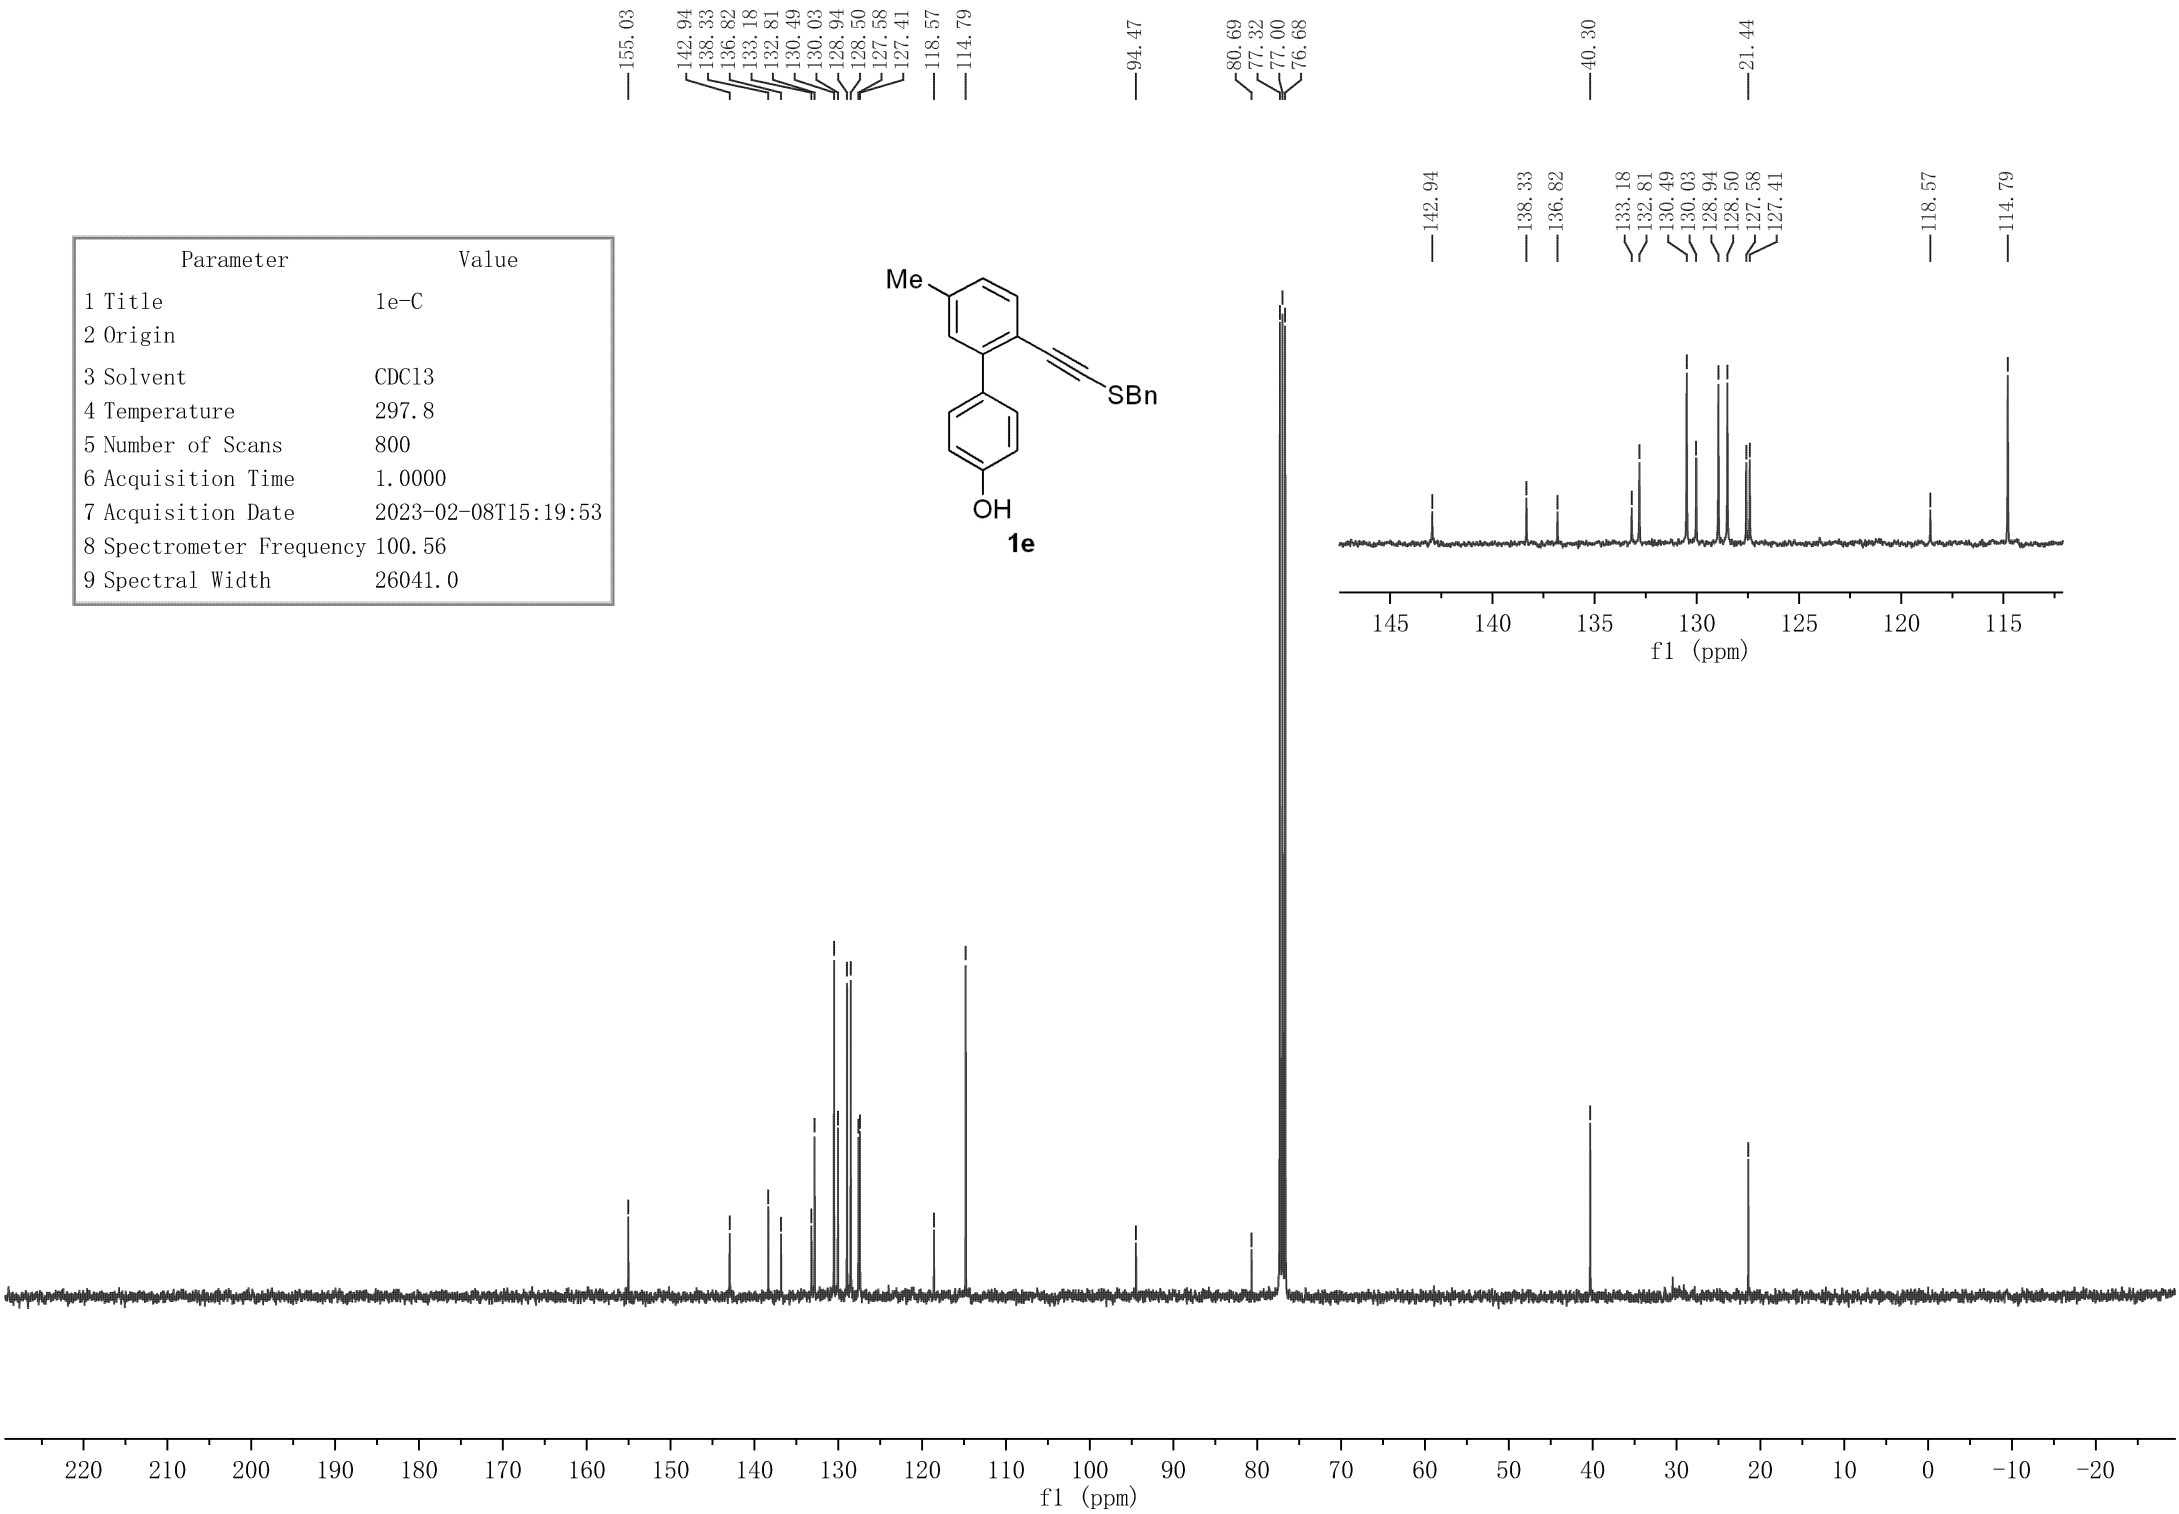

| Parameter                | Value               |
|--------------------------|---------------------|
| 1 Title                  | 1f-H-fxy-4-243      |
| 2 Origin                 | Bruker BioSpin GmbH |
| 3 Solvent                | CDCl3               |
| 4 Temperature            | 298.0               |
| 5 Number of Scans        | 11                  |
| 6 Acquisition Time       | 4.0894              |
| 7 Acquisition Date       | 2021-05-20T16:12:24 |
| 8 Spectrometer Frequency | 400.13              |
| 9 Spectral Width         | 8012.8              |

7.390  
7.369  
7.364  
7.342  
7.253  
7.234  
7.207  
7.184  
6.835  
6.828  
6.807  
6.804  
6.767  
6.761  
6.746  
6.739

5.273

3.830  
3.779

0.000

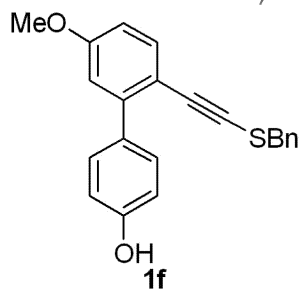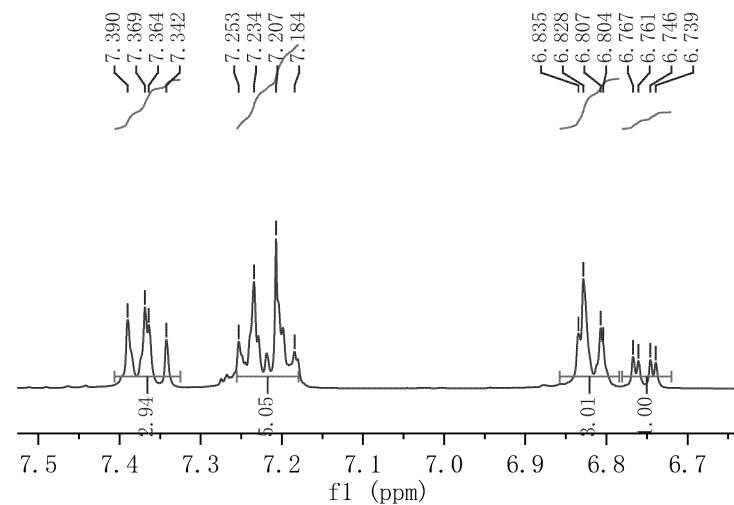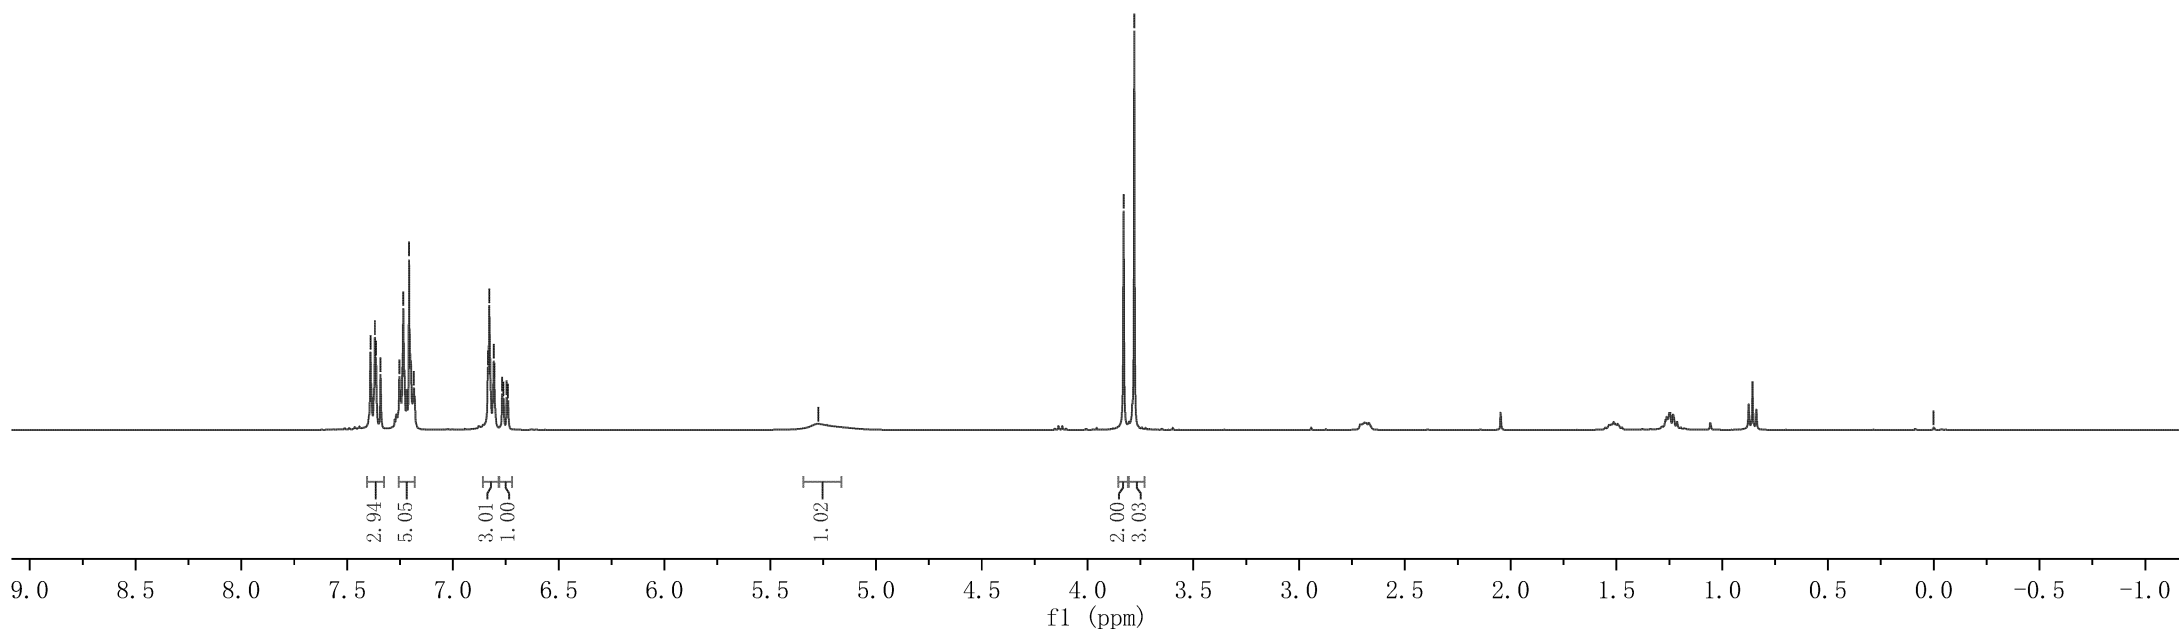

| Parameter                | Value               |
|--------------------------|---------------------|
| 1 Title                  | 1f-C-FXY-2-223-C    |
| 2 Origin                 | Bruker BioSpin GmbH |
| 3 Solvent                | CDC13               |
| 4 Temperature            | 300.0               |
| 5 Number of Scans        | 33                  |
| 6 Acquisition Time       | 1.3631              |
| 7 Acquisition Date       | 2020-07-21T14:37:12 |
| 8 Spectrometer Frequency | 100.61              |
| 9 Spectral Width         | 24038.5             |

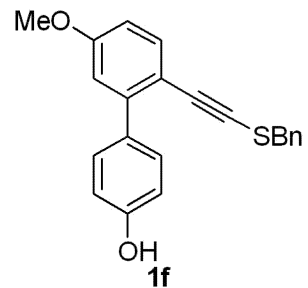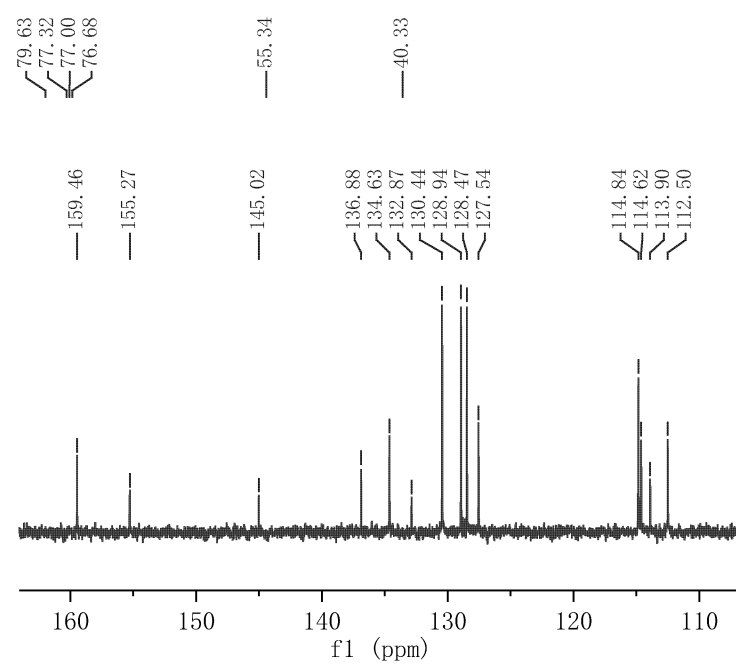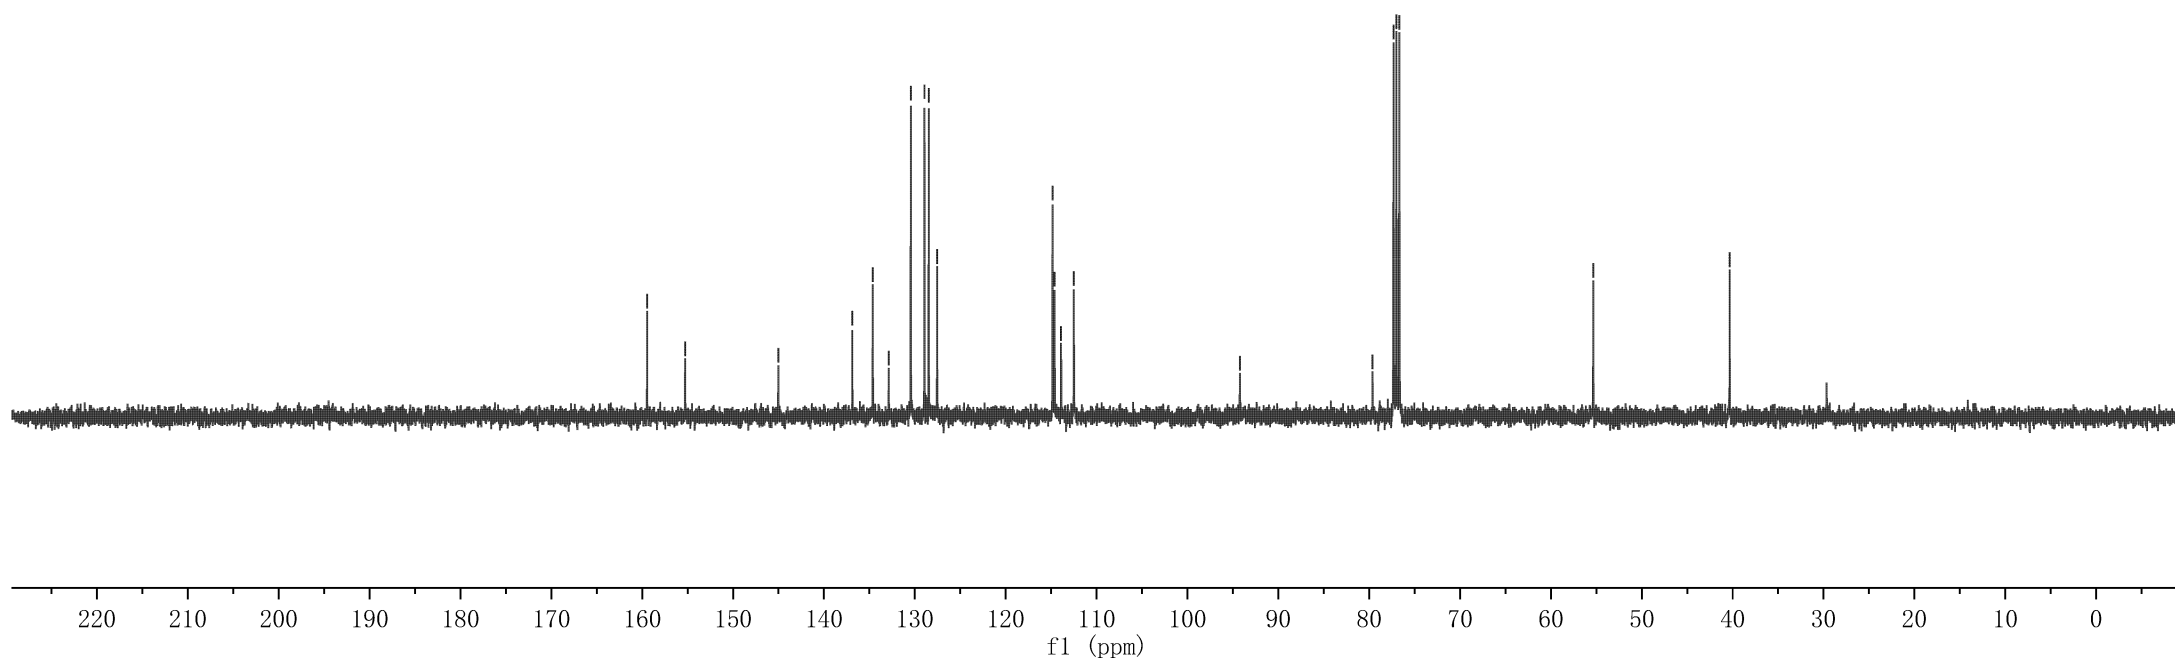

| Parameter                | Value               |
|--------------------------|---------------------|
| 1 Title                  | 1g-H                |
| 2 Origin                 |                     |
| 3 Solvent                | CDC13               |
| 4 Temperature            | 297.8               |
| 5 Number of Scans        | 16                  |
| 6 Acquisition Time       | 4.0002              |
| 7 Acquisition Date       | 2023-02-10T14:39:59 |
| 8 Spectrometer Frequency | 399.90              |
| 9 Spectral Width         | 8012.0              |

7.398  
7.393  
7.381  
7.376  
7.326  
7.296  
7.283  
7.245  
7.202  
7.194  
7.184  
7.168  
6.846  
6.842  
6.829  
6.824

5.122

3.871

0.000

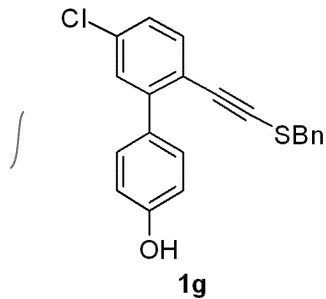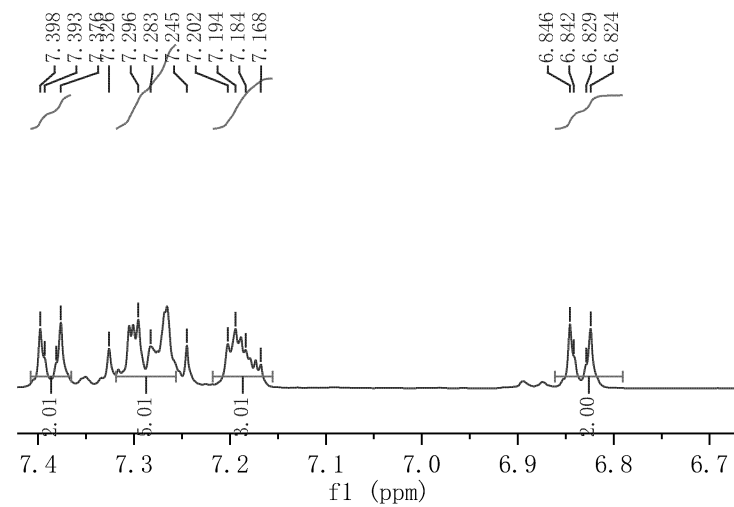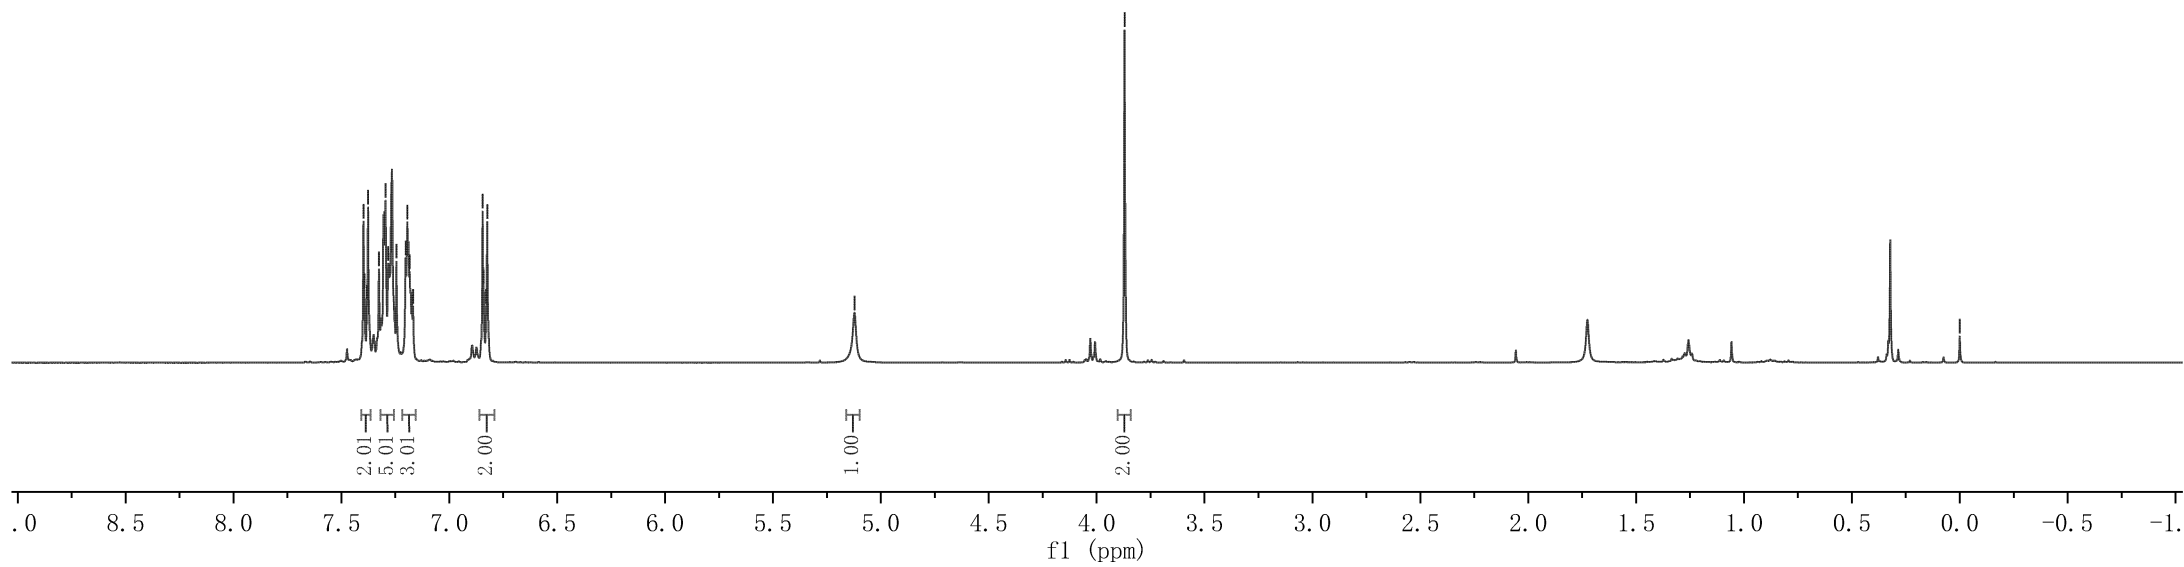

| Parameter                | Value               |
|--------------------------|---------------------|
| 1 Title                  | 1g-C                |
| 2 Origin                 |                     |
| 3 Solvent                | CDC13               |
| 4 Temperature            | 297.6               |
| 5 Number of Scans        | 800                 |
| 6 Acquisition Time       | 1.0000              |
| 7 Acquisition Date       | 2023-02-10T15:09:22 |
| 8 Spectrometer Frequency | 100.56              |
| 9 Spectral Width         | 26041.0             |

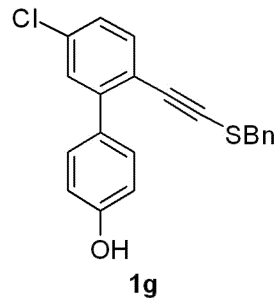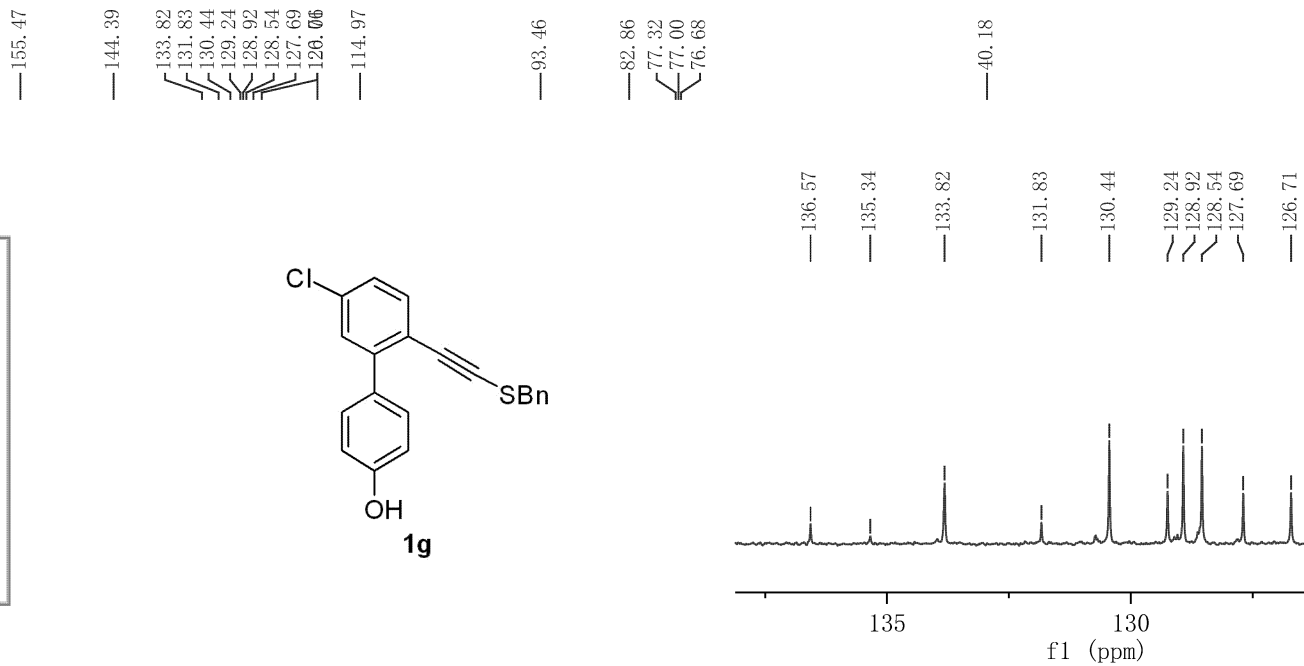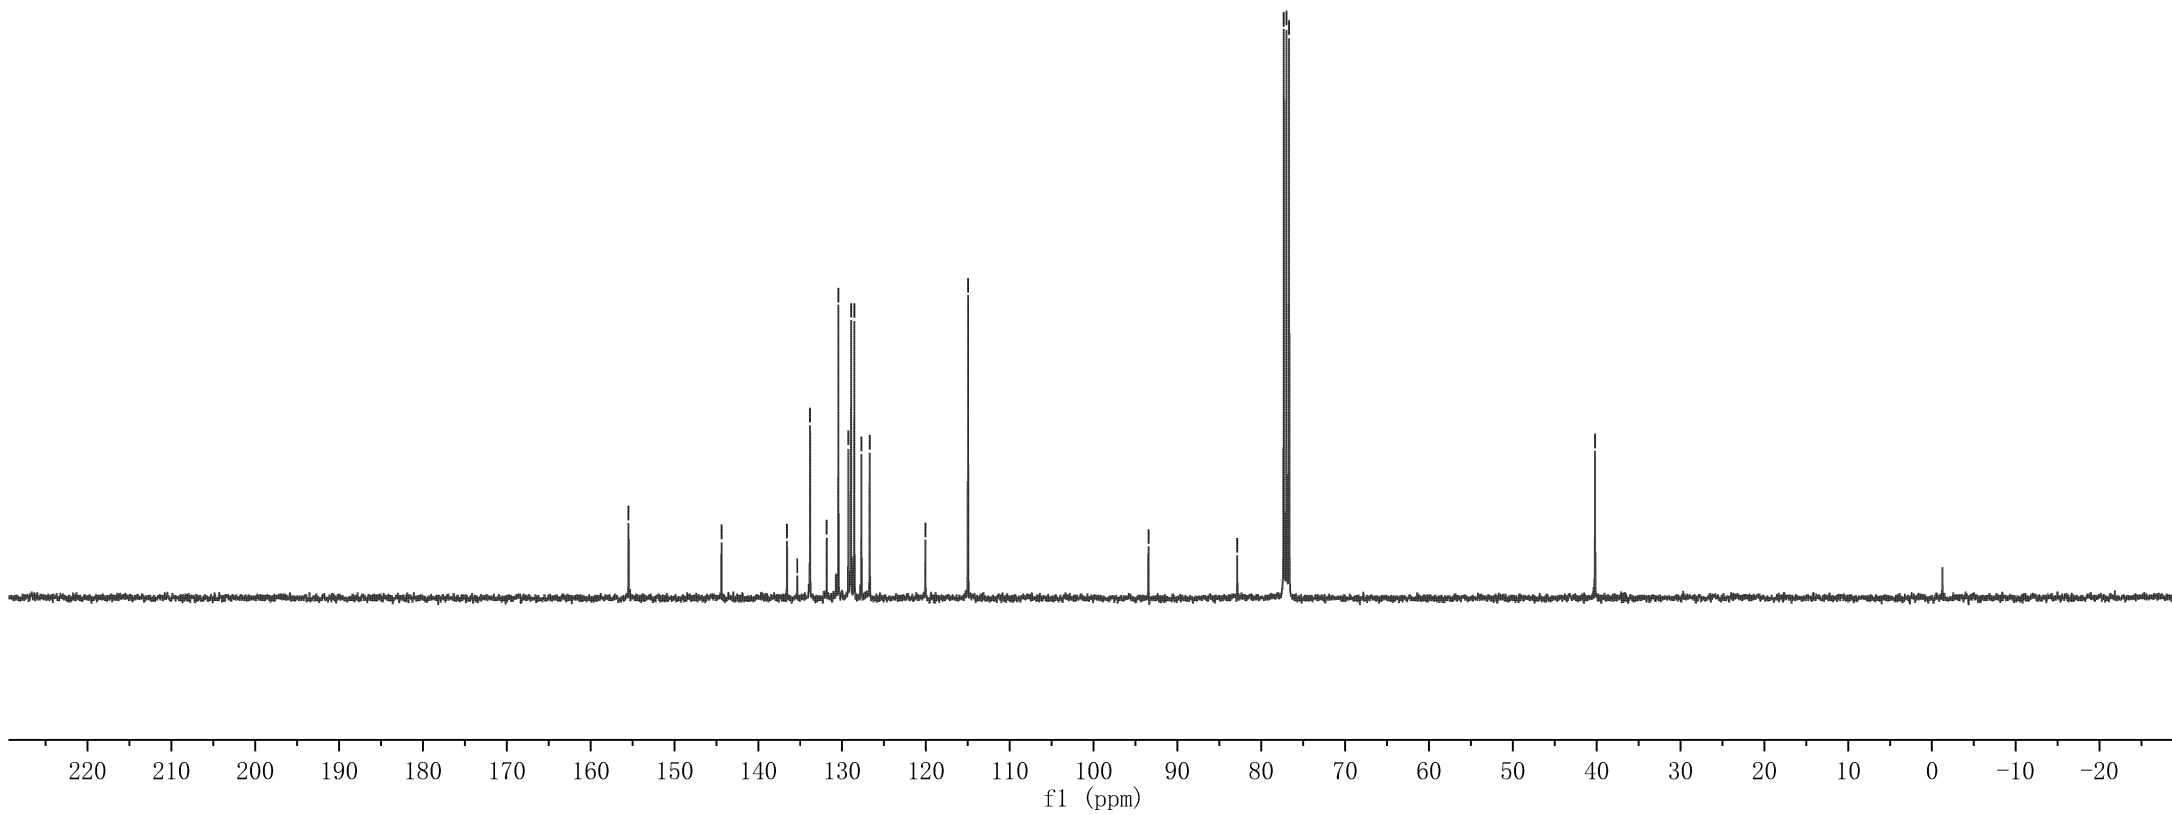

| Parameter                | Value               |
|--------------------------|---------------------|
| 1 Title                  | 1h-H                |
| 2 Origin                 |                     |
| 3 Solvent                | CDCl3               |
| 4 Temperature            | 297.8               |
| 5 Number of Scans        | 30                  |
| 6 Acquisition Time       | 4.0002              |
| 7 Acquisition Date       | 2023-02-08T11:07:18 |
| 8 Spectrometer Frequency | 399.90              |
| 9 Spectral Width         | 8012.0              |

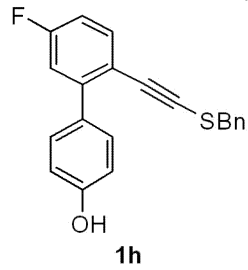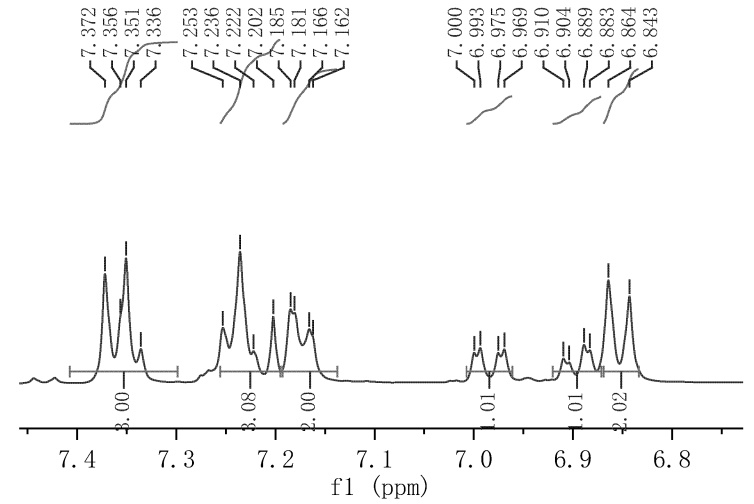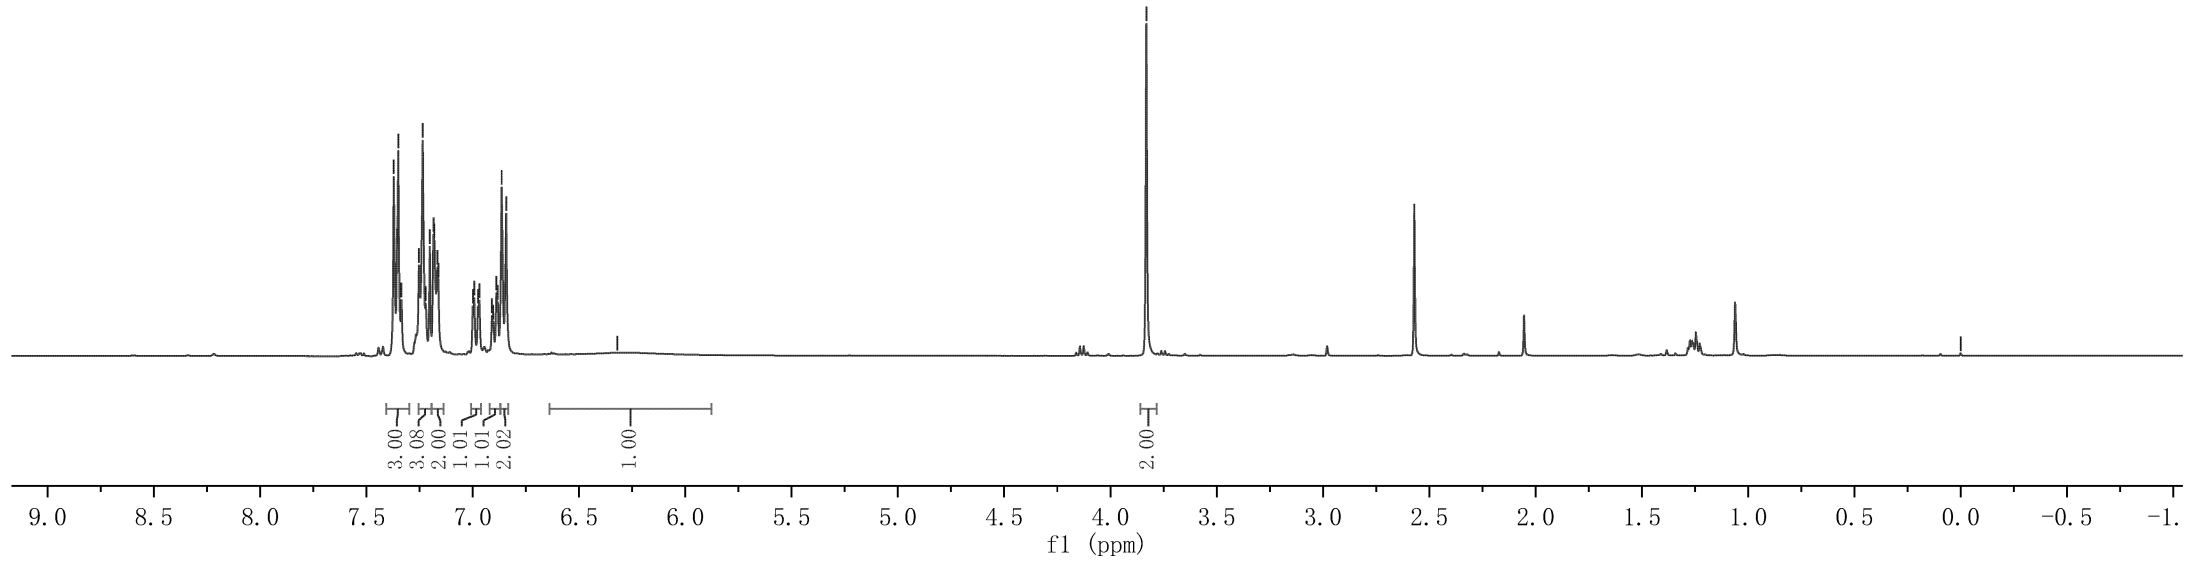

7.372, 7.356, 7.351, 7.336, 7.253, 7.236, 7.222, 7.202, 7.185, 7.181, 7.166, 7.162, 7.160, 7.000, 6.993, 6.975, 6.969, 6.910, 6.904, 6.889, 6.883, 6.864, 6.843, 6.320

3.831

0.000

| Parameter                | Value               |
|--------------------------|---------------------|
| 1 Title                  | 1h-C                |
| 2 Origin                 |                     |
| 3 Solvent                | CDC13               |
| 4 Temperature            | 297.8               |
| 5 Number of Scans        | 30                  |
| 6 Acquisition Time       | 4.0002              |
| 7 Acquisition Date       | 2023-02-08T11:07:18 |
| 8 Spectrometer Frequency | 399.90              |
| 9 Spectral Width         | 8012.0              |

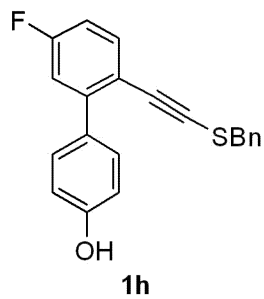

163.35  
160.86  
155.70

145.39  
145.31

136.60  
134.74  
134.66  
130.35  
128.88  
128.46  
127.99  
117.46  
116.15  
115.93  
115.02  
113.79  
113.57

93.46

81.19  
77.32  
77.00  
76.68

40.08

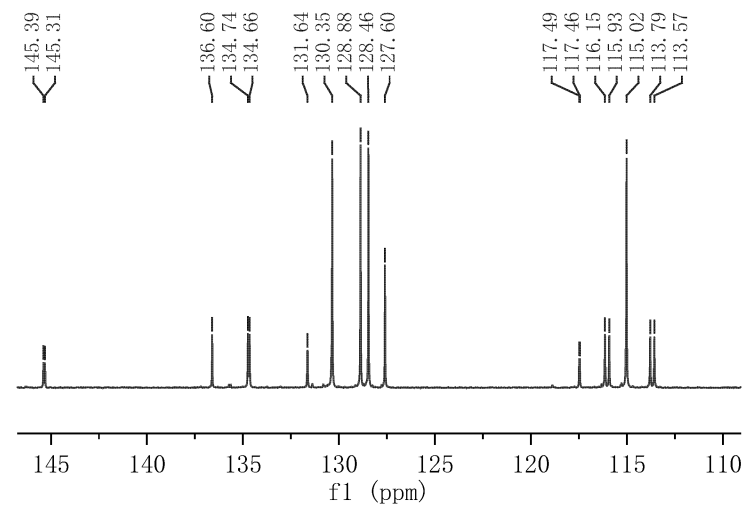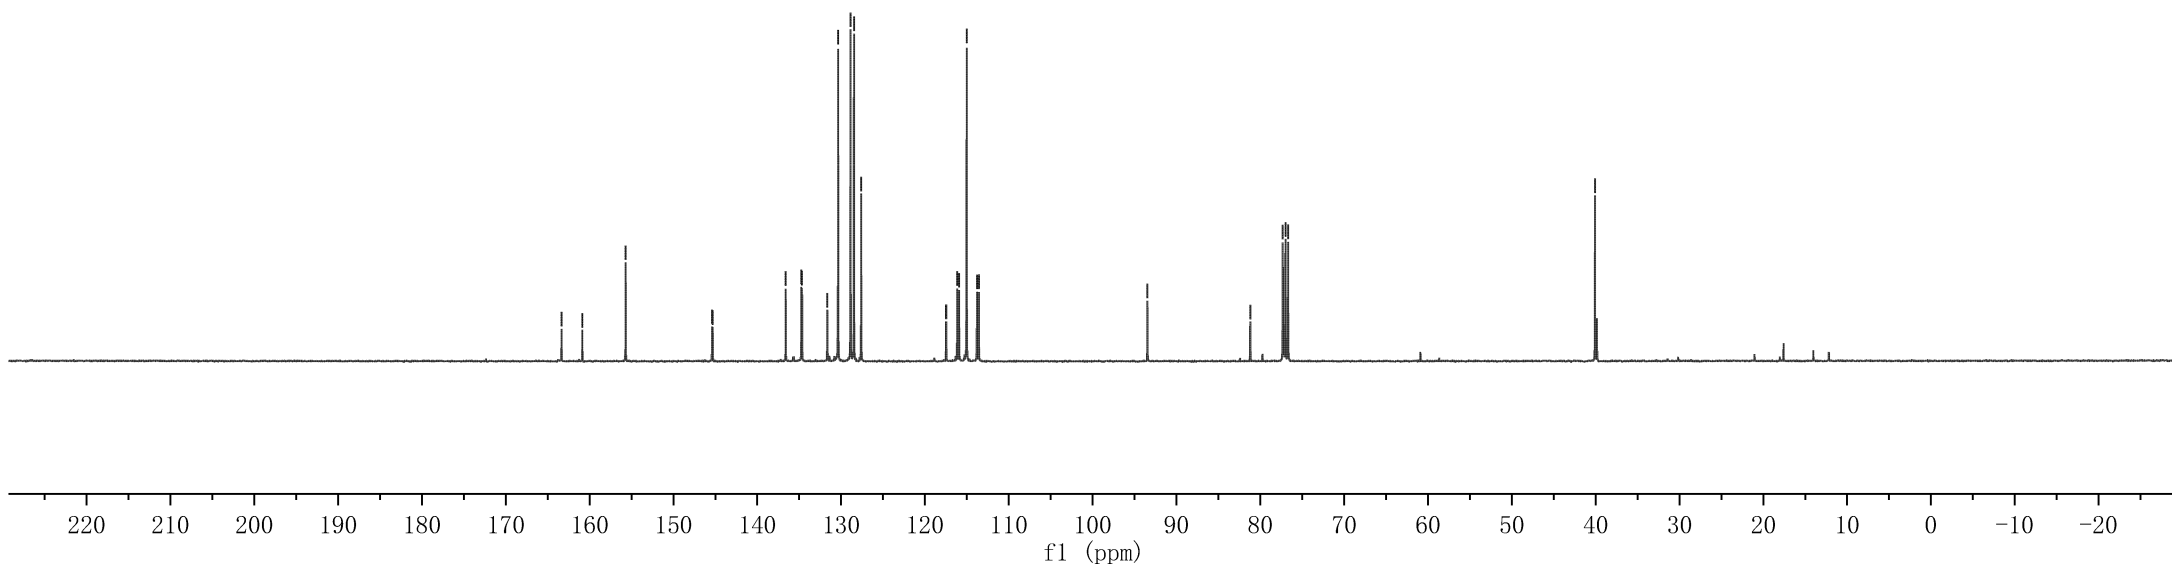

| Parameter                | Value               |
|--------------------------|---------------------|
| 1 Title                  | 1h-F                |
| 2 Origin                 |                     |
| 3 Solvent                | CDC13               |
| 4 Temperature            | 297.8               |
| 5 Number of Scans        | 30                  |
| 6 Acquisition Time       | 1.0000              |
| 7 Acquisition Date       | 2023-02-08T12:12:17 |
| 8 Spectrometer Frequency | 376.28              |
| 9 Spectral Width         | 96153.0             |

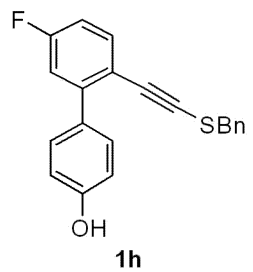

-111.01

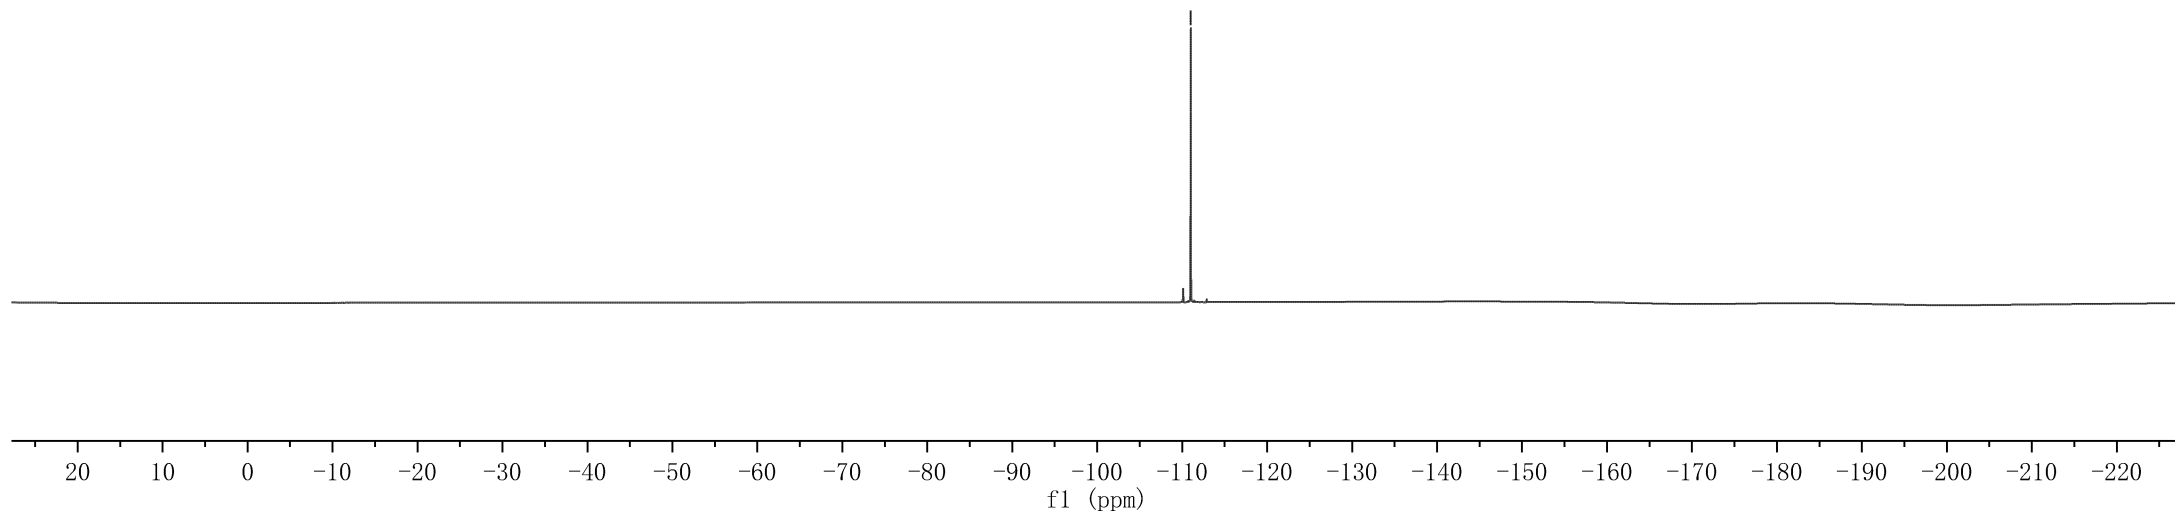



| Parameter                | Value               |
|--------------------------|---------------------|
| 1 Title                  | 1i-Hfxy-4-239(pe    |
| 2 Origin                 | Bruker BioSpin GmbH |
| 3 Solvent                | CDCl <sub>3</sub>   |
| 4 Temperature            | 298.0               |
| 5 Number of Scans        | 7                   |
| 6 Acquisition Time       | 4.0894              |
| 7 Acquisition Date       | 2021-05-20T10:00:52 |
| 8 Spectrometer Frequency | 400.13              |
| 9 Spectral Width         | 8012.8              |

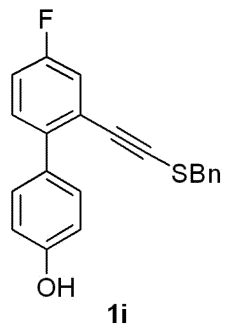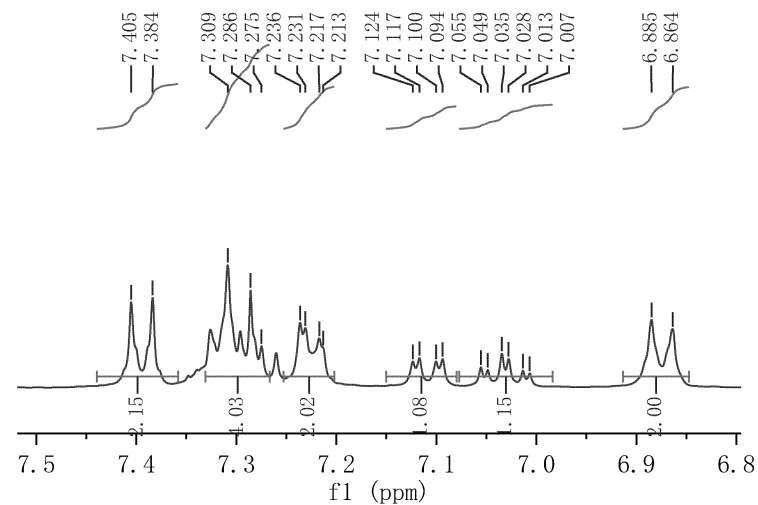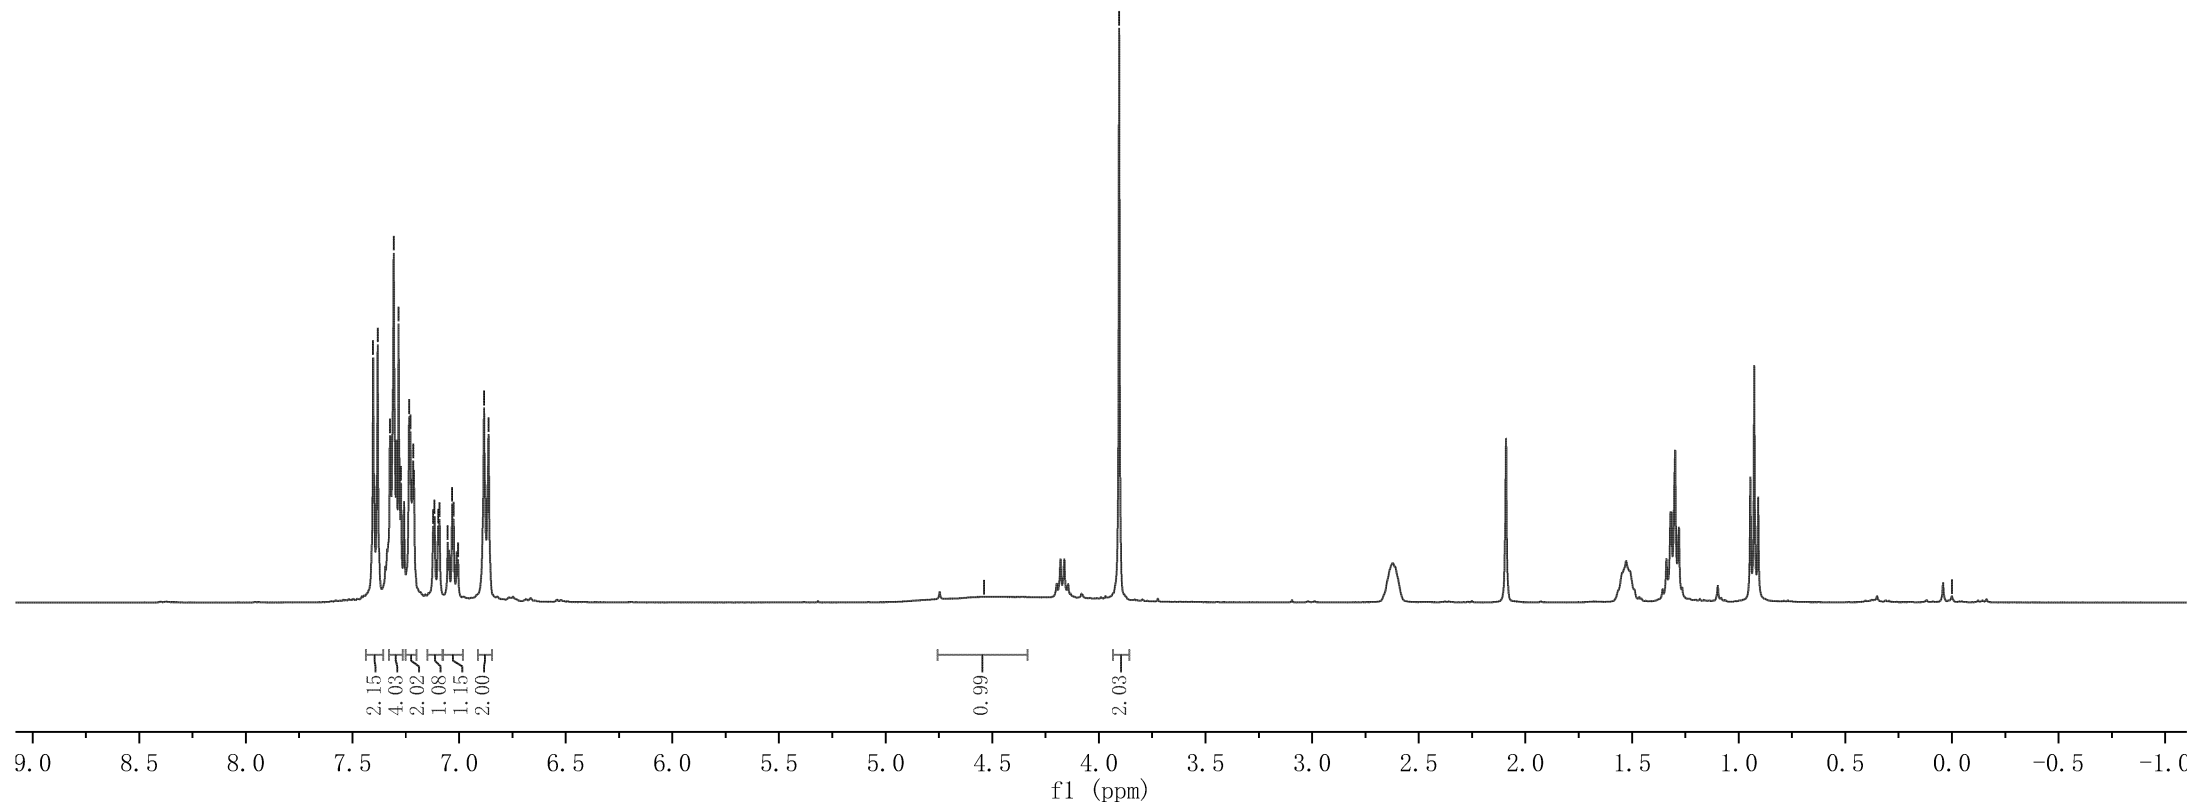

7.403  
7.382  
7.324  
7.307  
7.284  
7.273  
7.234  
7.229  
7.215  
7.211  
7.122  
7.115  
7.098  
7.092  
7.053  
7.033  
7.026  
7.005  
6.883  
6.862

4.539

3.905

0.000

| Parameter                | Value               |
|--------------------------|---------------------|
| 1 Title                  | FXY-4-239-NEW-C     |
| 2 Origin                 | Bruker BioSpin GmbH |
| 3 Solvent                | CDC13               |
| 4 Temperature            | 300.0               |
| 5 Number of Scans        | 84                  |
| 6 Acquisition Time       | 1.3631              |
| 7 Acquisition Date       | 2021-05-21T16:04:45 |
| 8 Spectrometer Frequency | 100.61              |
| 9 Spectral Width         | 24038.5             |

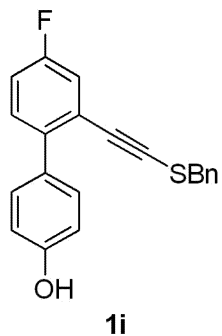

162.34  
159.89  
155.46

139.14  
139.11  
136.51  
131.96  
130.82  
130.73  
130.45  
128.92  
128.55  
127.71  
123.17  
123.07  
118.79  
118.57  
115.43  
115.22  
115.01

93.56

83.23  
77.32  
77.00  
76.68

40.14

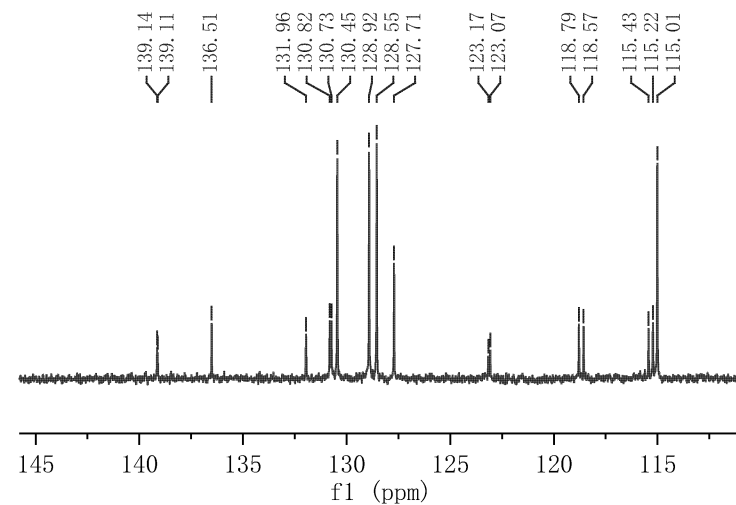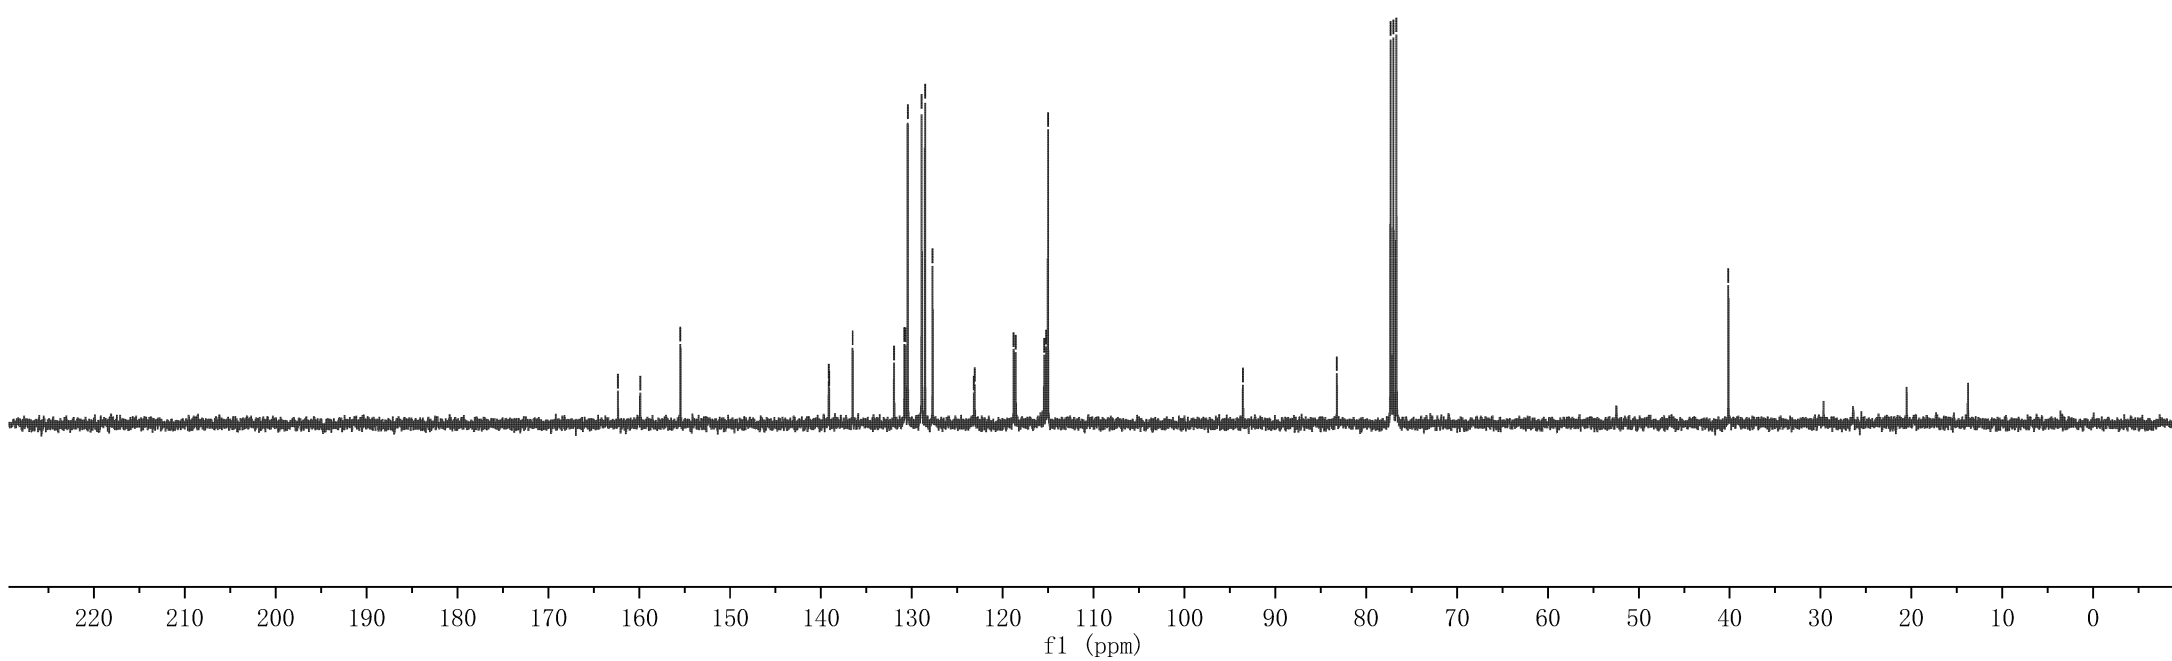

| Parameter                | Value               |
|--------------------------|---------------------|
| 1 Title                  | fxylifnmr           |
| 2 Origin                 |                     |
| 3 Solvent                | CDC13               |
| 4 Temperature            | 296.8               |
| 5 Number of Scans        | 32                  |
| 6 Acquisition Time       | 1.0000              |
| 7 Acquisition Date       | 2023-03-03T09:14:24 |
| 8 Spectrometer Frequency | 376.28              |
| 9 Spectral Width         | 96153.0             |

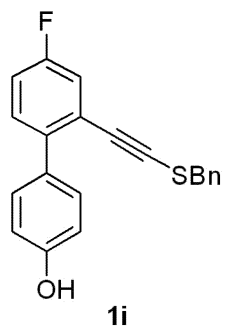

—116.45

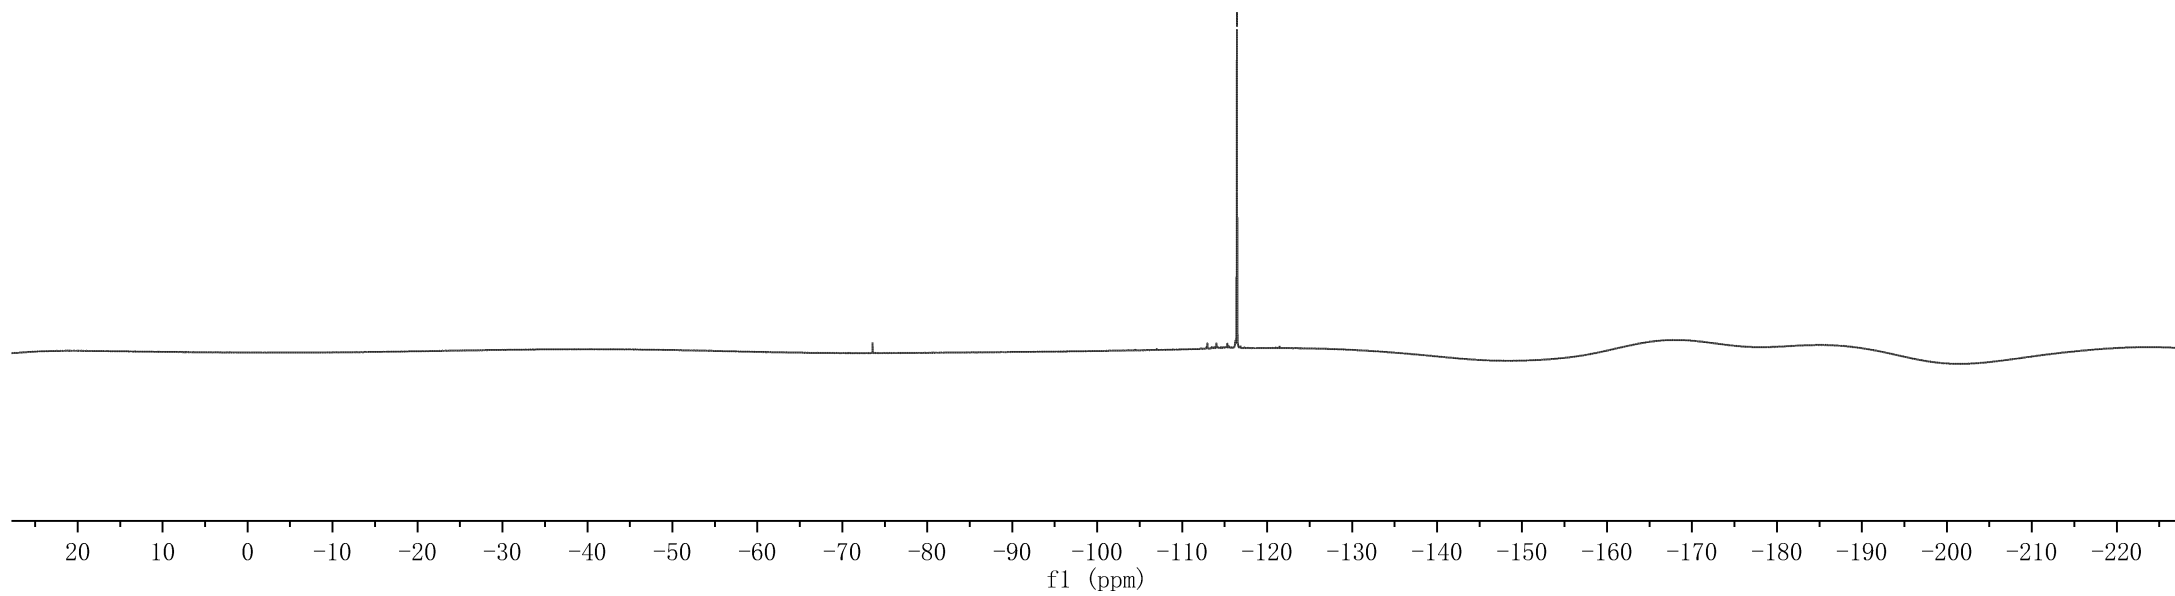

| Parameter                | Value               |
|--------------------------|---------------------|
| 1 Title                  | 1j-H-fxy-5-2-new    |
| 2 Origin                 | Bruker BioSpin GmbH |
| 3 Solvent                | CDCl3               |
| 4 Temperature            | 298.0               |
| 5 Number of Scans        | 10                  |
| 6 Acquisition Time       | 4.0894              |
| 7 Acquisition Date       | 2021-05-21T10:18:13 |
| 8 Spectrometer Frequency | 400.13              |
| 9 Spectral Width         | 8012.8              |

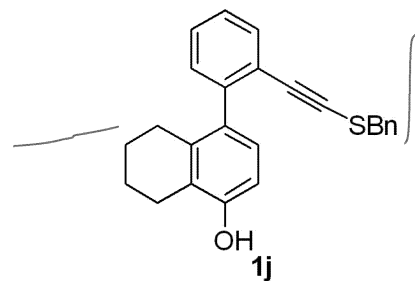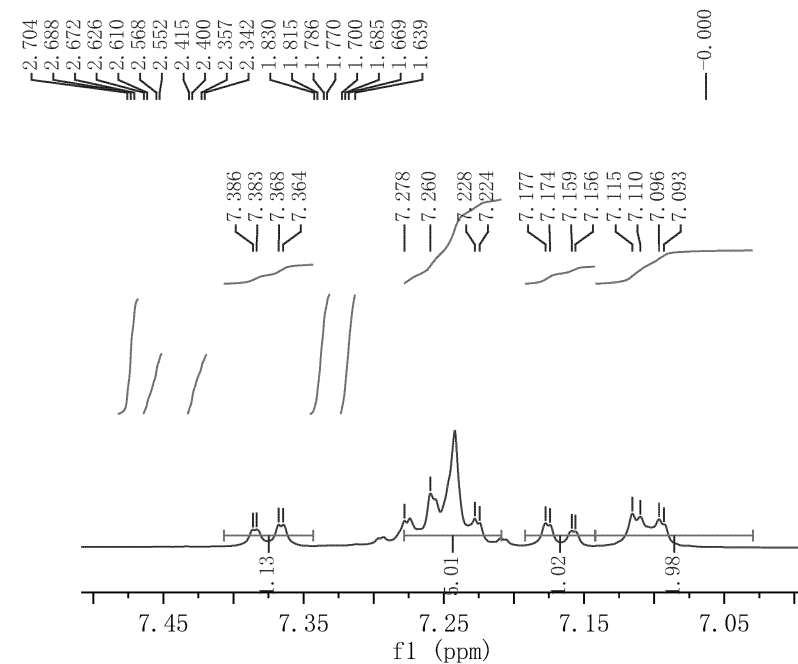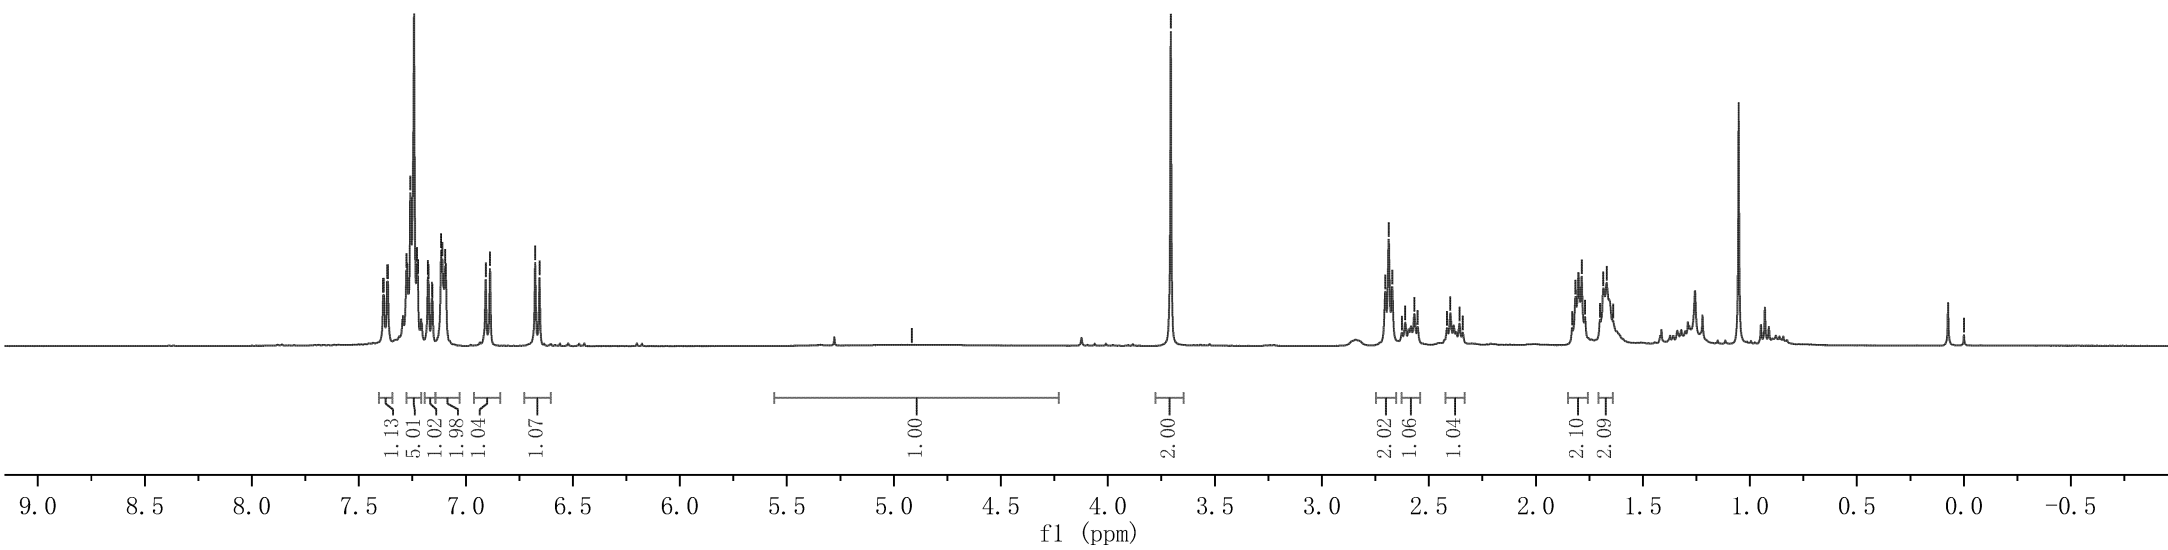

7.386  
7.383  
7.368  
7.364  
7.278  
7.260  
7.228  
7.224  
7.177  
7.174  
7.159  
7.156  
7.115  
7.110  
7.096  
7.093  
6.907  
6.887  
6.676  
6.656

4.916

3.706

2.704  
2.688  
2.672  
2.626  
2.610  
2.568  
2.552  
2.415  
2.400  
2.357  
2.342  
1.830  
1.815  
1.786  
1.770  
1.700  
1.685  
1.669  
1.639

0.000

| Parameter                | Value               |
|--------------------------|---------------------|
| 1 Title                  | 1j-c-fxy-5-2-new-C  |
| 2 Origin                 | Bruker BioSpin GmbH |
| 3 Solvent                | CDC13               |
| 4 Temperature            | 300.0               |
| 5 Number of Scans        | 49                  |
| 6 Acquisition Time       | 1.3631              |
| 7 Acquisition Date       | 2021-05-21T10:19:40 |
| 8 Spectrometer Frequency | 100.61              |
| 9 Spectral Width         | 24038.5             |

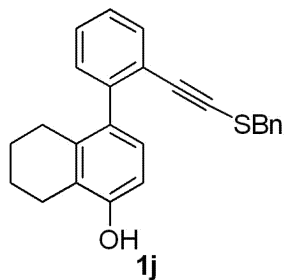

152.96 143.79 136.95 136.79 133.35 131.21 129.97 128.74 128.49 127.55 127.51 126.61 123.46 123.03 111.29 94.24 82.08 77.32 77.00 76.68 40.73 27.91 23.24 22.79 22.46

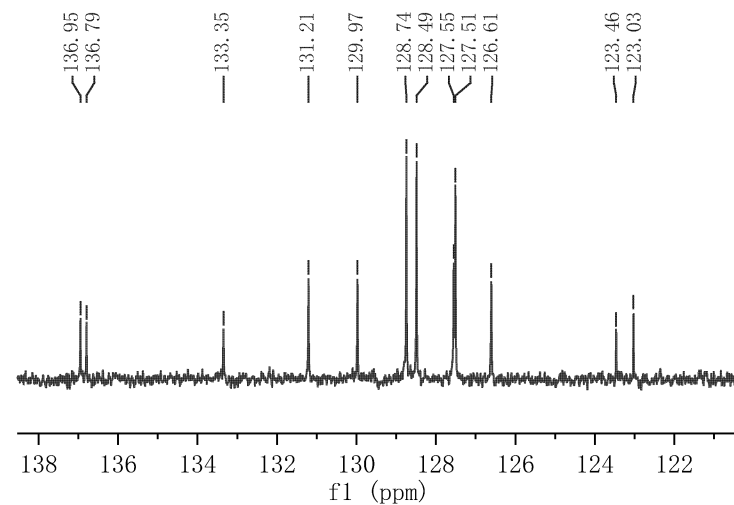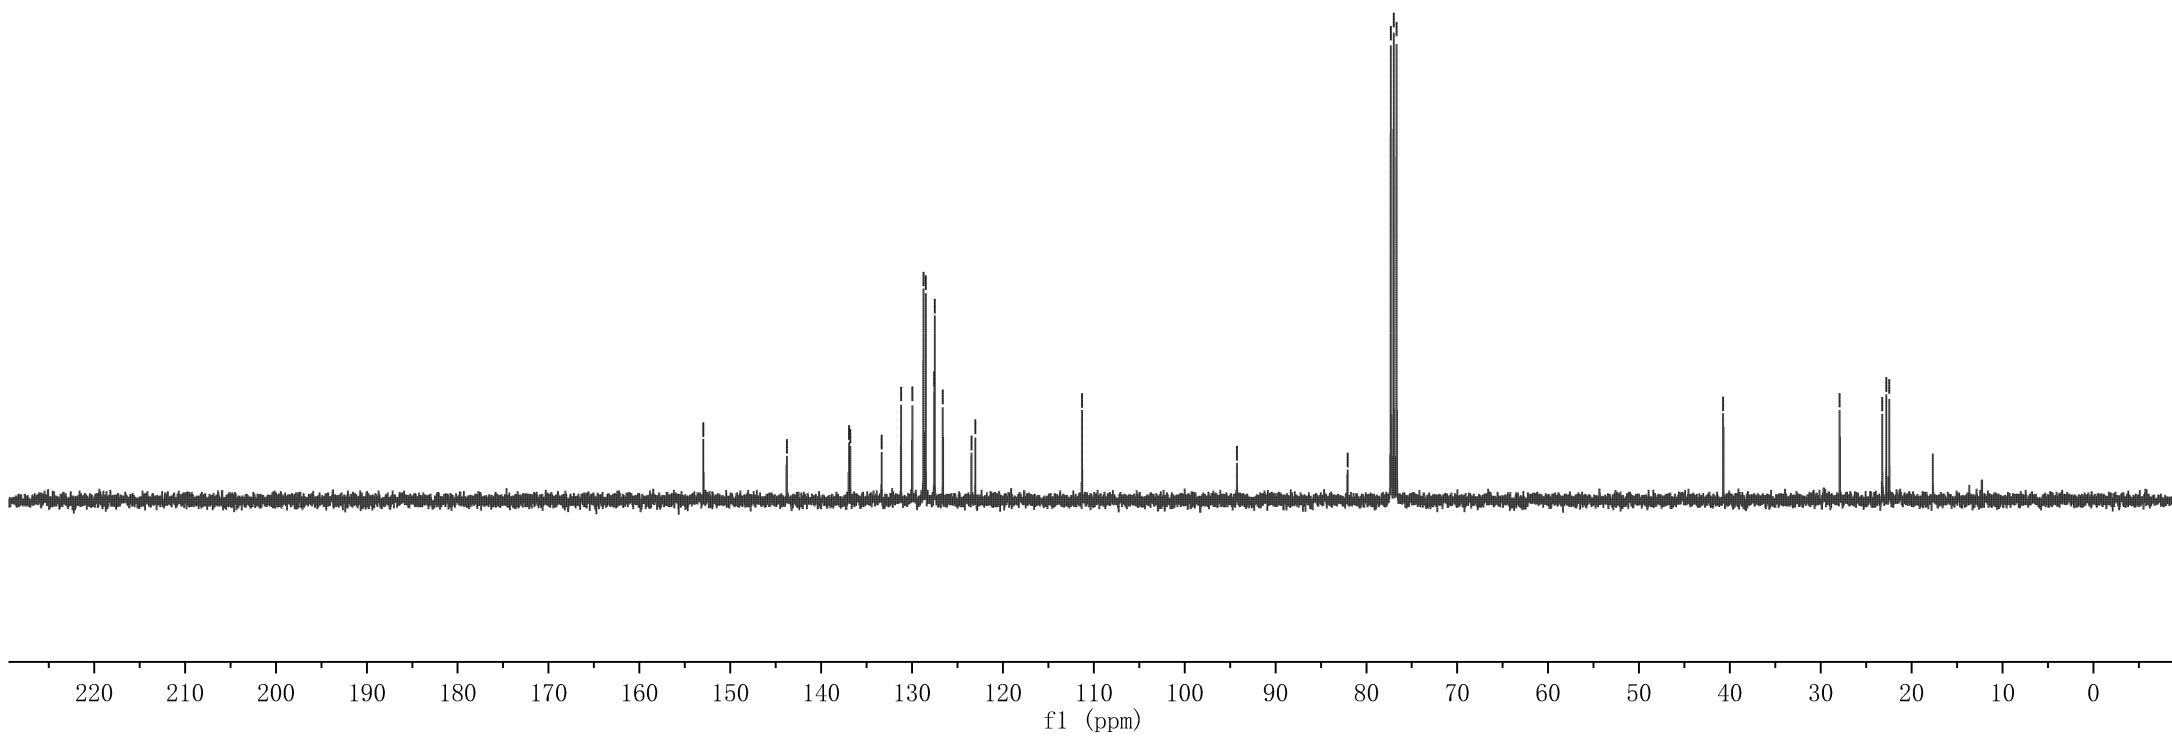

7.398  
7.395  
7.379  
7.376  
7.283  
7.251  
7.243  
7.234  
7.179  
7.176  
7.161  
7.158  
7.131  
7.126  
7.112  
7.109  
7.072  
7.051  
6.735  
6.729  
6.699  
6.693  
6.679  
6.673

| Parameter                | Value               |
|--------------------------|---------------------|
| 1 Title                  | 1k-H-fxy-4-235-hhh  |
| 2 Origin                 | Bruker BioSpin GmbH |
| 3 Solvent                | CDCl3               |
| 4 Temperature            | 298.0               |
| 5 Number of Scans        | 10                  |
| 6 Acquisition Time       | 4.0894              |
| 7 Acquisition Date       | 2021-05-19T10:14:57 |
| 8 Spectrometer Frequency | 400.13              |
| 9 Spectral Width         | 8012.8              |

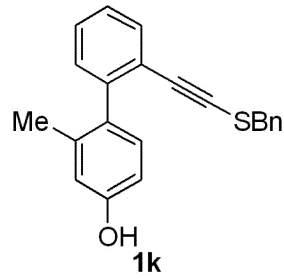

—3.724

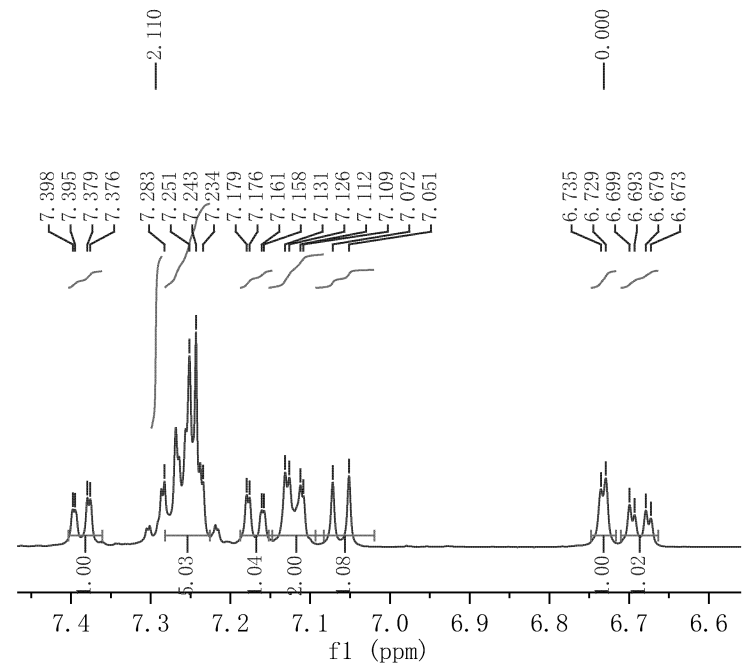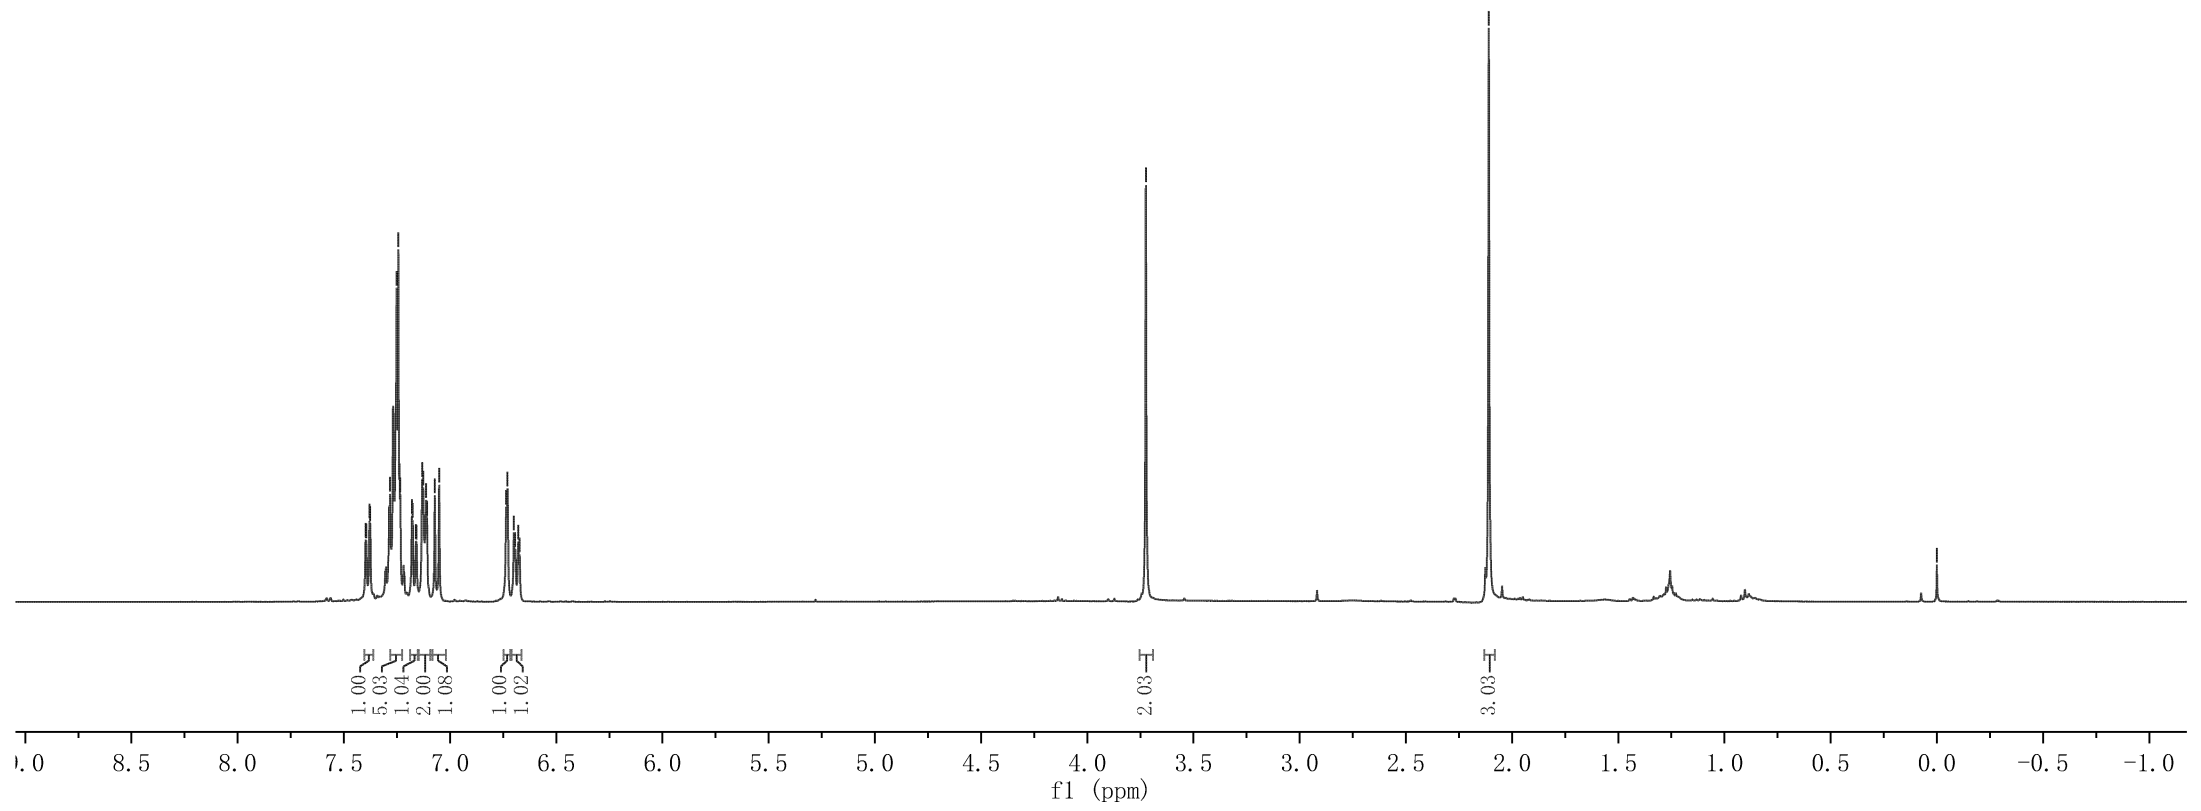

| Parameter                | Value               |
|--------------------------|---------------------|
| 1 Title                  | 1k-C-FXY-4-235-c'   |
| 2 Origin                 | Bruker BioSpin GmbH |
| 3 Solvent                | CDC13               |
| 4 Temperature            | 300.0               |
| 5 Number of Scans        | 75                  |
| 6 Acquisition Time       | 1.3631              |
| 7 Acquisition Date       | 2021-05-19T15:24:57 |
| 8 Spectrometer Frequency | 100.61              |
| 9 Spectral Width         | 24038.5             |

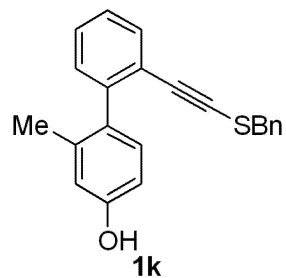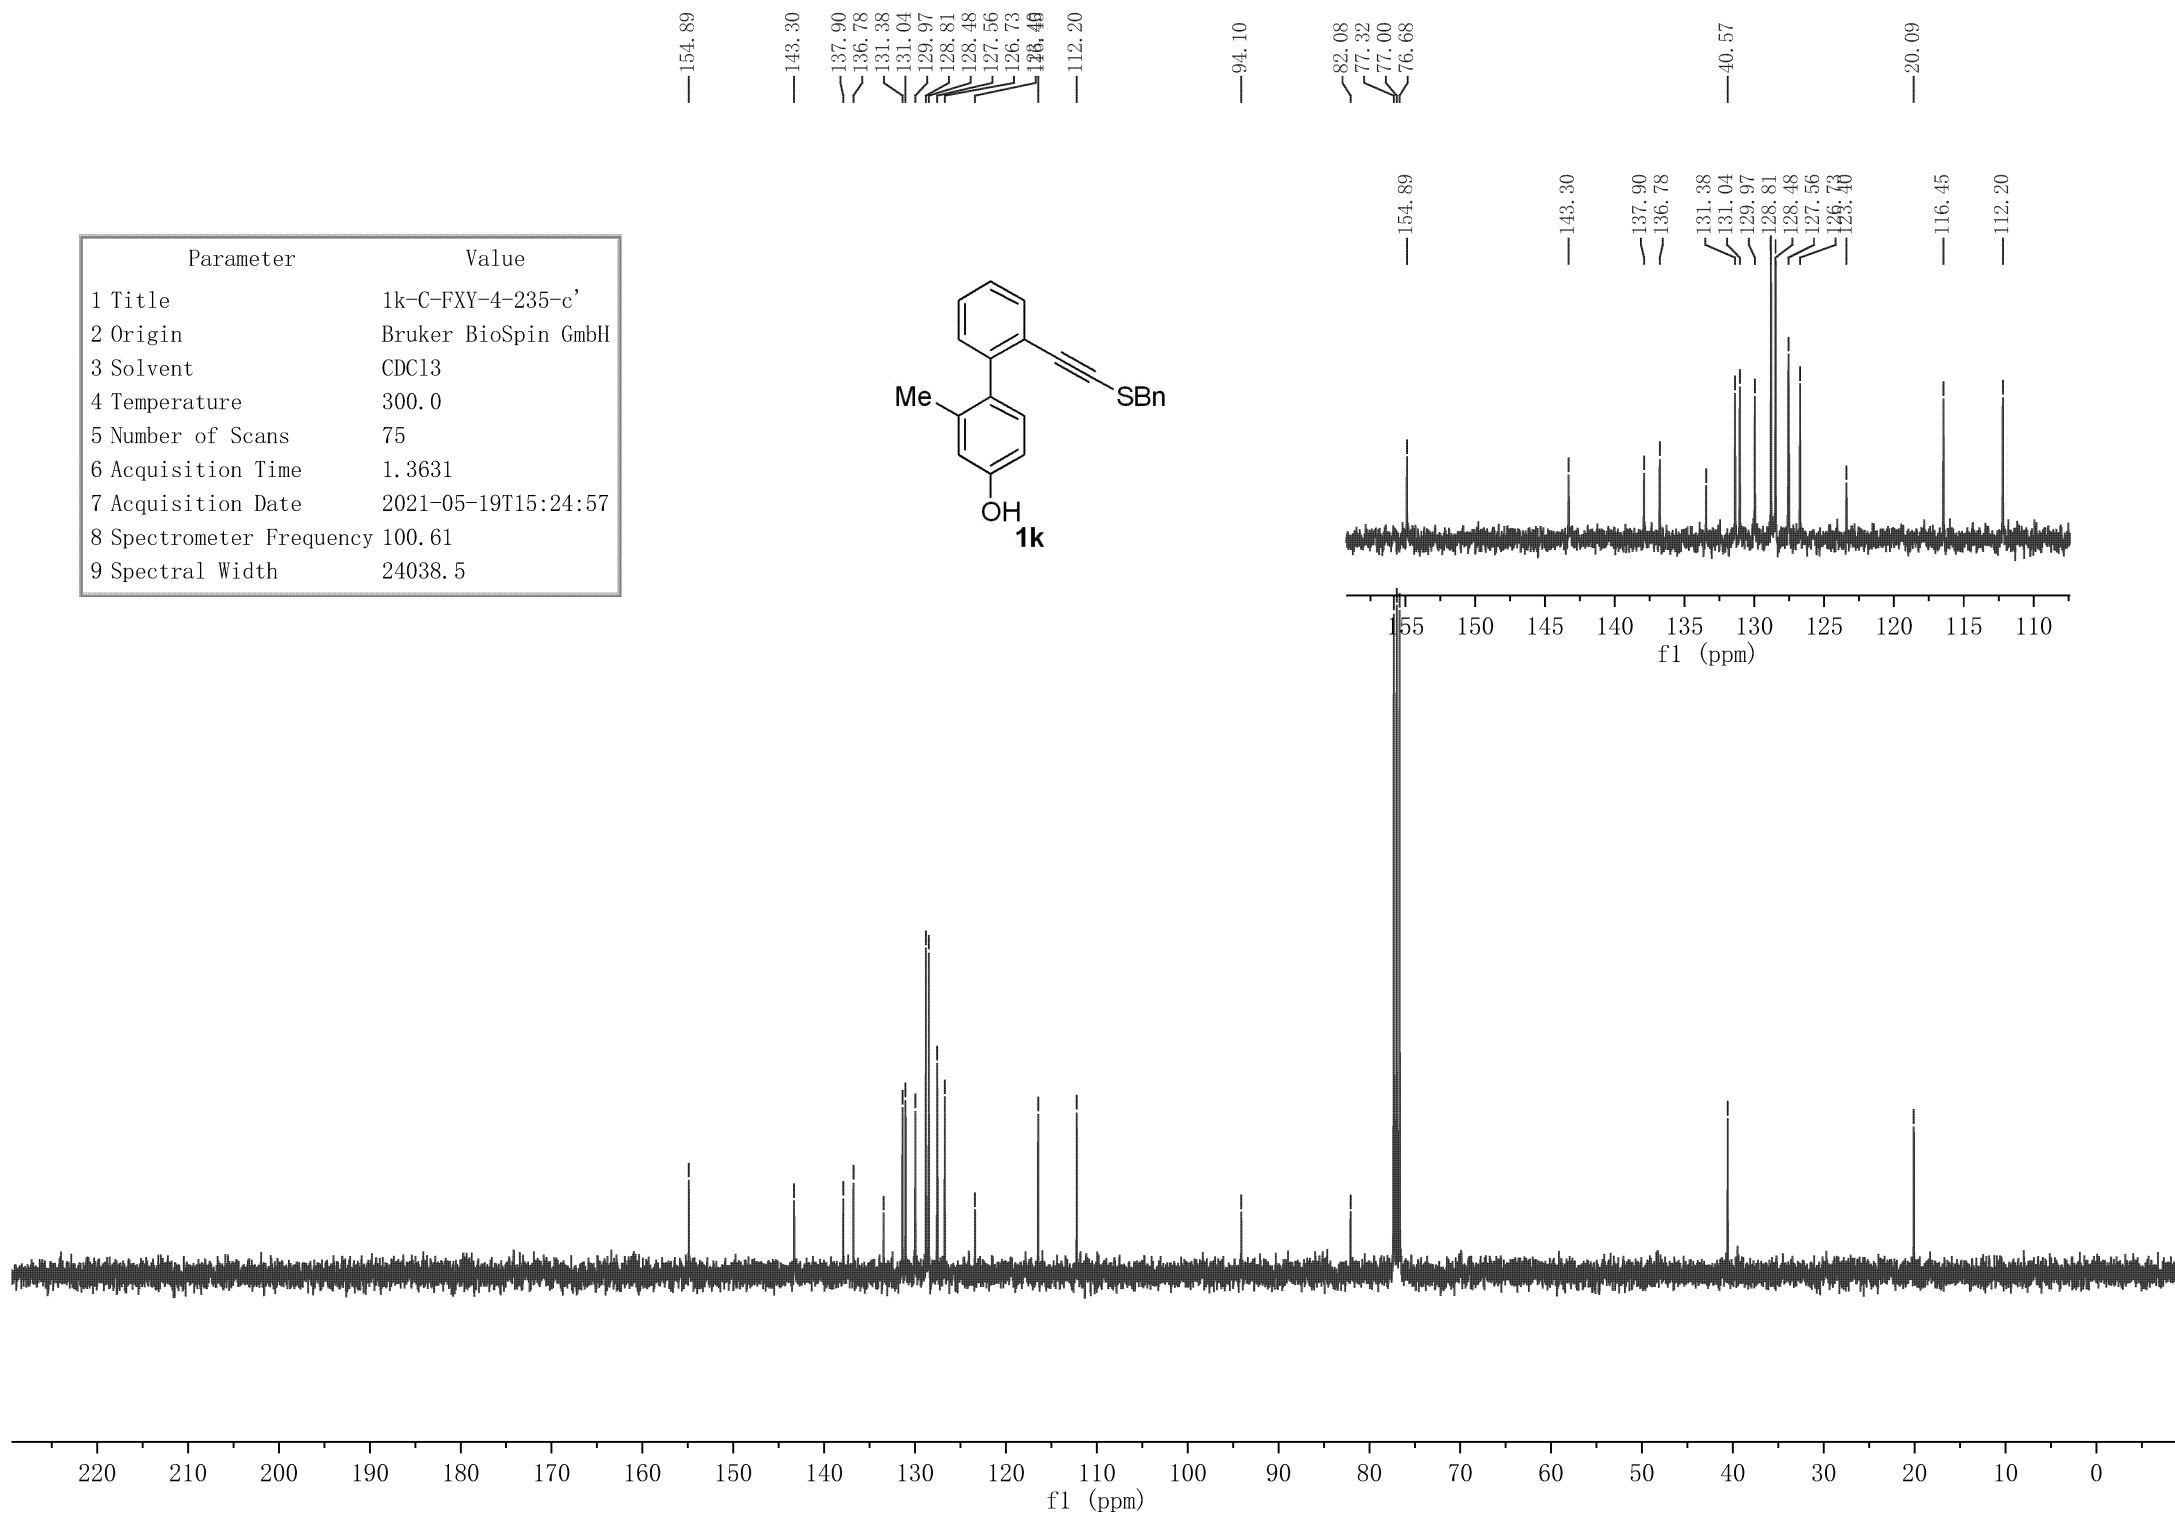

| Parameter                | Value               |
|--------------------------|---------------------|
| 1 Title                  | 11-Hfxy-4-240-hex   |
| 2 Origin                 | Bruker BioSpin GmbH |
| 3 Solvent                | CDCl3               |
| 4 Temperature            | 298.0               |
| 5 Number of Scans        | 8                   |
| 6 Acquisition Time       | 4.0894              |
| 7 Acquisition Date       | 2021-05-20T15:59:04 |
| 8 Spectrometer Frequency | 400.13              |
| 9 Spectral Width         | 8012.8              |

7.561  
7.543  
7.475  
7.455  
7.438  
7.435  
7.419  
7.417  
7.370  
7.358  
7.320  
7.298  
7.278  
7.274  
7.162  
7.157  
7.141  
7.137  
7.085  
7.065

5.549

3.970  
3.936

0.000

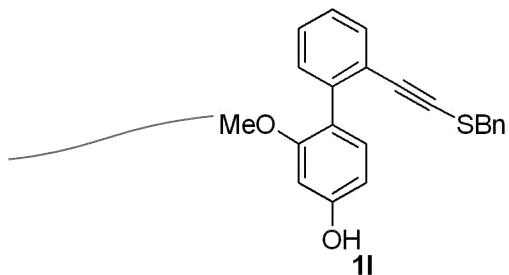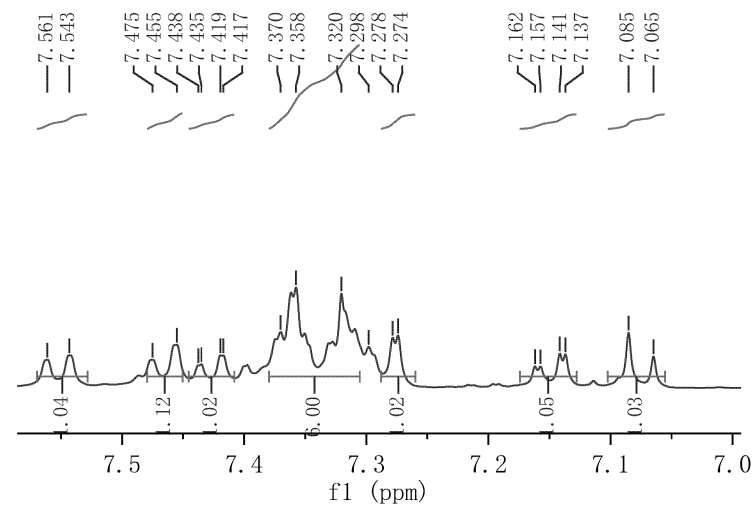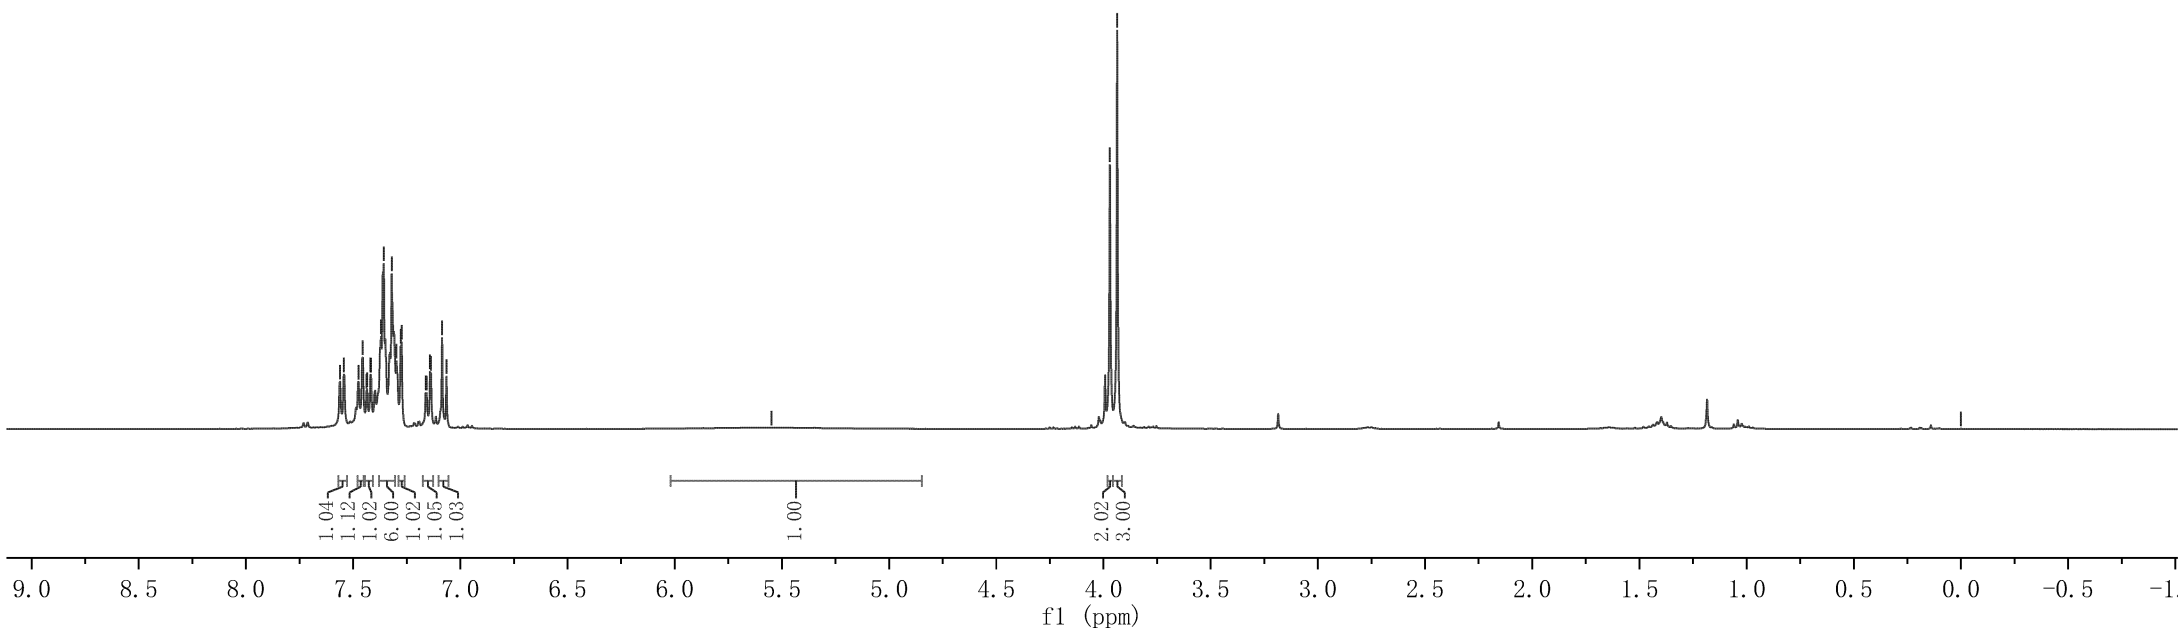



| Parameter                | Value                |
|--------------------------|----------------------|
| 1 Title                  | 11-C-fxy-4-240-hex-C |
| 2 Origin                 | Bruker BioSpin GmbH  |
| 3 Solvent                | CDC13                |
| 4 Temperature            | 300.0                |
| 5 Number of Scans        | 13                   |
| 6 Acquisition Time       | 1.3631               |
| 7 Acquisition Date       | 2021-05-20T16:00:26  |
| 8 Spectrometer Frequency | 100.61               |
| 9 Spectral Width         | 24038.5              |

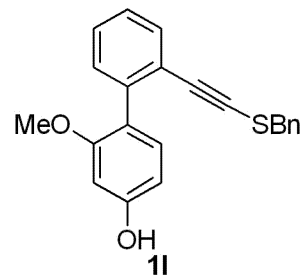

145.79  
145.18  
143.11  
136.59  
132.82  
132.48  
129.20  
128.80  
128.41  
128.18  
127.56  
126.49  
124.02  
112.02

94.54

81.90  
77.32  
77.00  
76.68

55.87

40.23

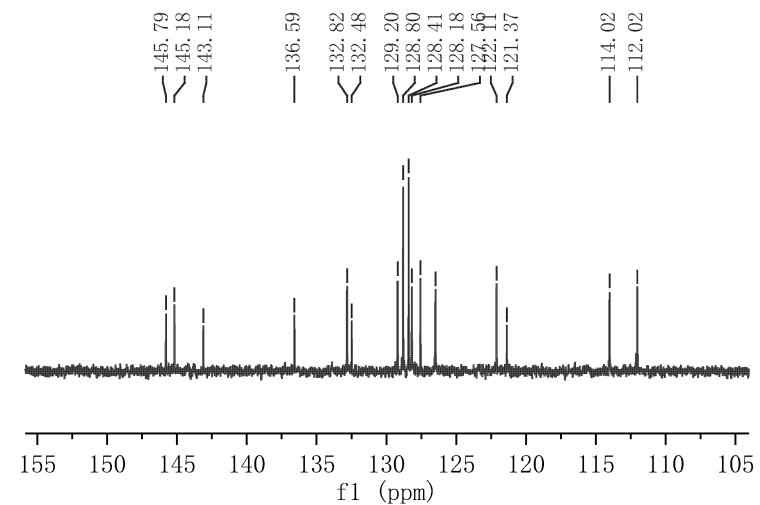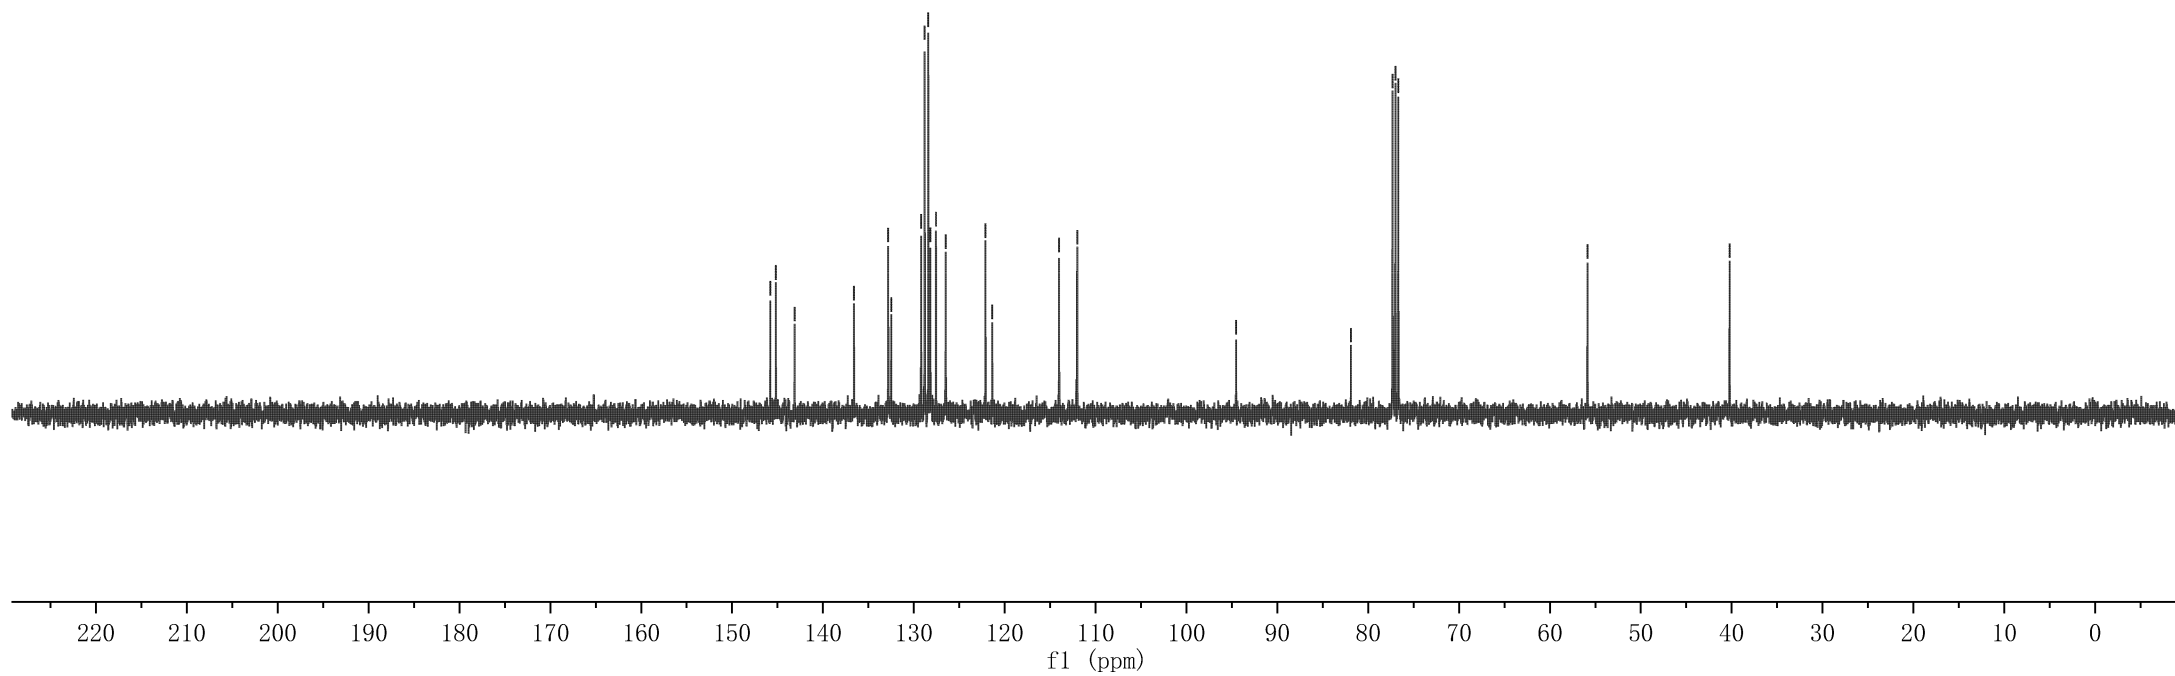

| Parameter                | Value               |
|--------------------------|---------------------|
| 1 Title                  | 1m-H-fxy-4-234-real |
| 2 Origin                 | Bruker BioSpin GmbH |
| 3 Solvent                | CDCl <sub>3</sub>   |
| 4 Temperature            | 298.0               |
| 5 Number of Scans        | 6                   |
| 6 Acquisition Time       | 4.0894              |
| 7 Acquisition Date       | 2021-05-19T10:20:31 |
| 8 Spectrometer Frequency | 400.13              |
| 9 Spectral Width         | 8012.8              |

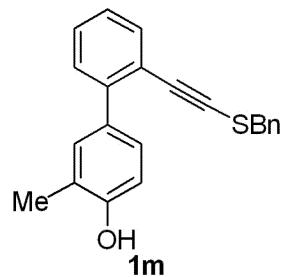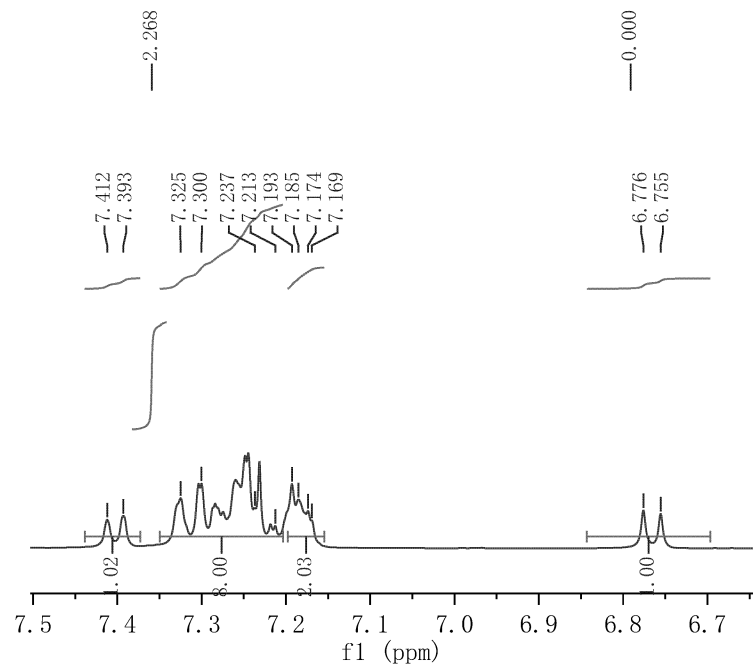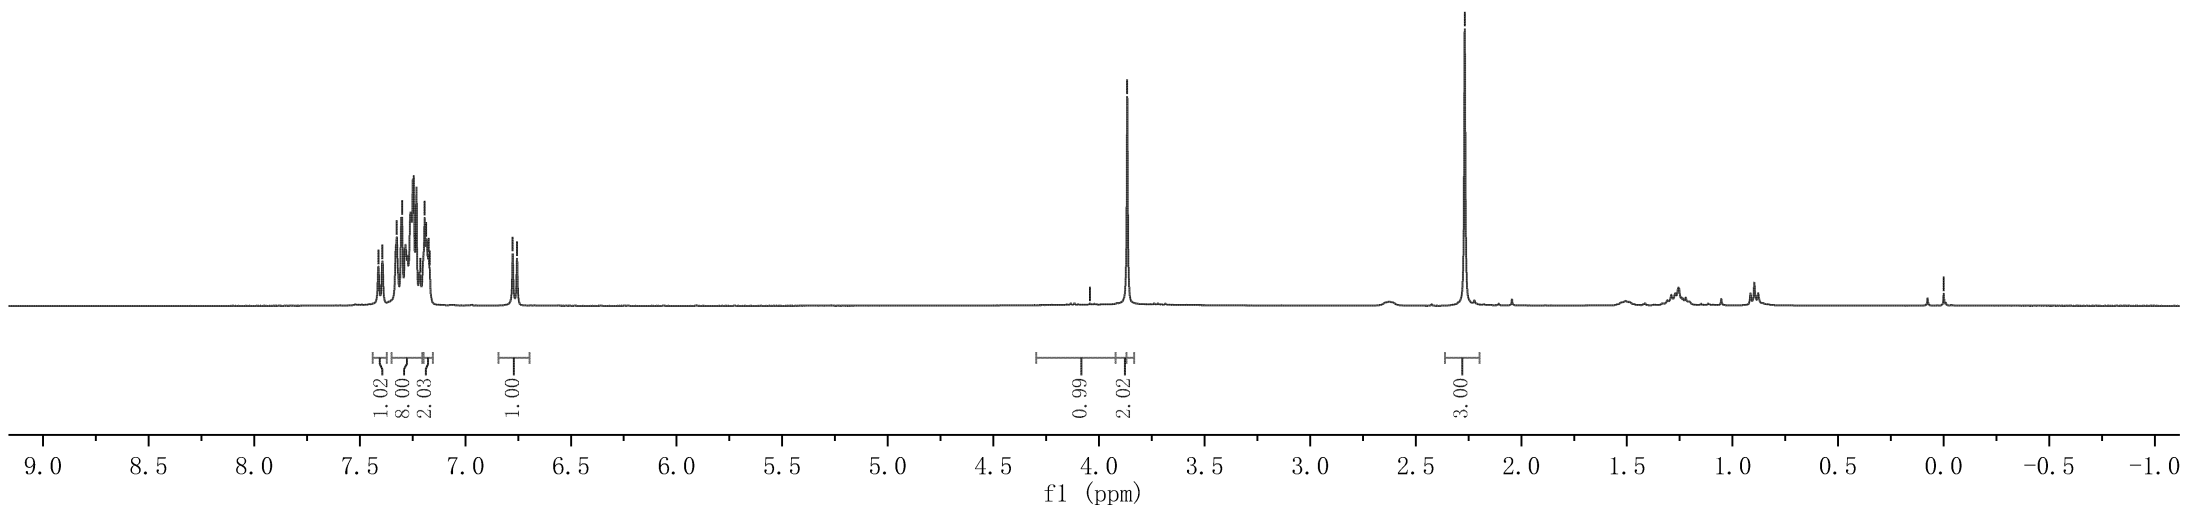

| Parameter                | Value               |
|--------------------------|---------------------|
| 1 Title                  | 1m-C-FXY-4-234-c'   |
| 2 Origin                 | Bruker BioSpin GmbH |
| 3 Solvent                | CDC13               |
| 4 Temperature            | 300.0               |
| 5 Number of Scans        | 23                  |
| 6 Acquisition Time       | 1.3631              |
| 7 Acquisition Date       | 2021-05-19T15:22:40 |
| 8 Spectrometer Frequency | 100.61              |
| 9 Spectral Width         | 24038.5             |

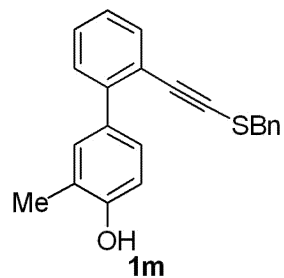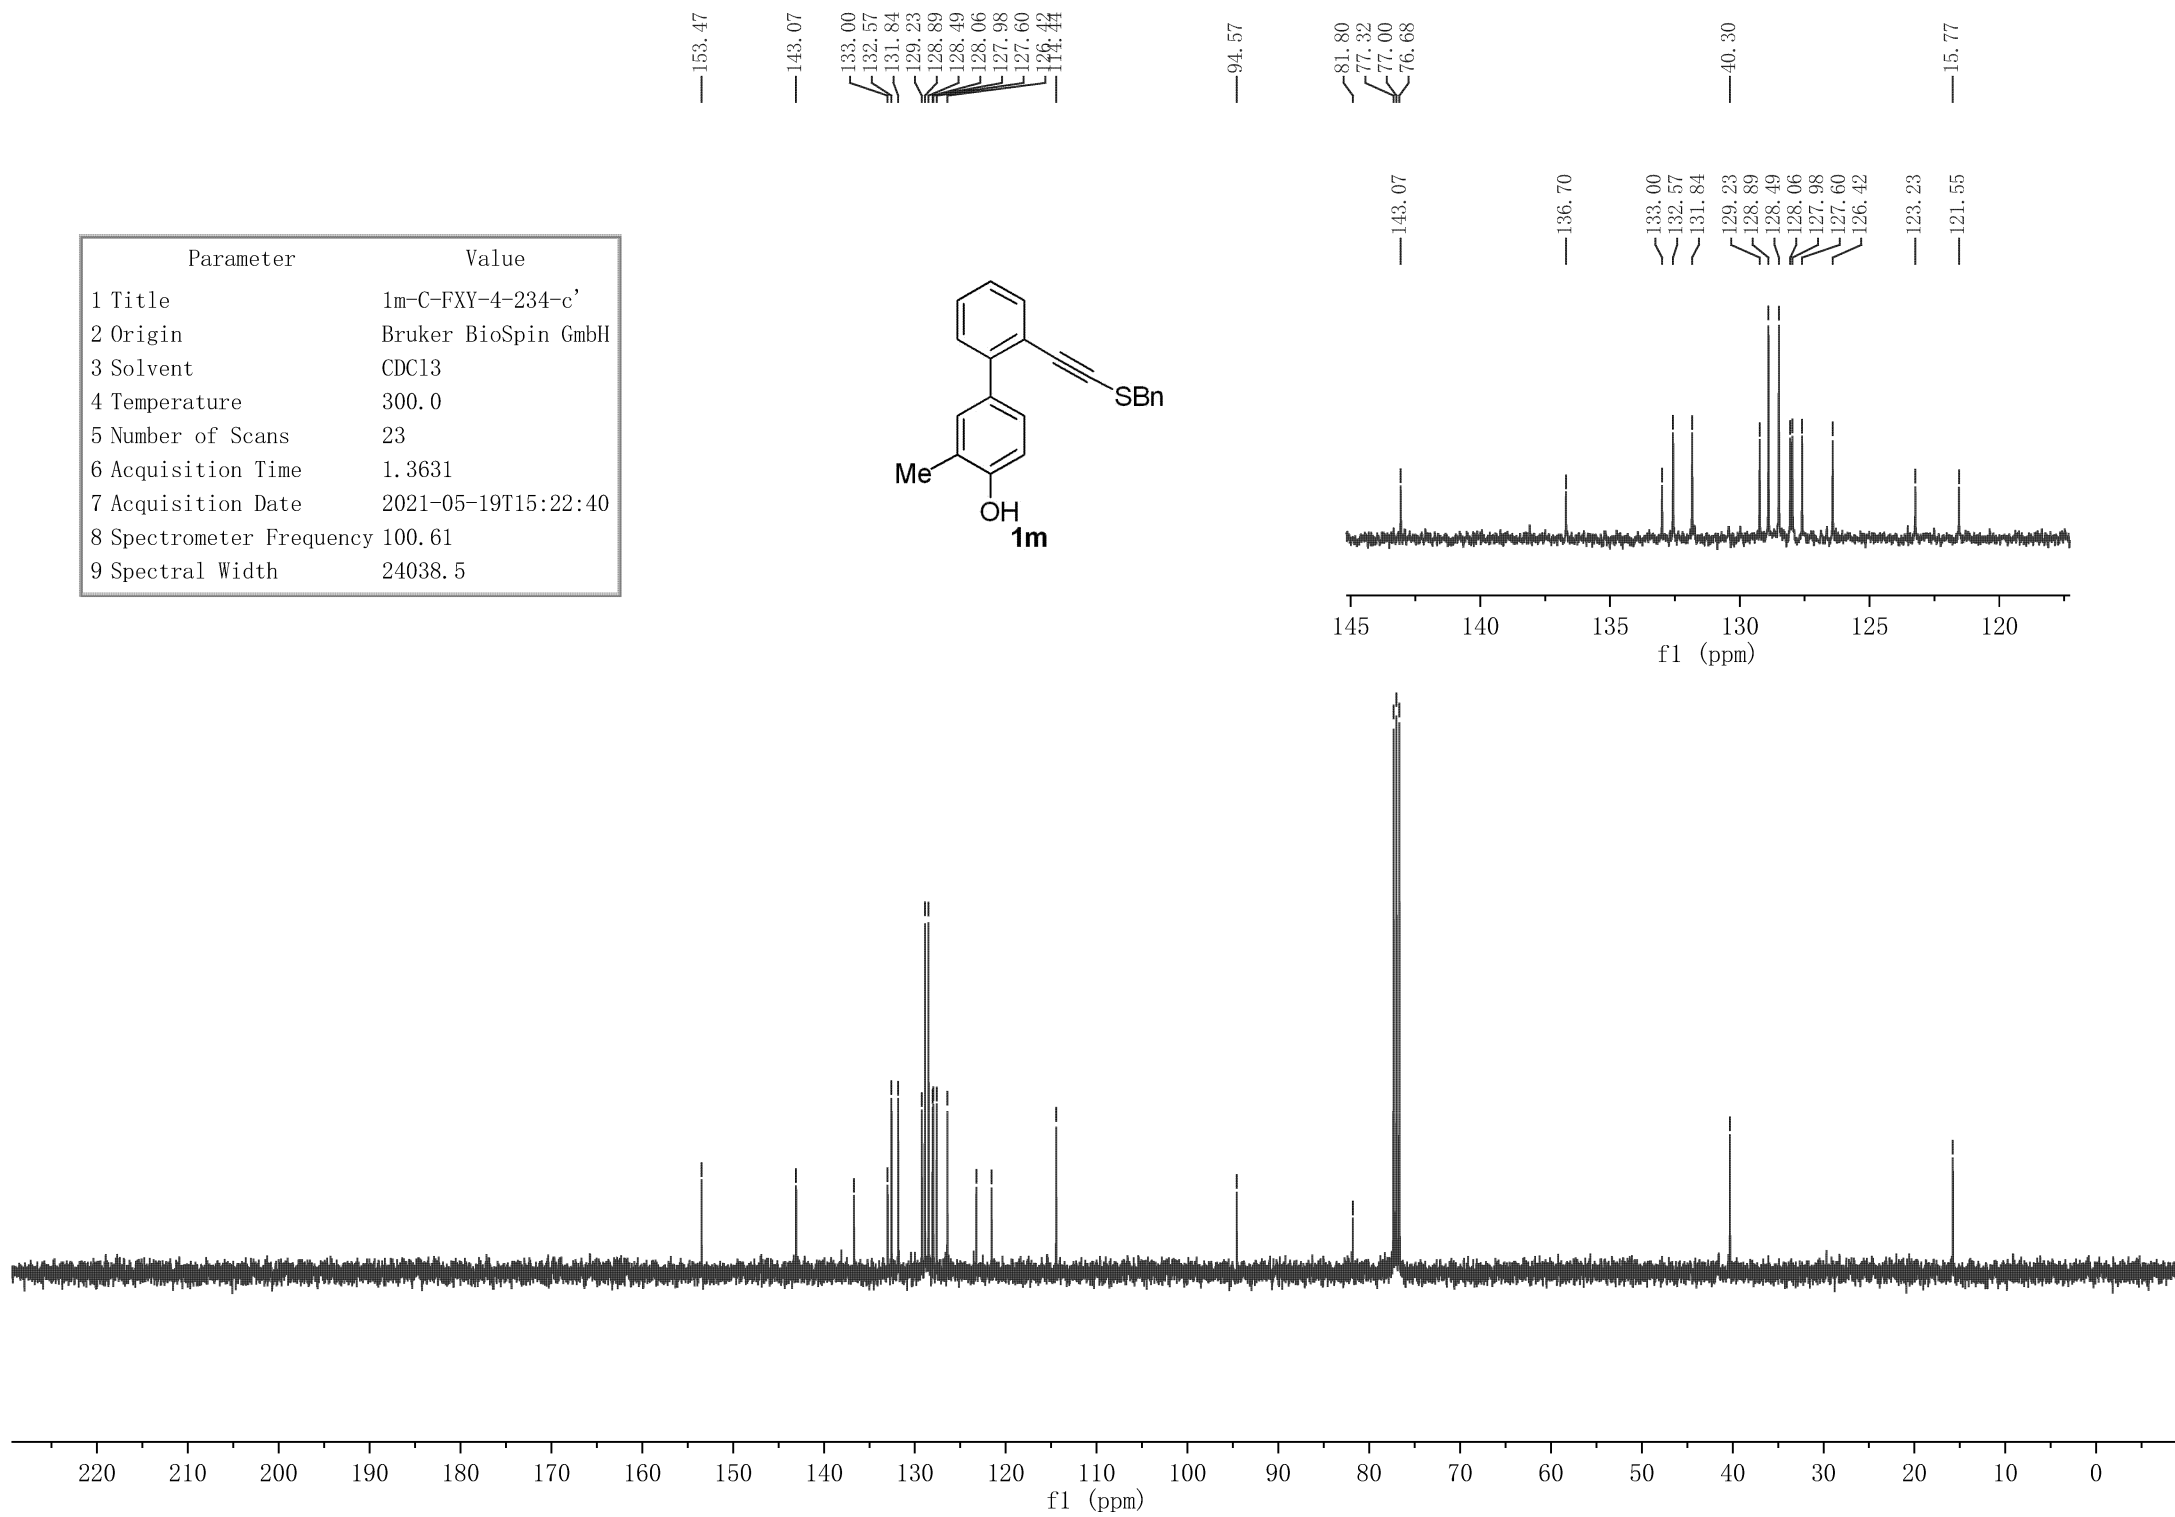

| Parameter                | Value               |
|--------------------------|---------------------|
| 1 Title                  | 1n-H-fxy-5-1        |
| 2 Origin                 | Bruker BioSpin GmbH |
| 3 Solvent                | CDCl3               |
| 4 Temperature            | 298.0               |
| 5 Number of Scans        | 20                  |
| 6 Acquisition Time       | 4.0894              |
| 7 Acquisition Date       | 2021-05-21T10:12:40 |
| 8 Spectrometer Frequency | 400.13              |
| 9 Spectral Width         | 8012.8              |

7.547  
7.528  
7.460  
7.457  
7.441  
7.438  
7.417  
7.399  
7.396  
7.377  
7.355  
7.342  
7.338  
7.326  
7.311  
7.297  
7.288  
7.273  
7.263  
7.259  
7.148  
7.143  
7.128  
7.123  
7.073  
7.052

5.418

3.947  
3.908

0.000

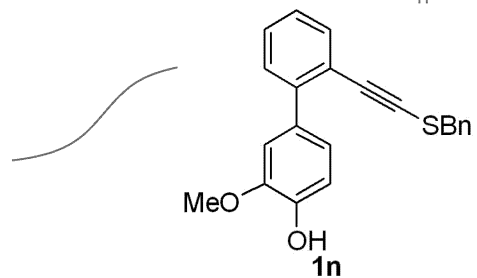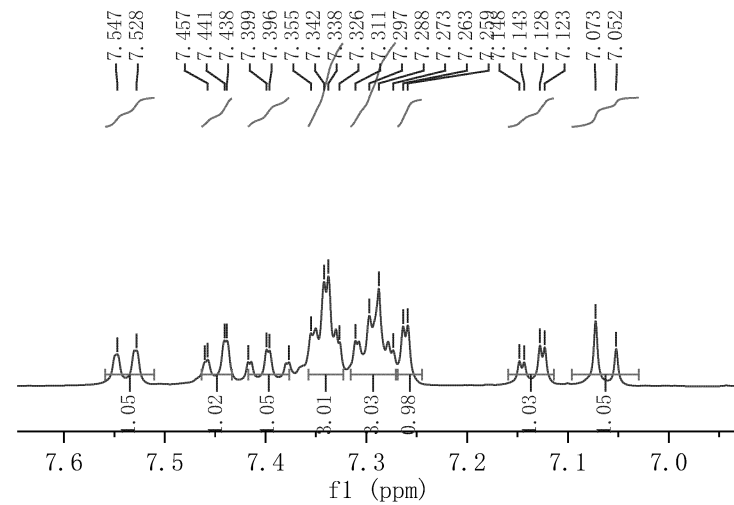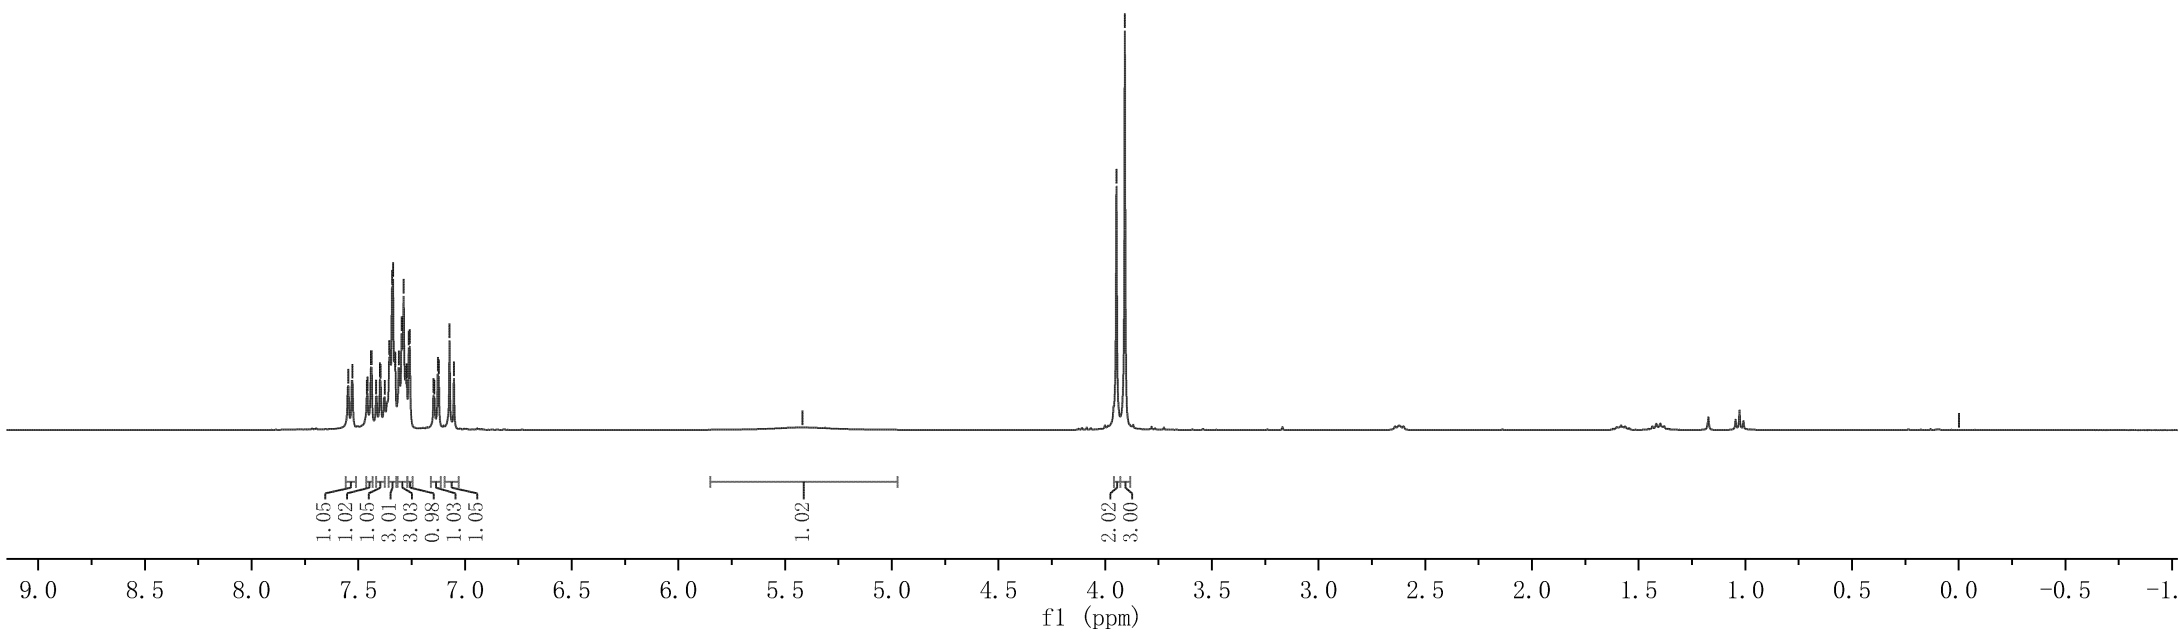

| Parameter                | Value               |
|--------------------------|---------------------|
| 1 Title                  | 1n-C-fxy-5-1-C      |
| 2 Origin                 | Bruker BioSpin GmbH |
| 3 Solvent                | CDC13               |
| 4 Temperature            | 300.0               |
| 5 Number of Scans        | 10                  |
| 6 Acquisition Time       | 1.3631              |
| 7 Acquisition Date       | 2021-05-21T10:15:11 |
| 8 Spectrometer Frequency | 100.61              |
| 9 Spectral Width         | 24038.5             |

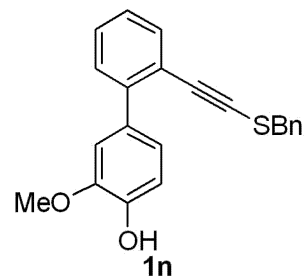

145.79, 145.18, 143.09, 136.56, 132.79, 132.44, 129.17, 128.78, 128.38, 128.16, 127.53, 126.46, 124.02, 112.01, 94.53, 81.88, 77.32, 77.00, 76.68

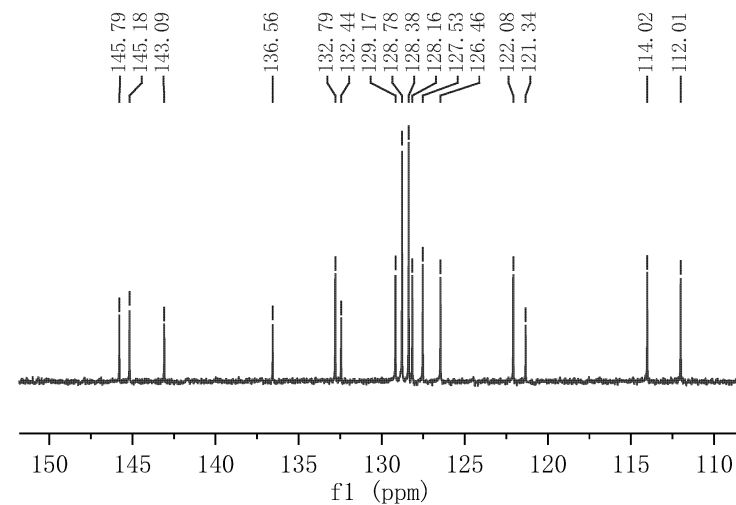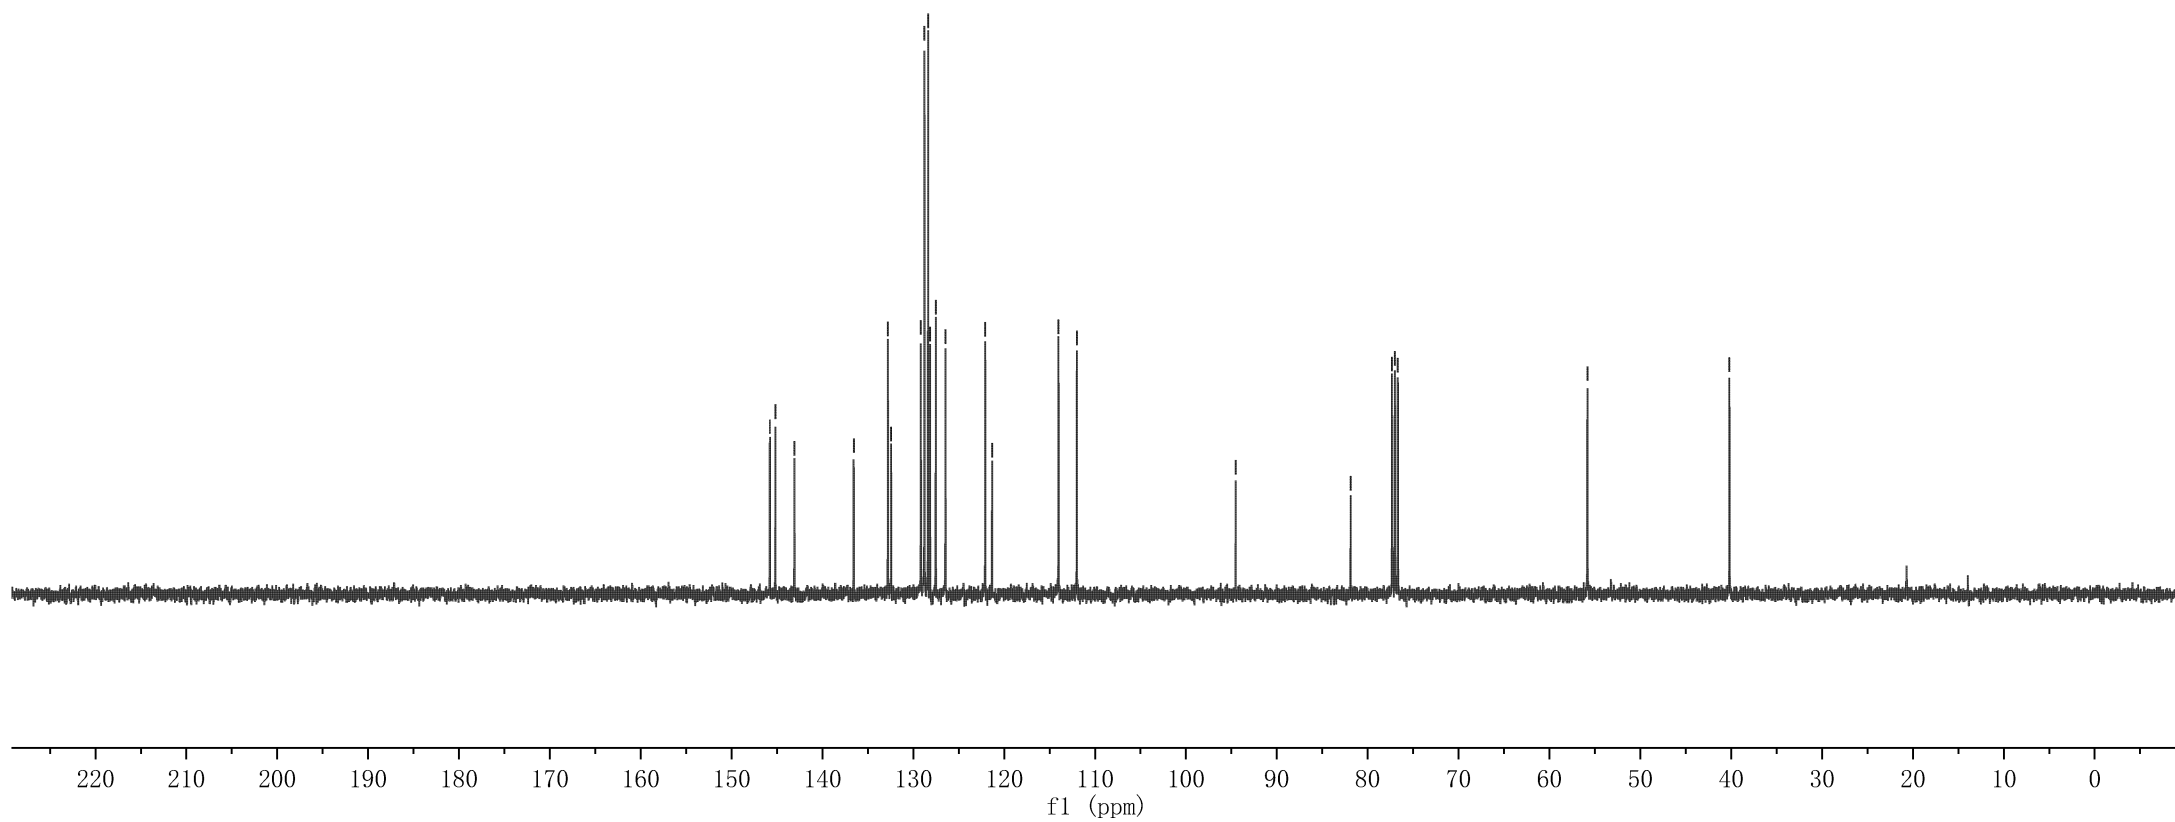

7.556  
7.552  
7.412  
7.393  
7.327  
7.322  
7.306  
7.301  
7.274  
7.241  
7.199  
7.180  
7.014  
6.993

5.113

3.892

0.000

| Parameter                | Value                |
|--------------------------|----------------------|
| 1 Title                  | 1o-III-fxy-4-238-new |
| 2 Origin                 | Bruker BioSpin GmbH  |
| 3 Solvent                | CDCl3                |
| 4 Temperature            | 298.0                |
| 5 Number of Scans        | 14                   |
| 6 Acquisition Time       | 4.0894               |
| 7 Acquisition Date       | 2021-05-21T09:57:23  |
| 8 Spectrometer Frequency | 400.13               |
| 9 Spectral Width         | 8012.8               |

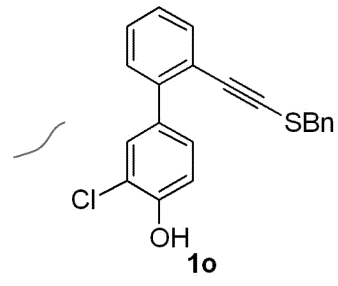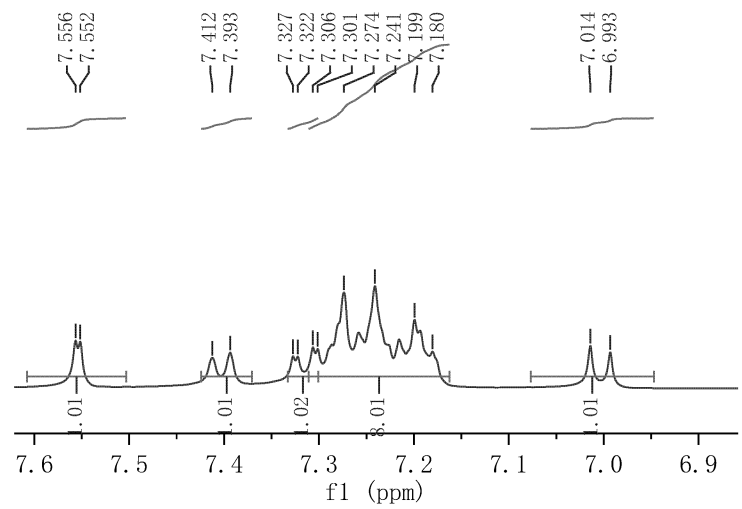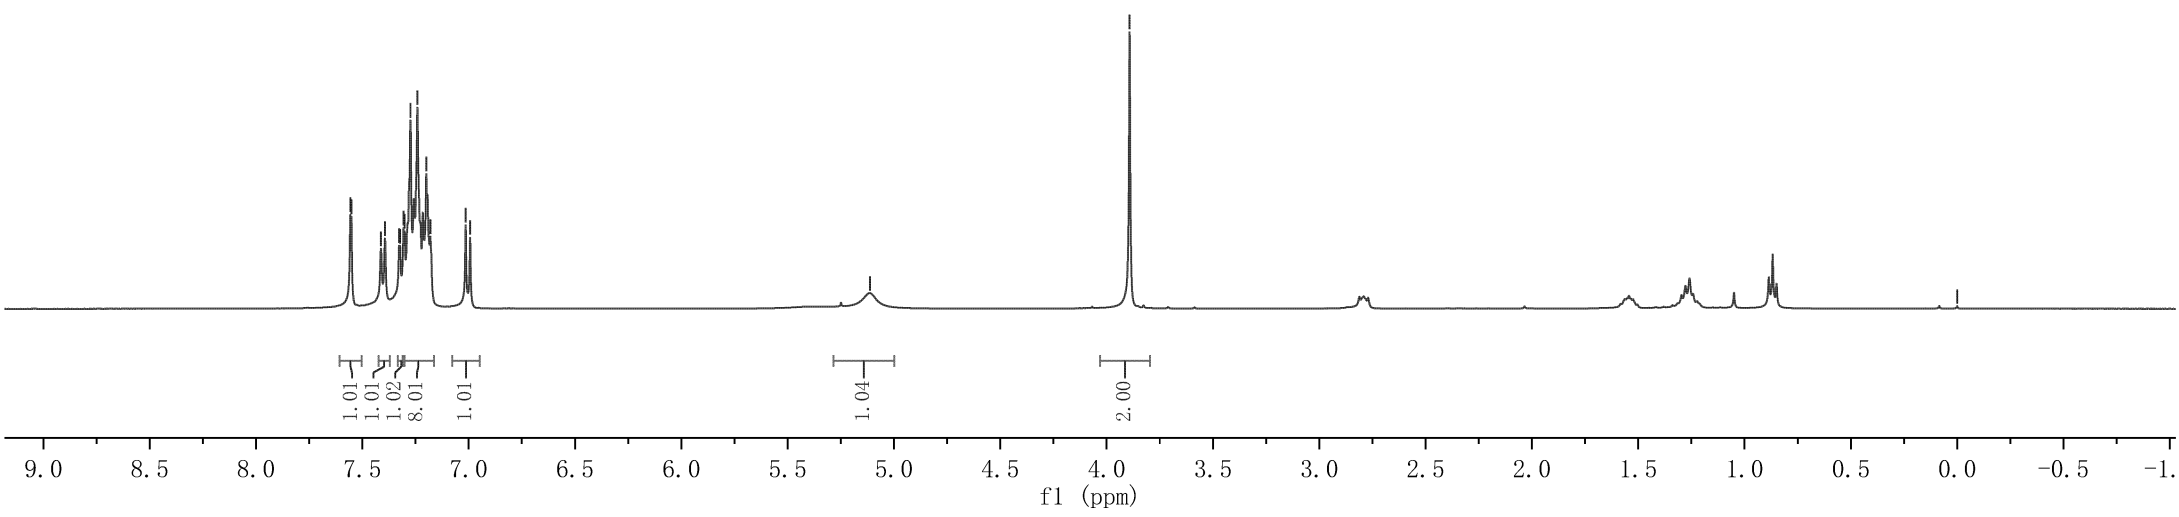

| Parameter                | Value                |
|--------------------------|----------------------|
| 1 Title                  | 1o-C-fxy-4-238-new-C |
| 2 Origin                 | Bruker BioSpin GmbH  |
| 3 Solvent                | CDCl3                |
| 4 Temperature            | 300.0                |
| 5 Number of Scans        | 13                   |
| 6 Acquisition Time       | 1.3631               |
| 7 Acquisition Date       | 2021-05-21T09:59:35  |
| 8 Spectrometer Frequency | 100.61               |
| 9 Spectral Width         | 24038.5              |

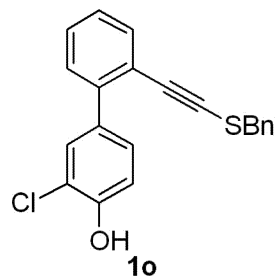

— 151.31  
 — 141.57  
 — 132.63  
 — 129.25  
 — 129.07  
 — 128.86  
 — 128.48  
 — 127.62  
 — 126.94  
 — 119.55  
 — 115.95

— 93.97

— 82.53  
 — 77.32  
 — 77.00  
 — 76.68

— 40.26

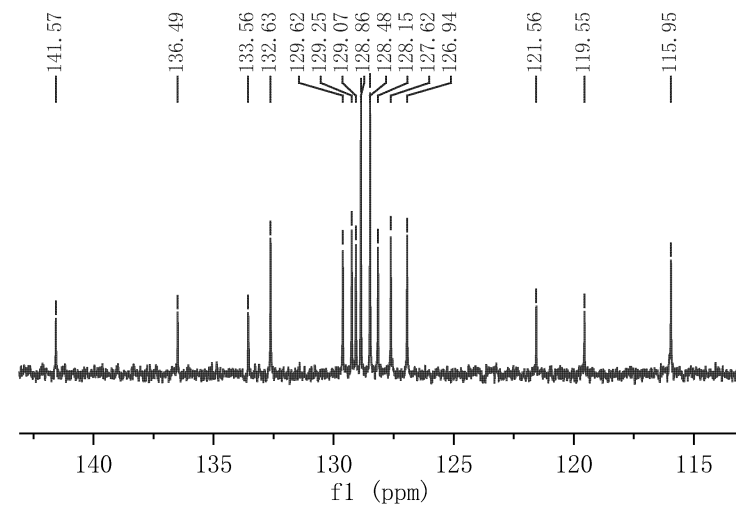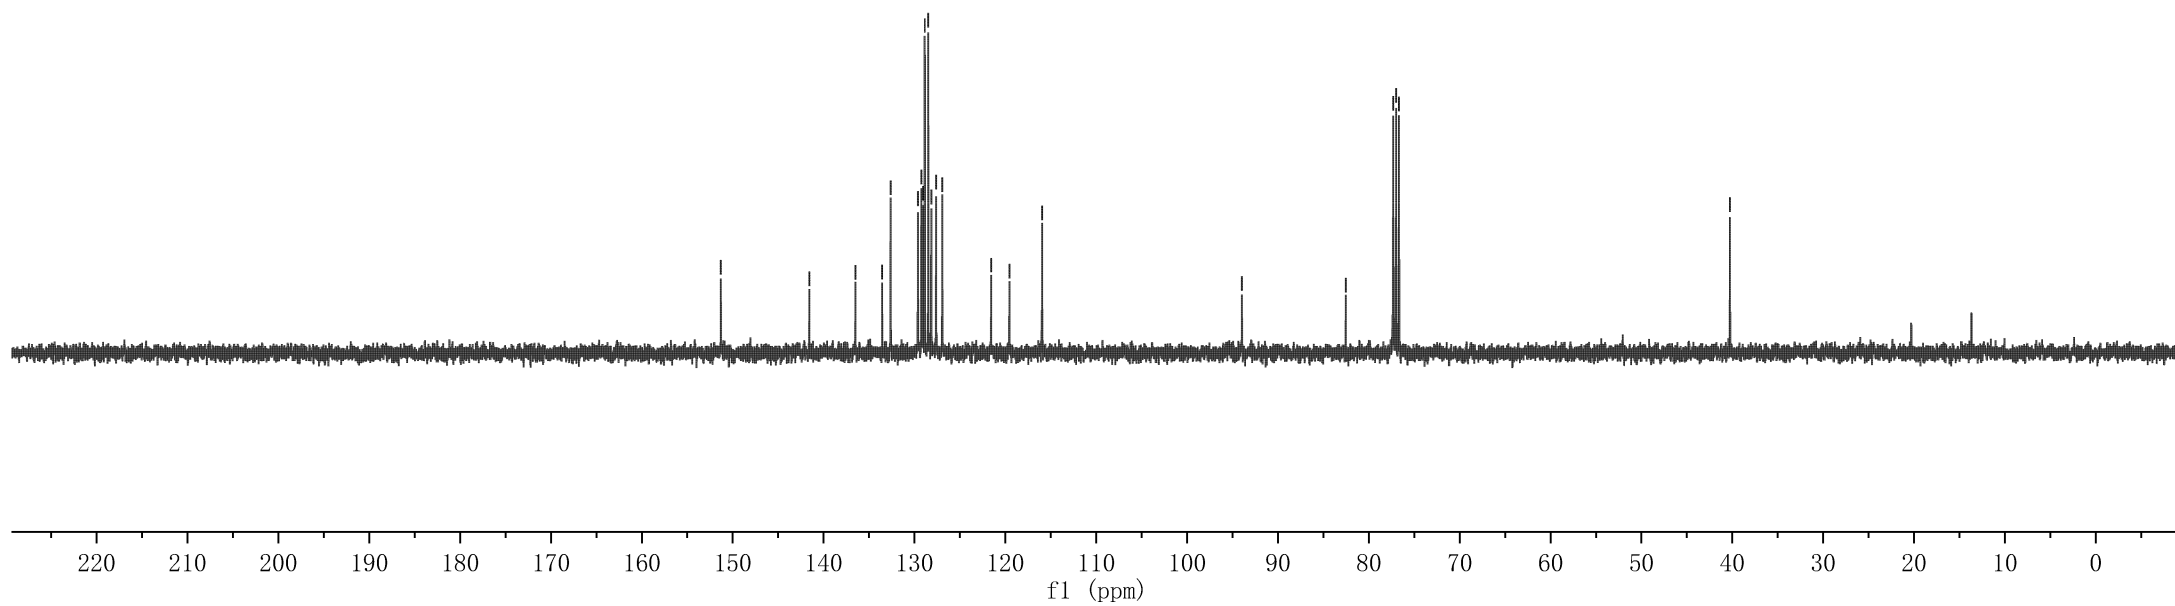

| Parameter                | Value               |
|--------------------------|---------------------|
| 1 Title                  | 2a-H-FXY-2-137-H    |
| 2 Origin                 | Bruker BioSpin GmbH |
| 3 Solvent                | MeOD                |
| 4 Temperature            | 298.0               |
| 5 Number of Scans        | 5                   |
| 6 Acquisition Time       | 4.0894              |
| 7 Acquisition Date       | 2020-06-19T22:17:48 |
| 8 Spectrometer Frequency | 400.13              |
| 9 Spectral Width         | 8012.8              |

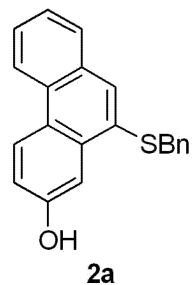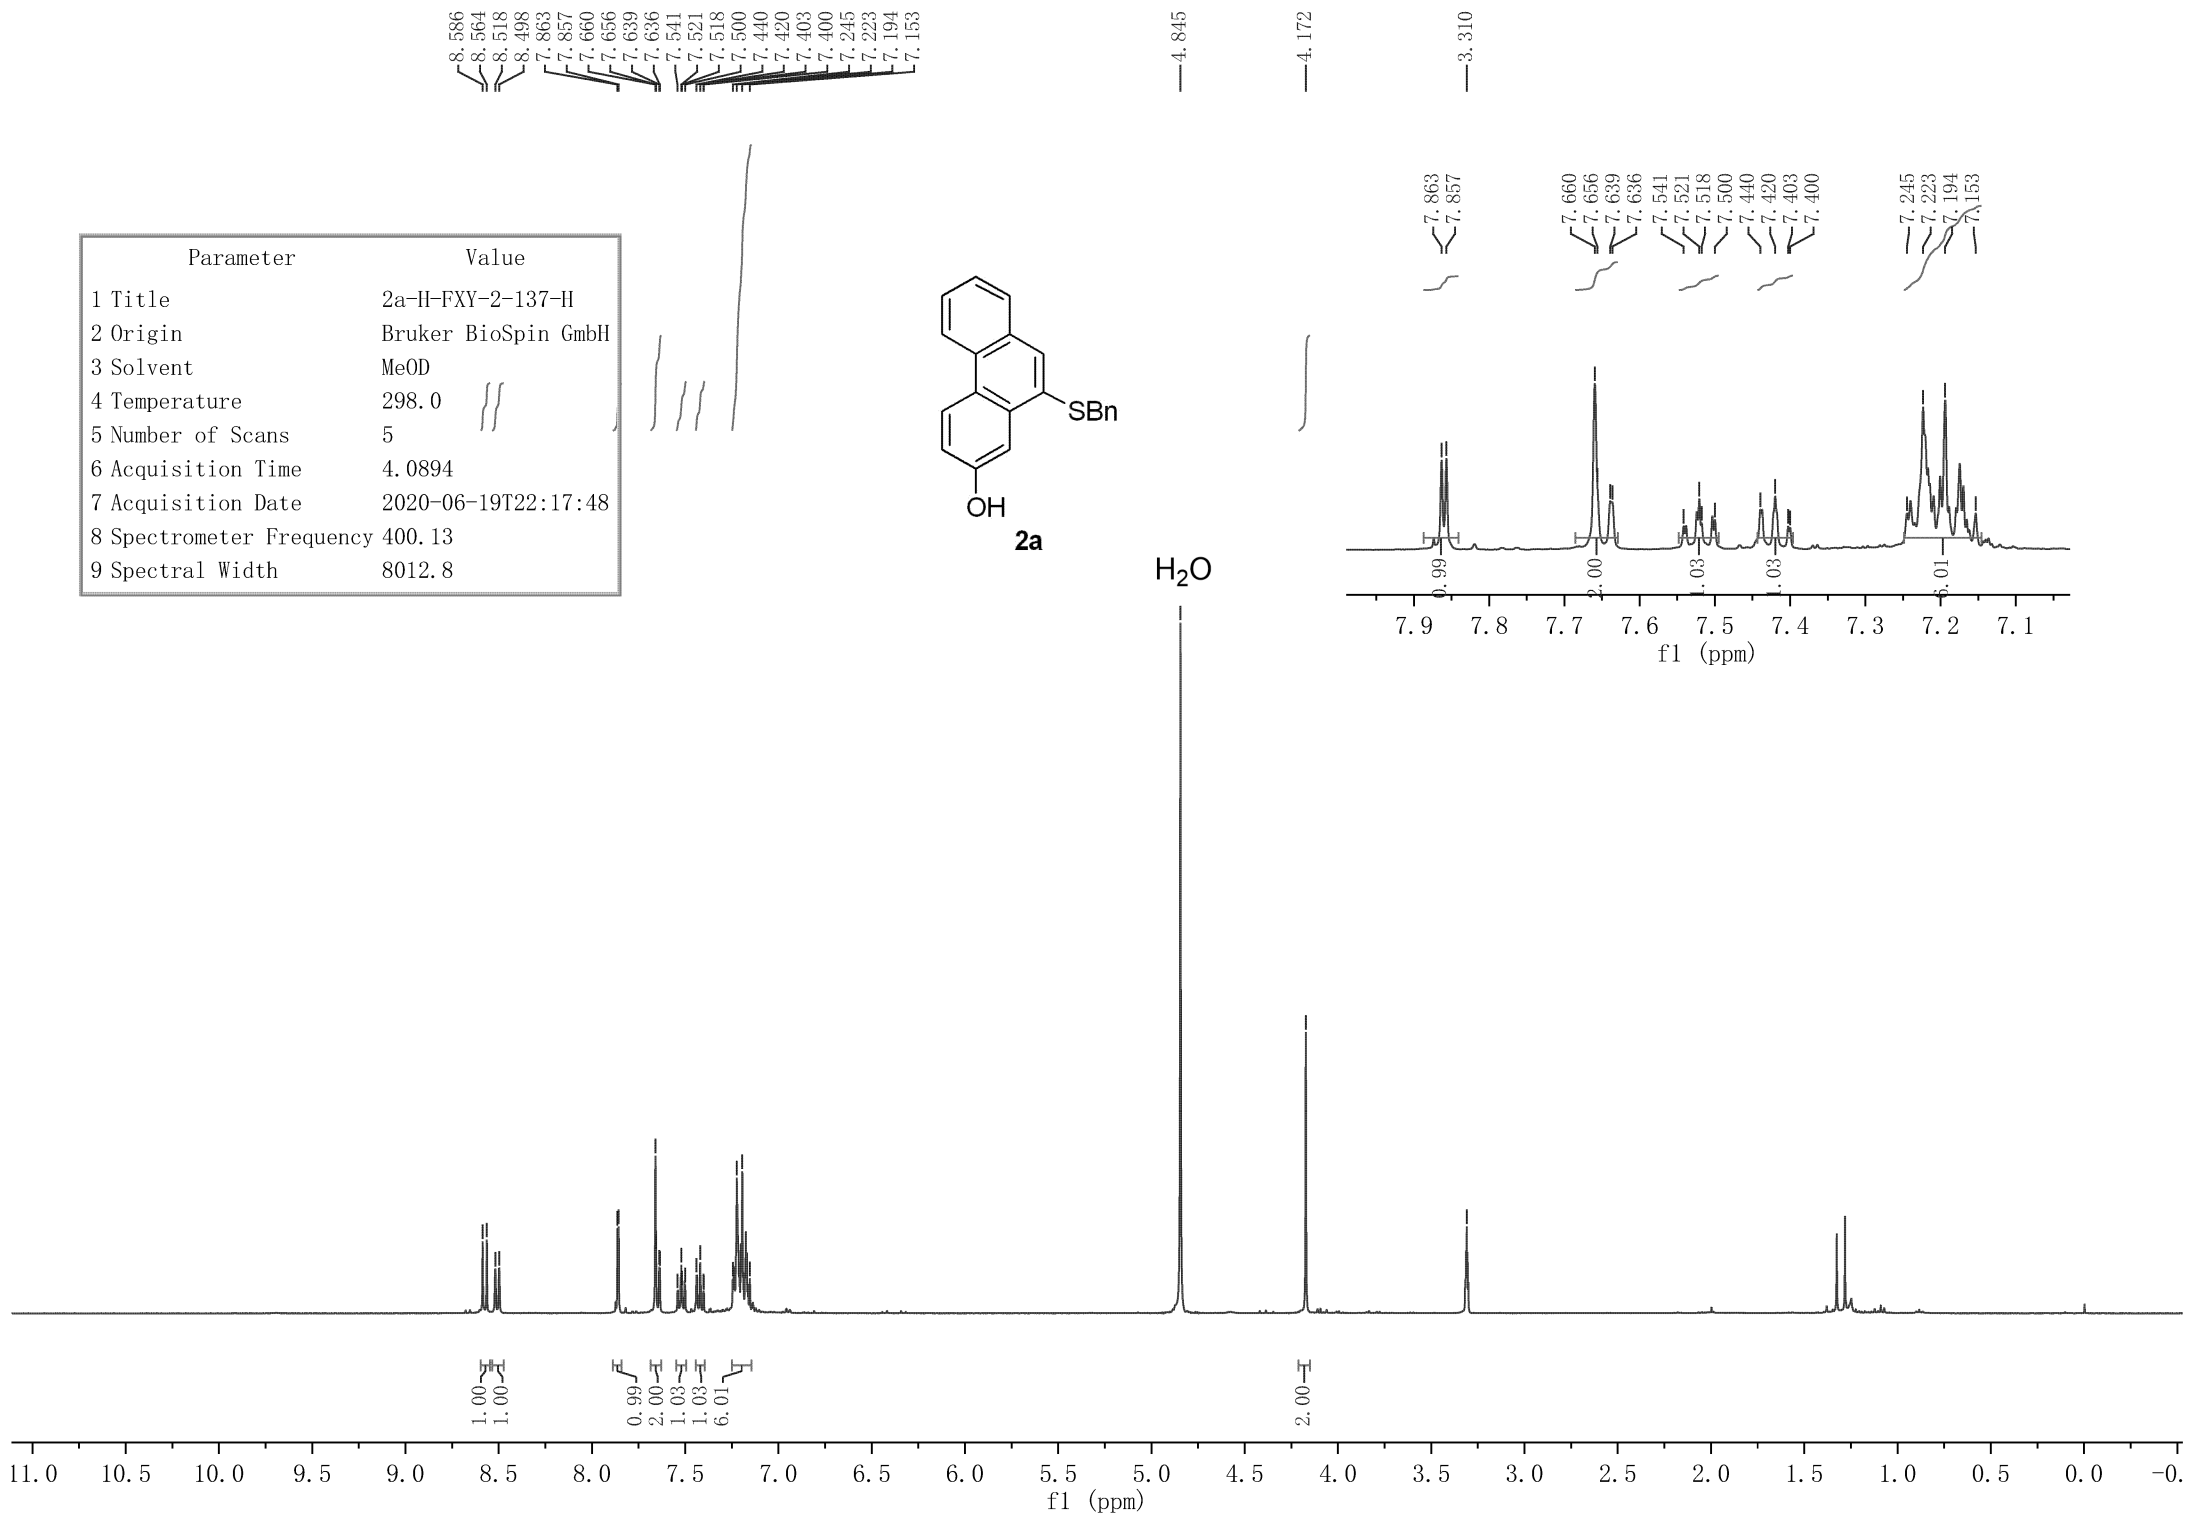



| Parameter                | Value               |
|--------------------------|---------------------|
| 1 Title                  | 2a-C_FXY-2-137      |
| 2 Origin                 | Bruker BioSpin GmbH |
| 3 Solvent                | MeOD                |
| 4 Temperature            | 300.0               |
| 5 Number of Scans        | 36                  |
| 6 Acquisition Time       | 1.3631              |
| 7 Acquisition Date       | 2020-06-19T22:19:53 |
| 8 Spectrometer Frequency | 100.61              |
| 9 Spectral Width         | 24038.5             |

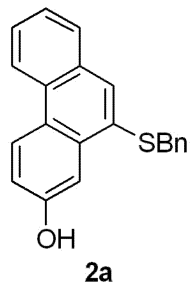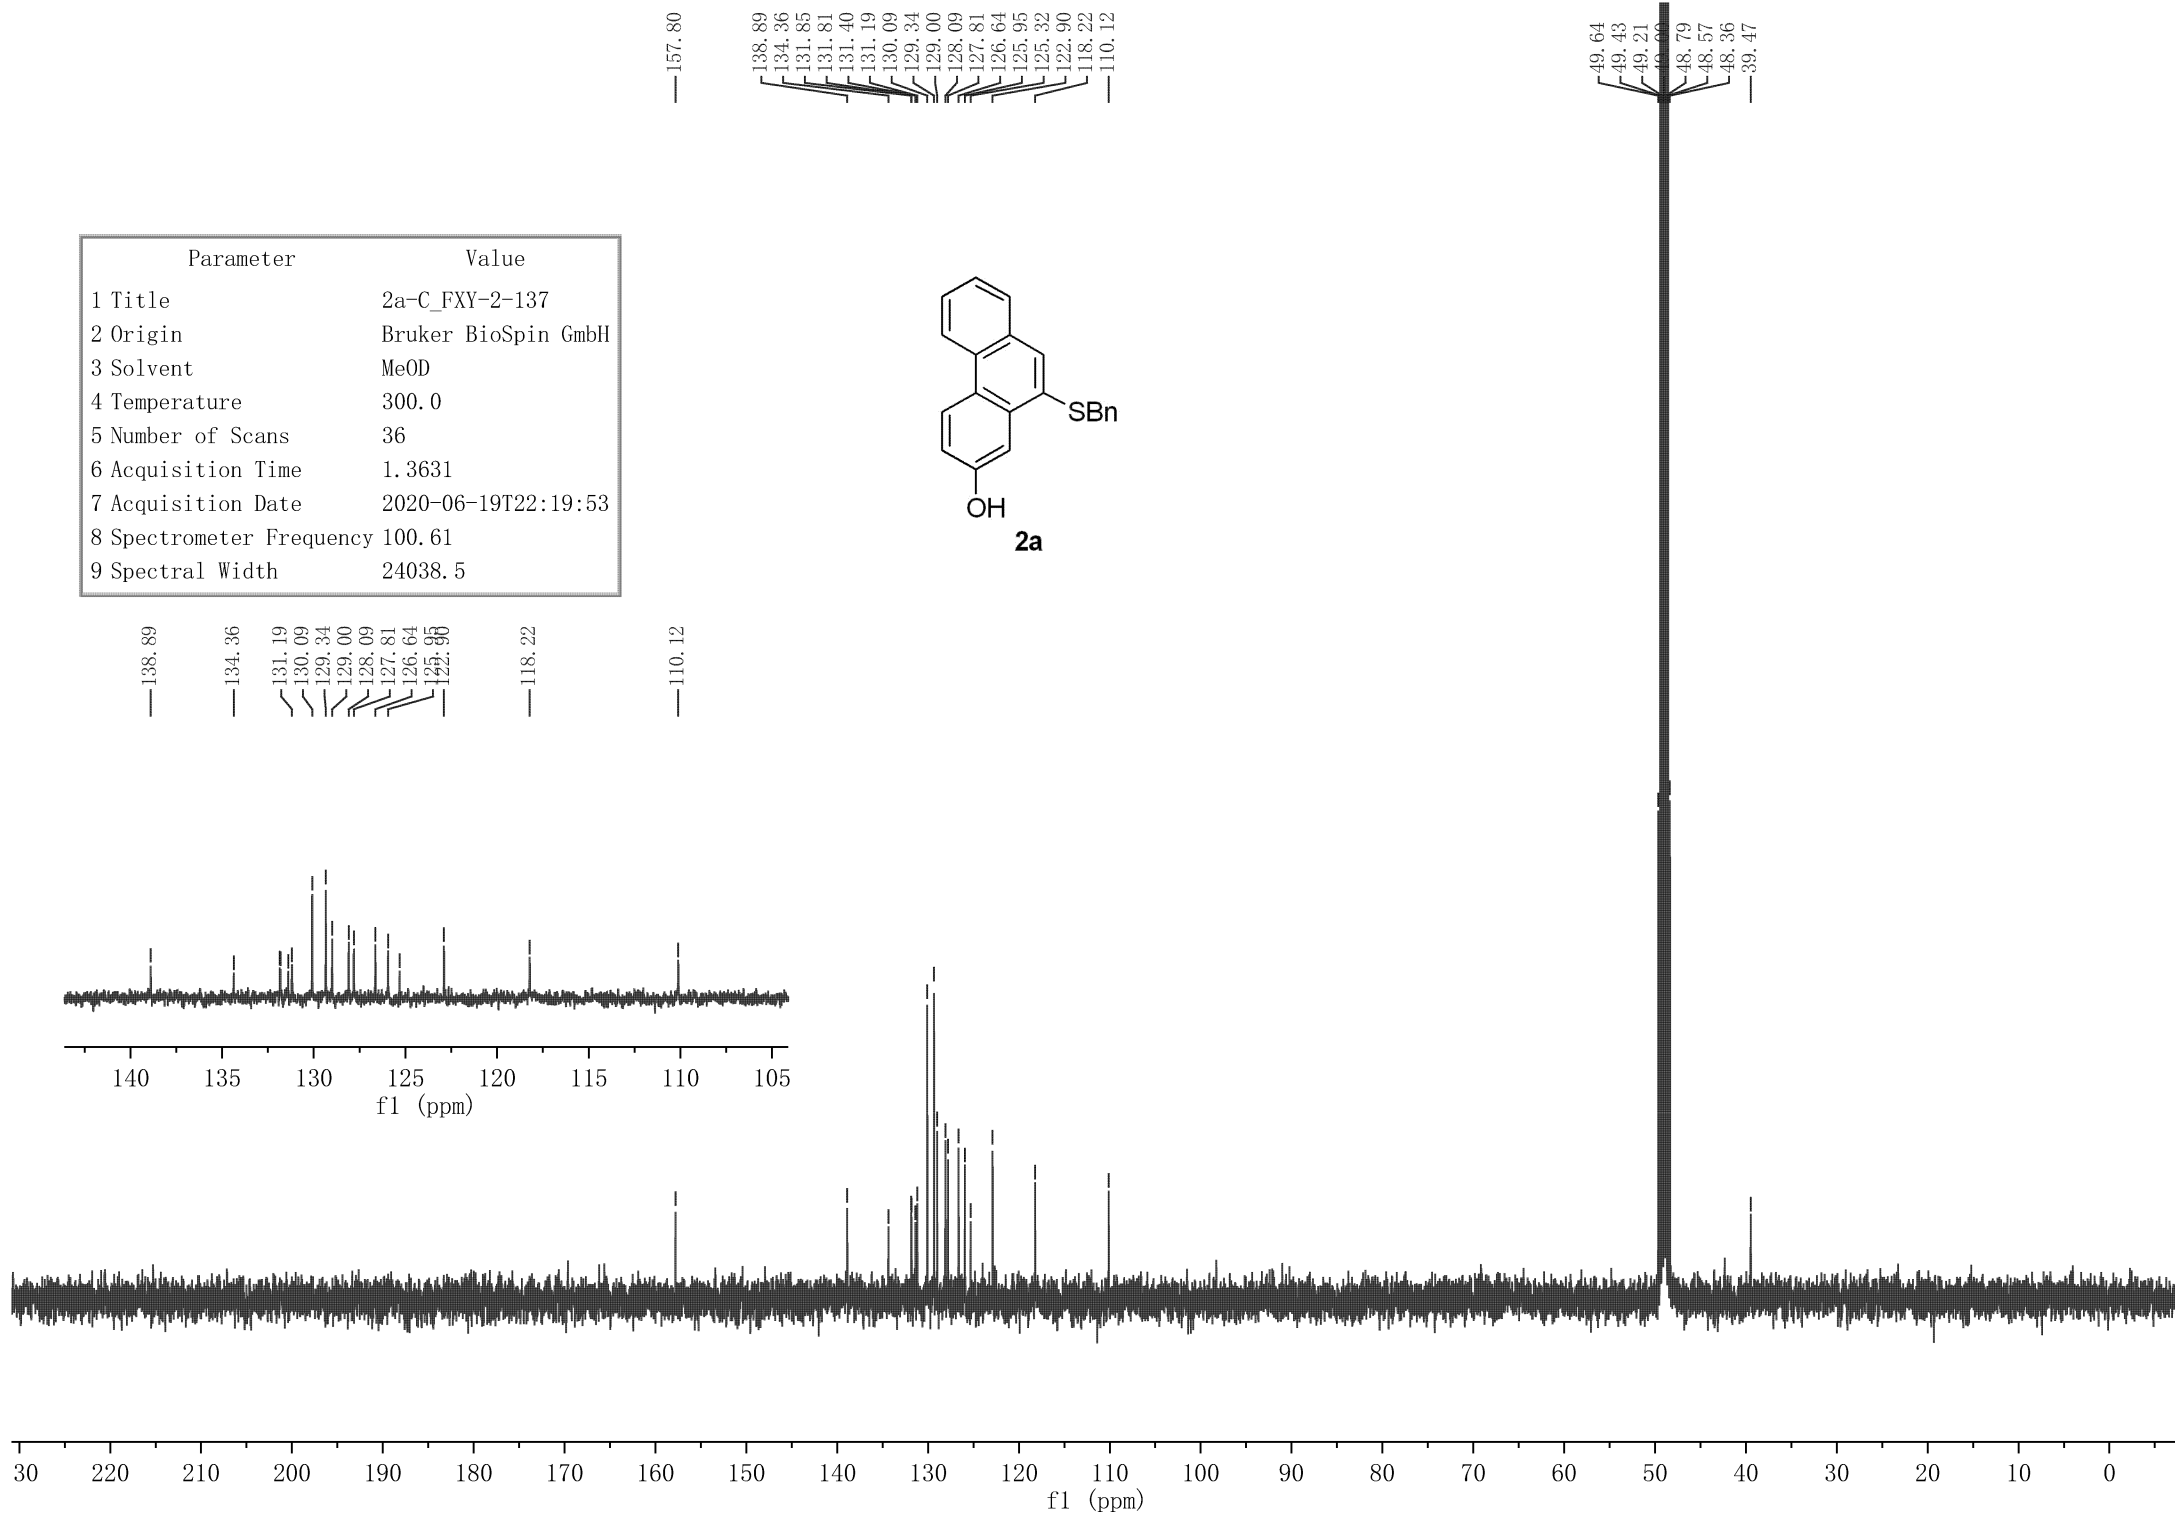

| Parameter                | Value               |
|--------------------------|---------------------|
| 1 Title                  | FXY-2adept          |
| 2 Origin                 |                     |
| 3 Solvent                | DMSO                |
| 4 Temperature            | 297.2               |
| 5 Number of Scans        | 200                 |
| 6 Acquisition Time       | 1.0001              |
| 7 Acquisition Date       | 2023-02-11T03:57:33 |
| 8 Spectrometer Frequency | 100.56              |
| 9 Spectral Width         | 18028.0             |

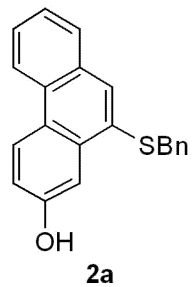

131.95  
131.36  
130.62  
130.14  
129.58  
129.36  
128.71  
128.19  
124.91  
120.55

110.99

39.47

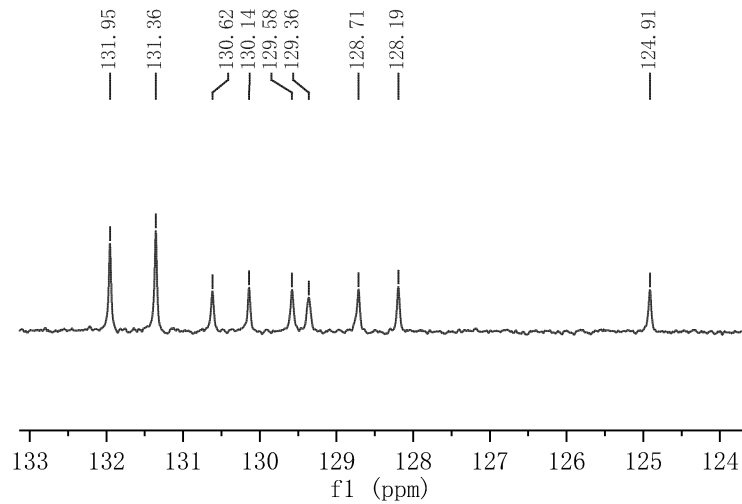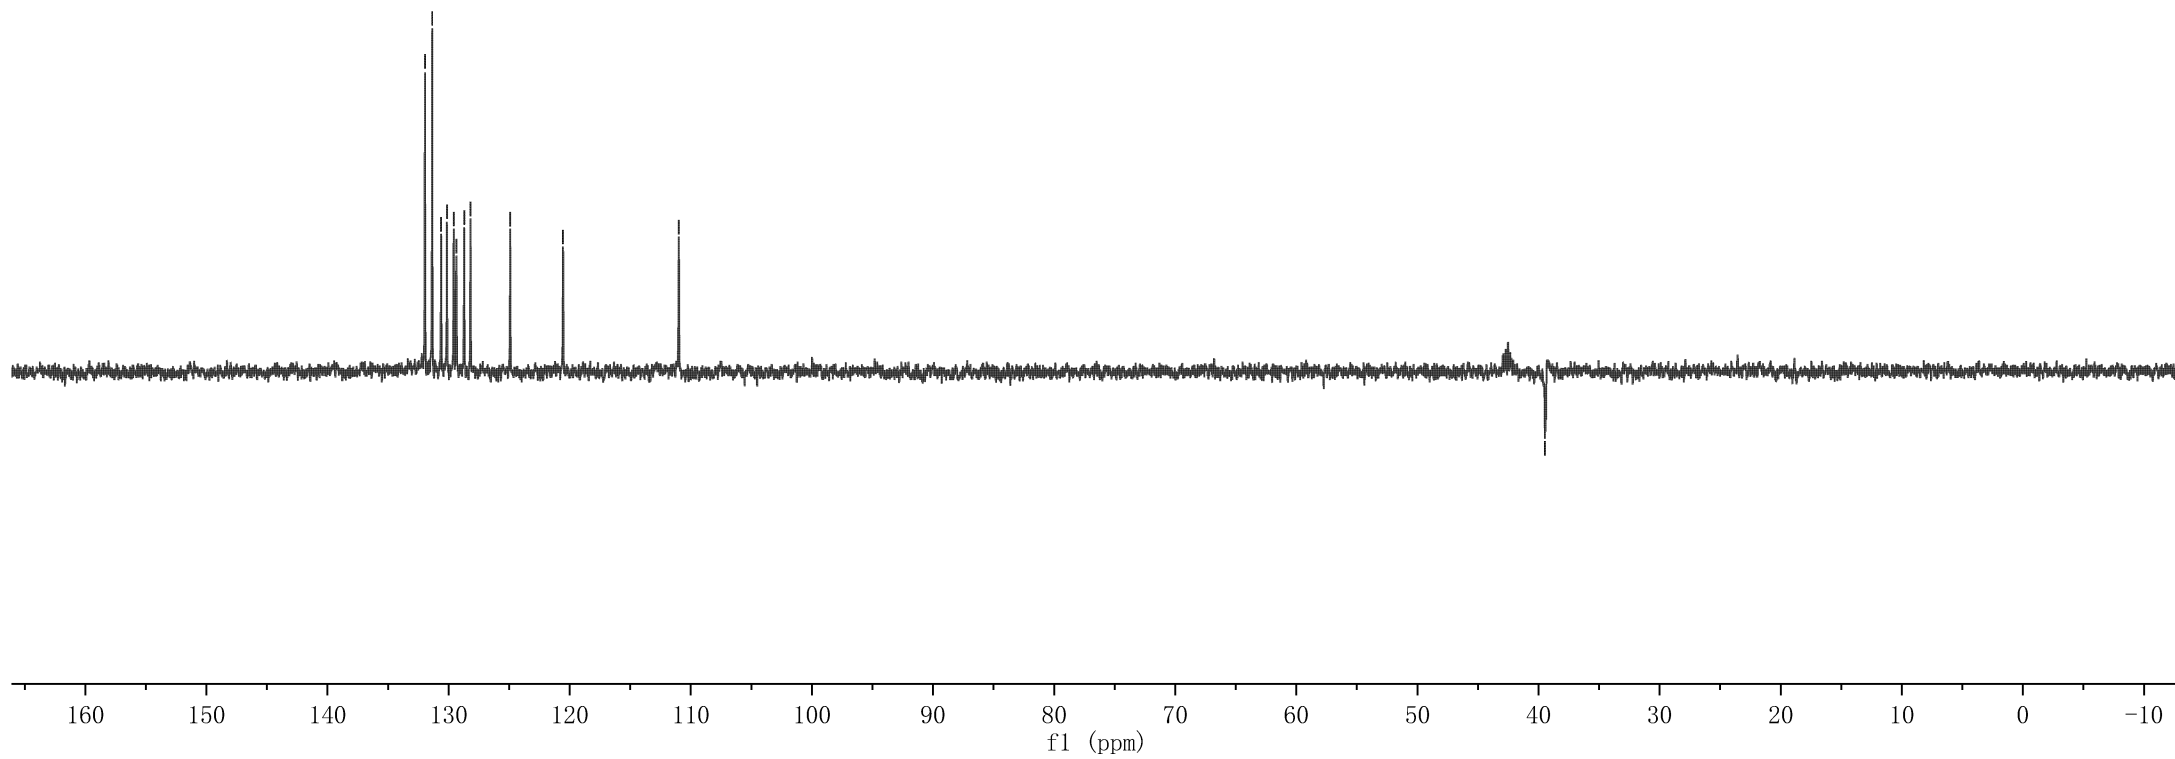

| Parameter                | Value               |
|--------------------------|---------------------|
| 1 Title                  | 2b-H-FXY-2-200-1    |
| 2 Origin                 | Bruker BioSpin GmbH |
| 3 Solvent                | DMSO                |
| 4 Temperature            | 298.0               |
| 5 Number of Scans        | 4                   |
| 6 Acquisition Time       | 4.0894              |
| 7 Acquisition Date       | 2020-07-13T16:28:39 |
| 8 Spectrometer Frequency | 400.13              |
| 9 Spectral Width         | 8012.8              |

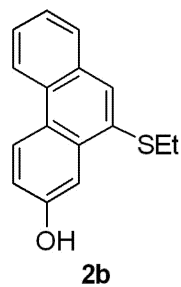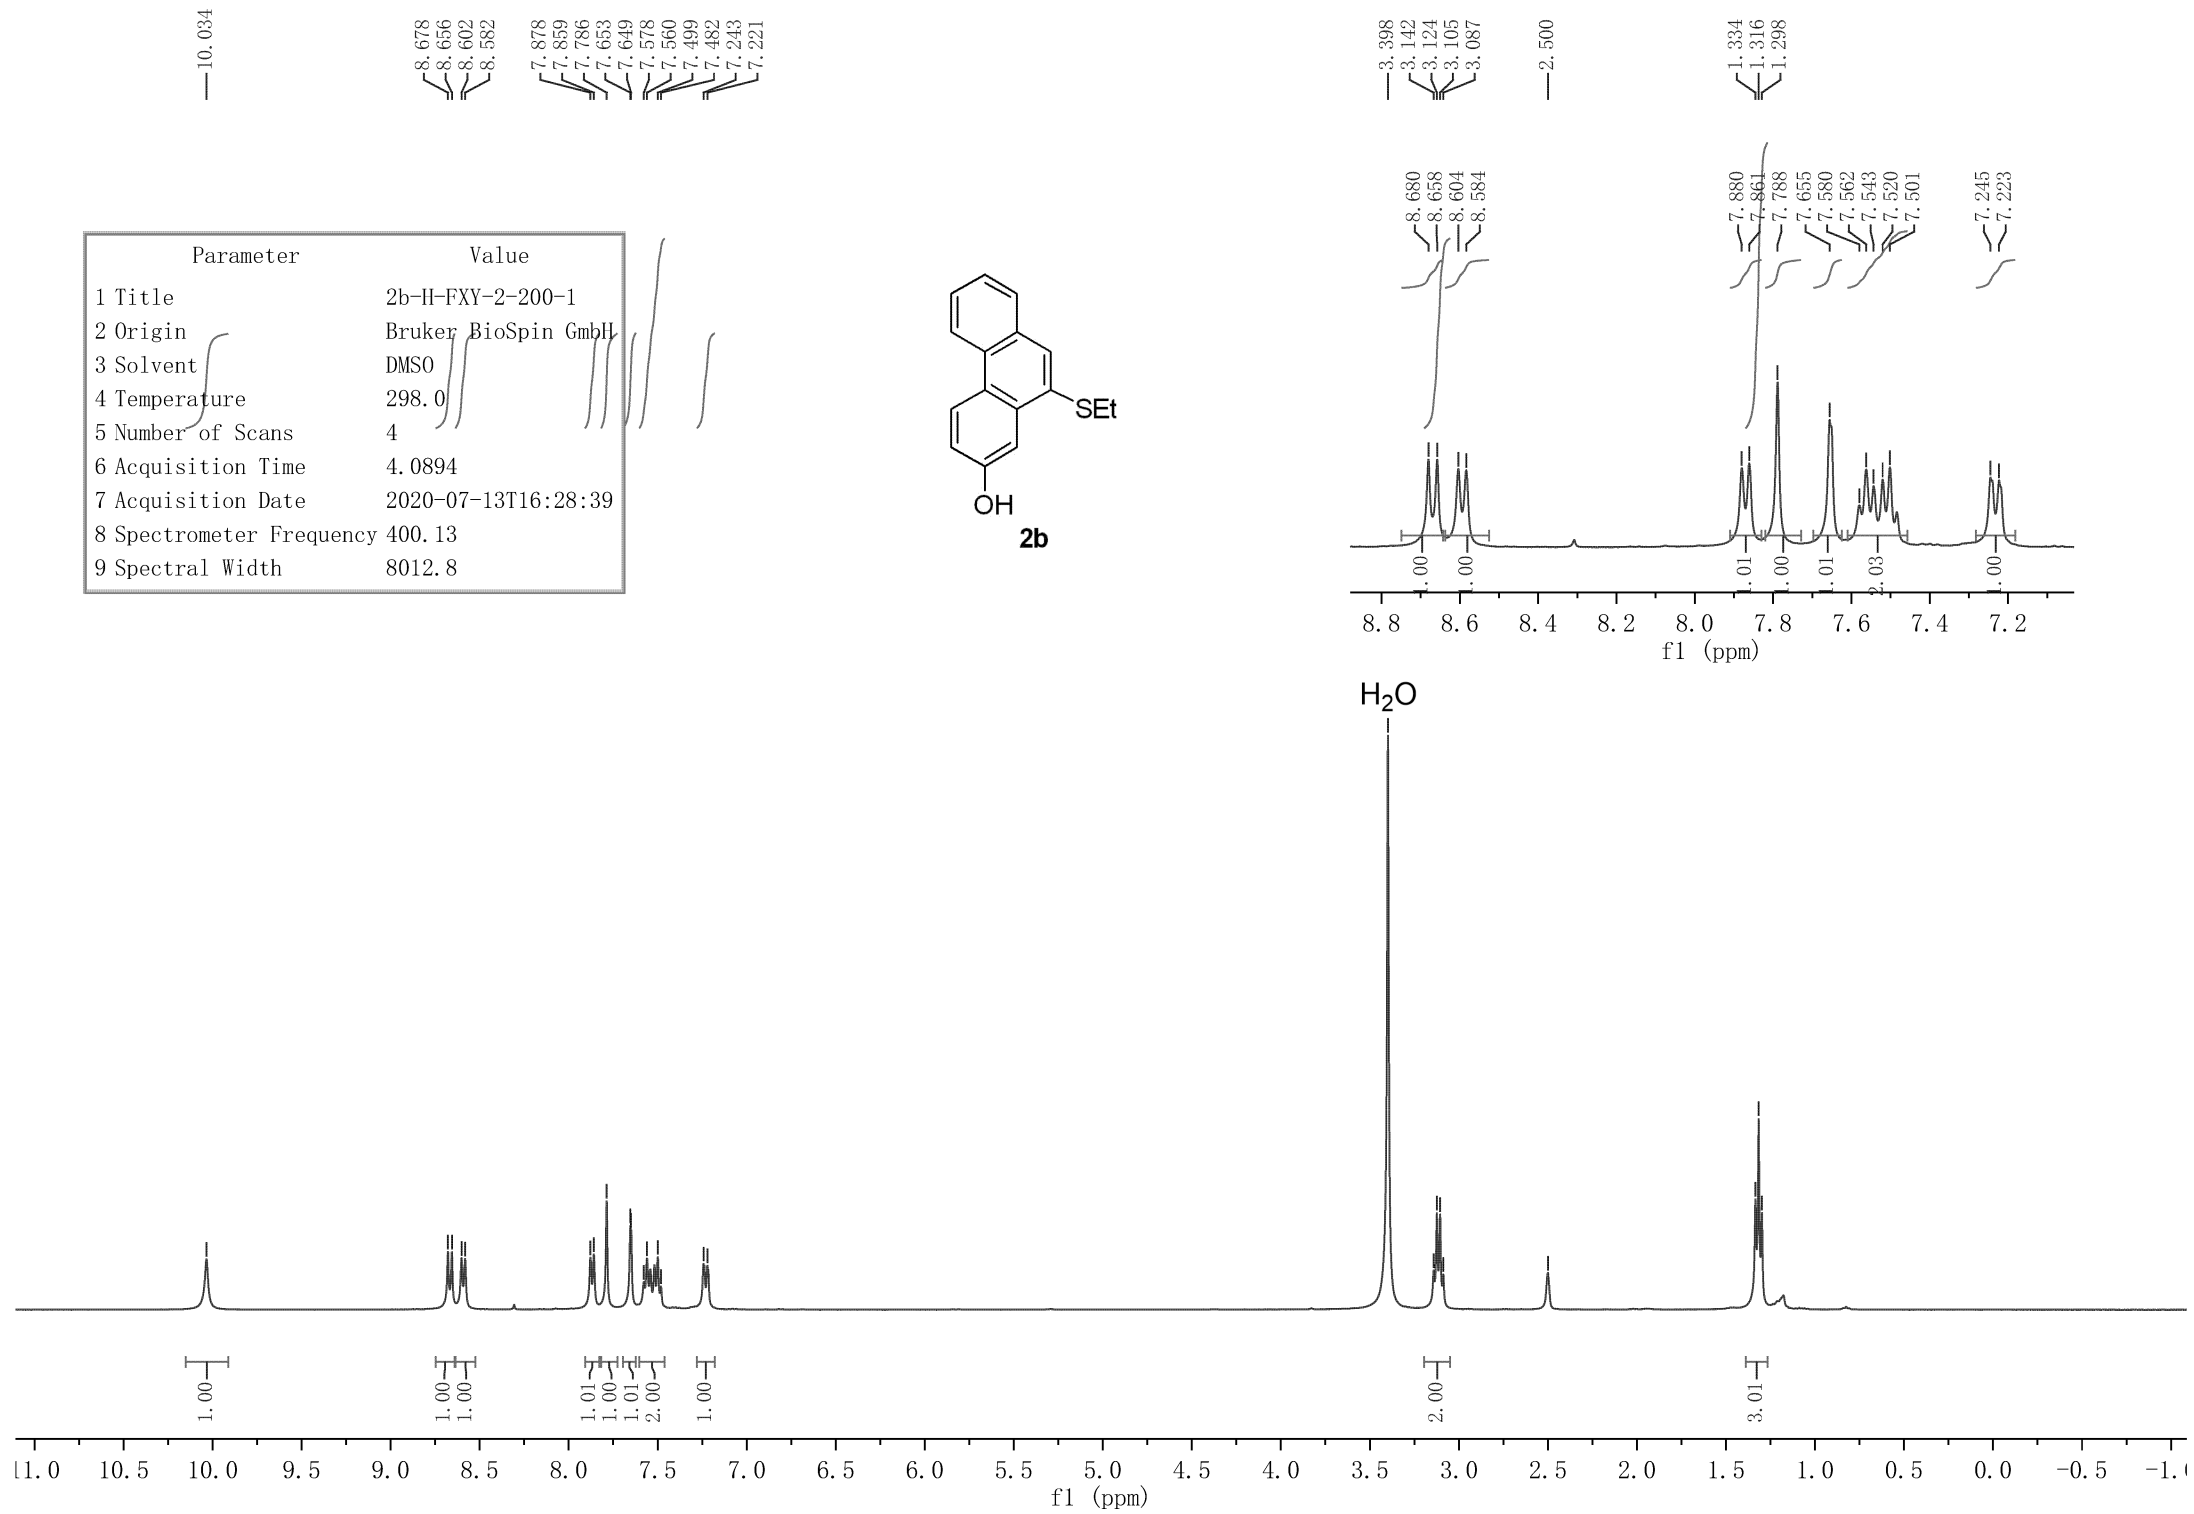

| Parameter                | Value               |
|--------------------------|---------------------|
| 1 Title                  | 2b-C-FXY-2-200-C    |
| 2 Origin                 | Bruker BioSpin GmbH |
| 3 Solvent                | DMSO                |
| 4 Temperature            | 300.0               |
| 5 Number of Scans        | 55                  |
| 6 Acquisition Time       | 1.3631              |
| 7 Acquisition Date       | 2020-07-14T14:43:07 |
| 8 Spectrometer Frequency | 100.61              |
| 9 Spectral Width         | 24038.5             |

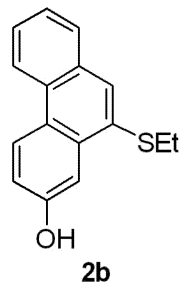

156.61  
 132.07, 130.84, 130.10, 128.93, 127.70, 126.48, 125.80, 125.71, 125.21, 122.98, 121.98, 117.60, 108.18  
 40.13, 39.92, 39.71, 39.50, 39.29, 39.08, 38.87  
 26.09  
 13.88

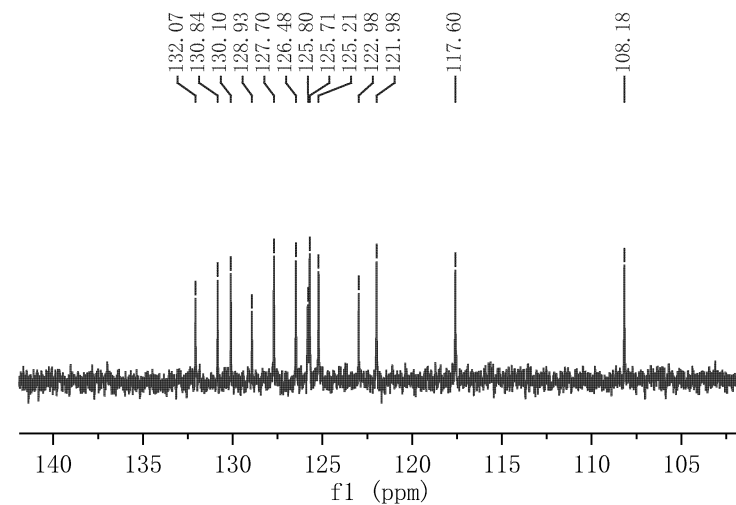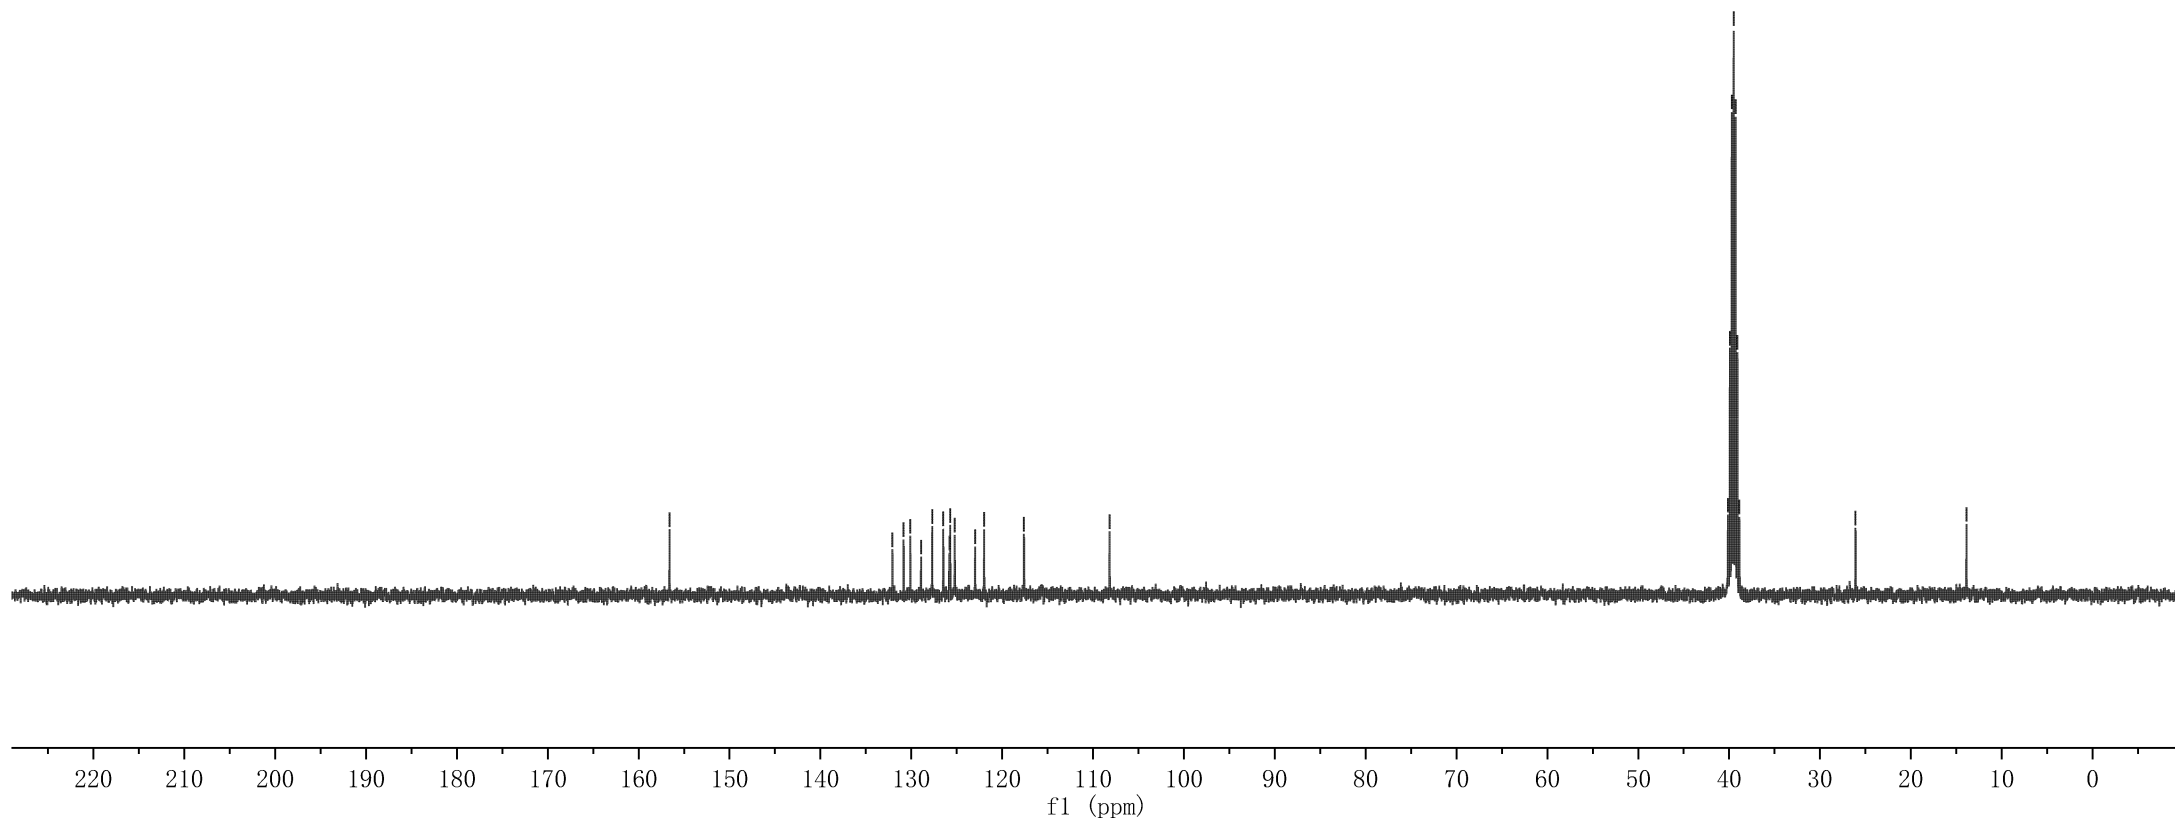

| Parameter                | Value               |
|--------------------------|---------------------|
| 1 Title                  | 2c-H-fxy-3-53       |
| 2 Origin                 | Bruker BioSpin GmbH |
| 3 Solvent                | DMSO                |
| 4 Temperature            | 298.0               |
| 5 Number of Scans        | 32                  |
| 6 Acquisition Time       | 4.0894              |
| 7 Acquisition Date       | 2021-05-17T15:53:26 |
| 8 Spectrometer Frequency | 400.13              |
| 9 Spectral Width         | 8012.8              |

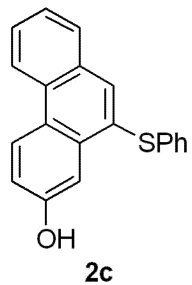

9.926  
 8.724  
 8.702  
 8.680  
 8.659  
 8.128  
 7.915  
 7.895  
 7.727  
 7.722  
 7.667  
 7.648  
 7.540  
 7.265  
 7.249  
 7.230  
 7.188  
 7.171  
 7.167  
 7.157

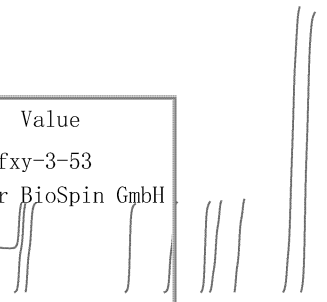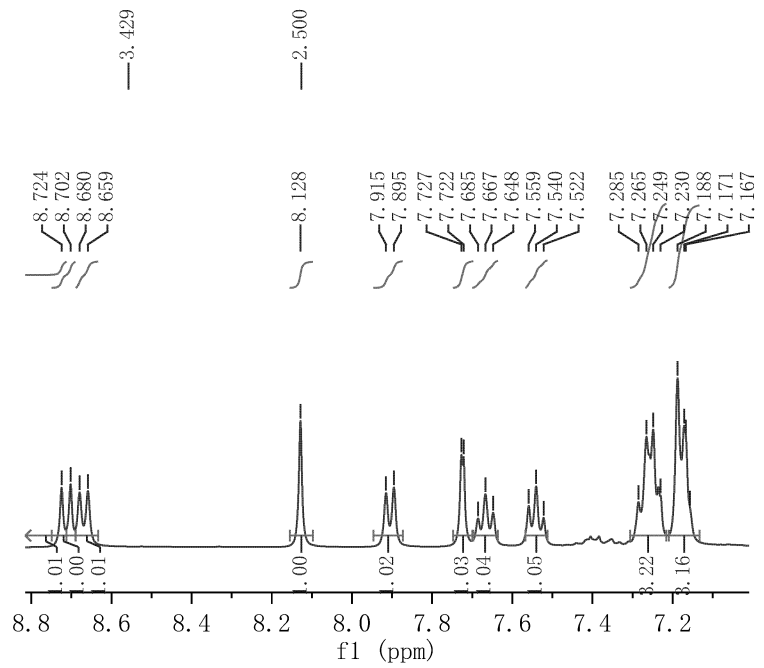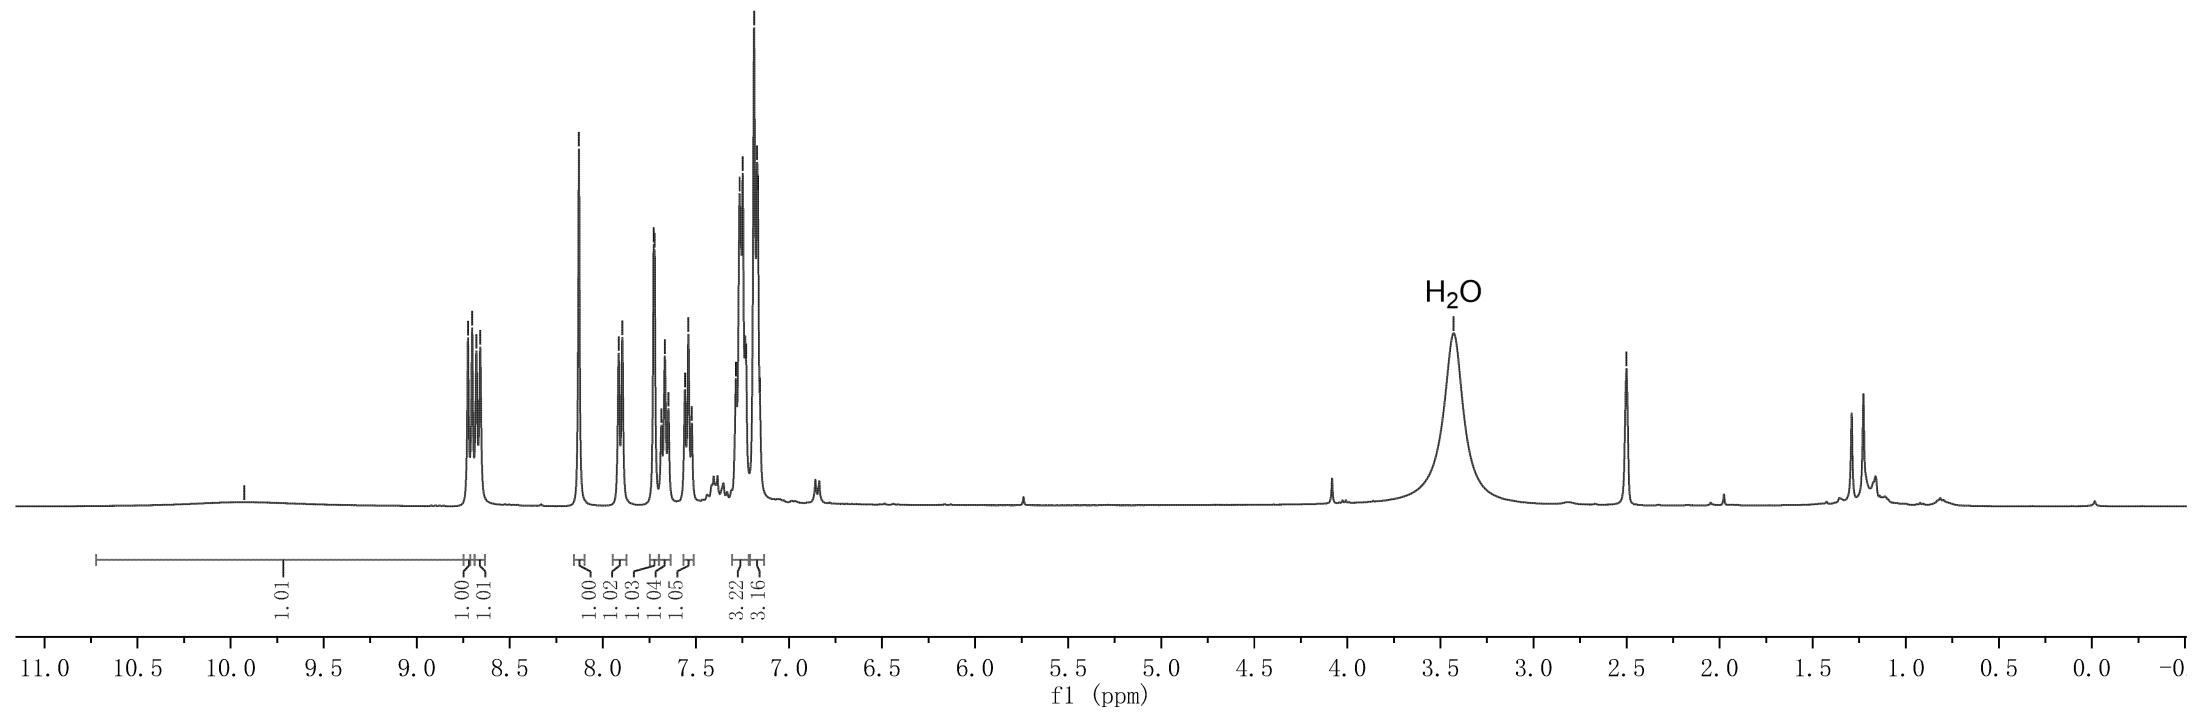

| Parameter                | Value               |
|--------------------------|---------------------|
| 1 Title                  | 2c-C-fxy-3-53-c     |
| 2 Origin                 | Bruker BioSpin GmbH |
| 3 Solvent                | DMSO                |
| 4 Temperature            | 300.0               |
| 5 Number of Scans        | 38                  |
| 6 Acquisition Time       | 1.3631              |
| 7 Acquisition Date       | 2021-05-17T15:57:01 |
| 8 Spectrometer Frequency | 100.61              |
| 9 Spectral Width         | 24038.5             |

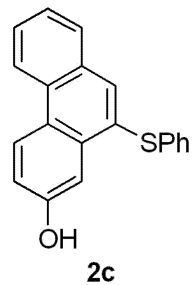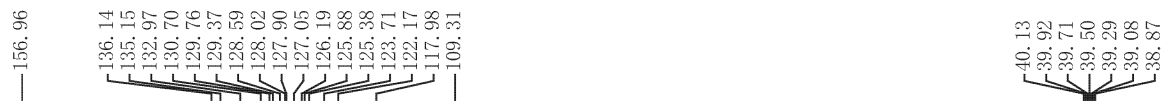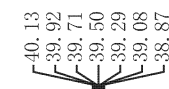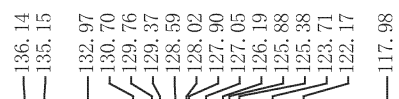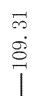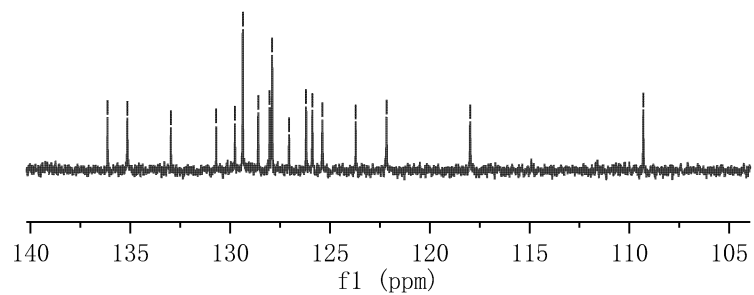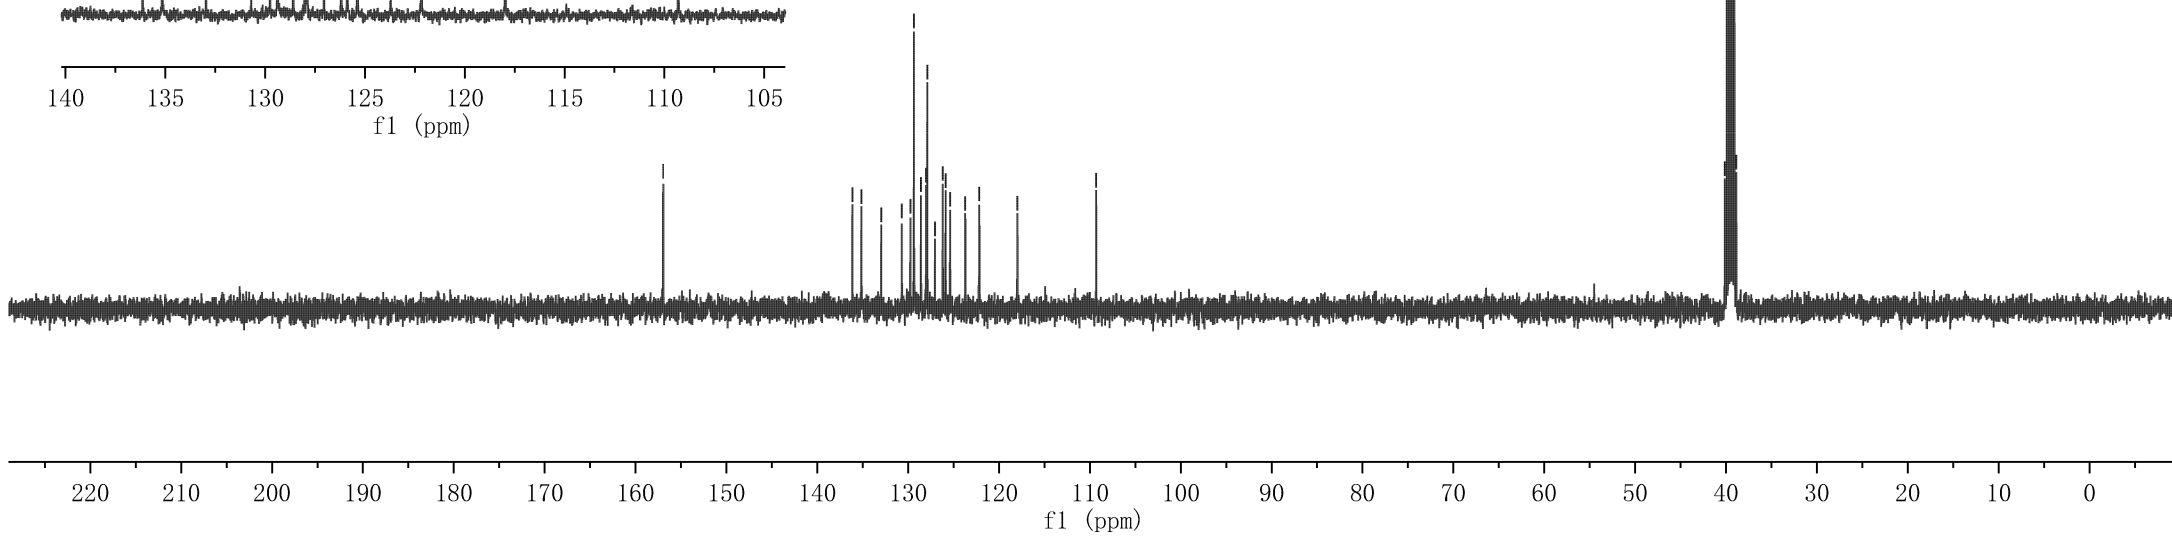

| Parameter                | Value               |
|--------------------------|---------------------|
| 1 Title                  | 2d-H-FXY-2-203      |
| 2 Origin                 | Bruker BioSpin GmbH |
| 3 Solvent                | DMSO                |
| 4 Temperature            | 298.0               |
| 5 Number of Scans        | 13                  |
| 6 Acquisition Time       | 4.0894              |
| 7 Acquisition Date       | 2020-07-14T14:29:46 |
| 8 Spectrometer Frequency | 400.13              |
| 9 Spectral Width         | 8012.8              |

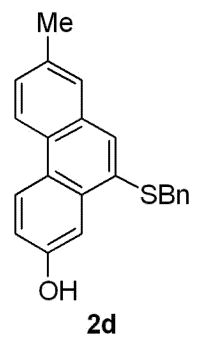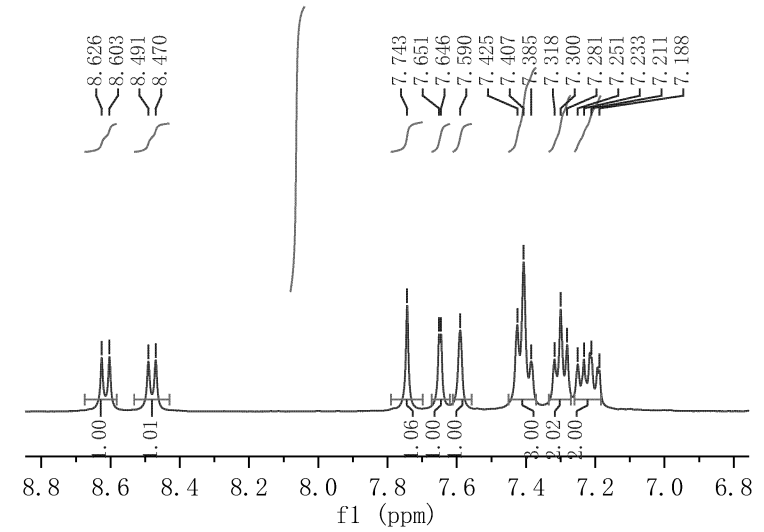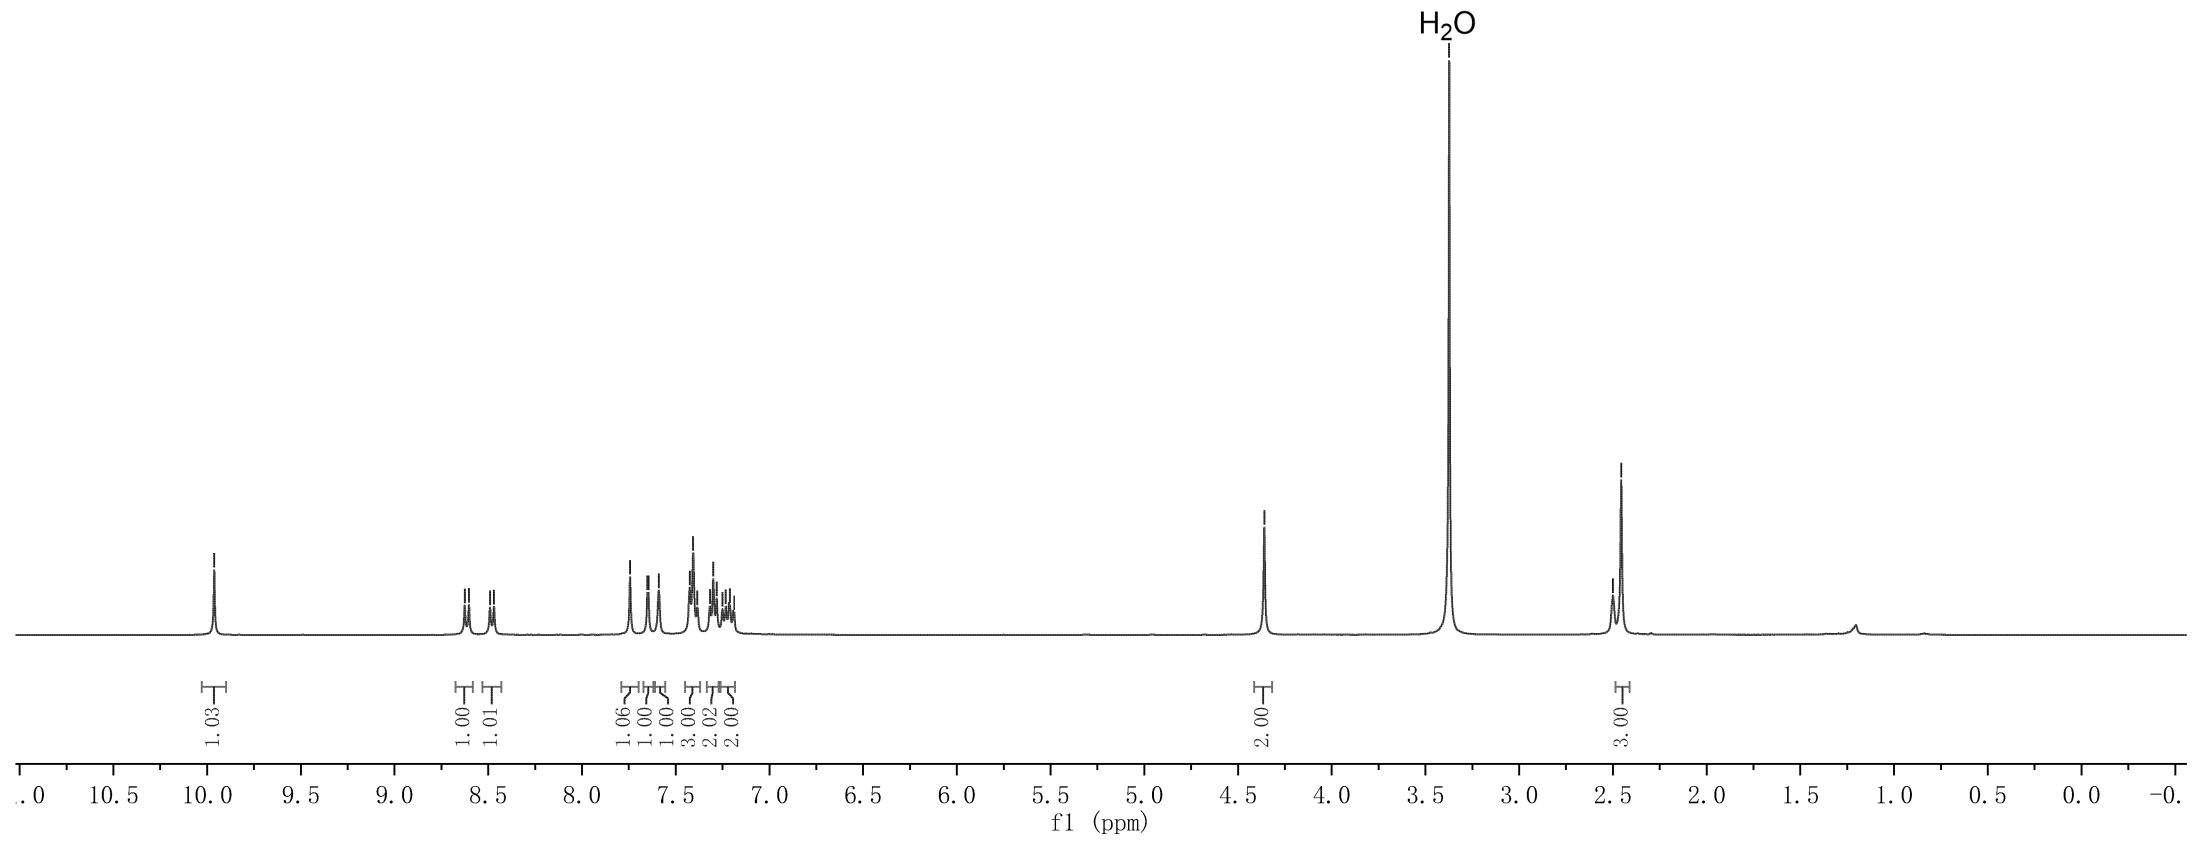

| Parameter                | Value               |
|--------------------------|---------------------|
| 1 Title                  | 2d-C-FXY-2-203-C    |
| 2 Origin                 | Bruker BioSpin GmbH |
| 3 Solvent                | DMSO                |
| 4 Temperature            | 300.0               |
| 5 Number of Scans        | 95                  |
| 6 Acquisition Time       | 1.3631              |
| 7 Acquisition Date       | 2020-07-14T14:35:00 |
| 8 Spectrometer Frequency | 100.61              |
| 9 Spectral Width         | 24038.5             |

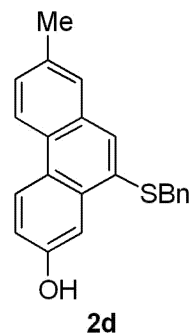

156.27  
 137.14  
 134.87  
 131.50  
 130.52  
 130.11  
 128.98  
 128.40  
 128.28  
 127.15  
 127.07  
 126.98  
 126.43  
 124.98  
 123.06  
 121.97  
 117.54  
 108.07  
 40.13  
 39.92  
 39.71  
 39.50  
 39.29  
 39.08  
 38.88  
 36.57  
 20.91

137.14  
 134.87  
 130.52  
 130.11  
 128.98  
 128.40  
 128.28  
 127.15  
 127.07  
 126.98  
 124.98  
 121.97  
 117.54  
 108.07

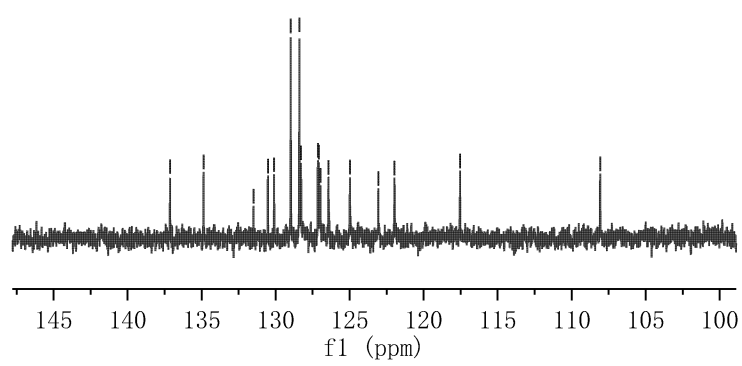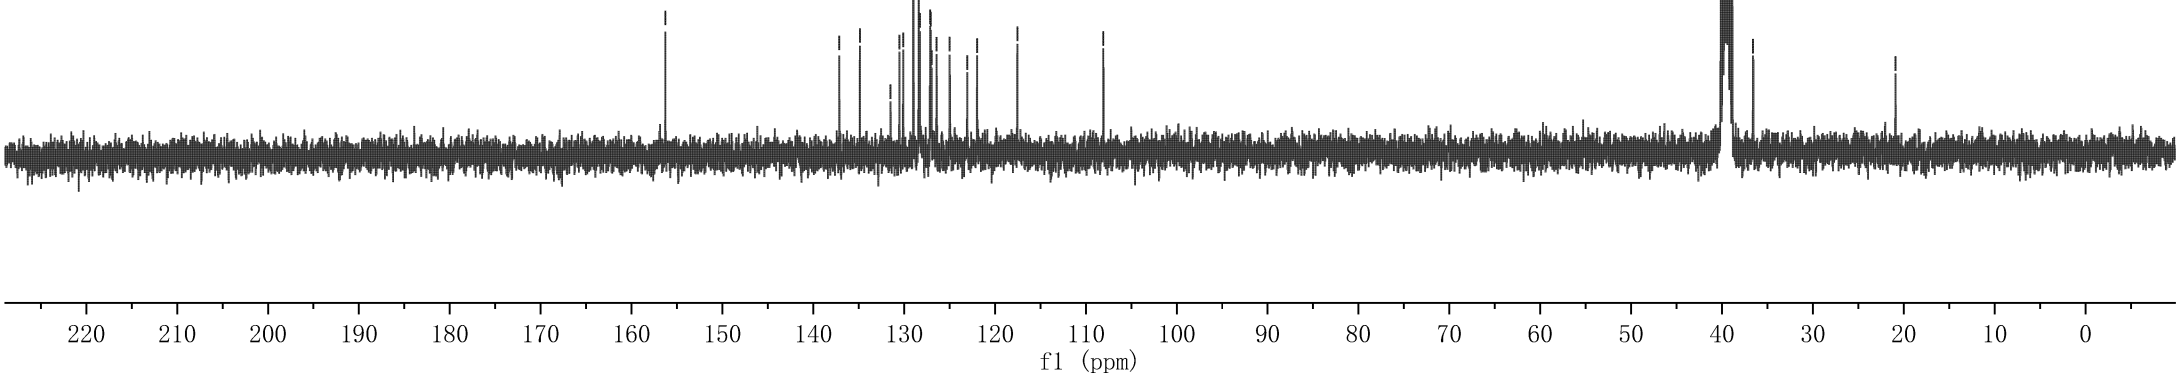



| Parameter                | Value               |
|--------------------------|---------------------|
| 1 Title                  | 2e-H                |
| 2 Origin                 |                     |
| 3 Solvent                | CDC13               |
| 4 Temperature            | 297.5               |
| 5 Number of Scans        | 16                  |
| 6 Acquisition Time       | 4.0002              |
| 7 Acquisition Date       | 2023-02-09T19:18:15 |
| 8 Spectrometer Frequency | 399.90              |
| 9 Spectral Width         | 8012.0              |

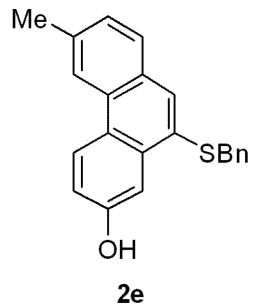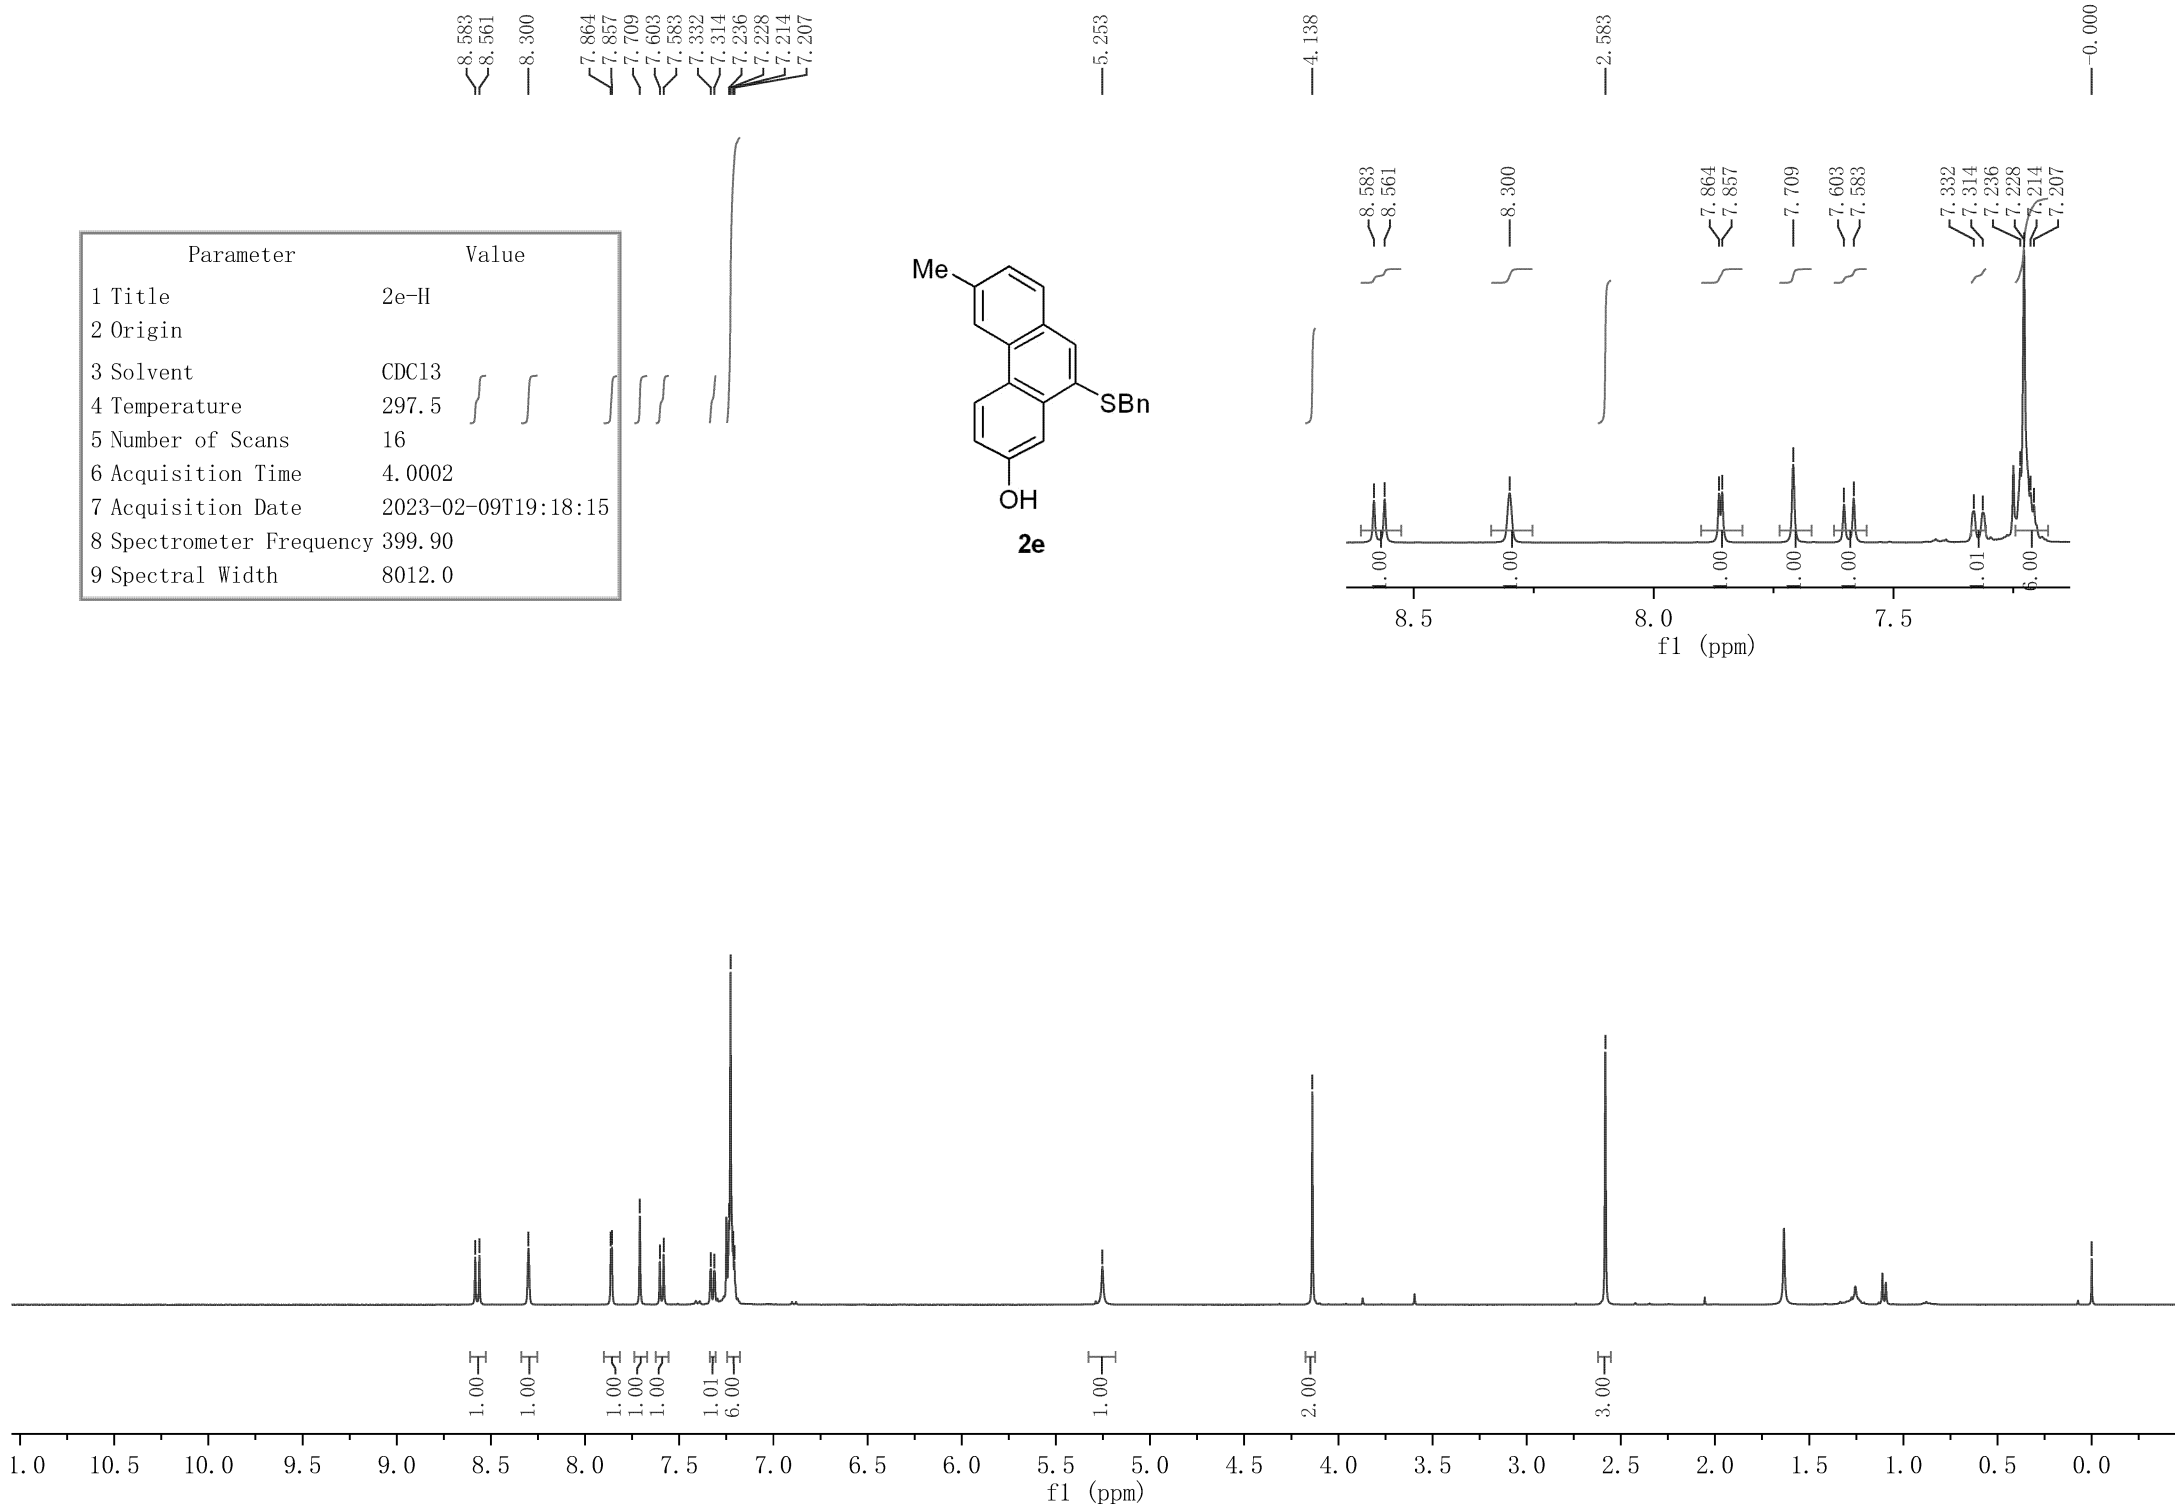

| Parameter                | Value               |
|--------------------------|---------------------|
| 1 Title                  | 2e-C                |
| 2 Origin                 |                     |
| 3 Solvent                | CDC13               |
| 4 Temperature            | 297.6               |
| 5 Number of Scans        | 800                 |
| 6 Acquisition Time       | 1.0000              |
| 7 Acquisition Date       | 2023-02-09T19:47:44 |
| 8 Spectrometer Frequency | 100.56              |
| 9 Spectral Width         | 26041.0             |

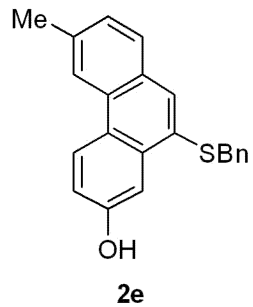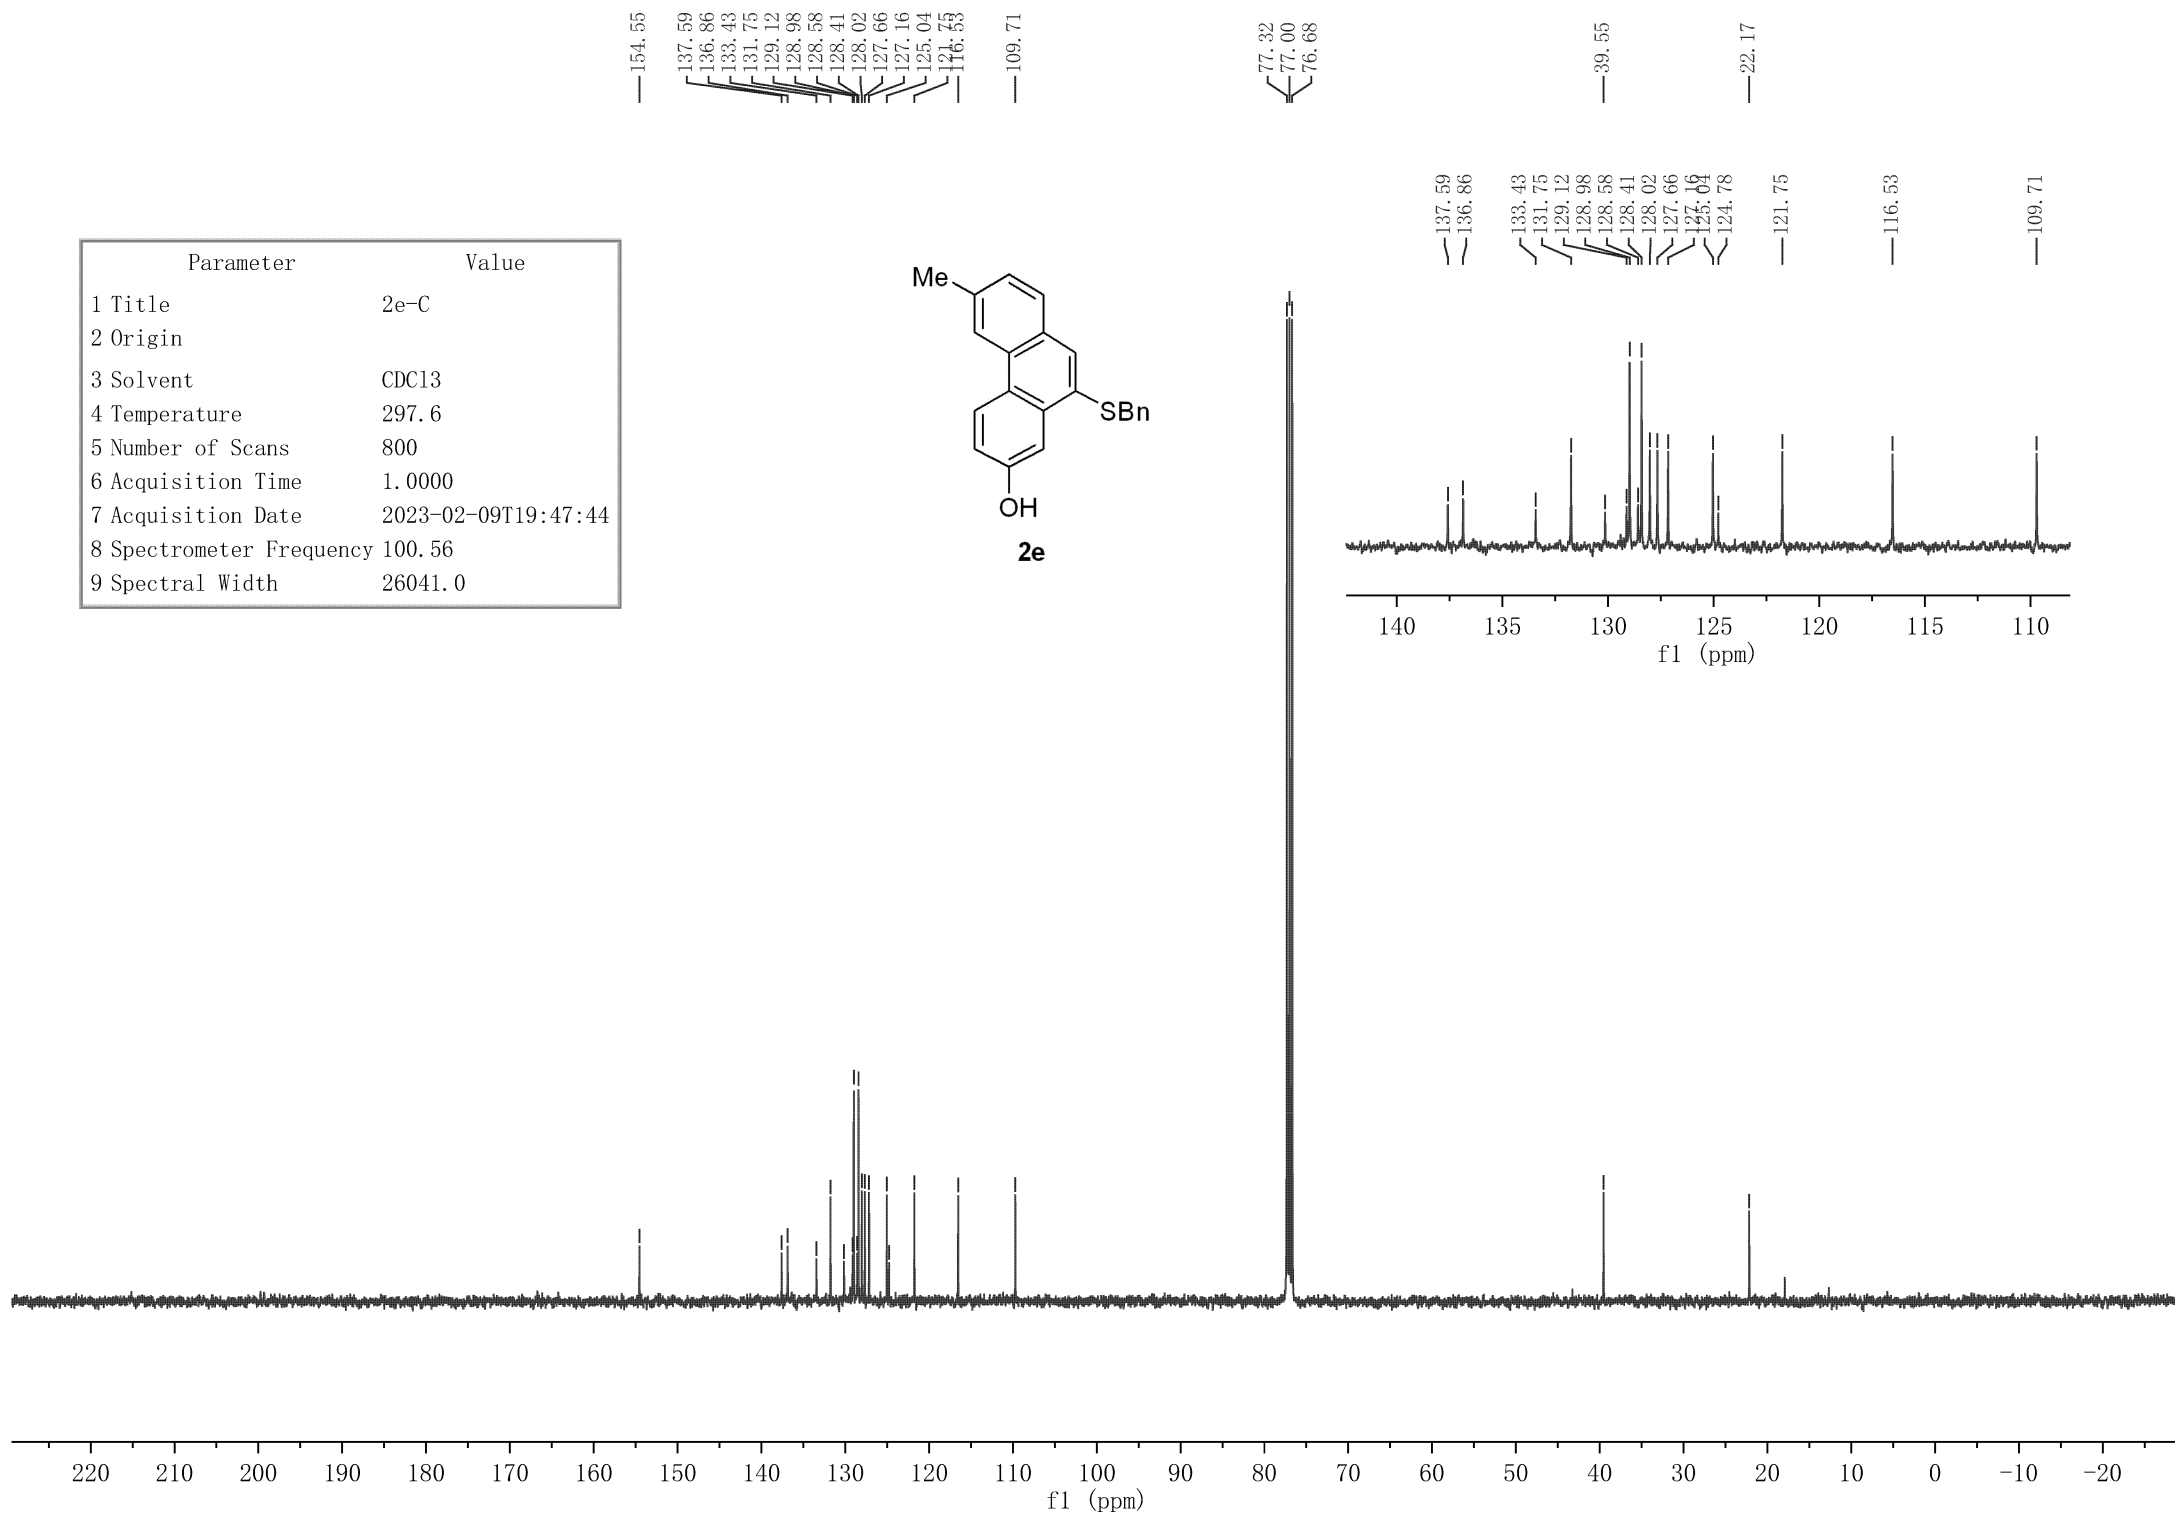

| Parameter                | Value               |
|--------------------------|---------------------|
| 1 Title                  | 2f-H                |
| 2 Origin                 |                     |
| 3 Solvent                | CDC13               |
| 4 Temperature            | 297.5               |
| 5 Number of Scans        | 16                  |
| 6 Acquisition Time       | 4.0002              |
| 7 Acquisition Date       | 2023-02-09T18:43:49 |
| 8 Spectrometer Frequency | 399.90              |
| 9 Spectral Width         | 8012.0              |

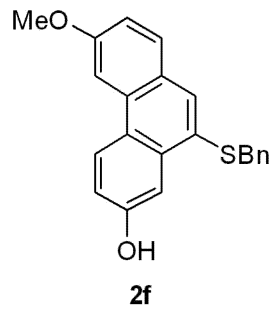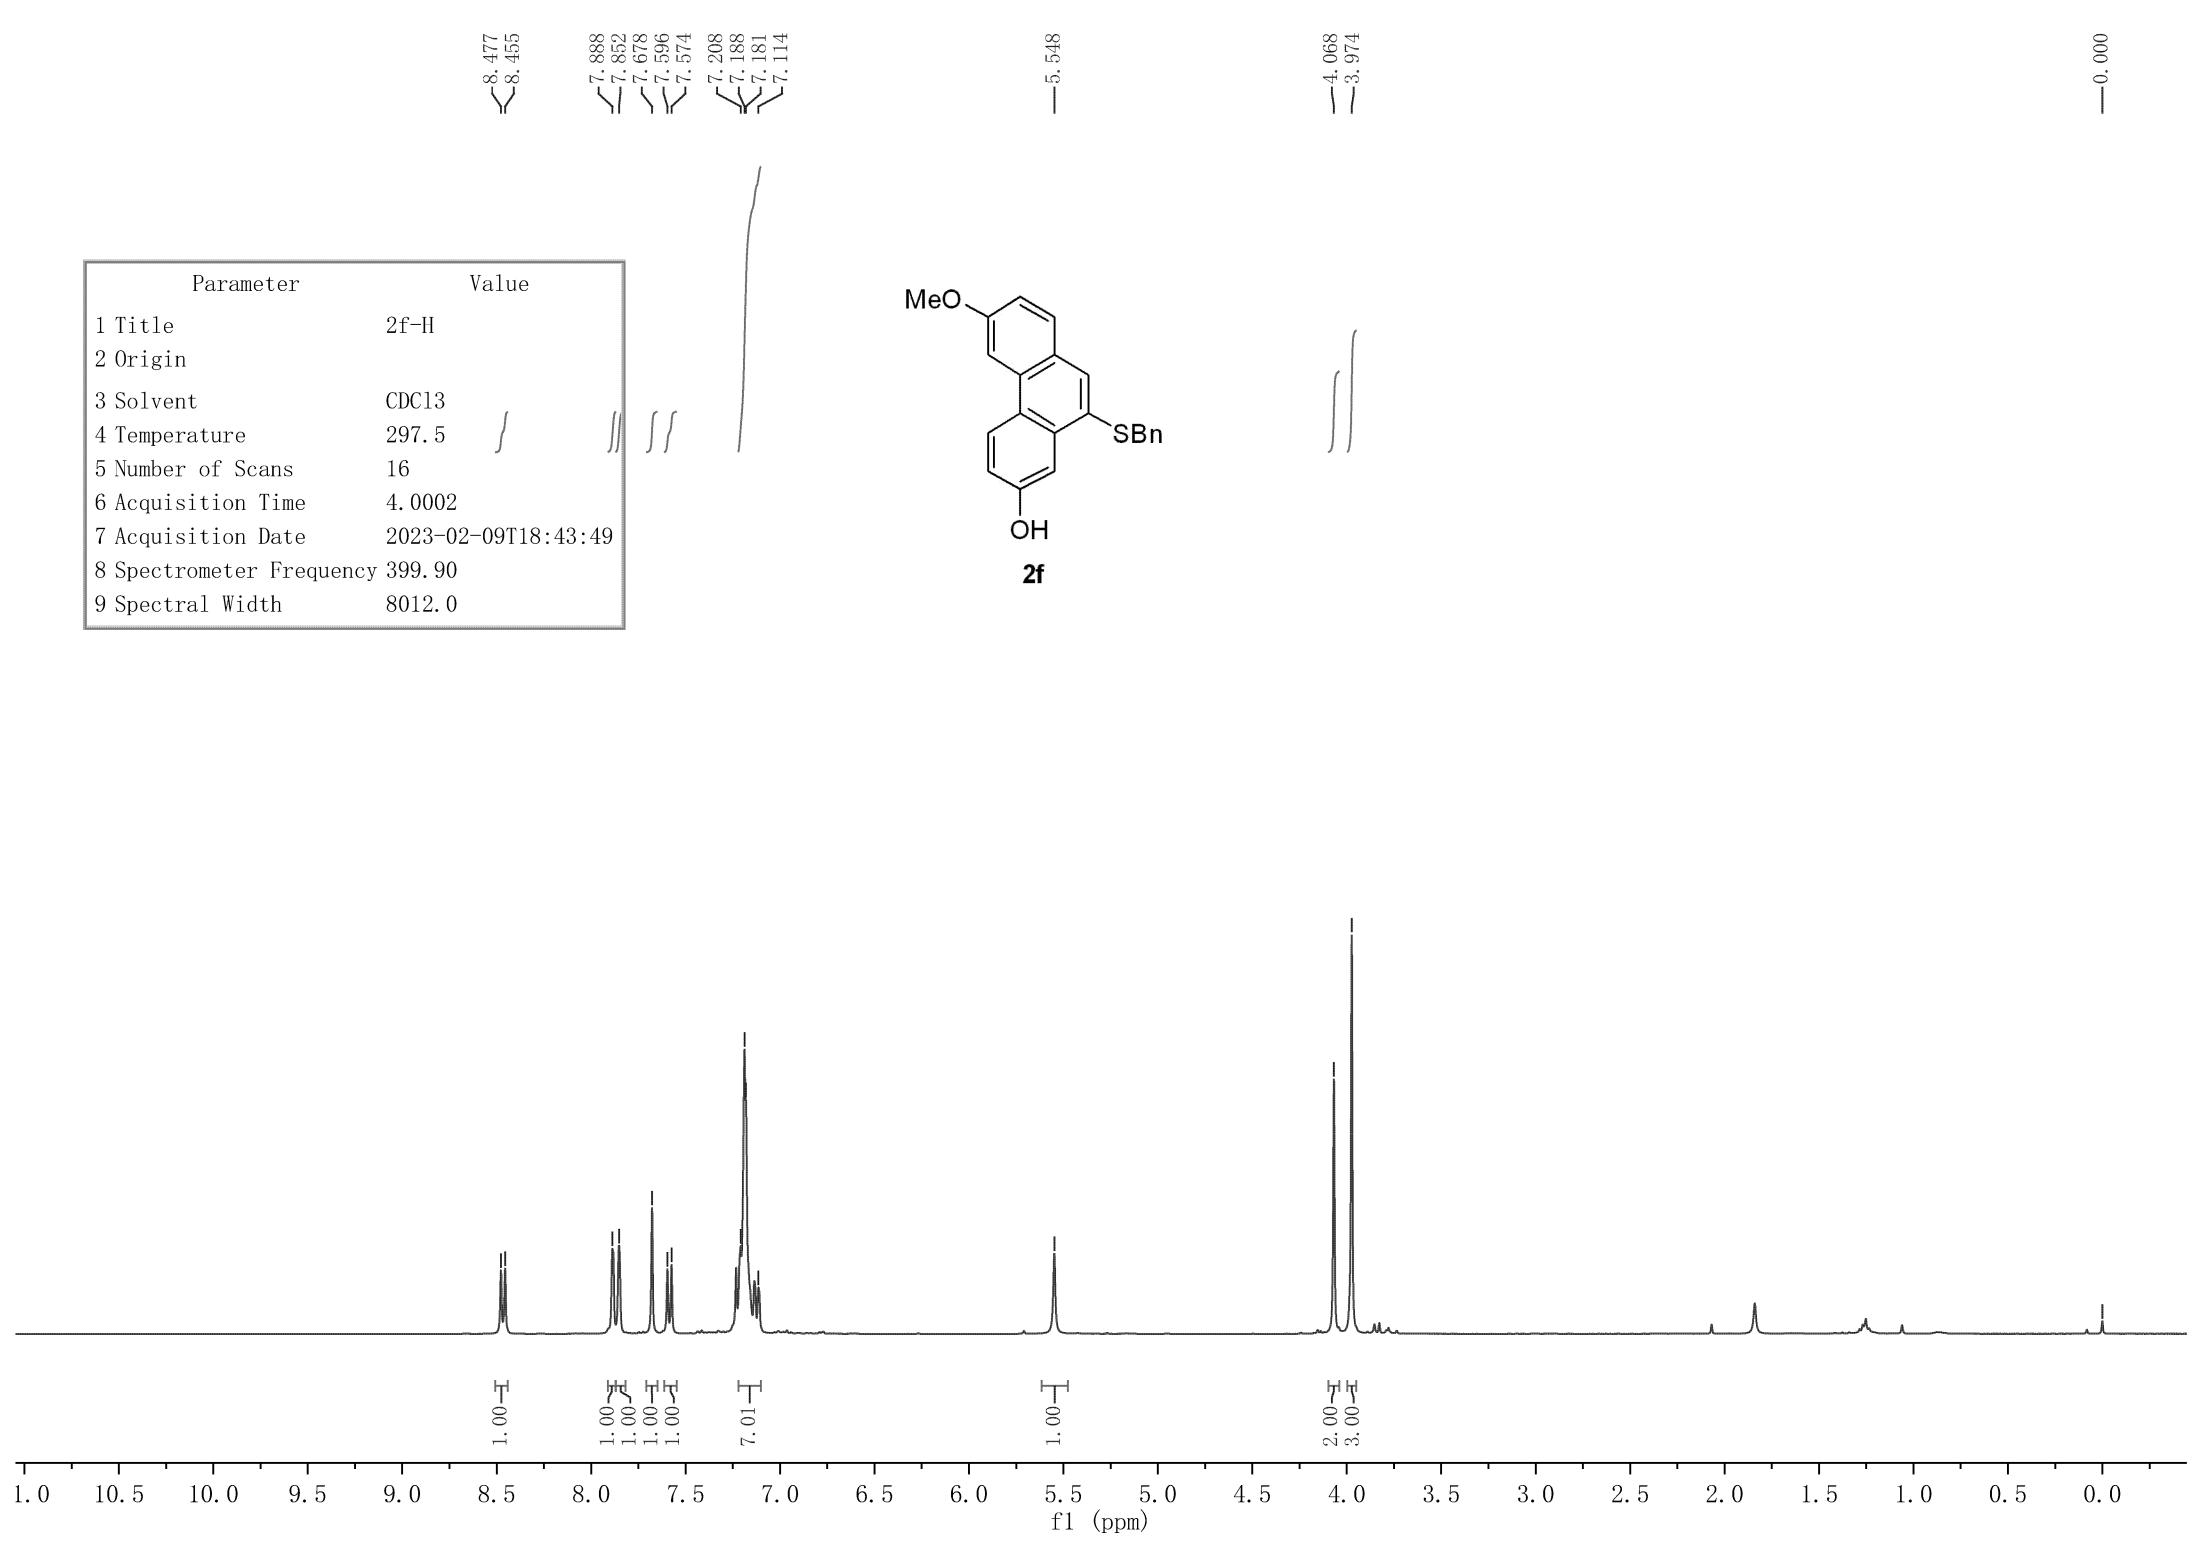

| Parameter                | Value               |
|--------------------------|---------------------|
| 1 Title                  | 2f-C                |
| 2 Origin                 |                     |
| 3 Solvent                | CDC13               |
| 4 Temperature            | 297.5               |
| 5 Number of Scans        | 800                 |
| 6 Acquisition Time       | 1.0000              |
| 7 Acquisition Date       | 2023-02-09T19:13:05 |
| 8 Spectrometer Frequency | 100.56              |
| 9 Spectral Width         | 26041.0             |

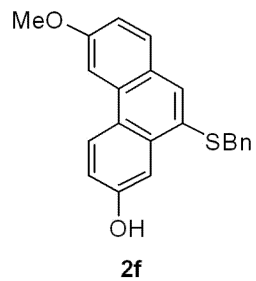

158.81  
154.75  
137.72  
133.83  
132.56  
131.62  
129.74  
128.95  
128.35  
127.12  
127.07  
125.35  
125.10  
124.54  
116.36  
115.97  
109.84  
103.39

77.32  
77.00  
76.68

55.44

39.80

137.72  
133.83  
132.56  
131.62  
129.74  
128.95  
128.35  
127.12  
127.07  
125.35  
125.10  
124.54  
116.36  
115.97  
109.84  
103.39

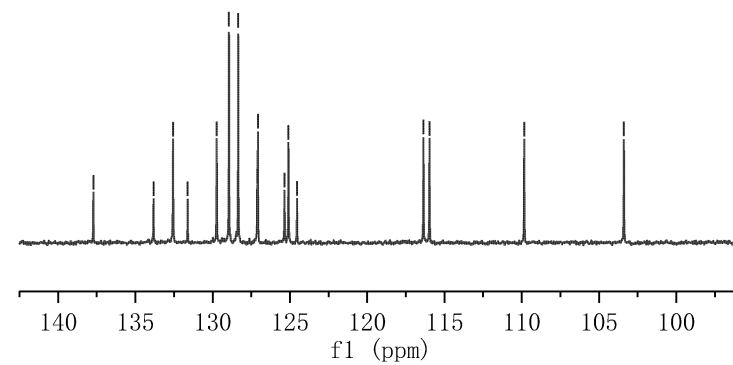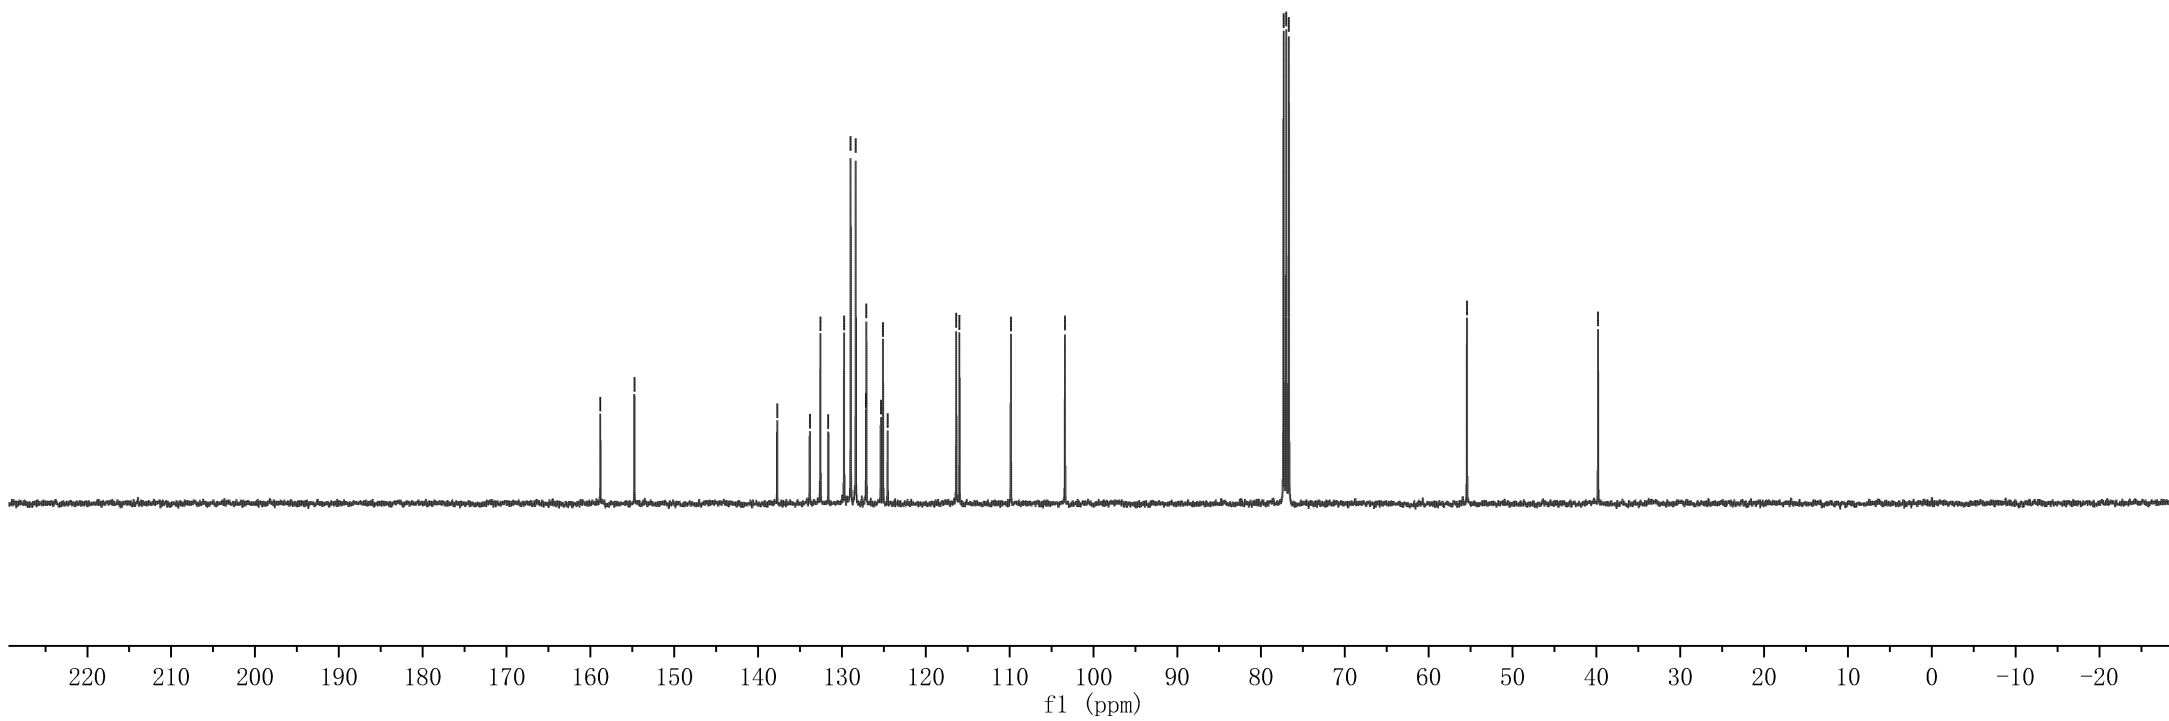

| Parameter                | Value               |
|--------------------------|---------------------|
| 1 Title                  | 2g-H-FXY-3-27-HH    |
| 2 Origin                 | Bruker BioSpin GmbH |
| 3 Solvent                | DMSO                |
| 4 Temperature            | 298.0               |
| 5 Number of Scans        | 9                   |
| 6 Acquisition Time       | 4.0894              |
| 7 Acquisition Date       | 2020-08-05T14:34:29 |
| 8 Spectrometer Frequency | 400.13              |
| 9 Spectral Width         | 8012.8              |

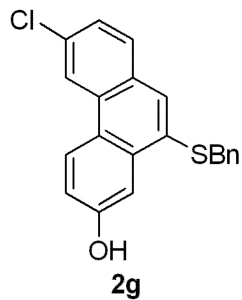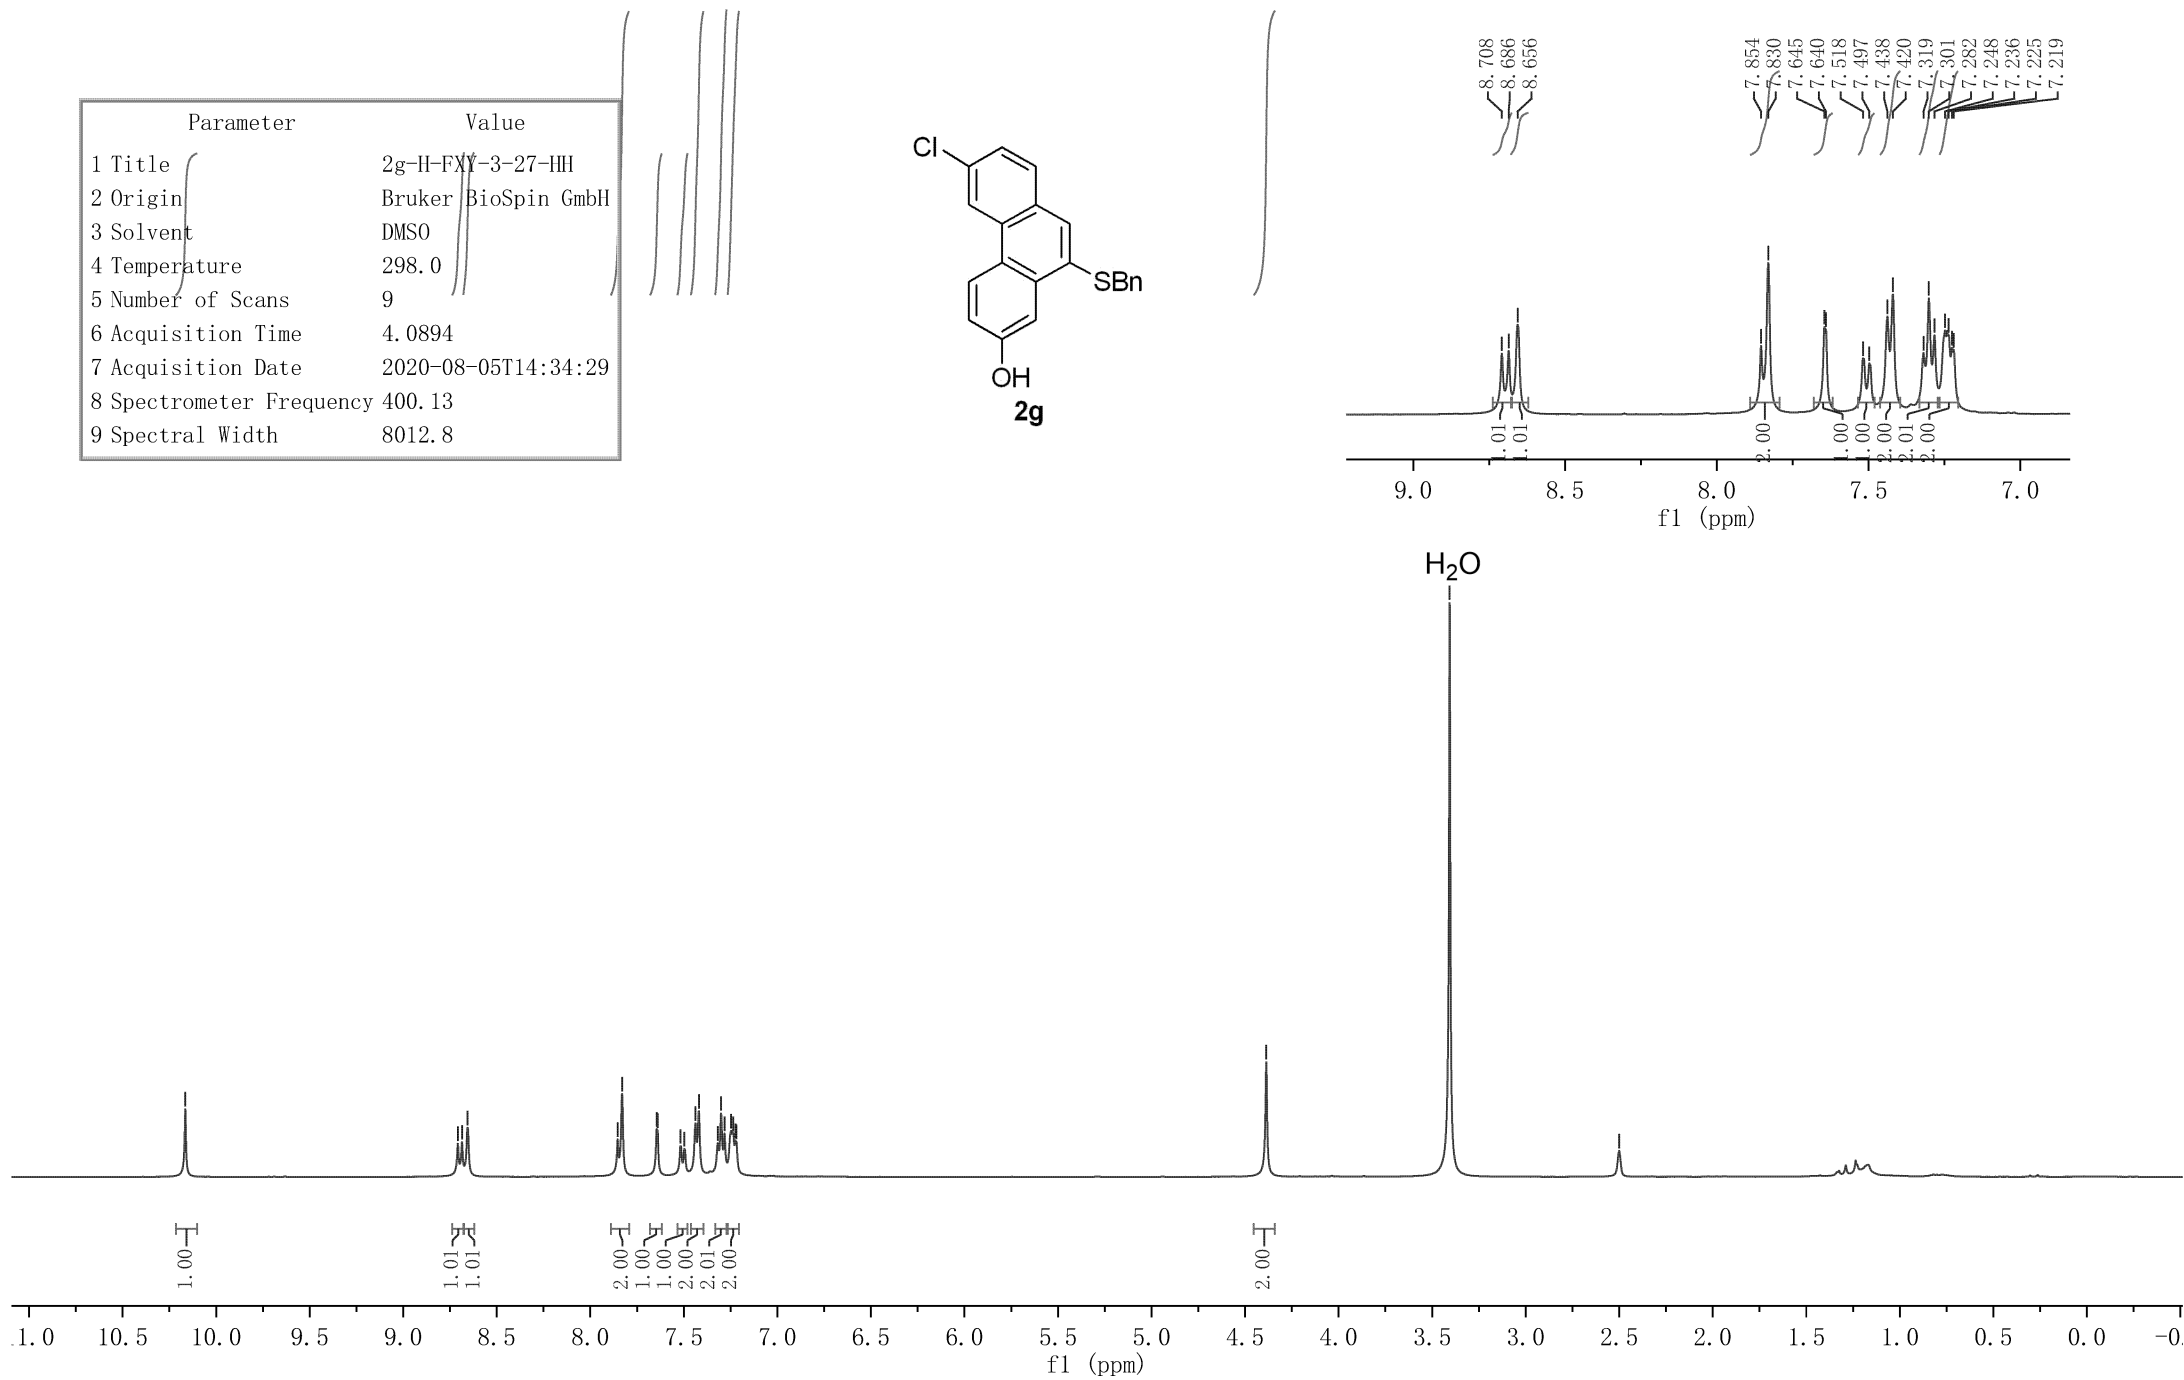

| Parameter                | Value               |
|--------------------------|---------------------|
| 1 Title                  | 2g-C-FXY-3-27-C     |
| 2 Origin                 | Bruker BioSpin GmbH |
| 3 Solvent                | DMSO                |
| 4 Temperature            | 300.0               |
| 5 Number of Scans        | 47                  |
| 6 Acquisition Time       | 1.3631              |
| 7 Acquisition Date       | 2020-08-05T14:36:08 |
| 8 Spectrometer Frequency | 100.61              |
| 9 Spectral Width         | 24038.5             |

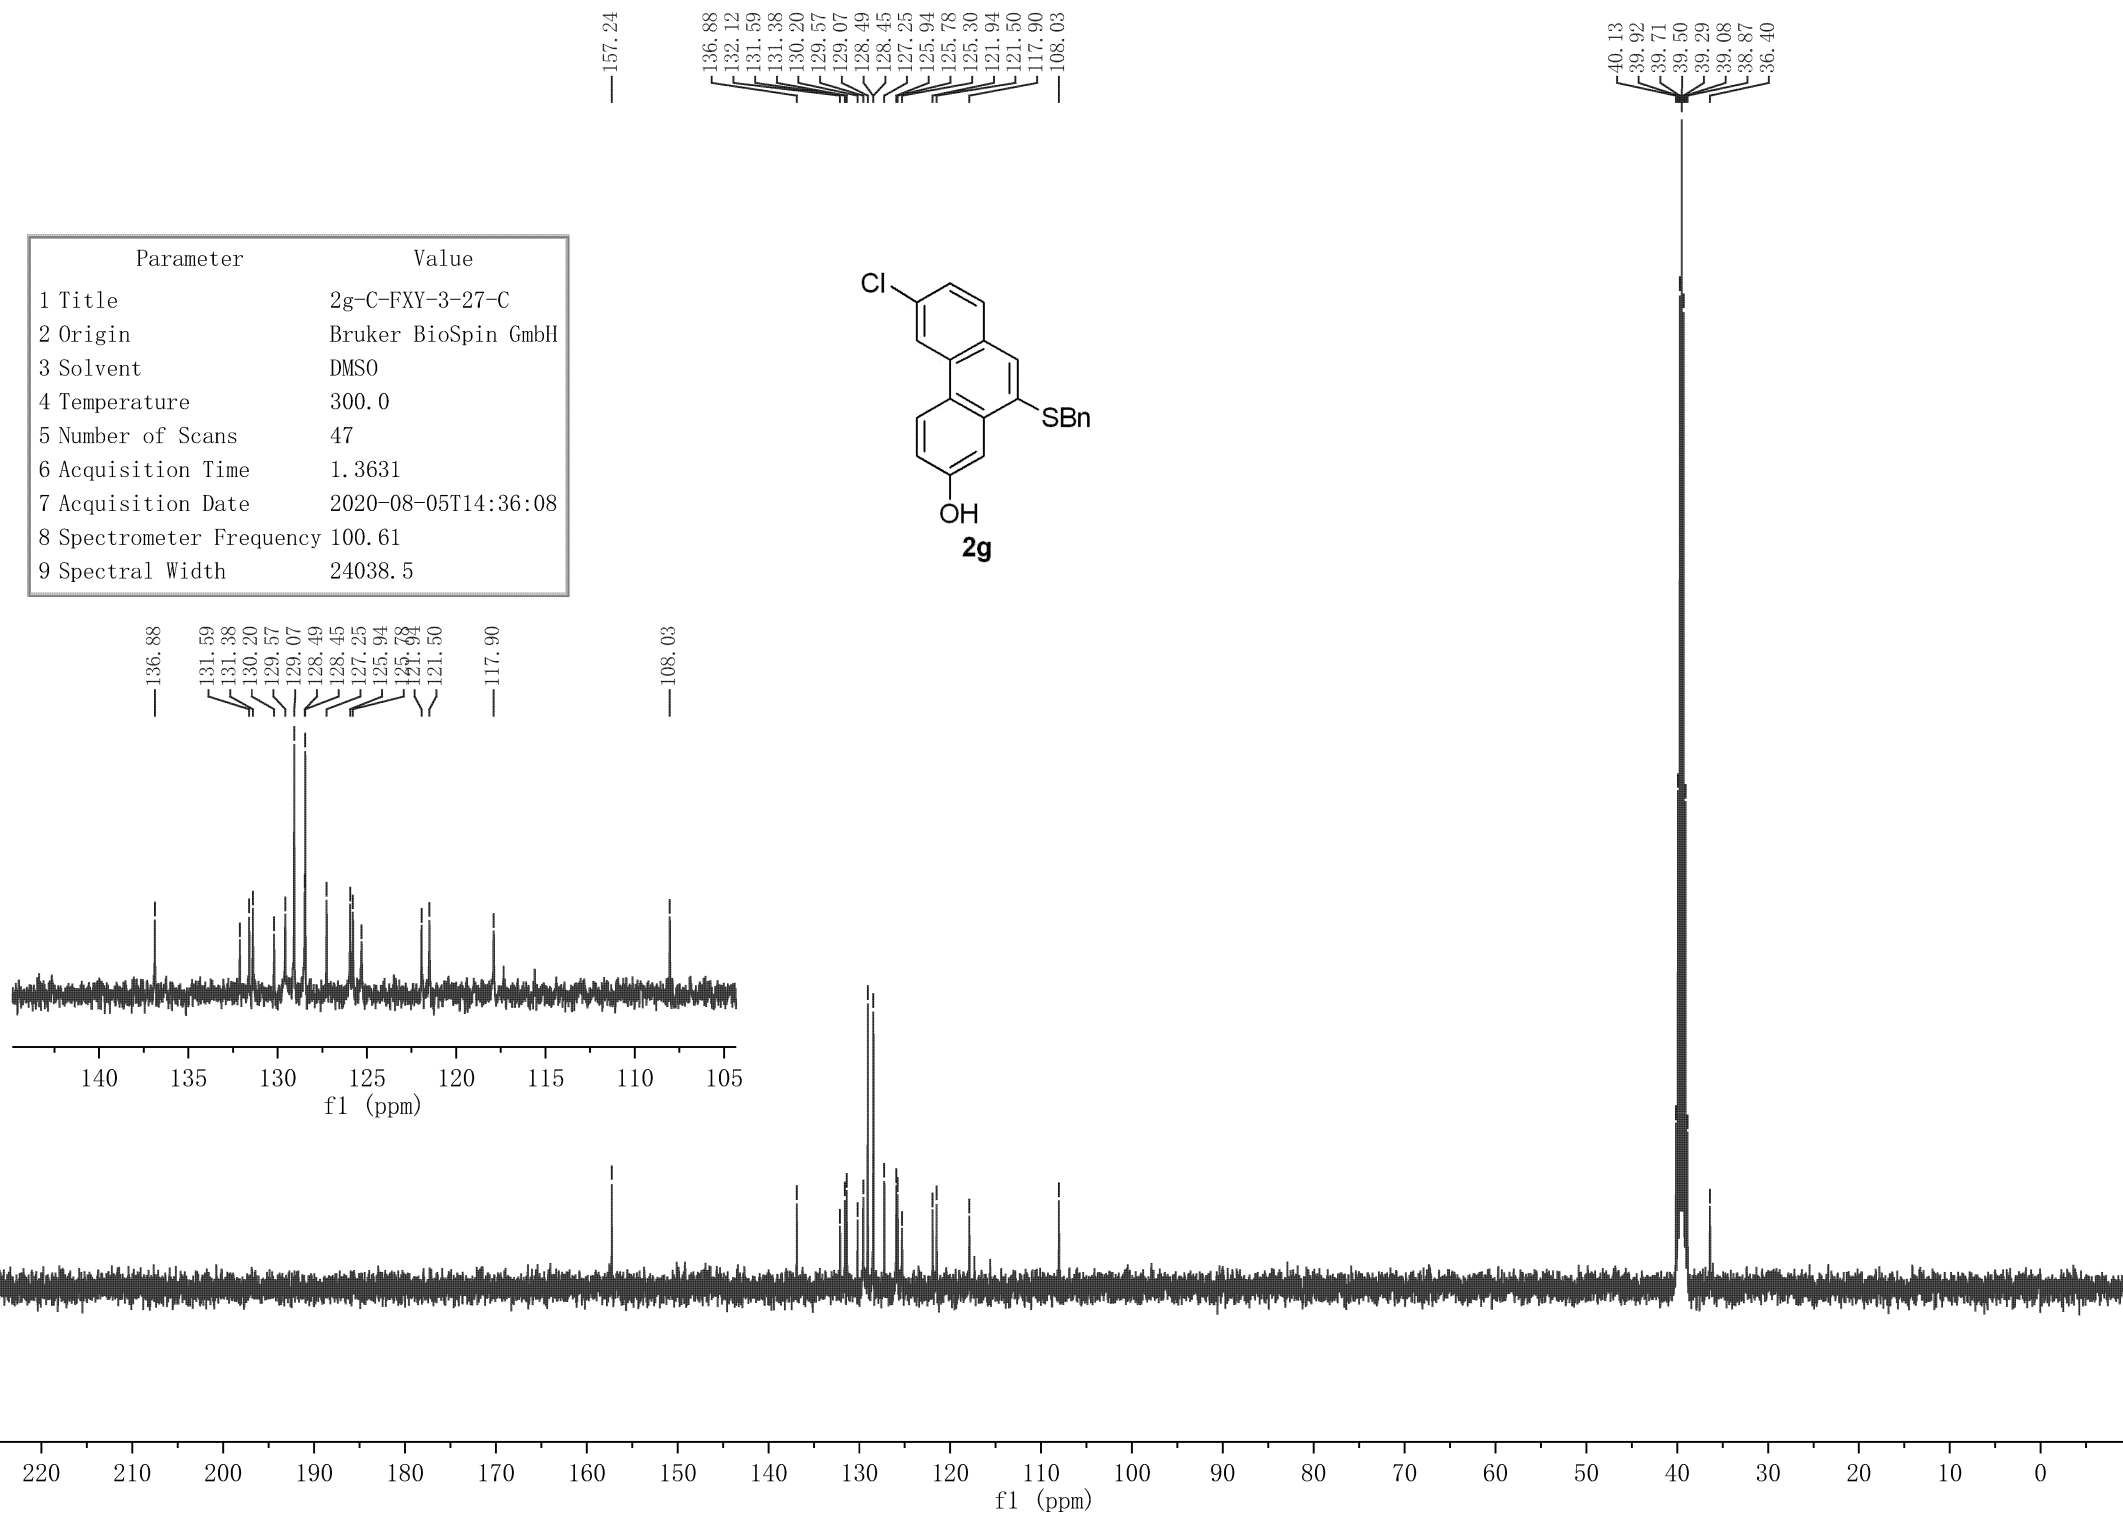

| Parameter                | Value               |
|--------------------------|---------------------|
| 1 Title                  | 2h-H                |
| 2 Origin                 |                     |
| 3 Solvent                | CDC13               |
| 4 Temperature            | 297.8               |
| 5 Number of Scans        | 16                  |
| 6 Acquisition Time       | 4.0002              |
| 7 Acquisition Date       | 2023-02-10T15:14:28 |
| 8 Spectrometer Frequency | 399.90              |
| 9 Spectral Width         | 8012.0              |

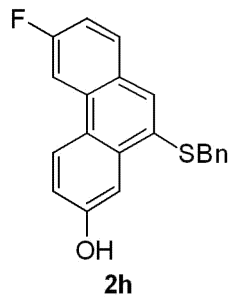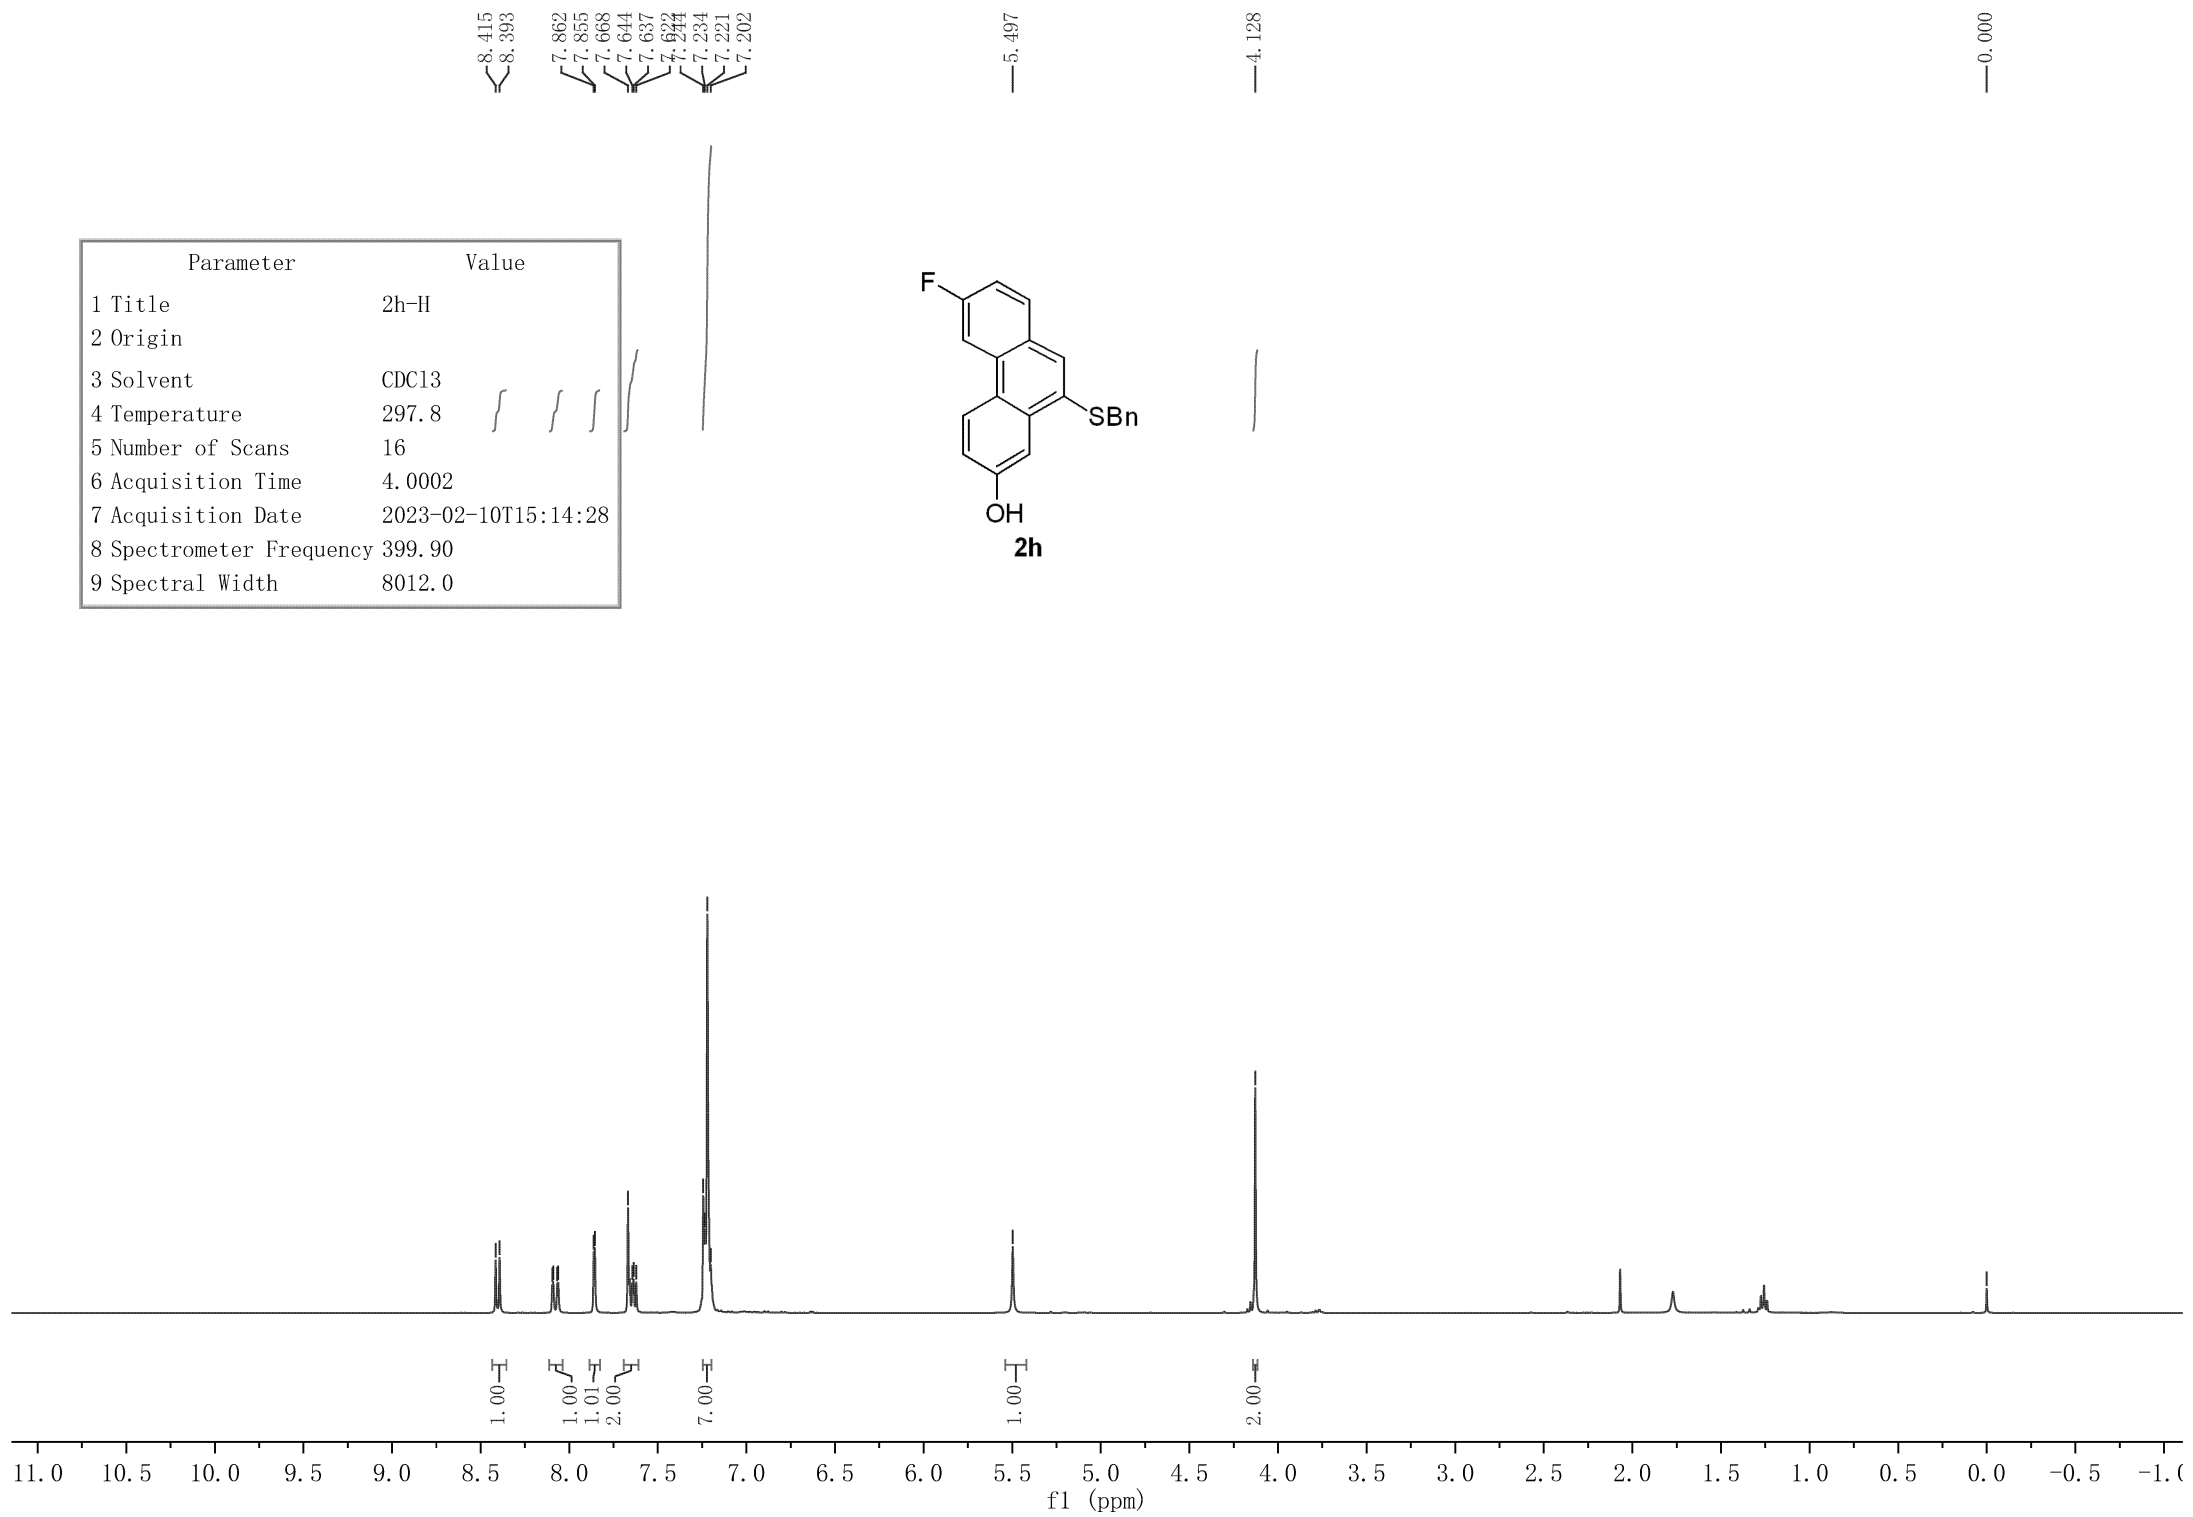

| Parameter                | Value               |
|--------------------------|---------------------|
| 1 Title                  | 2h-C                |
| 2 Origin                 |                     |
| 3 Solvent                | CDC13               |
| 4 Temperature            | 297.8               |
| 5 Number of Scans        | 500                 |
| 6 Acquisition Time       | 1.0000              |
| 7 Acquisition Date       | 2023-02-10T15:33:43 |
| 8 Spectrometer Frequency | 100.56              |
| 9 Spectral Width         | 26041.0             |

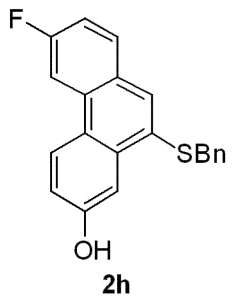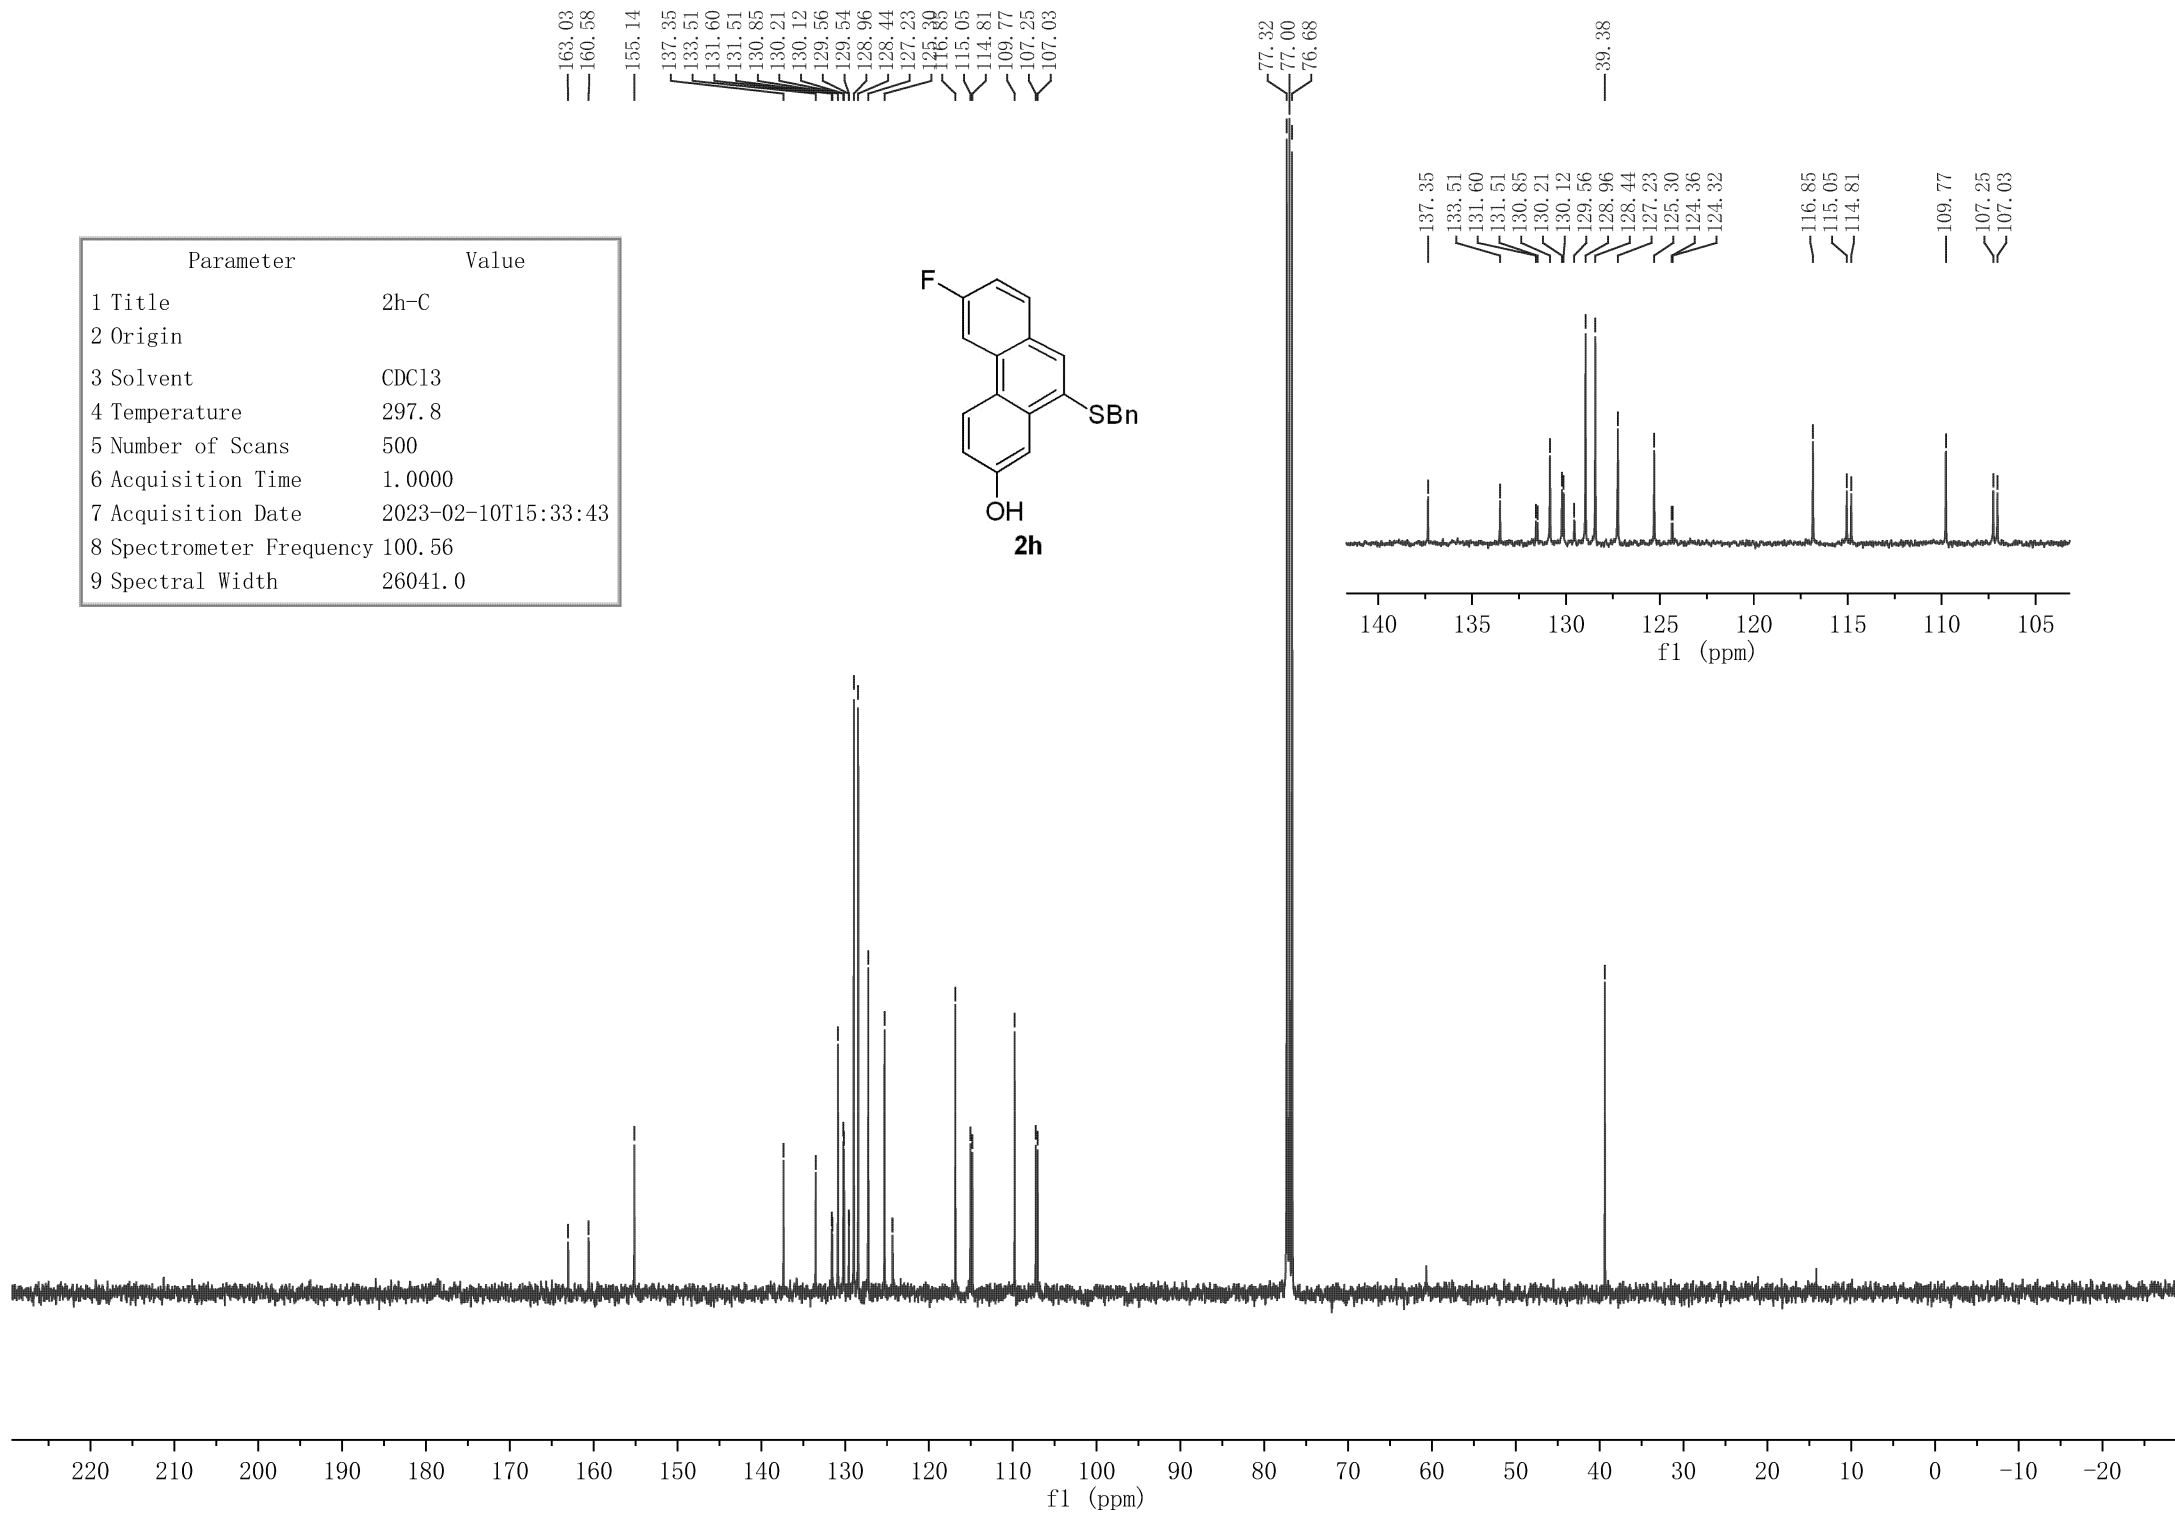



| Parameter                | Value               |
|--------------------------|---------------------|
| 1 Title                  | 2h-F                |
| 2 Origin                 |                     |
| 3 Solvent                | CDC13               |
| 4 Temperature            | 297.8               |
| 5 Number of Scans        | 16                  |
| 6 Acquisition Time       | 1.0000              |
| 7 Acquisition Date       | 2023-02-10T15:36:58 |
| 8 Spectrometer Frequency | 376.28              |
| 9 Spectral Width         | 96153.0             |

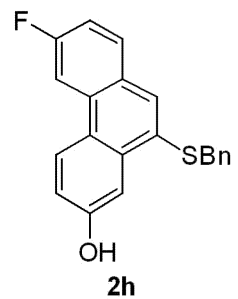

—112.63

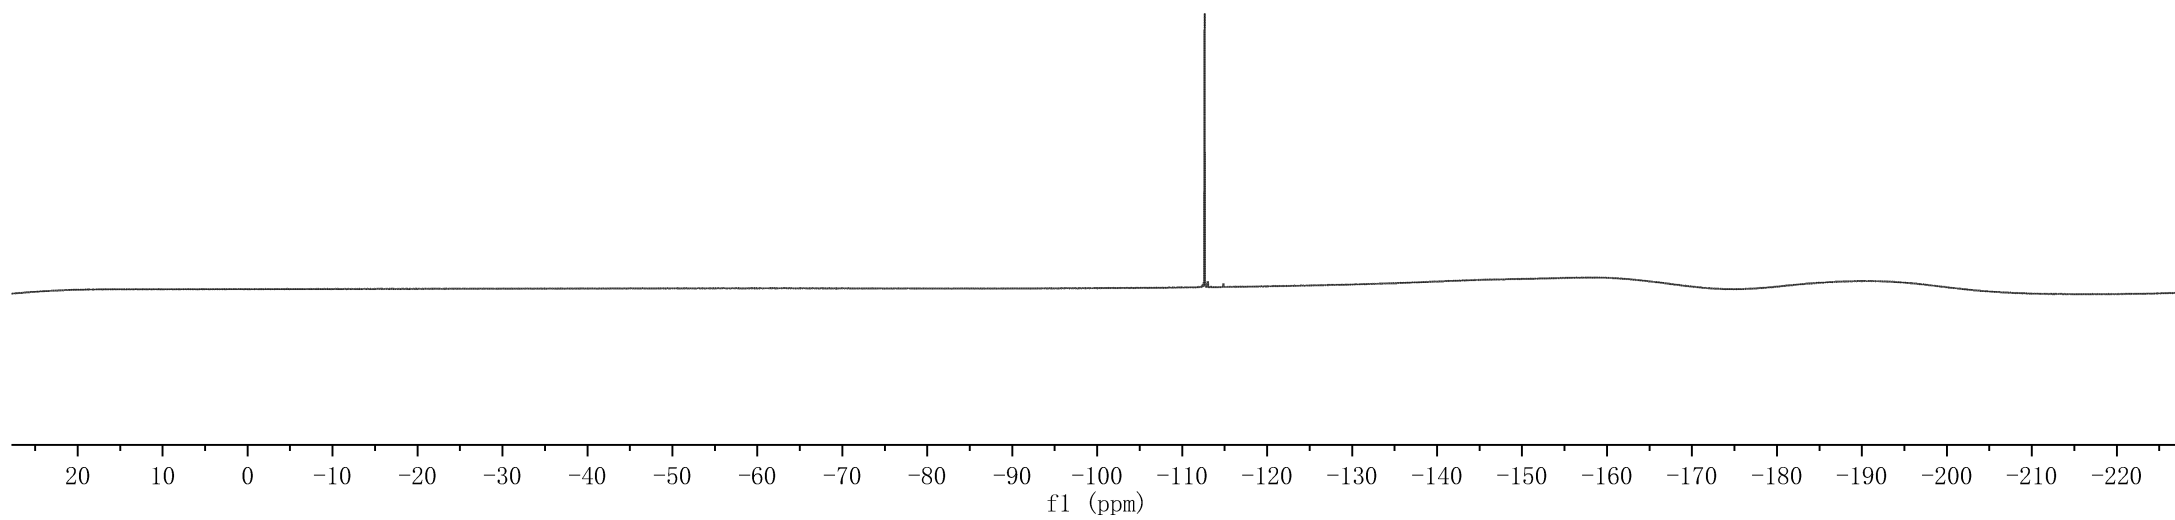

| Parameter                | Value               |
|--------------------------|---------------------|
| 1 Title                  | 2i-H-fxy-3-97       |
| 2 Origin                 | Bruker BioSpin GmbH |
| 3 Solvent                | DMSO                |
| 4 Temperature            | 298.0               |
| 5 Number of Scans        | 12                  |
| 6 Acquisition Time       | 4.0894              |
| 7 Acquisition Date       | 2021-05-17T16:08:36 |
| 8 Spectrometer Frequency | 400.13              |
| 9 Spectral Width         | 8012.8              |

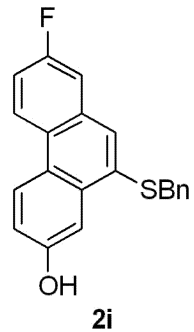

2i

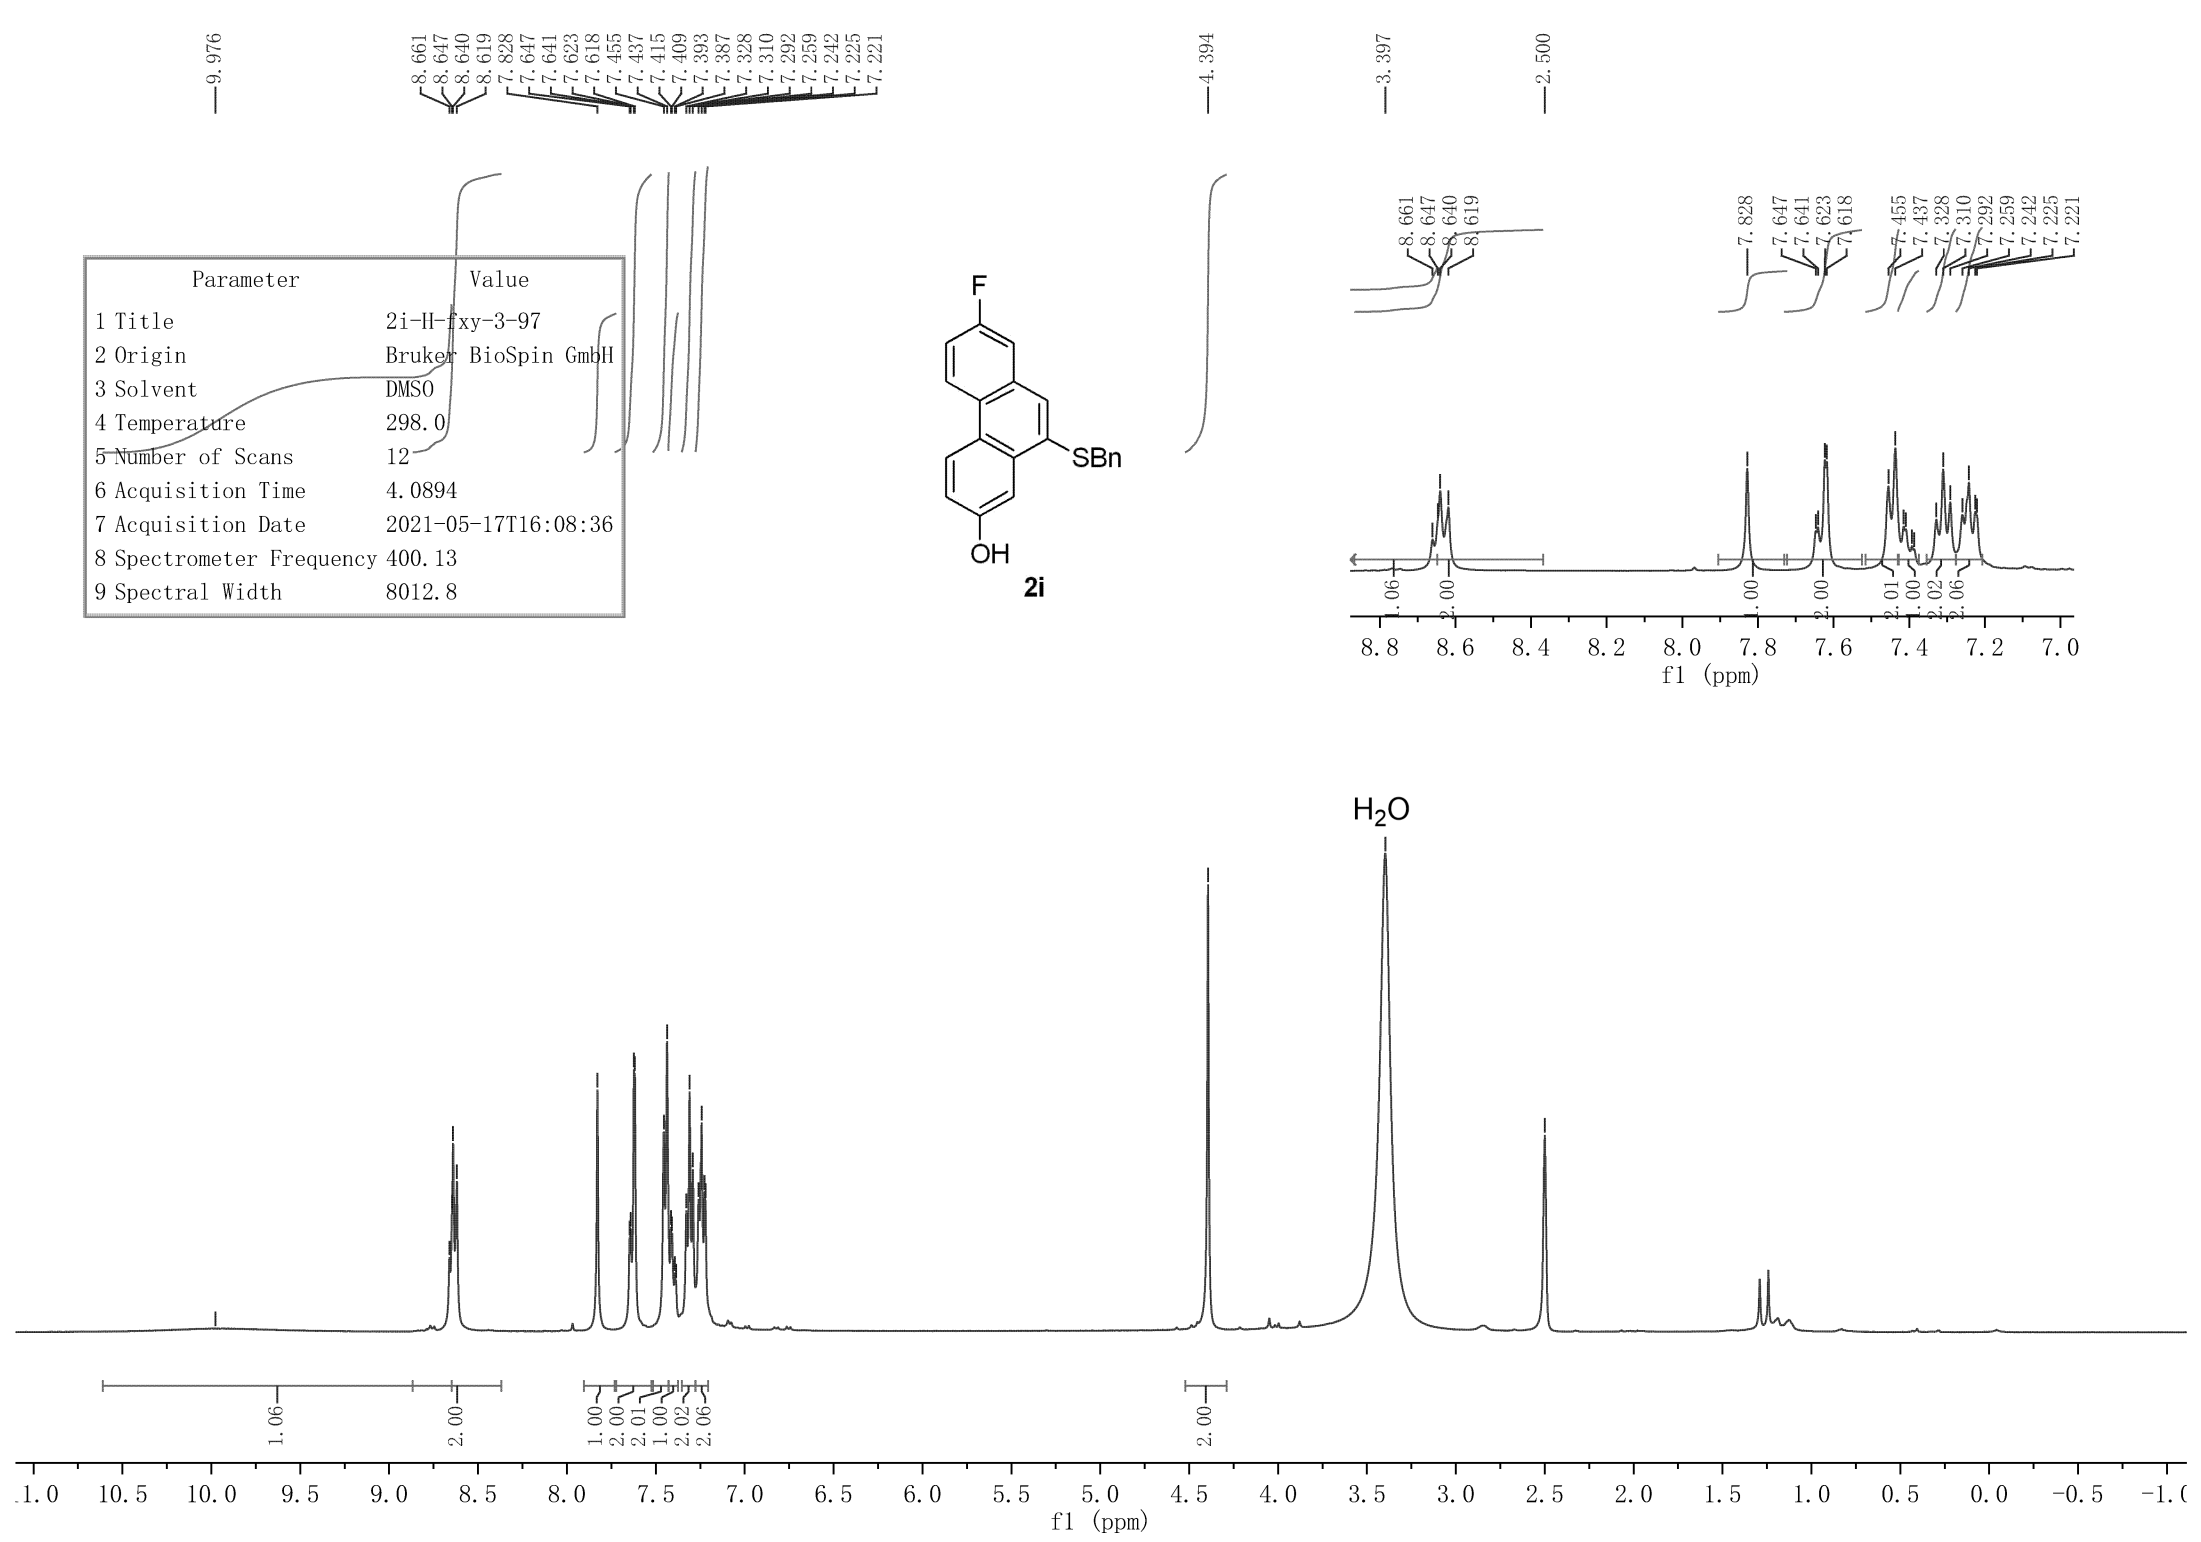

| Parameter                | Value               |
|--------------------------|---------------------|
| 1 Title                  | 2i-C-fxy-3-97-c     |
| 2 Origin                 | Bruker BioSpin GmbH |
| 3 Solvent                | DMSO                |
| 4 Temperature            | 300.0               |
| 5 Number of Scans        | 141                 |
| 6 Acquisition Time       | 1.3631              |
| 7 Acquisition Date       | 2021-05-17T16:10:30 |
| 8 Spectrometer Frequency | 100.61              |
| 9 Spectral Width         | 24038.5             |

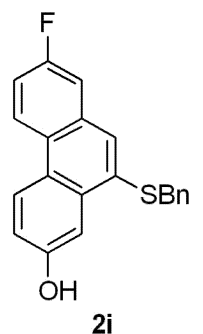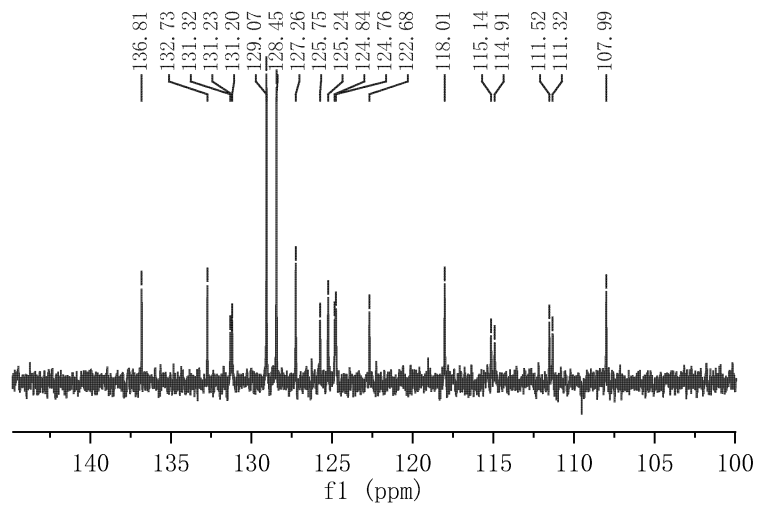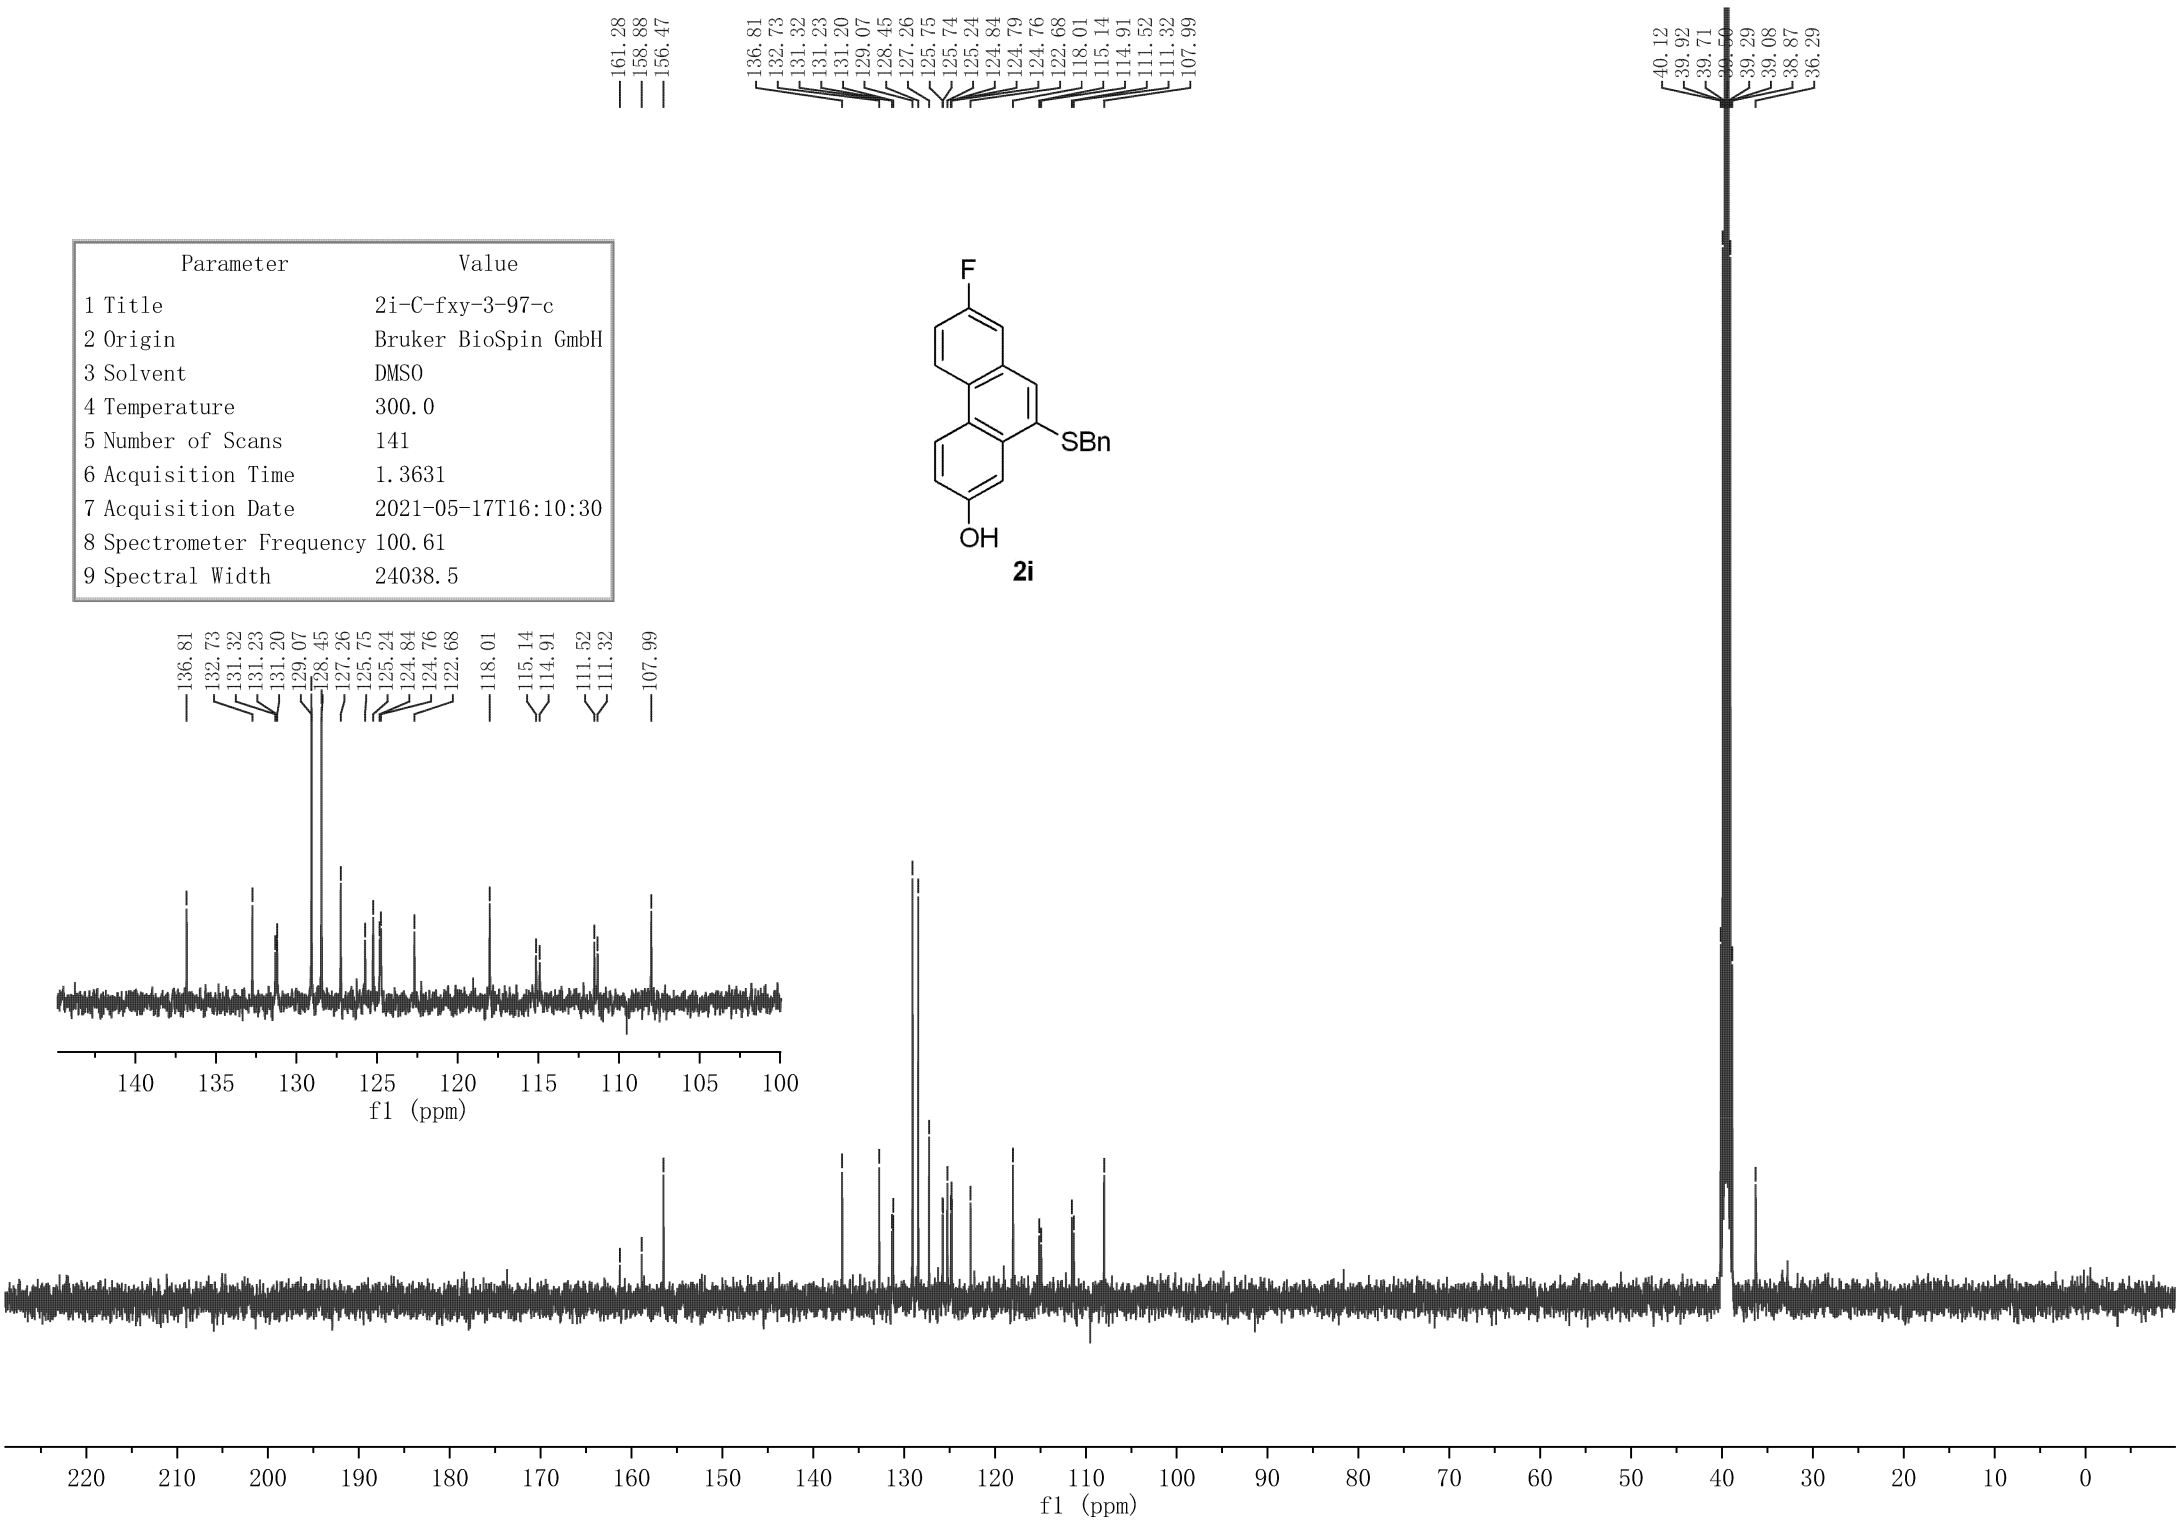

| Parameter                | Value               |
|--------------------------|---------------------|
| 1 Title                  | fxi-2i-f-nmr        |
| 2 Origin                 |                     |
| 3 Solvent                | CDC13               |
| 4 Temperature            | 296.3               |
| 5 Number of Scans        | 16                  |
| 6 Acquisition Time       | 1.0000              |
| 7 Acquisition Date       | 2023-03-03T09:05:15 |
| 8 Spectrometer Frequency | 376.28              |
| 9 Spectral Width         | 96153.0             |

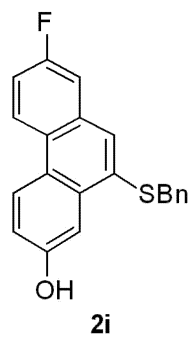

-116.07

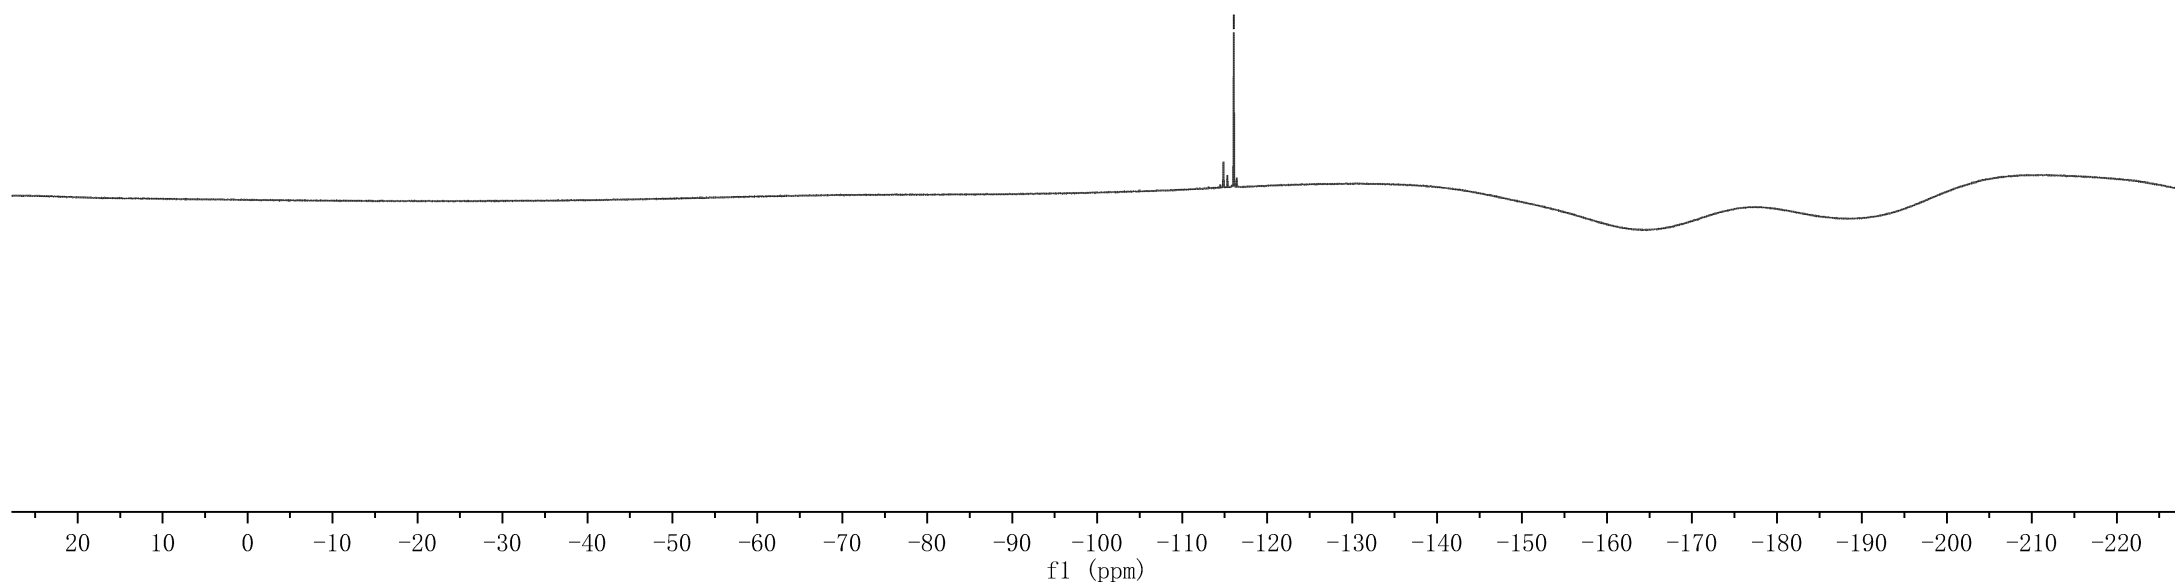

| Parameter                | Value               |
|--------------------------|---------------------|
| 1 Title                  | 2j-H-fxy-5-124-h    |
| 2 Origin                 |                     |
| 3 Solvent                | CDC13               |
| 4 Temperature            | 298.8               |
| 5 Number of Scans        | 16                  |
| 6 Acquisition Time       | 4.0002              |
| 7 Acquisition Date       | 2021-07-21T10:59:09 |
| 8 Spectrometer Frequency | 399.93              |
| 9 Spectral Width         | 8012.0              |

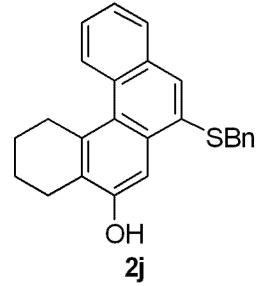

8.606  
8.585  
7.809  
7.707  
7.704  
7.689  
7.686  
7.511  
7.494  
7.473  
7.436  
7.258  
7.253  
7.245  
7.226

5.283

4.156

3.525  
3.511  
3.497

2.950  
2.933  
2.916

2.023  
2.007  
1.993  
1.961  
1.801  
1.787  
1.773  
1.744

0.000

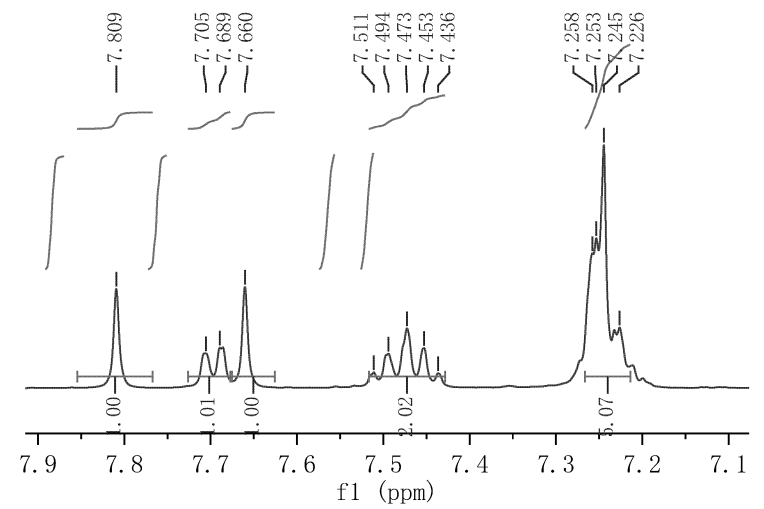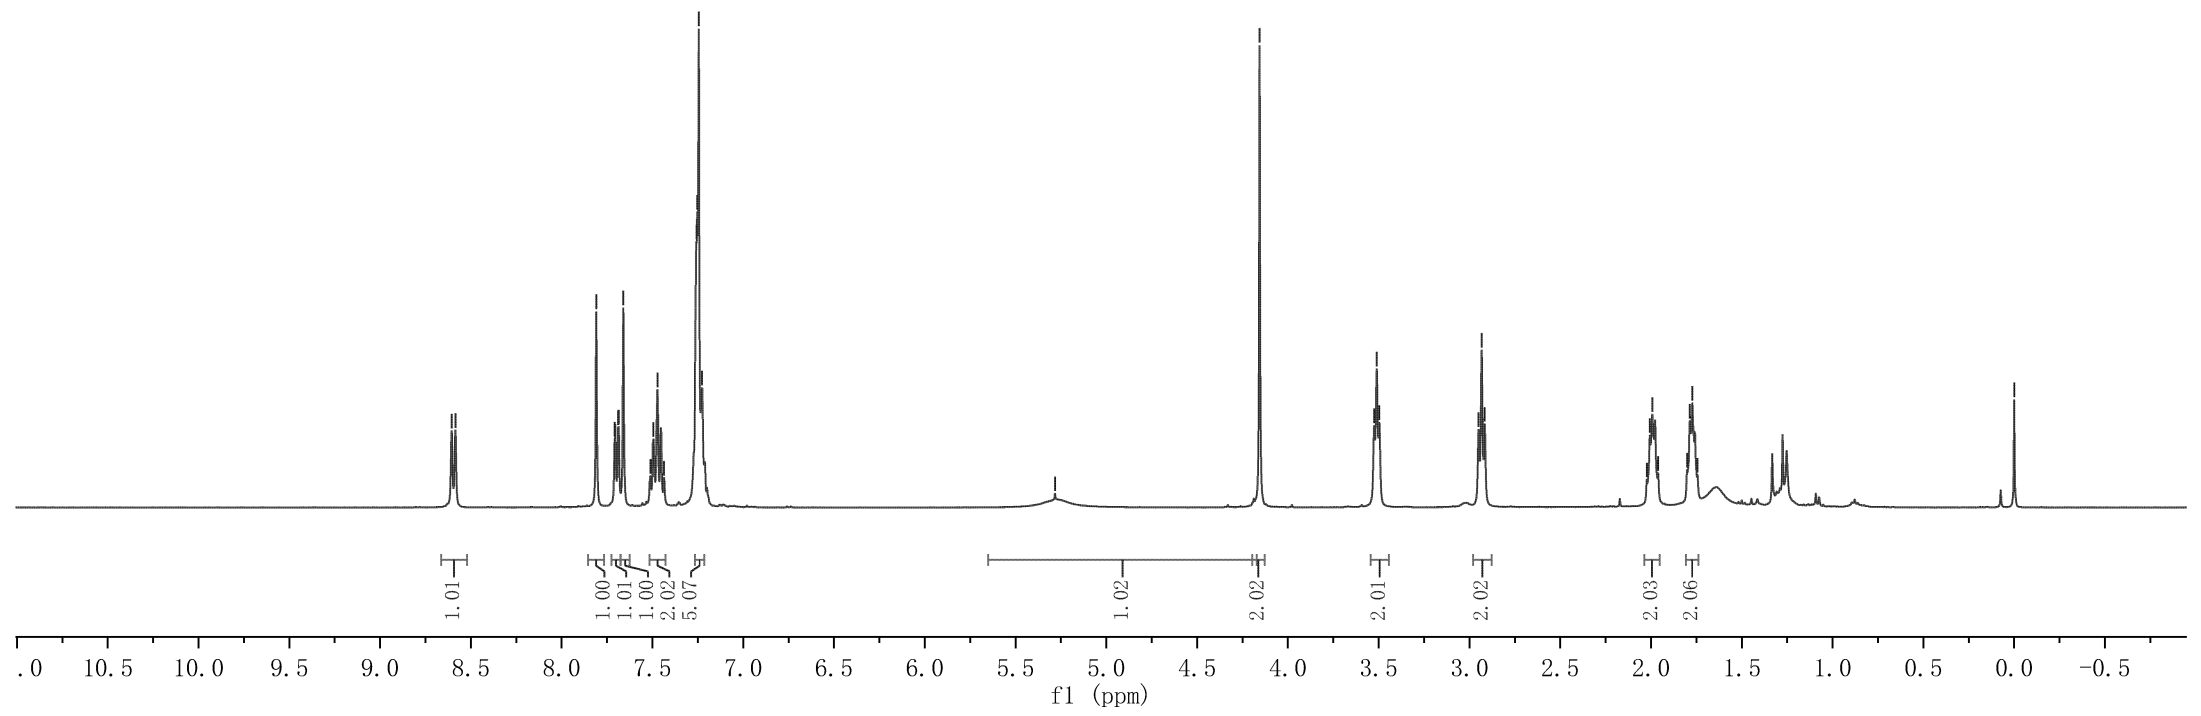

| Parameter                | Value               |
|--------------------------|---------------------|
| 1 Title                  | 2j-C-fxy-5-124-c    |
| 2 Origin                 |                     |
| 3 Solvent                | CDC13               |
| 4 Temperature            | 297.8               |
| 5 Number of Scans        | 200                 |
| 6 Acquisition Time       | 1.0000              |
| 7 Acquisition Date       | 2021-07-21T11:07:54 |
| 8 Spectrometer Frequency | 100.56              |
| 9 Spectral Width         | 26041.0             |

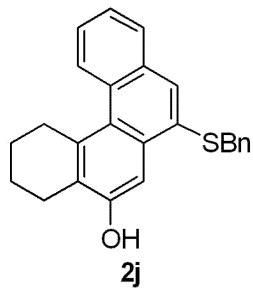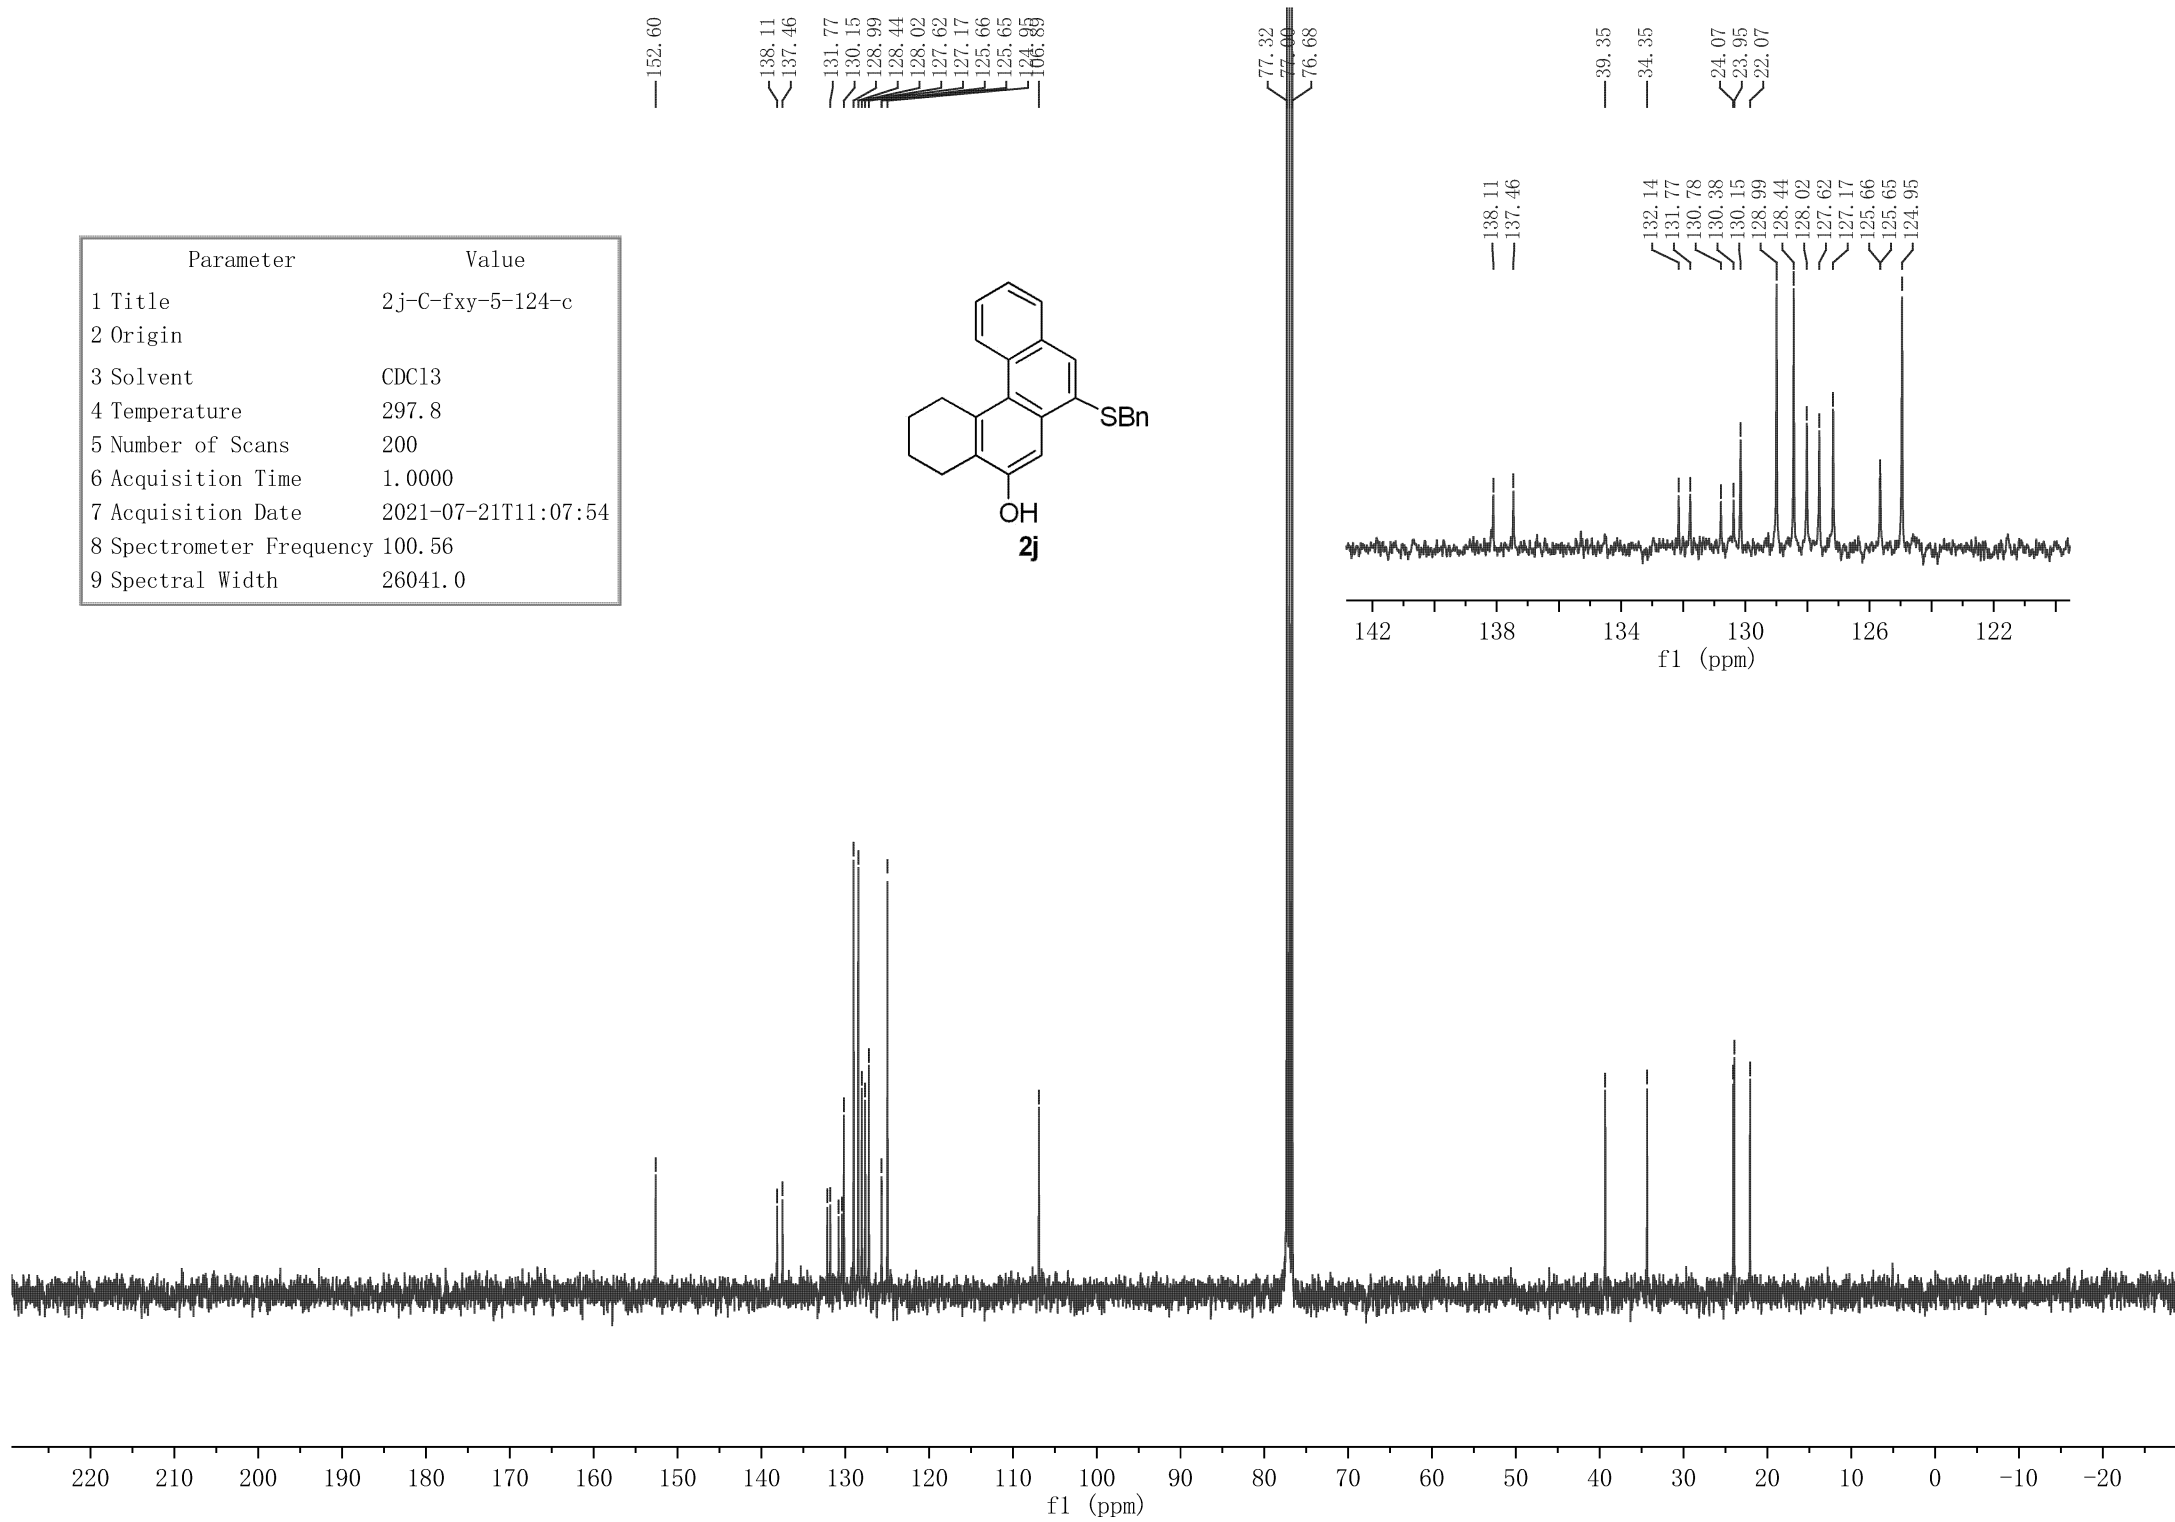

| Parameter                | Value               |
|--------------------------|---------------------|
| 1 Title                  | 2k-H-FXY-2-196-H    |
| 2 Origin                 | Bruker BioSpin GmbH |
| 3 Solvent                | DMSO                |
| 4 Temperature            | 298.0               |
| 5 Number of Scans        | 12                  |
| 6 Acquisition Time       | 4.0894              |
| 7 Acquisition Date       | 2020-07-14T14:49:44 |
| 8 Spectrometer Frequency | 400.13              |
| 9 Spectral Width         | 8012.8              |

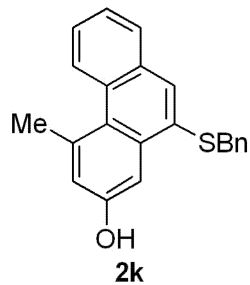

8.644  
8.623  
7.825  
7.822  
7.806  
7.803  
7.773  
7.634  
7.628  
7.553  
7.532  
7.479  
7.462  
7.398  
7.395  
7.389  
7.377  
7.288  
7.271  
7.252  
7.225  
7.212  
7.207  
7.189  
7.102  
7.096

4.324

H<sub>2</sub>O  
3.714

2.970

2.500

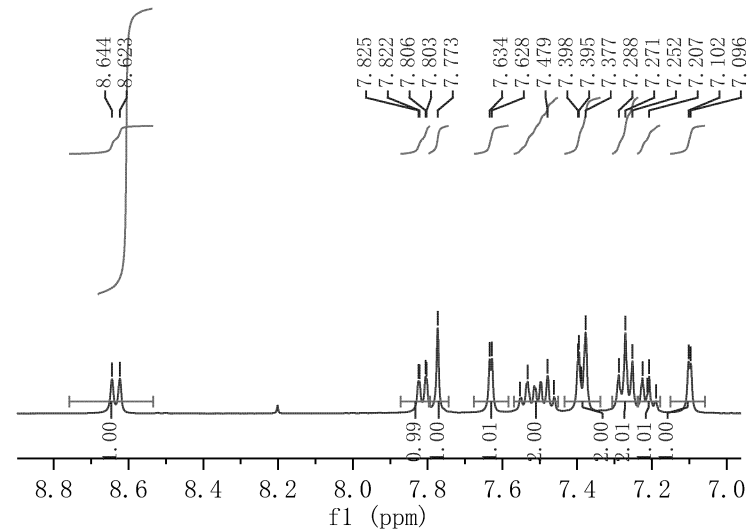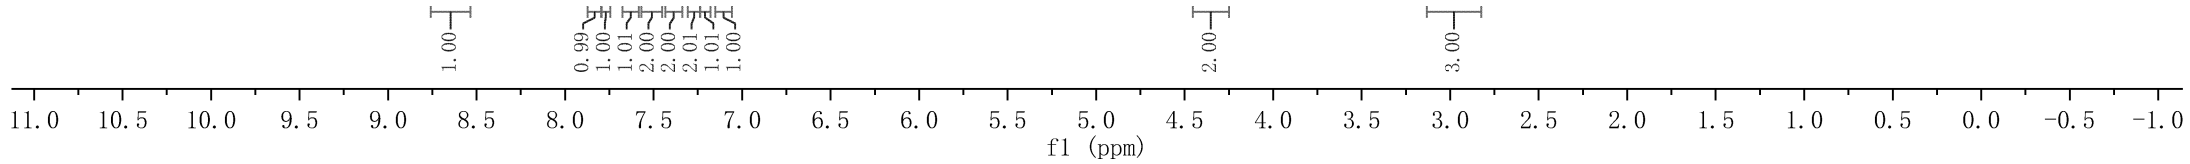

| Parameter                | Value               |
|--------------------------|---------------------|
| 1 Title                  | 2k-C-FXY-2-196-C    |
| 2 Origin                 | Bruker BioSpin GmbH |
| 3 Solvent                | DMSO                |
| 4 Temperature            | 300.0               |
| 5 Number of Scans        | 126                 |
| 6 Acquisition Time       | 1.3631              |
| 7 Acquisition Date       | 2020-07-13T16:16:58 |
| 8 Spectrometer Frequency | 100.61              |
| 9 Spectral Width         | 24038.5             |

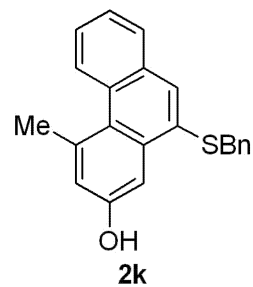

155.27  
 137.77  
 137.05  
 133.46  
 131.23  
 131.20  
 129.94  
 129.05  
 128.41  
 127.93  
 127.18  
 126.94  
 126.22  
 125.65  
 125.02  
 122.88  
 121.53  
 107.03  
 40.13  
 39.92  
 39.71  
 39.50  
 39.29  
 39.08  
 38.88  
 36.70  
 27.04

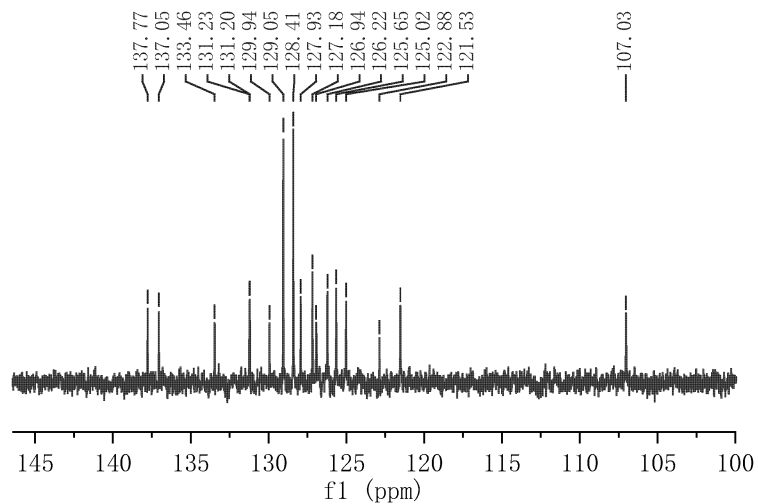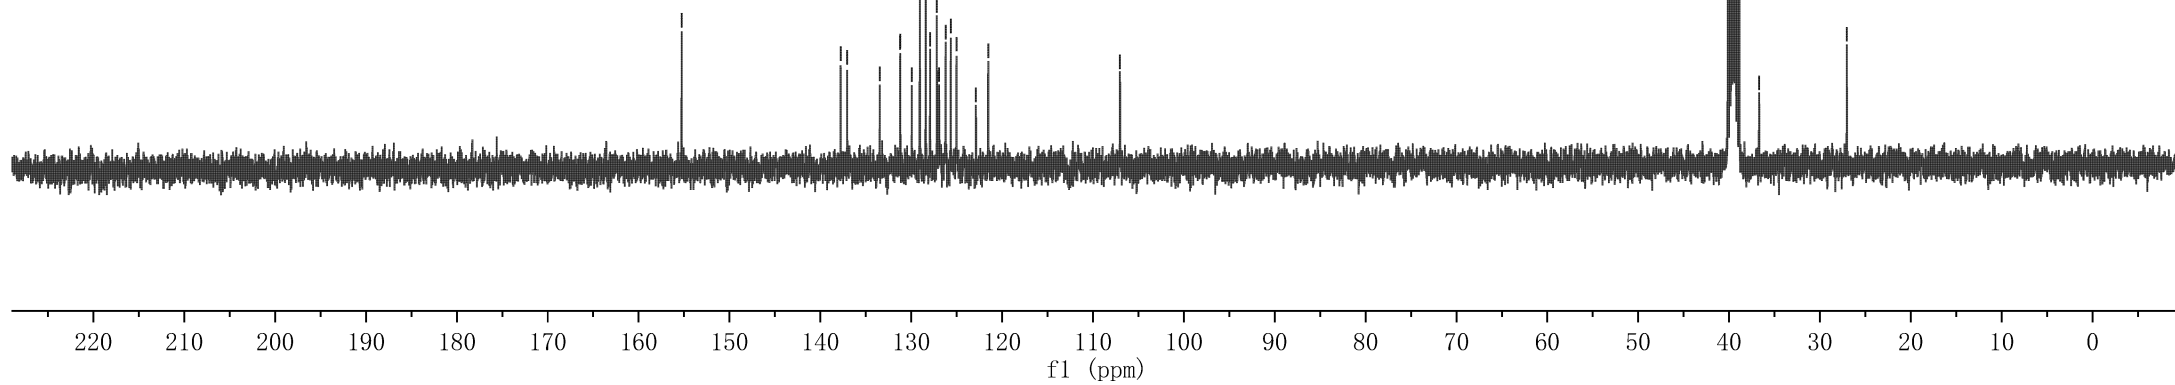



| Parameter                | Value               |
|--------------------------|---------------------|
| 1 Title                  | 21-H-fxy-2-176      |
| 2 Origin                 | Bruker BioSpin GmbH |
| 3 Solvent                | DMSO                |
| 4 Temperature            | 299.0               |
| 5 Number of Scans        | 11                  |
| 6 Acquisition Time       | 3.9846              |
| 7 Acquisition Date       | 2020-07-06T14:03:50 |
| 8 Spectrometer Frequency | 400.03              |
| 9 Spectral Width         | 8223.7              |

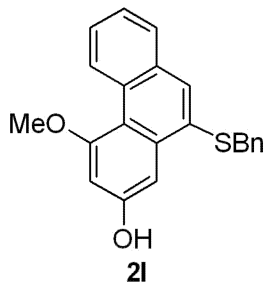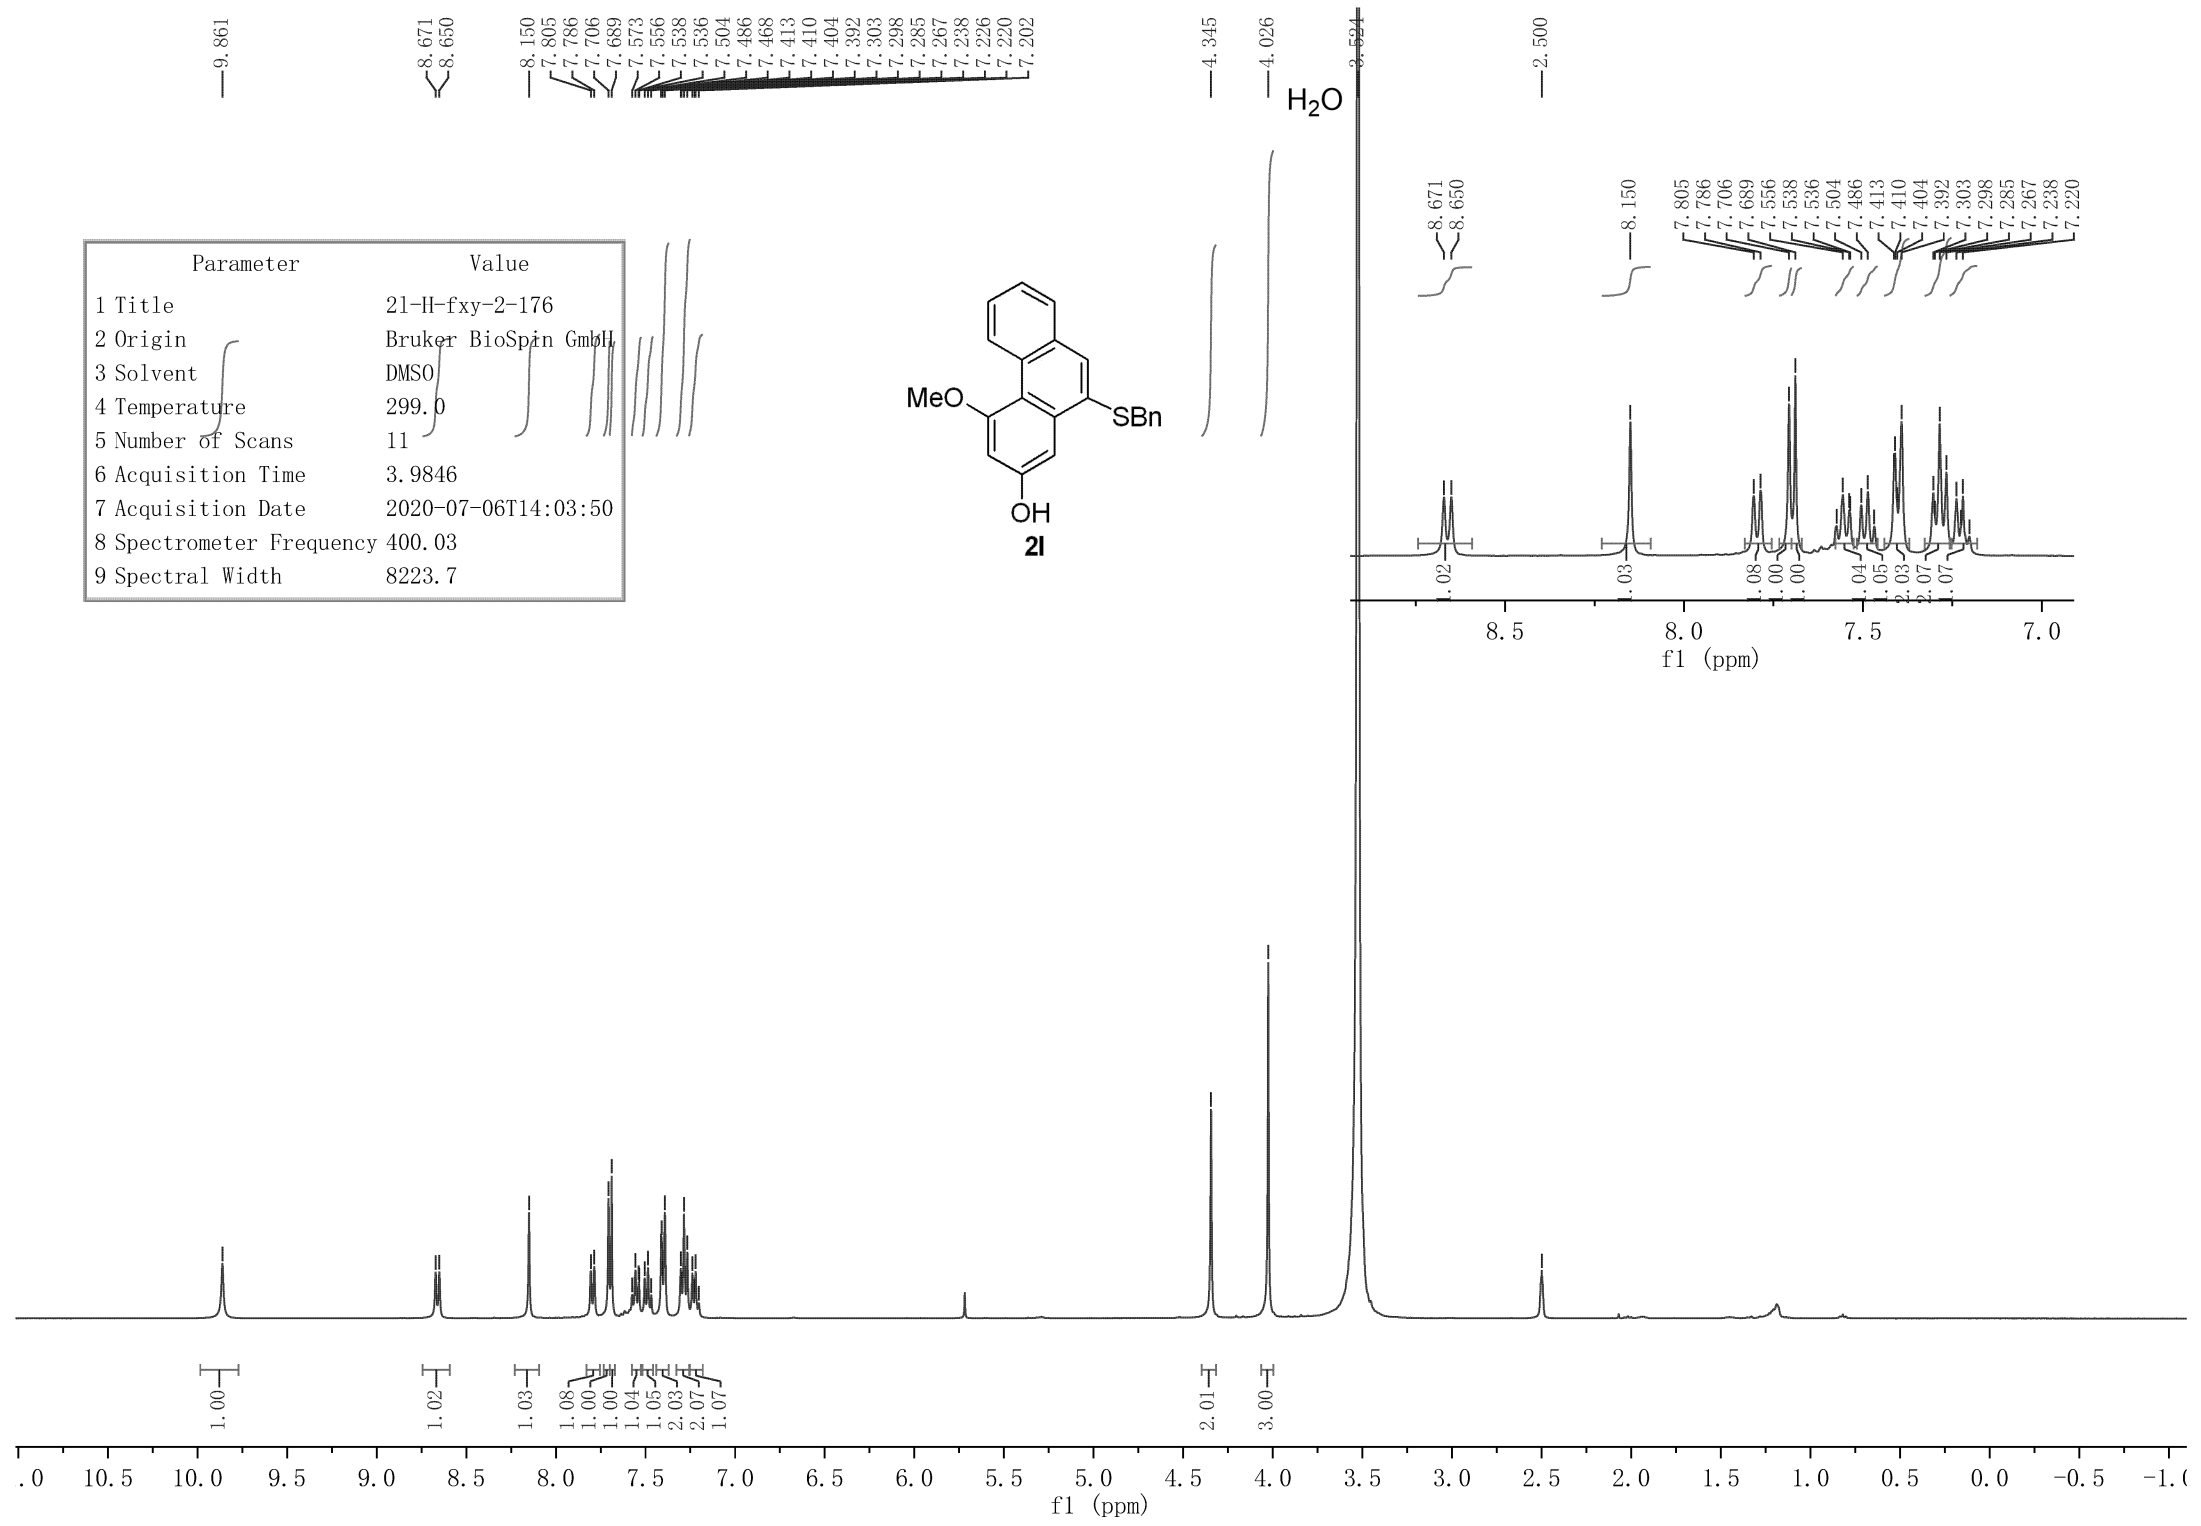

9.861  
8.671  
8.650  
8.150  
7.805  
7.786  
7.706  
7.689  
7.573  
7.556  
7.538  
7.536  
7.504  
7.486  
7.468  
7.413  
7.410  
7.404  
7.392  
7.303  
7.298  
7.285  
7.267  
7.238  
7.226  
7.220  
7.202

4.345  
4.026  
3.594  
2.500

8.671  
8.650  
8.150  
7.805  
7.786  
7.706  
7.689  
7.556  
7.538  
7.536  
7.504  
7.486  
7.413  
7.410  
7.392  
7.303  
7.298  
7.285  
7.267  
7.238  
7.220

0.02  
0.03  
0.08  
0.00  
0.00  
0.04  
0.05  
0.03  
0.07  
0.07

f1 (ppm)

1.00  
1.02  
1.03  
1.08  
1.00  
1.00  
1.04  
1.05  
2.03  
2.07  
1.07

2.01  
3.00

10.0 9.5 9.0 8.5 8.0 7.5 7.0 6.5 6.0 5.5 5.0 4.5 4.0 3.5 3.0 2.5 2.0 1.5 1.0 0.5 0.0 -0.5 -1.0

f1 (ppm)

| Parameter                | Value               |
|--------------------------|---------------------|
| 1 Title                  | 21-C-fxy-2-176-c    |
| 2 Origin                 | Bruker BioSpin GmbH |
| 3 Solvent                | DMSO                |
| 4 Temperature            | 299.0               |
| 5 Number of Scans        | 103                 |
| 6 Acquisition Time       | 1.3631              |
| 7 Acquisition Date       | 2020-07-06T14:07:20 |
| 8 Spectrometer Frequency | 100.59              |
| 9 Spectral Width         | 24038.5             |

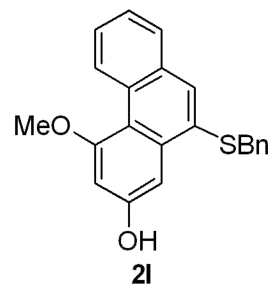

149.11  
147.50  
137.25  
130.55  
130.43  
129.16  
128.63  
128.55  
127.32  
126.21  
125.60  
124.35  
124.01  
108.93  
104.71

55.97  
40.13  
39.92  
39.71  
39.50  
39.29  
39.08  
38.87  
36.80

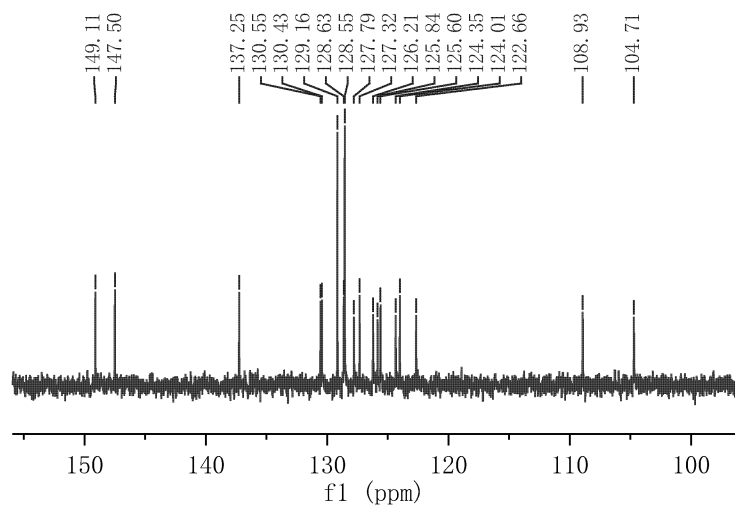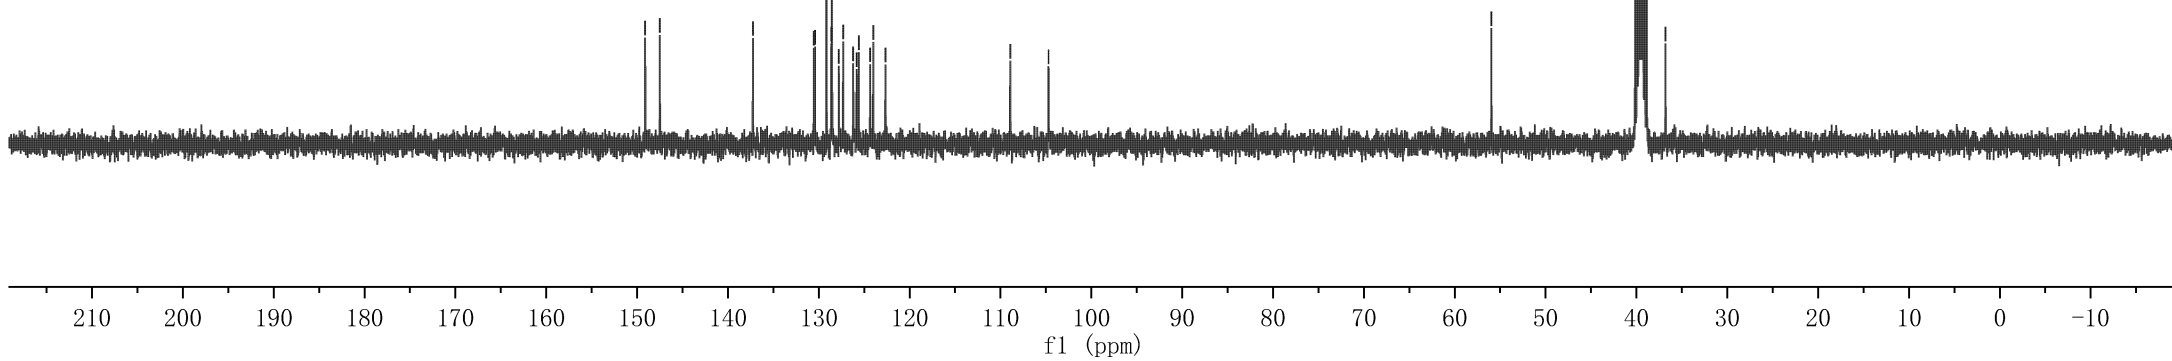

| Parameter                | Value               |
|--------------------------|---------------------|
| 1 Title                  | 2m-H-fxy-3-81       |
| 2 Origin                 | Bruker BioSpin GmbH |
| 3 Solvent                | DMSO                |
| 4 Temperature            | 298.0               |
| 5 Number of Scans        | 18                  |
| 6 Acquisition Time       | 4.0894              |
| 7 Acquisition Date       | 2021-05-17T16:01:08 |
| 8 Spectrometer Frequency | 400.13              |
| 9 Spectral Width         | 8012.8              |

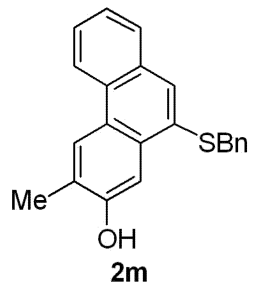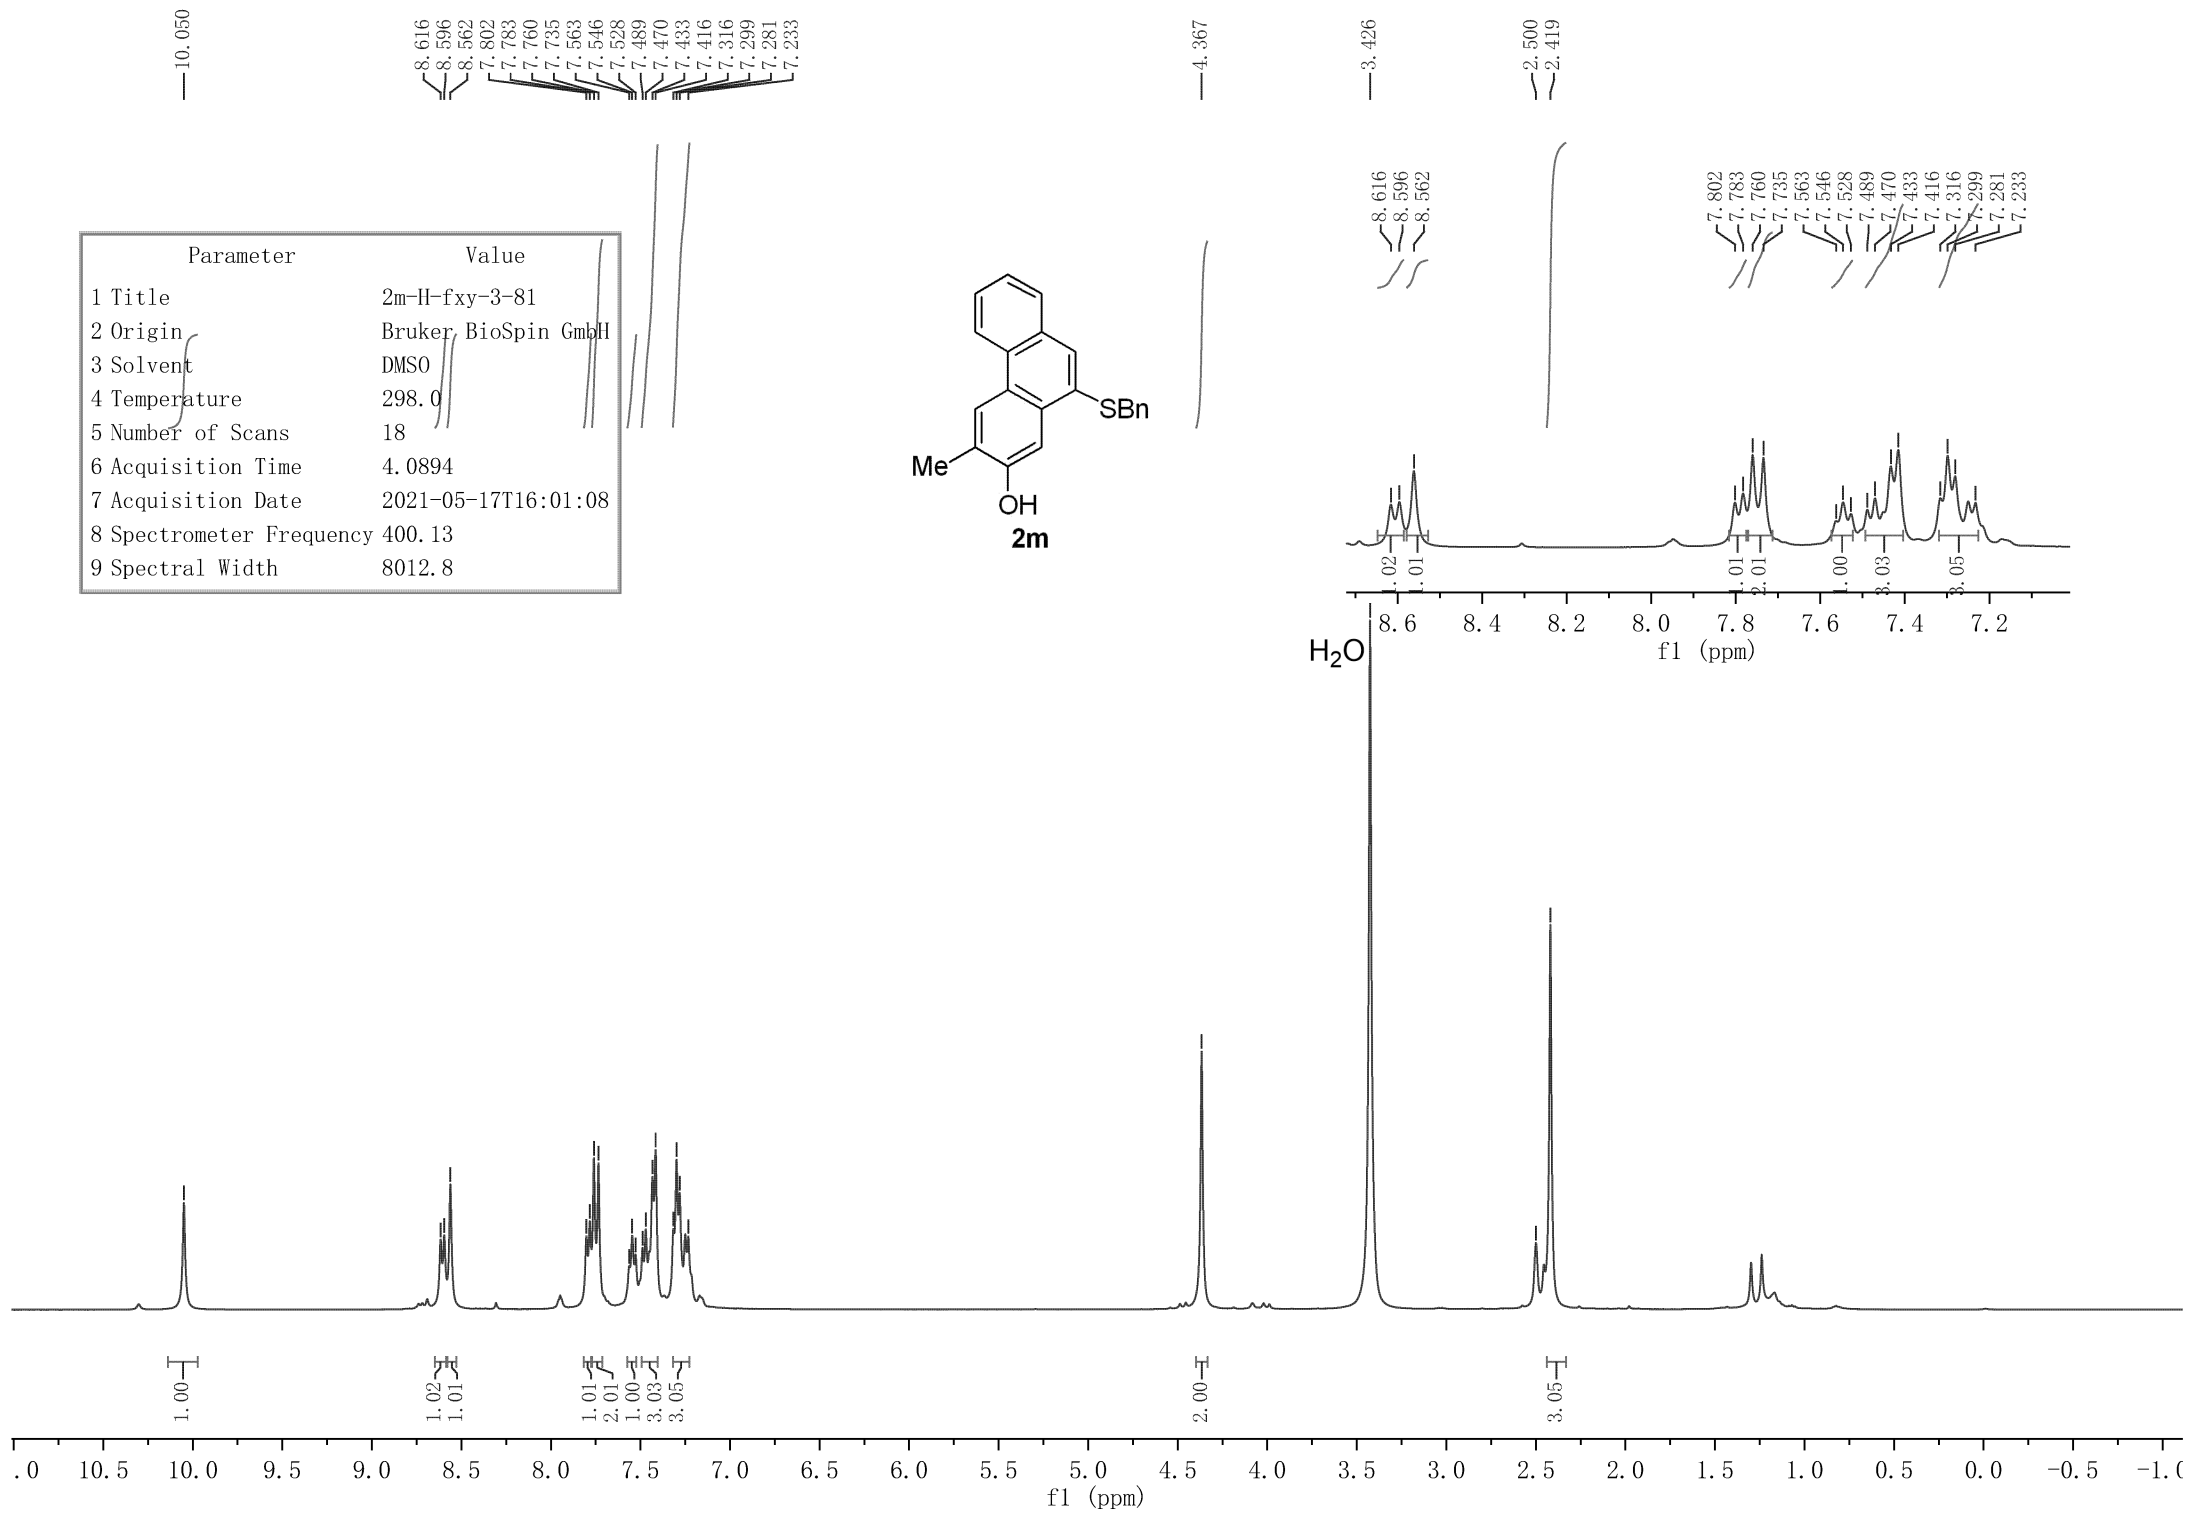

| Parameter                | Value               |
|--------------------------|---------------------|
| 1 Title                  | 2m-C-fxy-3-81-c     |
| 2 Origin                 | Bruker BioSpin GmbH |
| 3 Solvent                | DMSO                |
| 4 Temperature            | 300.0               |
| 5 Number of Scans        | 51                  |
| 6 Acquisition Time       | 1.3631              |
| 7 Acquisition Date       | 2021-05-17T16:03:14 |
| 8 Spectrometer Frequency | 100.61              |
| 9 Spectral Width         | 24038.5             |

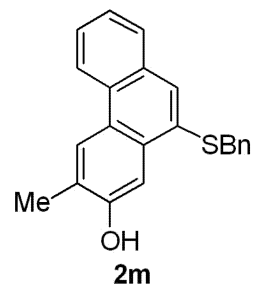

155.42  
137.11  
130.52  
130.10  
129.02  
128.40  
127.65  
127.16  
126.65  
126.34  
125.51  
125.19  
124.45  
40.12  
39.92  
39.71  
39.50  
39.29  
39.08  
38.87  
36.61  
16.60

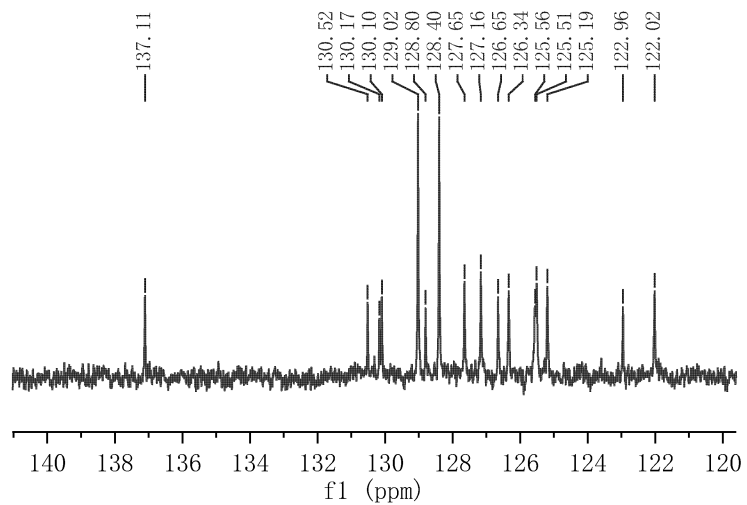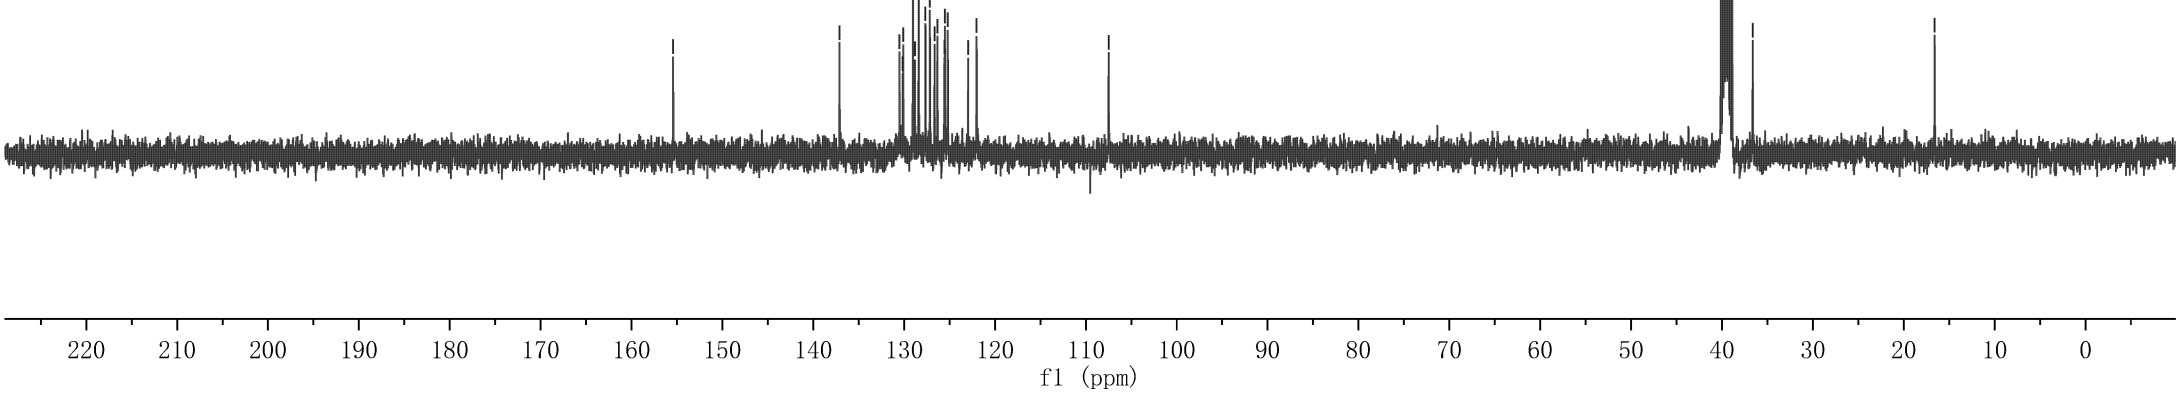

| Parameter                | Value               |
|--------------------------|---------------------|
| 1 Title                  | 2n-H-fxy-3-107      |
| 2 Origin                 | Bruker BioSpin GmbH |
| 3 Solvent                | DMSO                |
| 4 Temperature            | 298.0               |
| 5 Number of Scans        | 8                   |
| 6 Acquisition Time       | 4.0894              |
| 7 Acquisition Date       | 2021-05-17T16:20:17 |
| 8 Spectrometer Frequency | 400.13              |
| 9 Spectral Width         | 8012.8              |

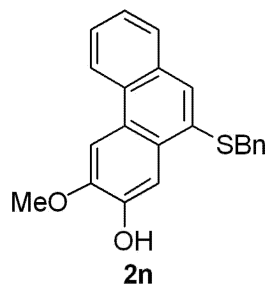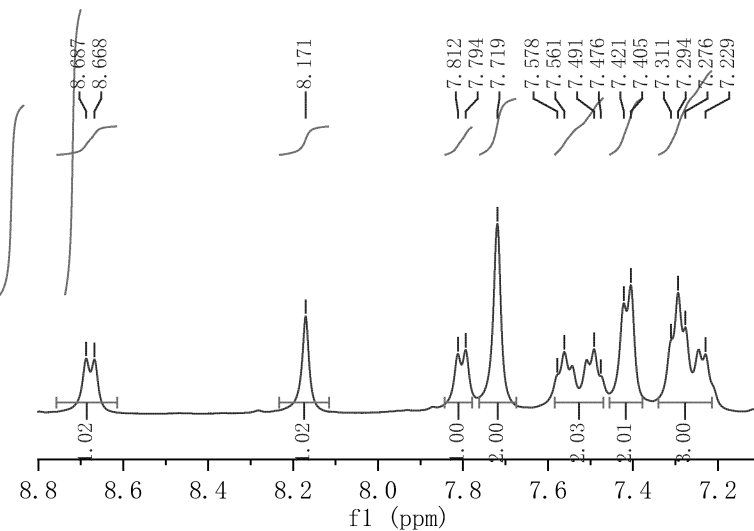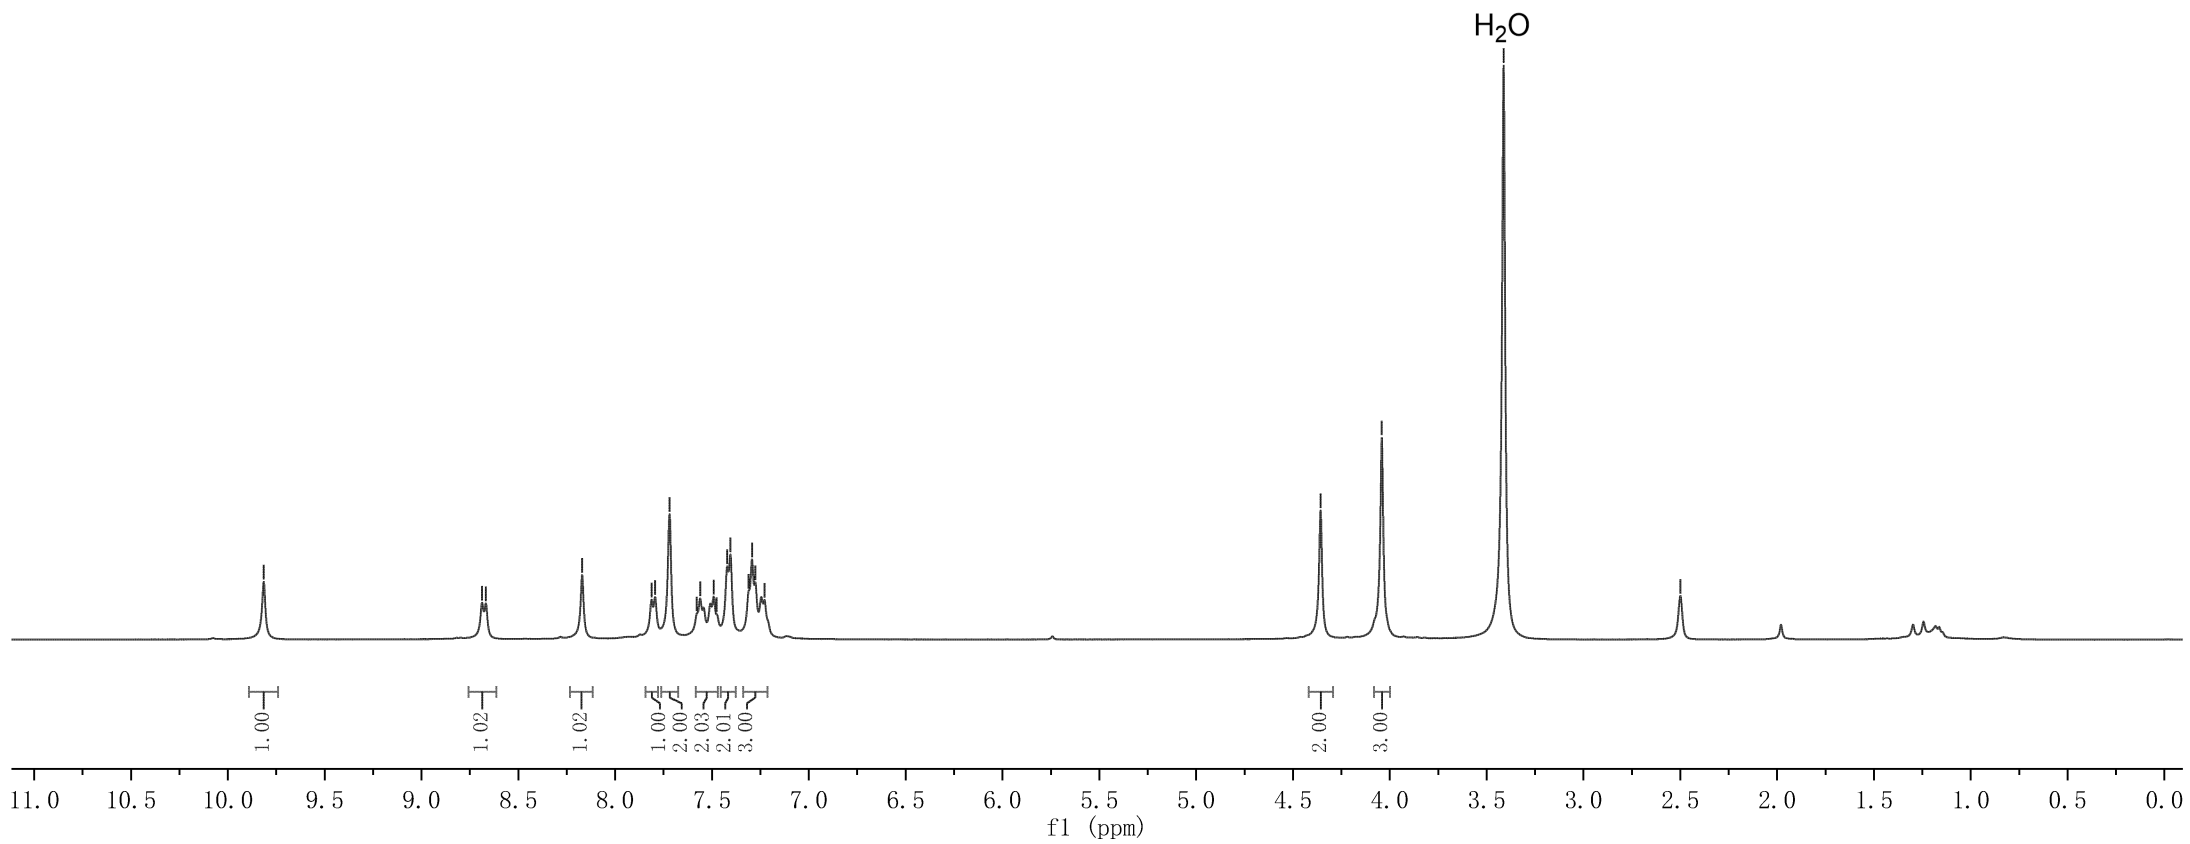

| Parameter                | Value               |
|--------------------------|---------------------|
| 1 Title                  | 2n-C-fxy-3-107-c    |
| 2 Origin                 | Bruker BioSpin GmbH |
| 3 Solvent                | DMSO                |
| 4 Temperature            | 300.0               |
| 5 Number of Scans        | 63                  |
| 6 Acquisition Time       | 1.3631              |
| 7 Acquisition Date       | 2021-05-17T16:21:38 |
| 8 Spectrometer Frequency | 100.61              |
| 9 Spectral Width         | 24038.5             |



148.99  
147.42  
137.15  
130.42  
130.32  
129.01  
128.39  
127.65  
127.15  
126.02  
125.65  
124.32  
108.54  
105.91  
104.65

55.84  
40.13  
39.92  
39.71  
39.50  
39.29  
39.08  
38.87  
36.73

137.15  
130.42  
130.32  
129.01  
128.39  
127.65  
127.15  
126.02  
125.65  
125.52  
124.32  
123.88  
122.54

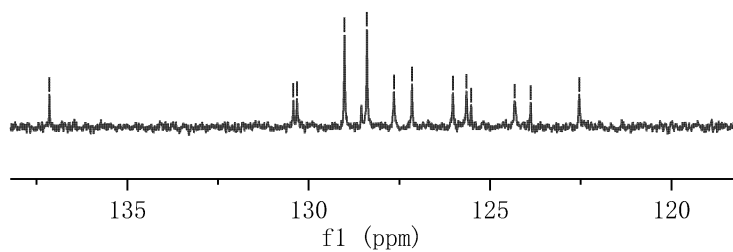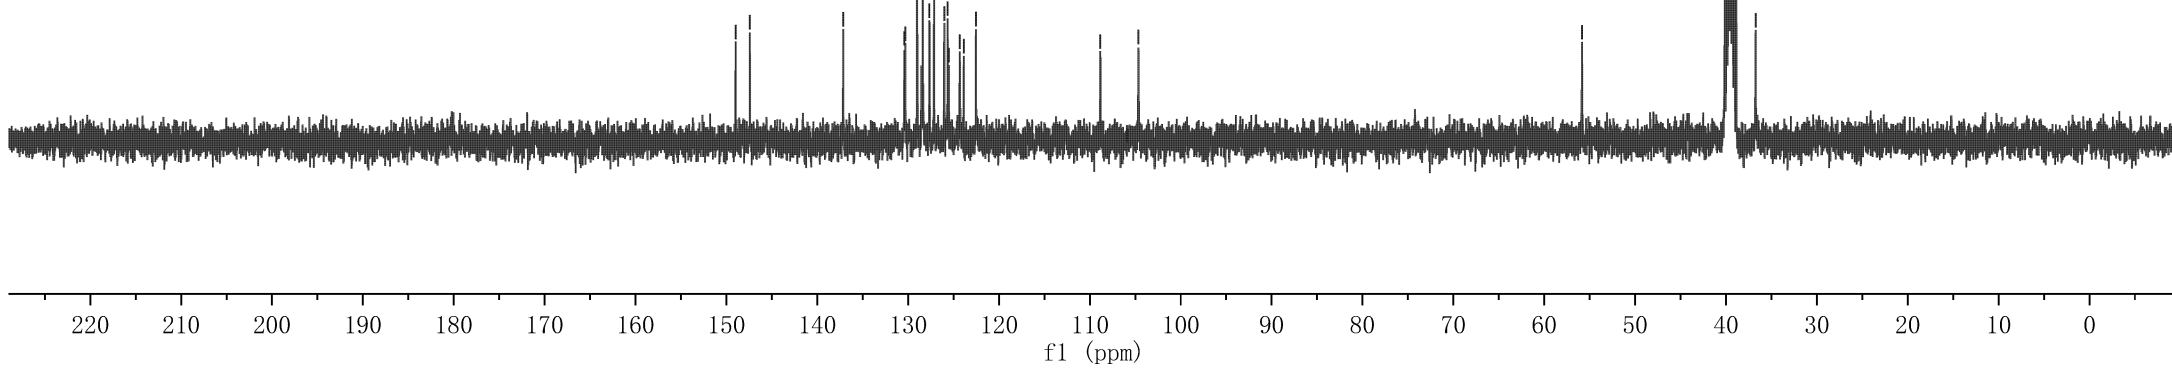

| Parameter                | Value               |
|--------------------------|---------------------|
| 1 Title                  | 2o-H                |
| 2 Origin                 |                     |
| 3 Solvent                | CDC13               |
| 4 Temperature            | 297.1               |
| 5 Number of Scans        | 30                  |
| 6 Acquisition Time       | 4.0002              |
| 7 Acquisition Date       | 2023-02-07T17:44:55 |
| 8 Spectrometer Frequency | 399.90              |
| 9 Spectral Width         | 8012.0              |

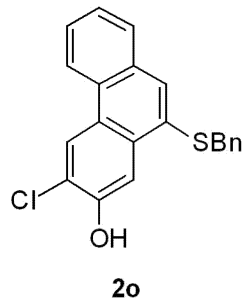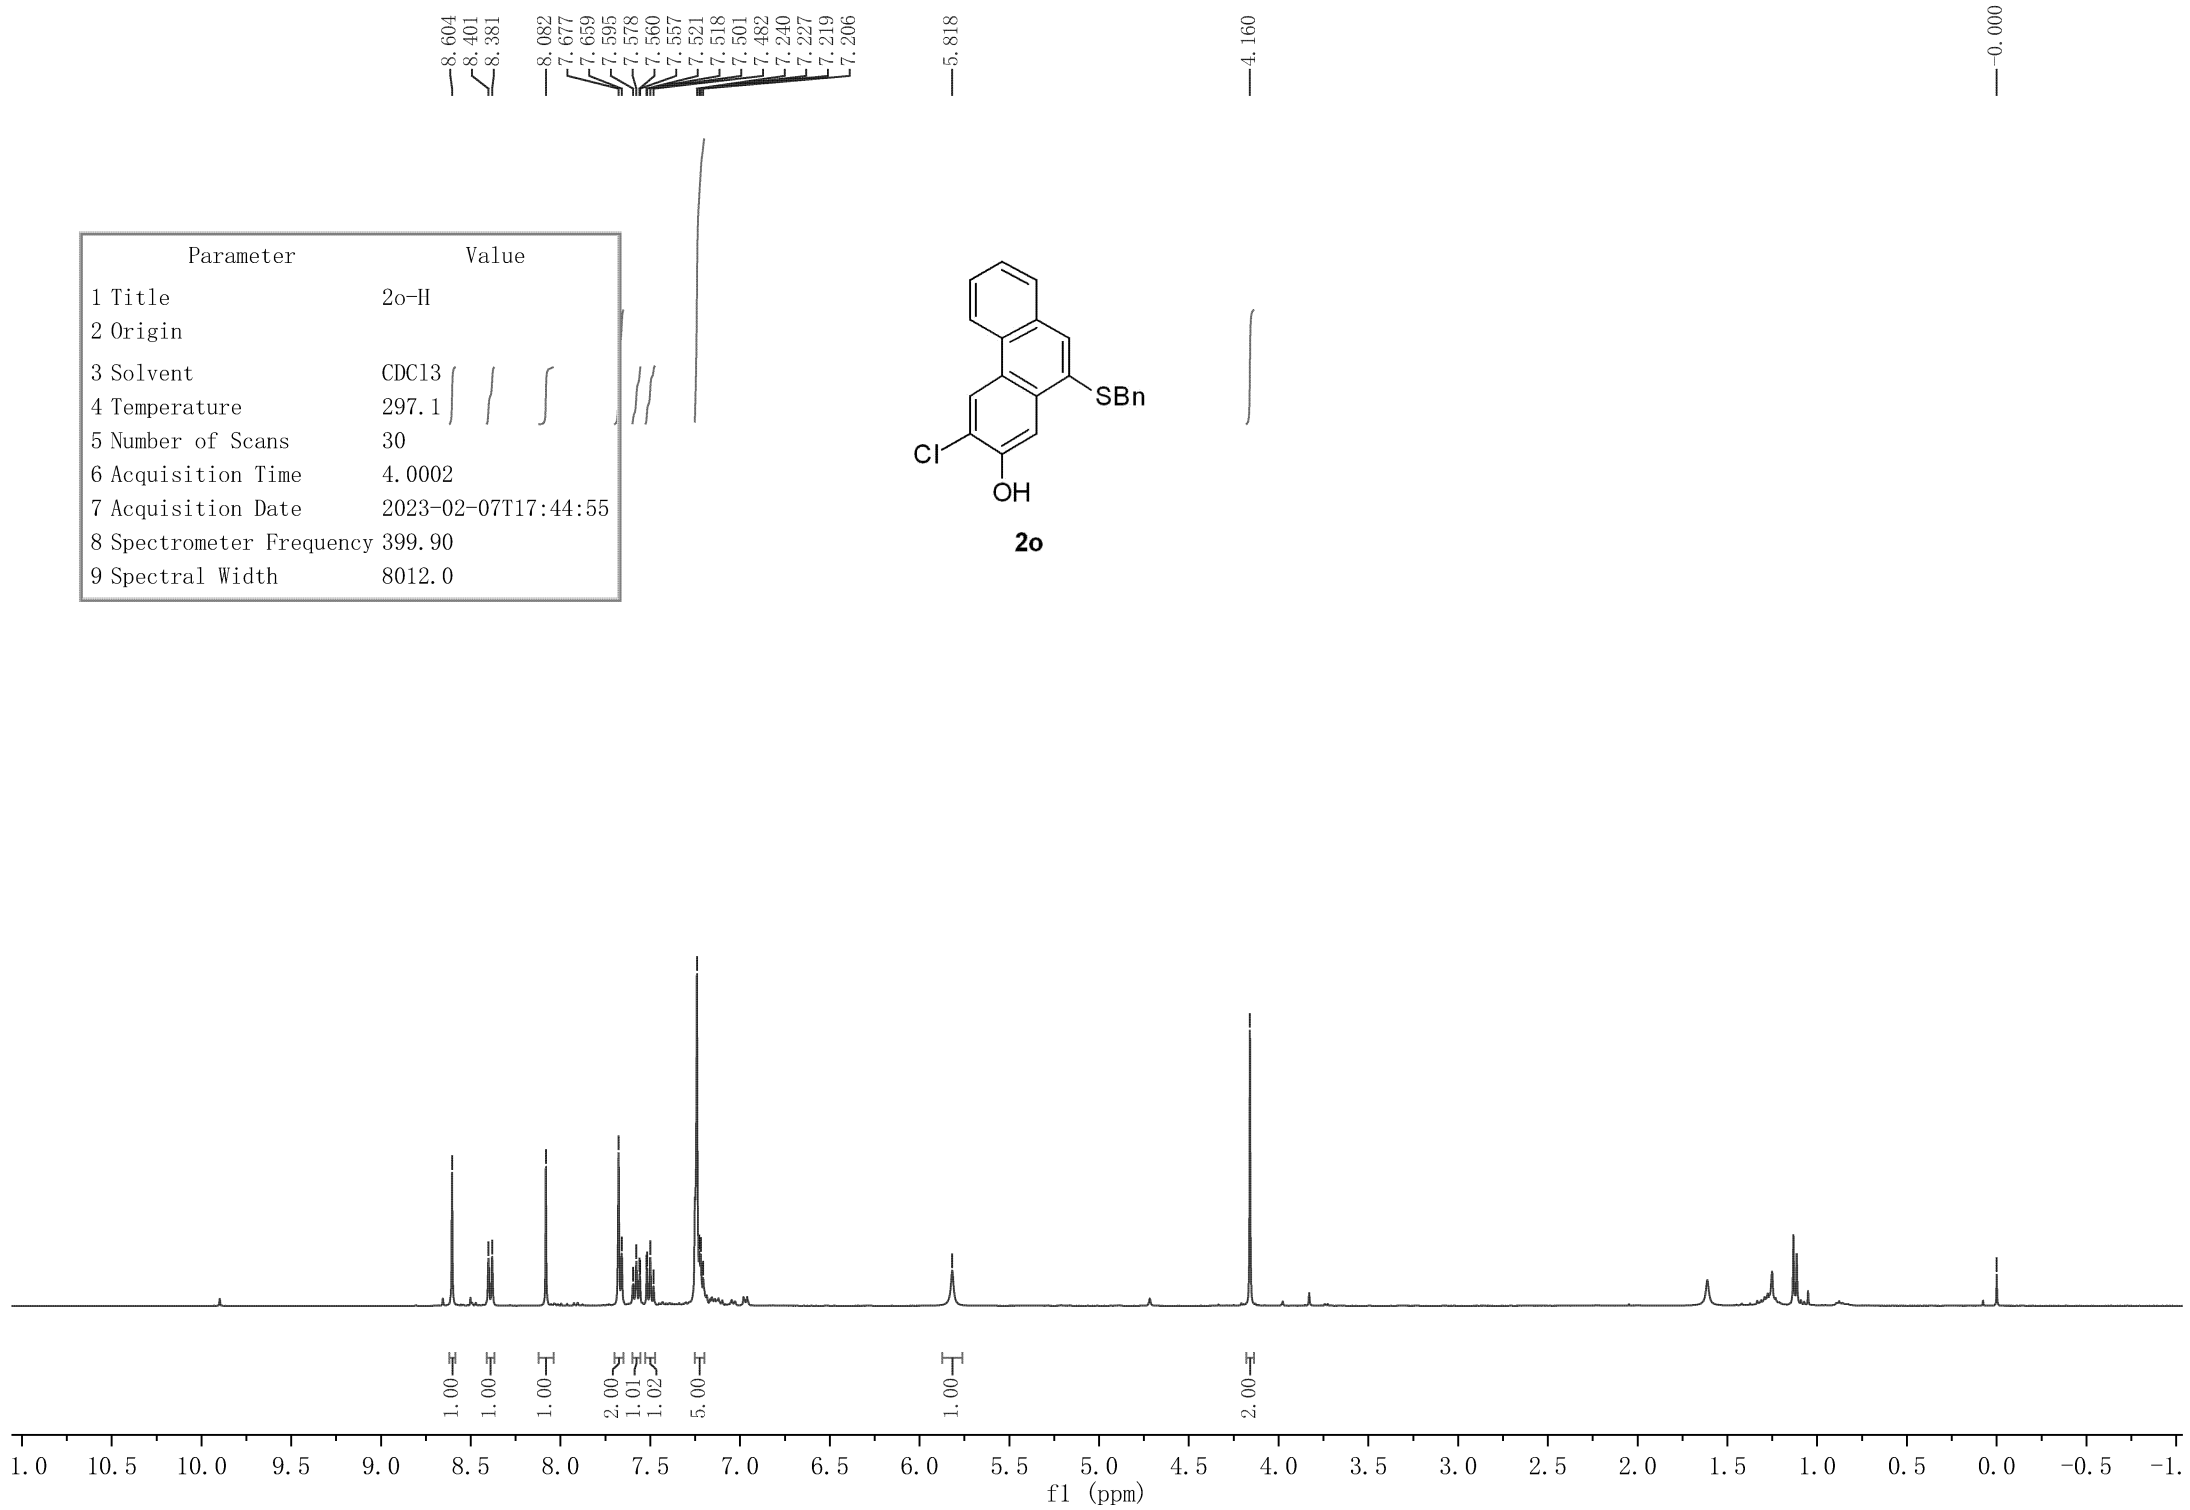

| Parameter                | Value               |
|--------------------------|---------------------|
| 1 Title                  | 2o-C                |
| 2 Origin                 |                     |
| 3 Solvent                | CDC13               |
| 4 Temperature            | 295.6               |
| 5 Number of Scans        | 300                 |
| 6 Acquisition Time       | 1.0000              |
| 7 Acquisition Date       | 2023-02-05T21:54:41 |
| 8 Spectrometer Frequency | 100.56              |
| 9 Spectral Width         | 26041.0             |

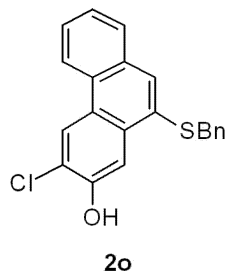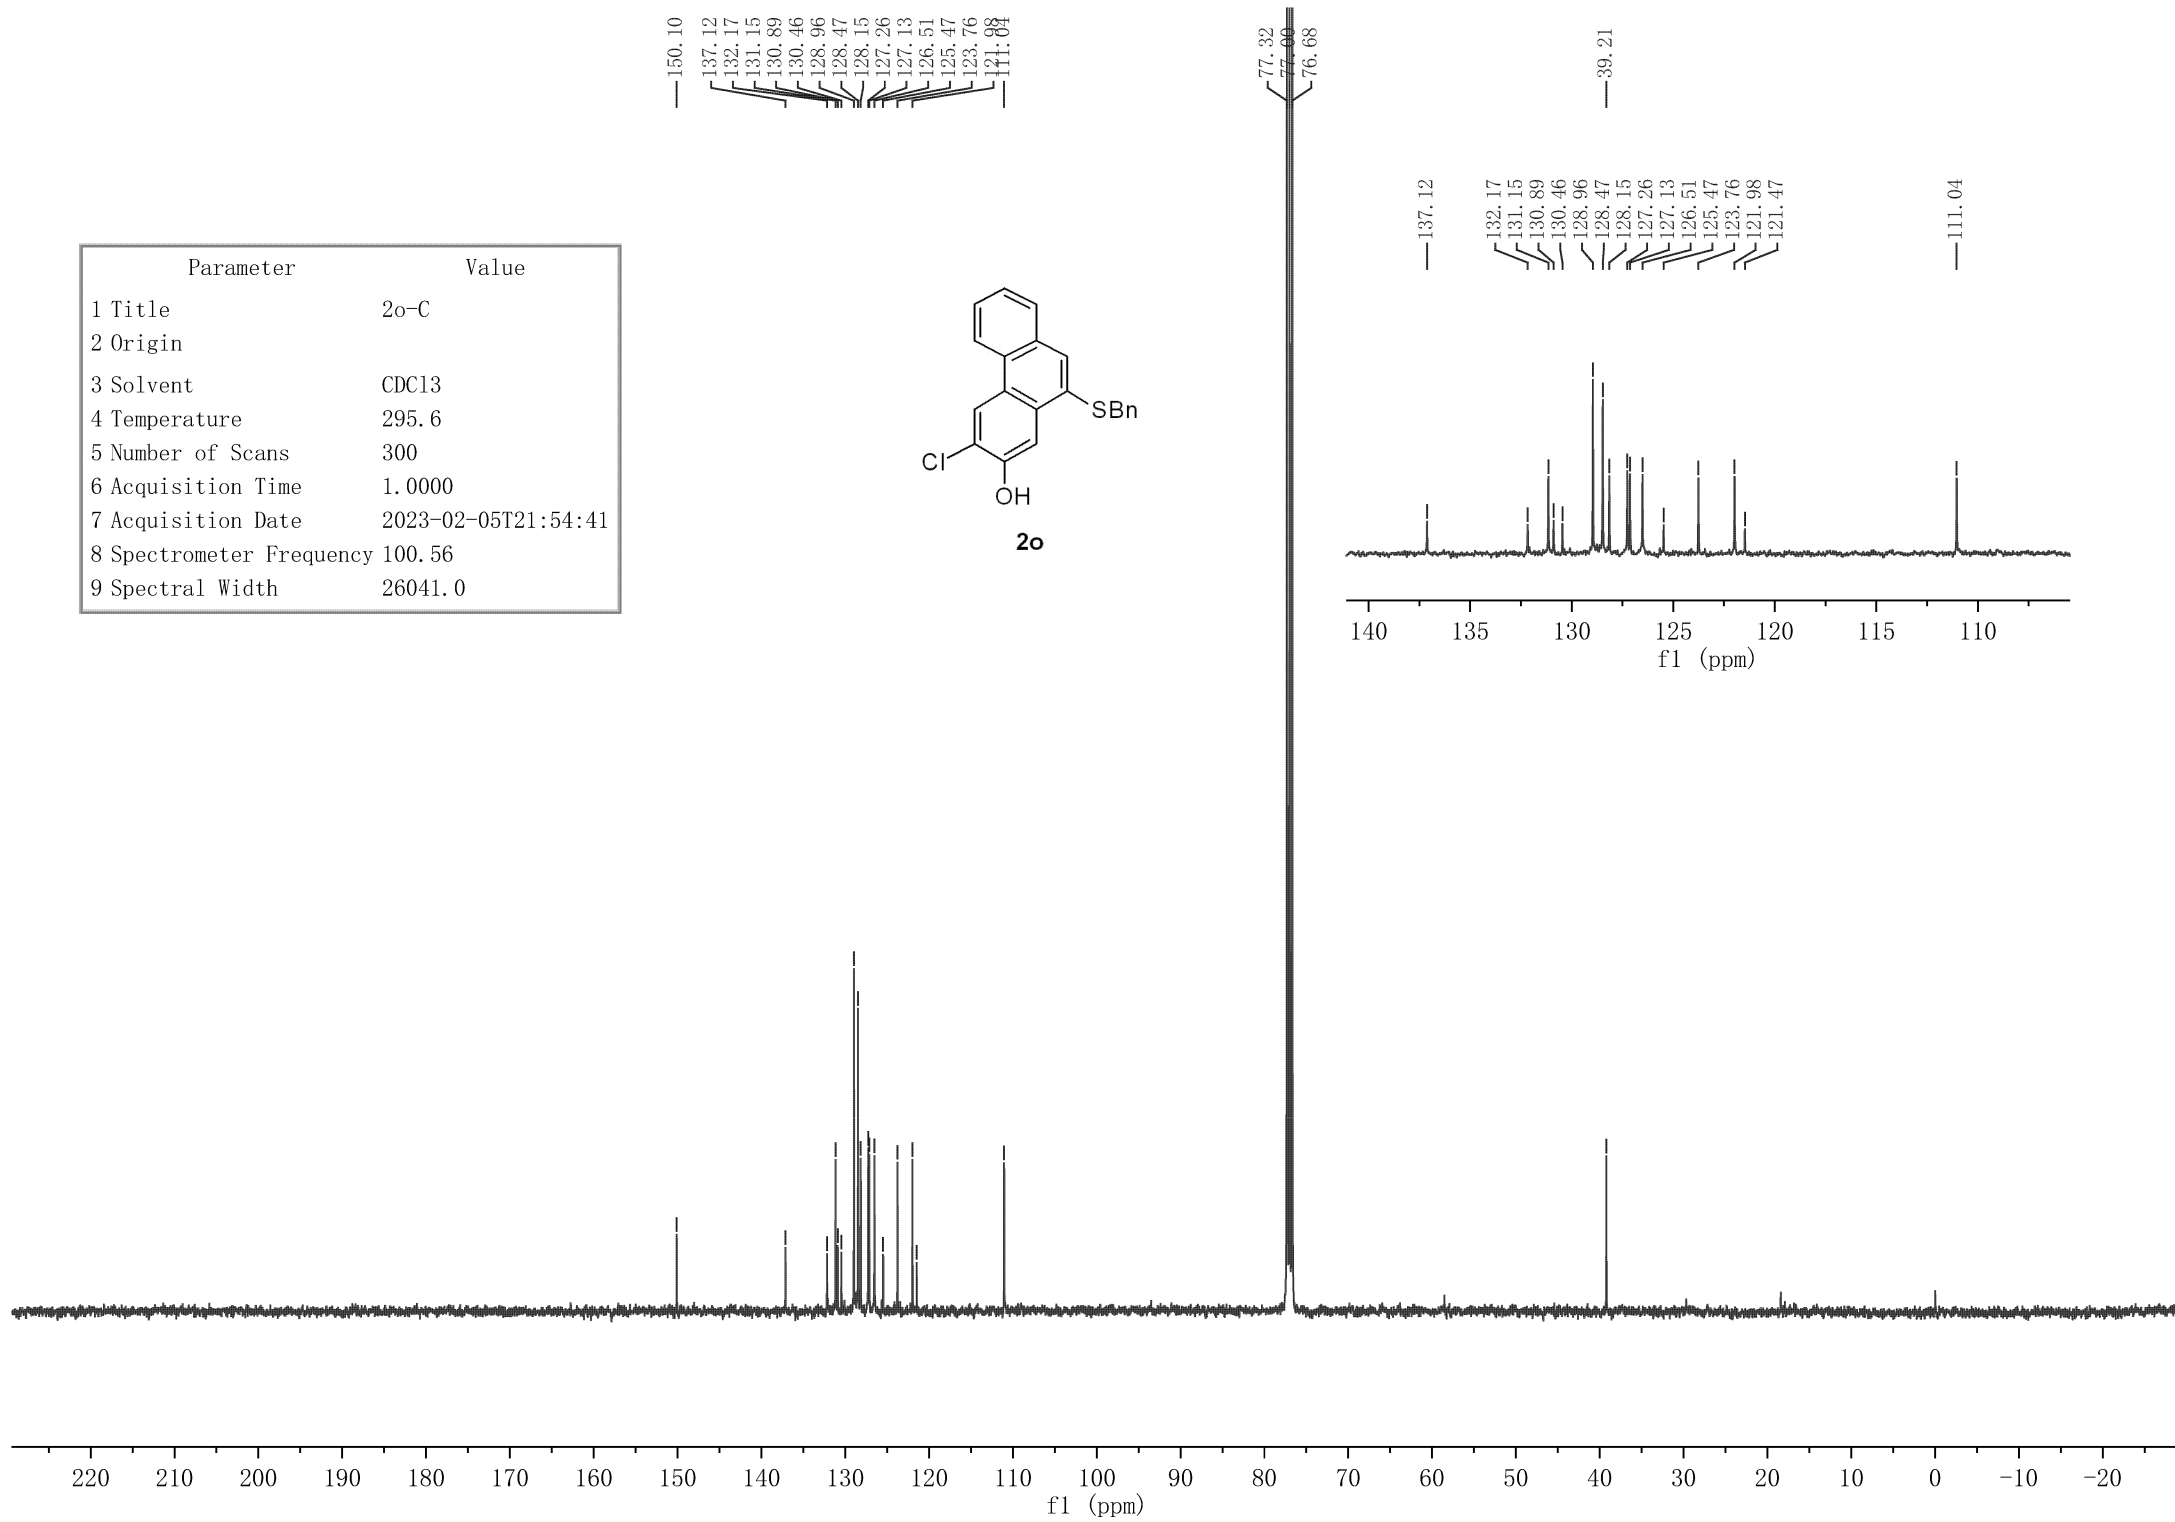



| Parameter                | Value               |
|--------------------------|---------------------|
| 1 Title                  | 3a-H-fxy-2-140-a    |
| 2 Origin                 | Bruker BioSpin GmbH |
| 3 Solvent                | CDC13               |
| 4 Temperature            | 298.0               |
| 5 Number of Scans        | 5                   |
| 6 Acquisition Time       | 4.0894              |
| 7 Acquisition Date       | 2020-06-19T20:19:20 |
| 8 Spectrometer Frequency | 400.13              |
| 9 Spectral Width         | 8012.8              |

7.369  
7.351  
7.314  
7.232  
7.131  
7.112  
7.109  
7.091  
7.038  
7.020  
6.706  
6.505  
6.480  
6.341  
6.316

4.129

0.000

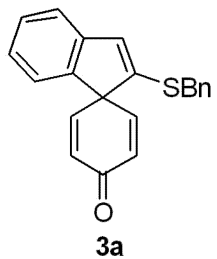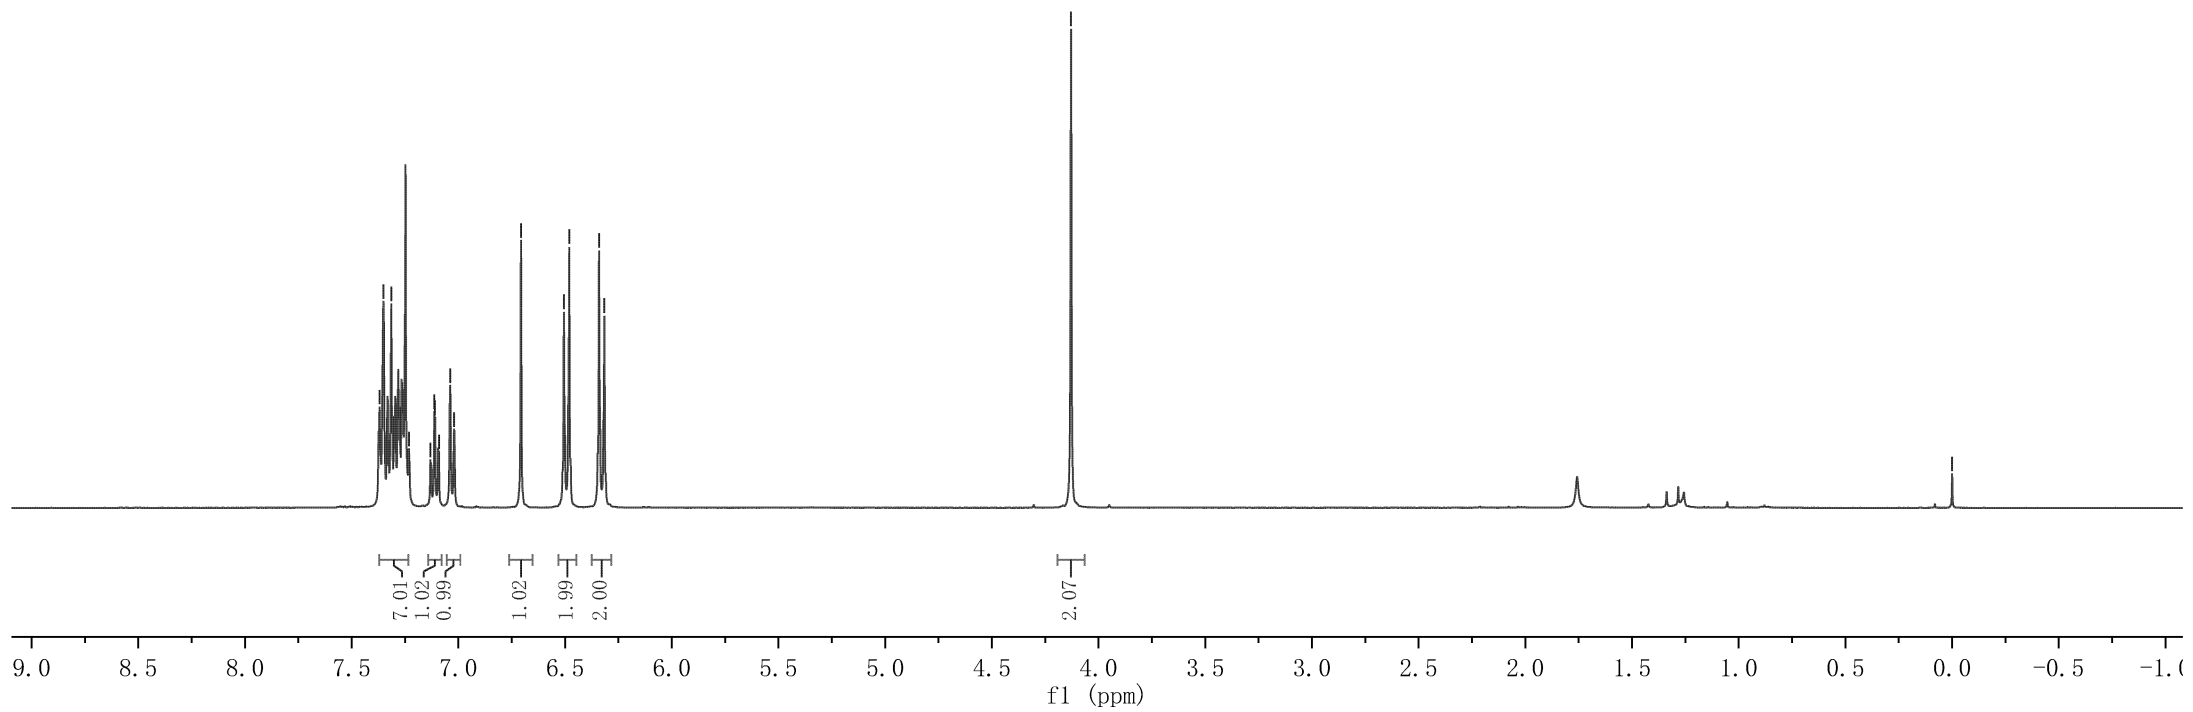

| Parameter                | Value               |
|--------------------------|---------------------|
| 1 Title                  | 3a-C-fxy-2-140-a-C  |
| 2 Origin                 | Bruker BioSpin GmbH |
| 3 Solvent                | CDC13               |
| 4 Temperature            | 300.0               |
| 5 Number of Scans        | 12                  |
| 6 Acquisition Time       | 1.3631              |
| 7 Acquisition Date       | 2020-06-19T20:20:27 |
| 8 Spectrometer Frequency | 100.61              |
| 9 Spectral Width         | 24038.5             |



185.95

147.84  
145.93  
144.33  
141.09  
135.70  
130.81  
128.71  
128.64  
127.61  
127.27  
125.28  
123.28  
119.96

77.32  
77.00  
76.68

61.00

37.40

147.84  
145.93  
144.33

141.09

135.70

130.81  
128.71  
128.64  
127.61  
127.27  
125.28  
123.28

119.96

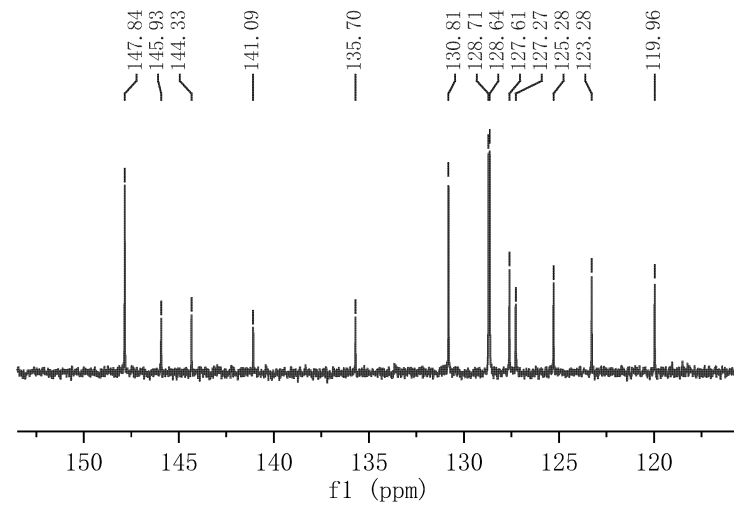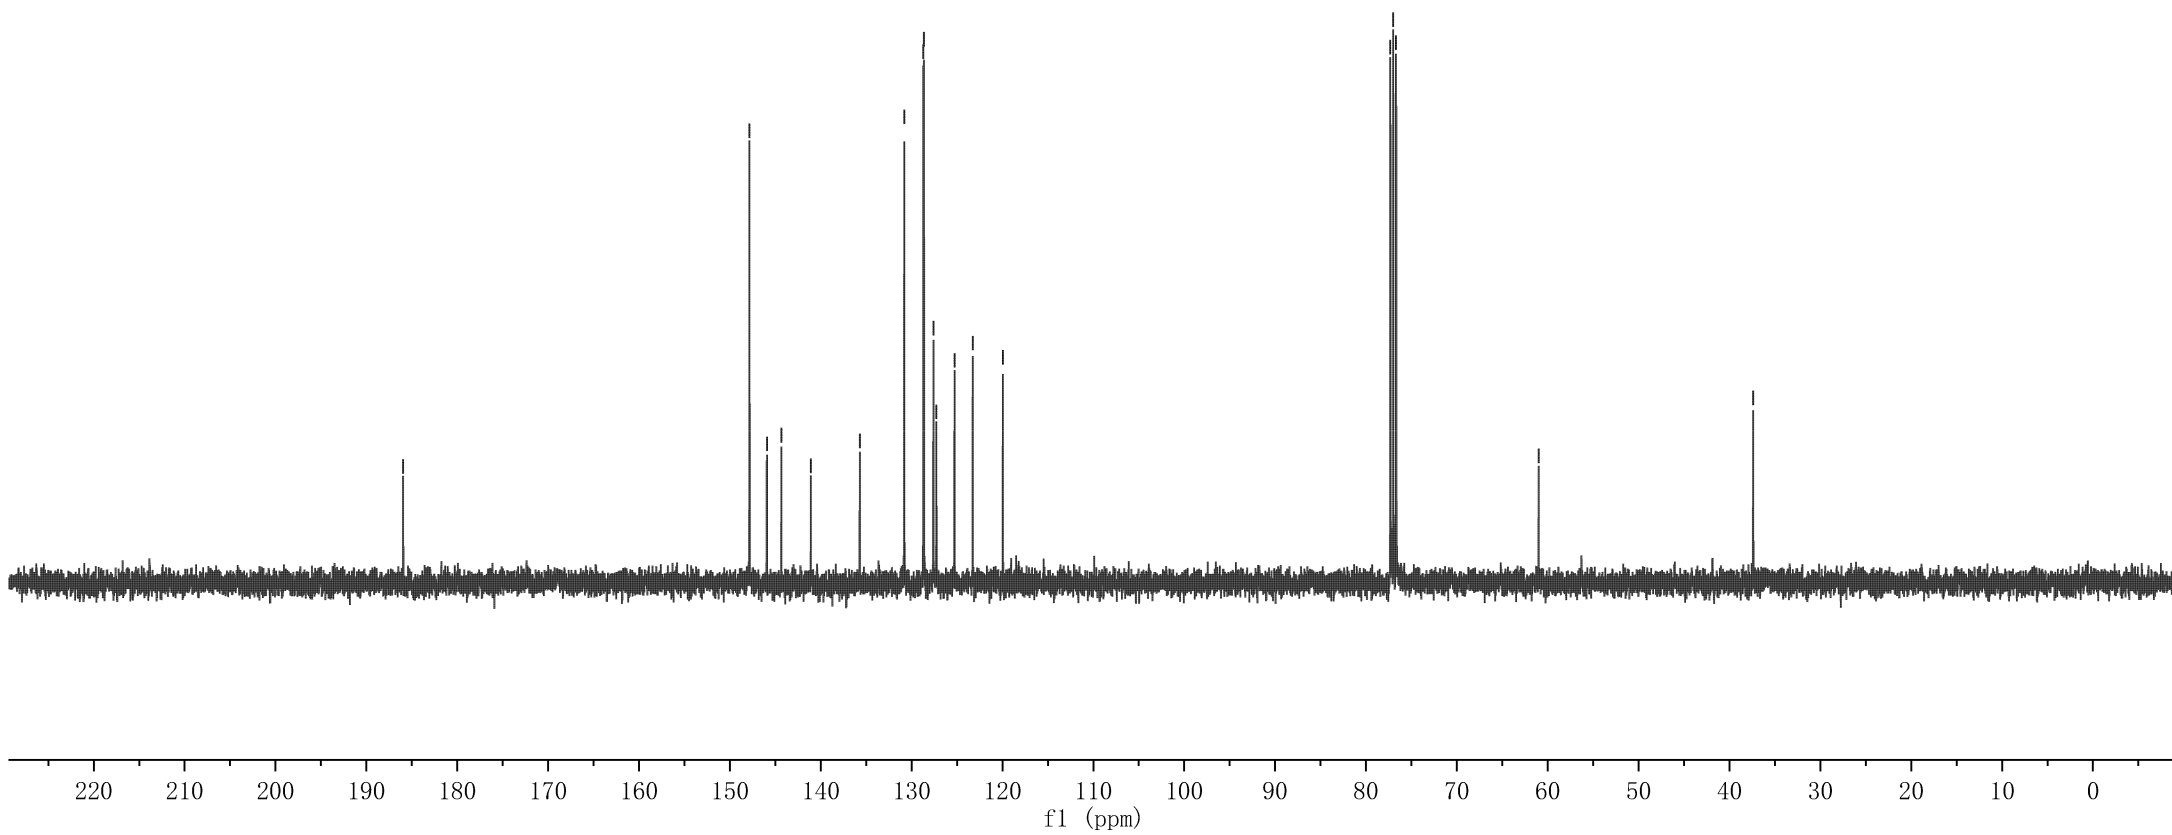

| Parameter                | Value                    |
|--------------------------|--------------------------|
| 1 Title                  | 3a-dept-fxy-2-140-a-DEPT |
| 2 Origin                 | Bruker BioSpin GmbH      |
| 3 Solvent                | CDC13                    |
| 4 Temperature            | 300.0                    |
| 5 Number of Scans        | 5                        |
| 6 Acquisition Time       | 1.3631                   |
| 7 Acquisition Date       | 2020-06-19T20:21:49      |
| 8 Spectrometer Frequency | 100.61                   |
| 9 Spectral Width         | 24038.5                  |

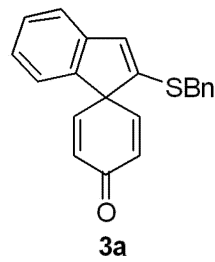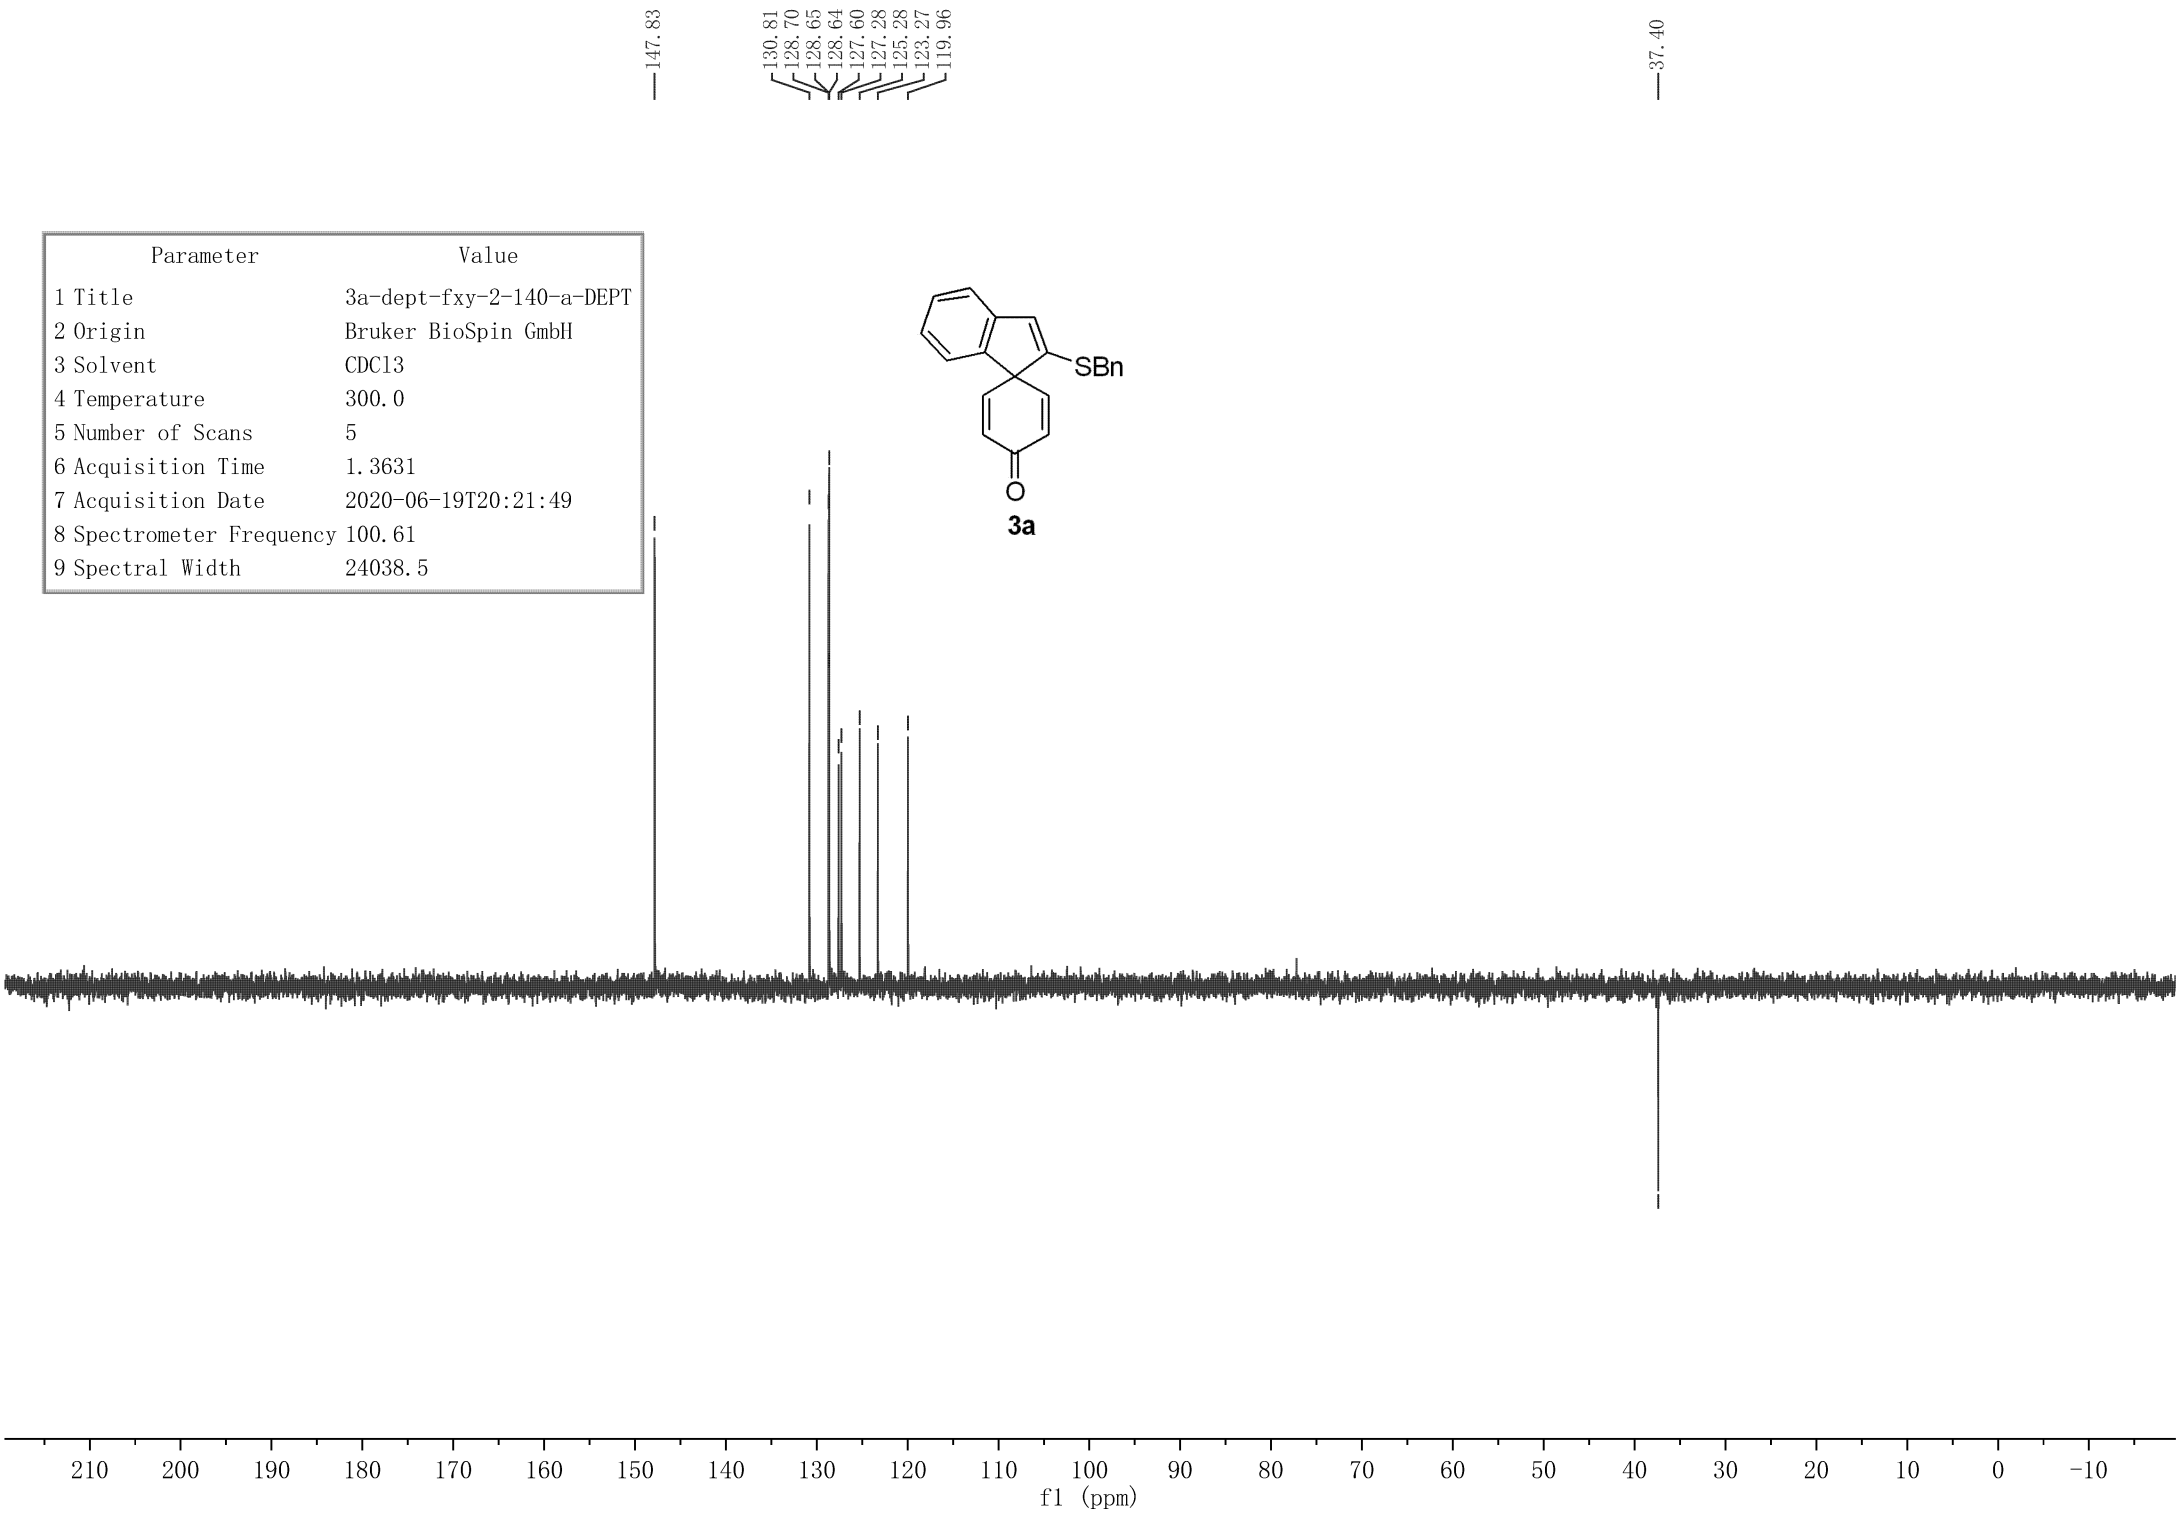

7.317  
7.299  
7.279  
7.251  
7.135  
7.116  
7.113  
7.095  
7.056  
7.037  
6.660  
6.528  
6.524  
6.503  
6.497  
6.405  
6.399  
6.374

2.986  
2.968  
2.949  
2.931

1.405  
1.386  
1.368

0.000

| Parameter                | Value                |
|--------------------------|----------------------|
| 1 Title                  | 3b-H-fxy-2-213       |
| 2 Origin                 | Bruker, BioSpin GmbH |
| 3 Solvent                | CDCl3                |
| 4 Temperature            | 298.0                |
| 5 Number of Scans        | 7                    |
| 6 Acquisition Time       | 4.0894               |
| 7 Acquisition Date       | 2020-07-15T14:26:36  |
| 8 Spectrometer Frequency | 400.13               |
| 9 Spectral Width         | 8012.8               |

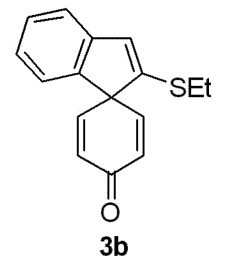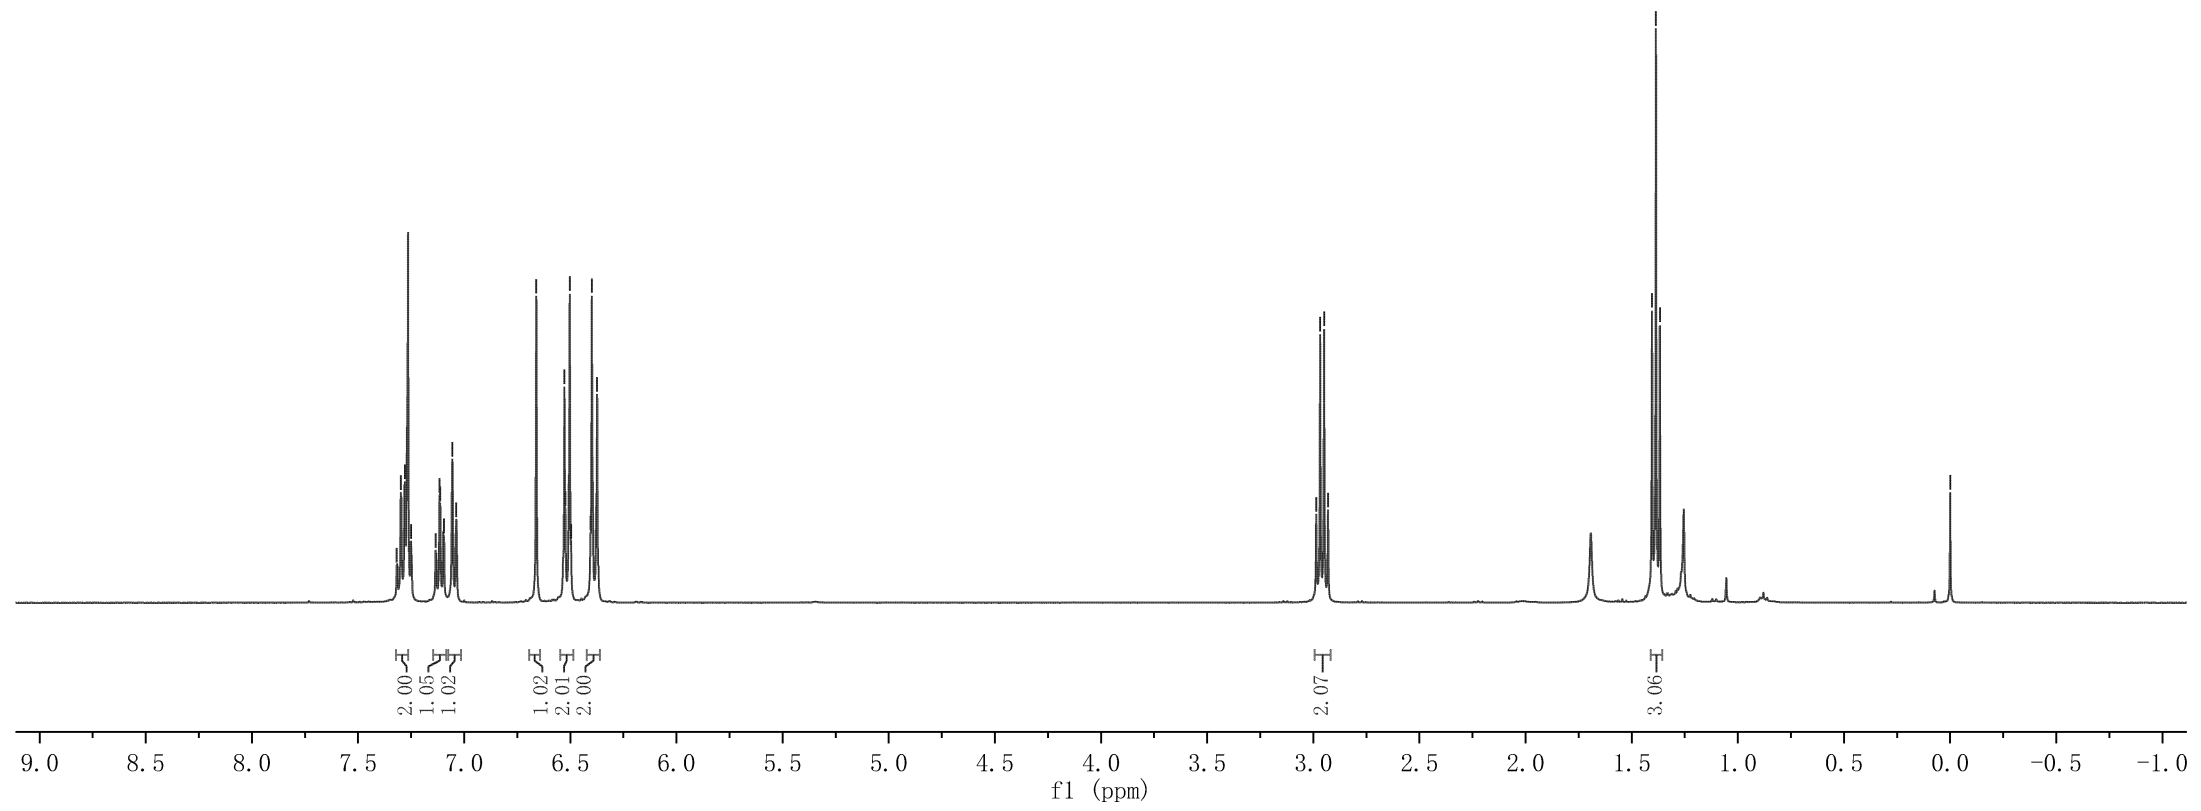

| Parameter                | Value               |
|--------------------------|---------------------|
| 1 Title                  | 3b-C-fxy-2-213-C    |
| 2 Origin                 | Bruker BioSpin GmbH |
| 3 Solvent                | CDC13               |
| 4 Temperature            | 300.0               |
| 5 Number of Scans        | 35                  |
| 6 Acquisition Time       | 1.3631              |
| 7 Acquisition Date       | 2020-07-15T14:28:34 |
| 8 Spectrometer Frequency | 100.61              |
| 9 Spectral Width         | 24038.5             |

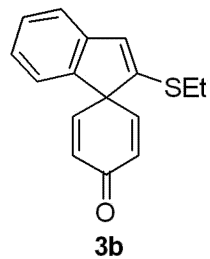

186.08

148.19  
146.64  
144.55  
140.98

130.70  
128.68  
125.61  
125.04  
123.28  
119.71

77.32  
77.00  
76.68

60.93

26.60

13.43

148.19  
146.64  
144.55

140.98

130.70

128.68

125.61

125.04

123.28

119.71

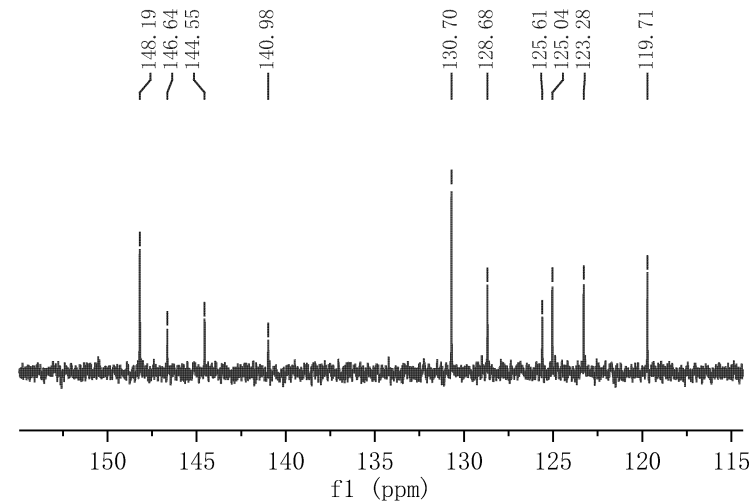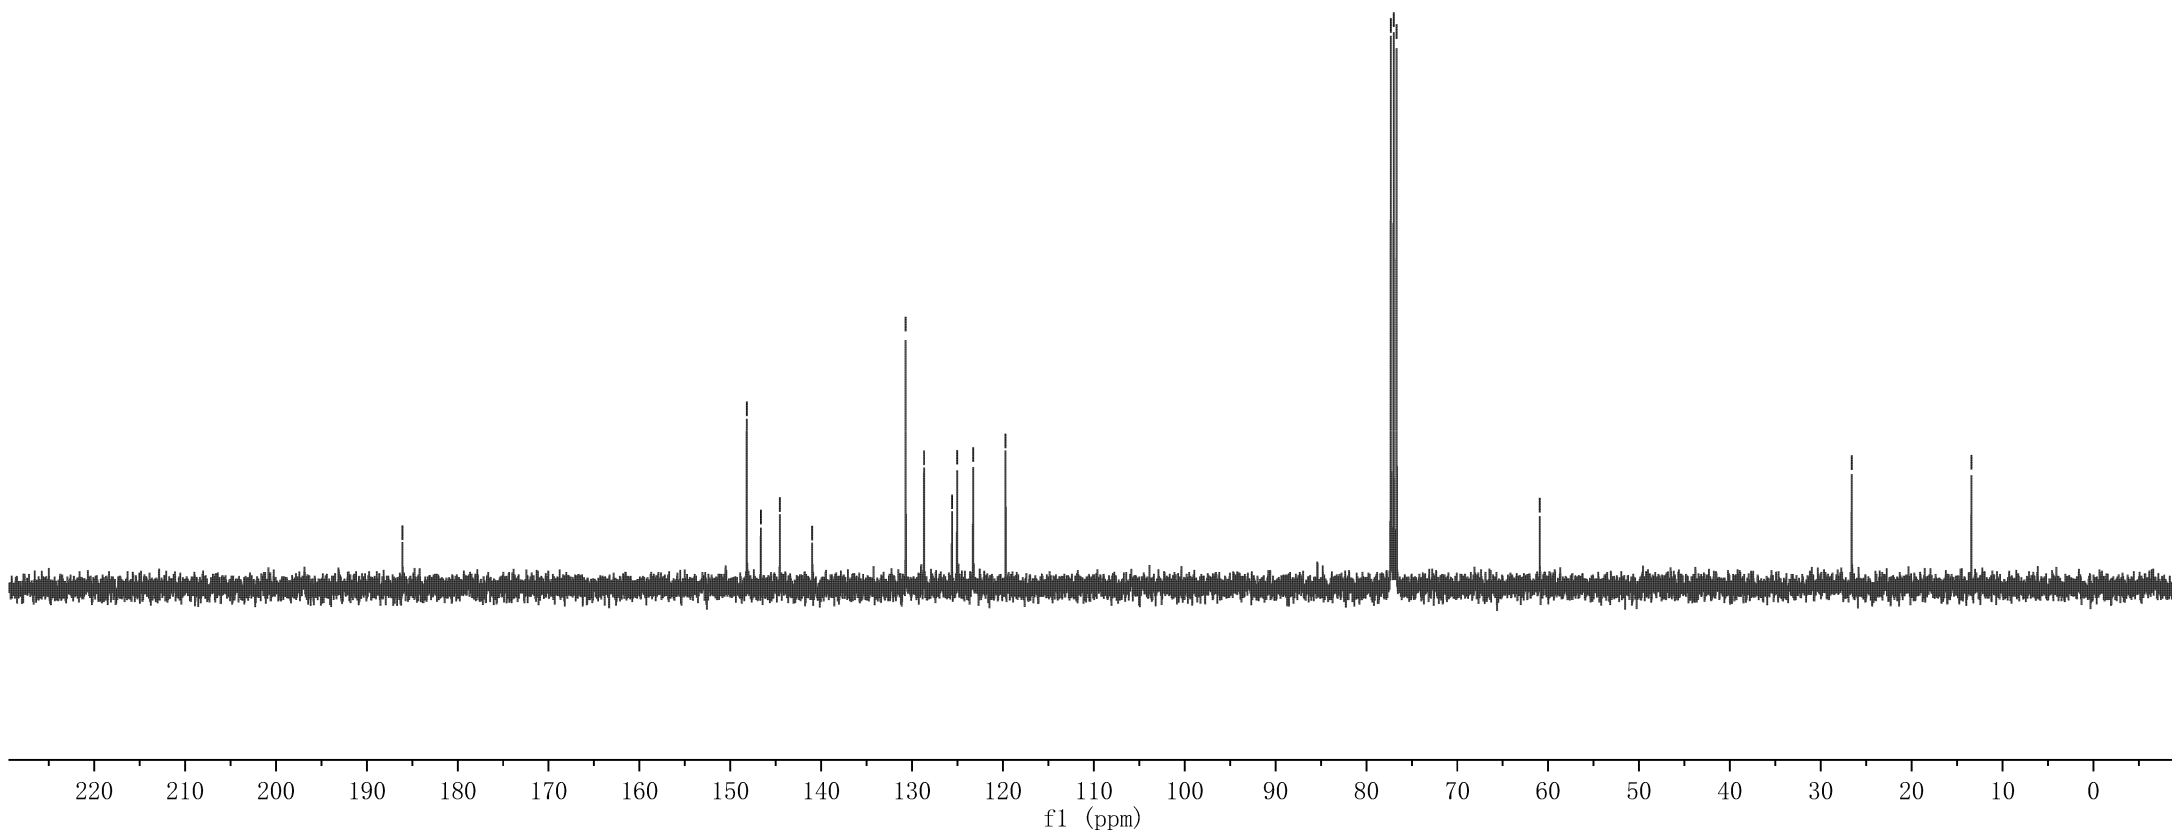

7.530  
7.525  
7.515  
7.506  
7.387  
7.377  
7.361  
7.351  
7.297  
7.295  
7.279  
7.276  
7.215  
7.197  
7.155  
7.136  
7.133  
7.115  
7.051  
7.032  
6.609  
6.475  
6.469  
6.443  
6.437  
6.383  
6.377  
6.352  
6.346

| Parameter                | Value               |
|--------------------------|---------------------|
| 1 Title                  | 3c-H-fxy-3-52       |
| 2 Origin                 | Bruker BioSpin GmbH |
| 3 Solvent                | CDCl3               |
| 4 Temperature            | 298.0               |
| 5 Number of Scans        | 4                   |
| 6 Acquisition Time       | 4.0894              |
| 7 Acquisition Date       | 2021-05-25T16:50:53 |
| 8 Spectrometer Frequency | 400.13              |
| 9 Spectral Width         | 8012.8              |

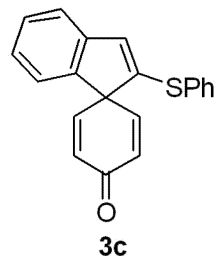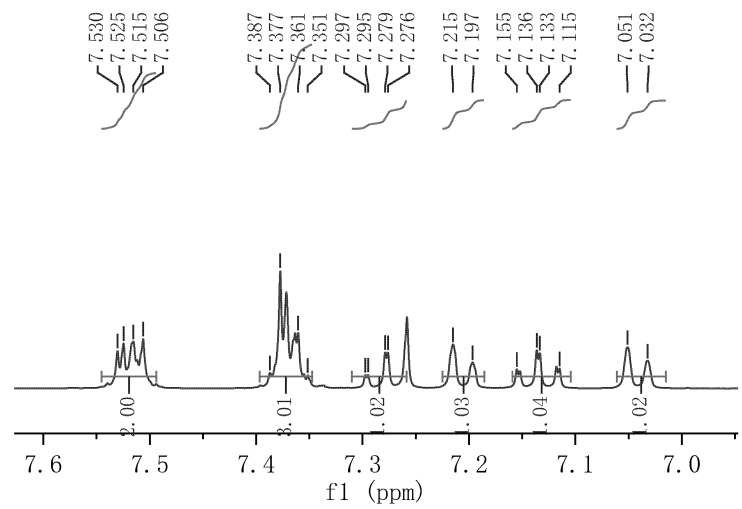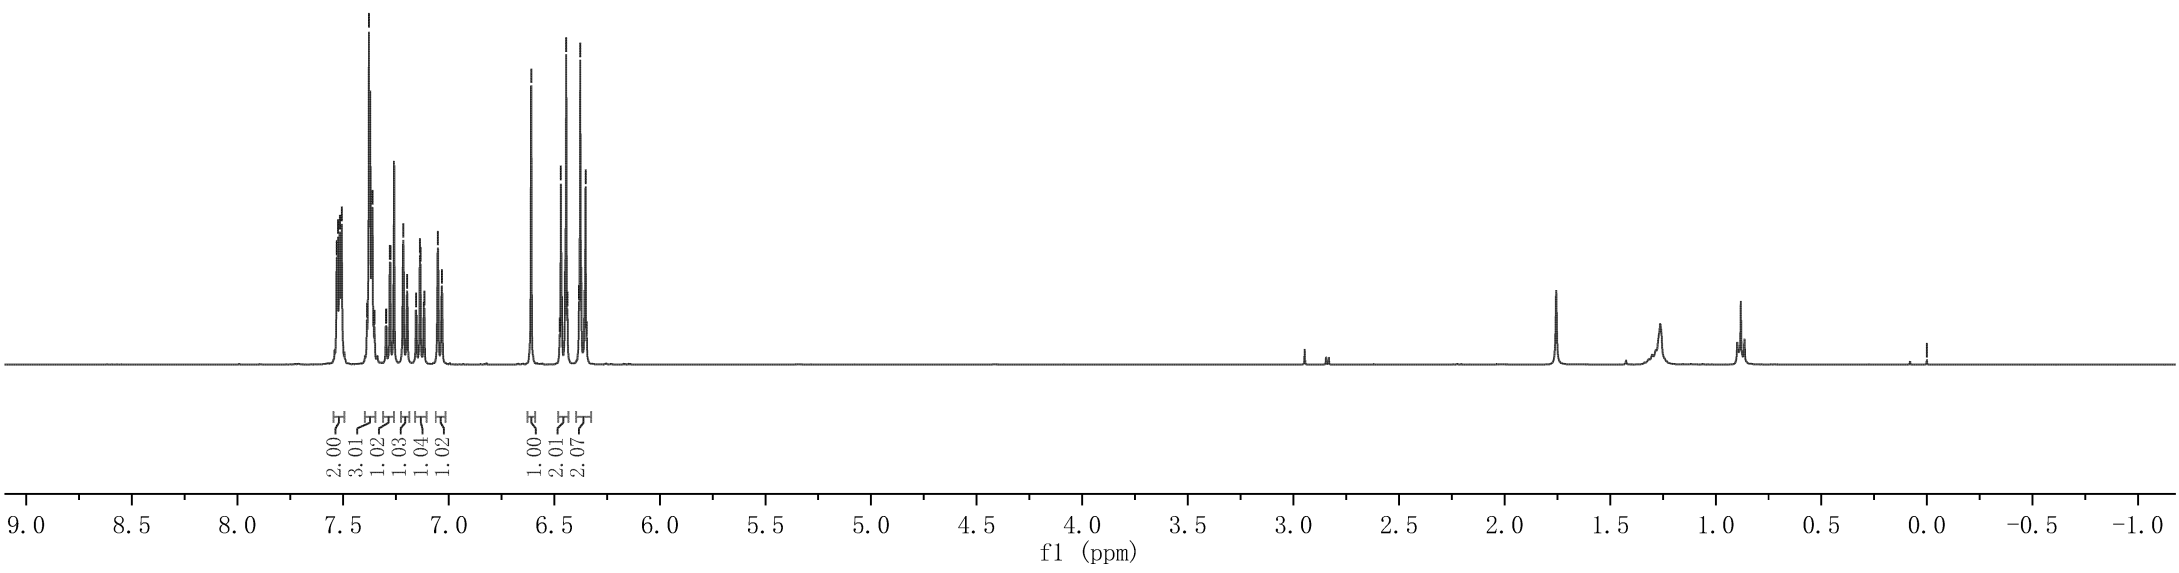

| Parameter                | Value               |
|--------------------------|---------------------|
| 1 Title                  | 3c-C-fxy-3-52-Cc    |
| 2 Origin                 | Bruker BioSpin GmbH |
| 3 Solvent                | CDC13               |
| 4 Temperature            | 300.0               |
| 5 Number of Scans        | 18                  |
| 6 Acquisition Time       | 1.3631              |
| 7 Acquisition Date       | 2021-05-25T16:51:52 |
| 8 Spectrometer Frequency | 100.61              |
| 9 Spectral Width         | 24038.5             |

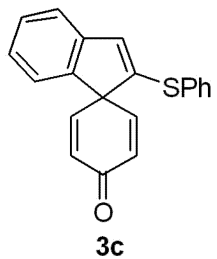

186.03

147.61  
146.04  
143.81  
141.88  
133.96  
131.40  
130.88  
130.74  
129.41  
128.94  
128.68  
125.72  
123.39  
120.49

77.32  
77.00  
76.68

61.01

147.61  
146.04  
143.81  
141.88

133.96  
131.40  
130.88  
130.74  
129.41  
128.94  
128.68  
125.72  
123.39  
120.49

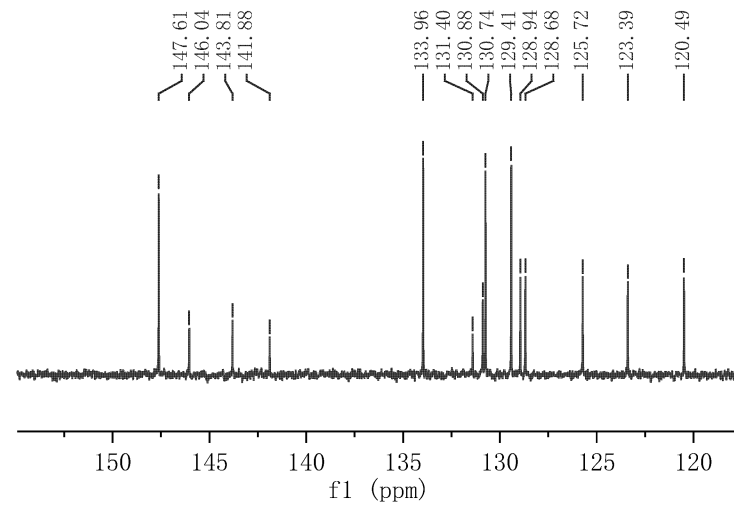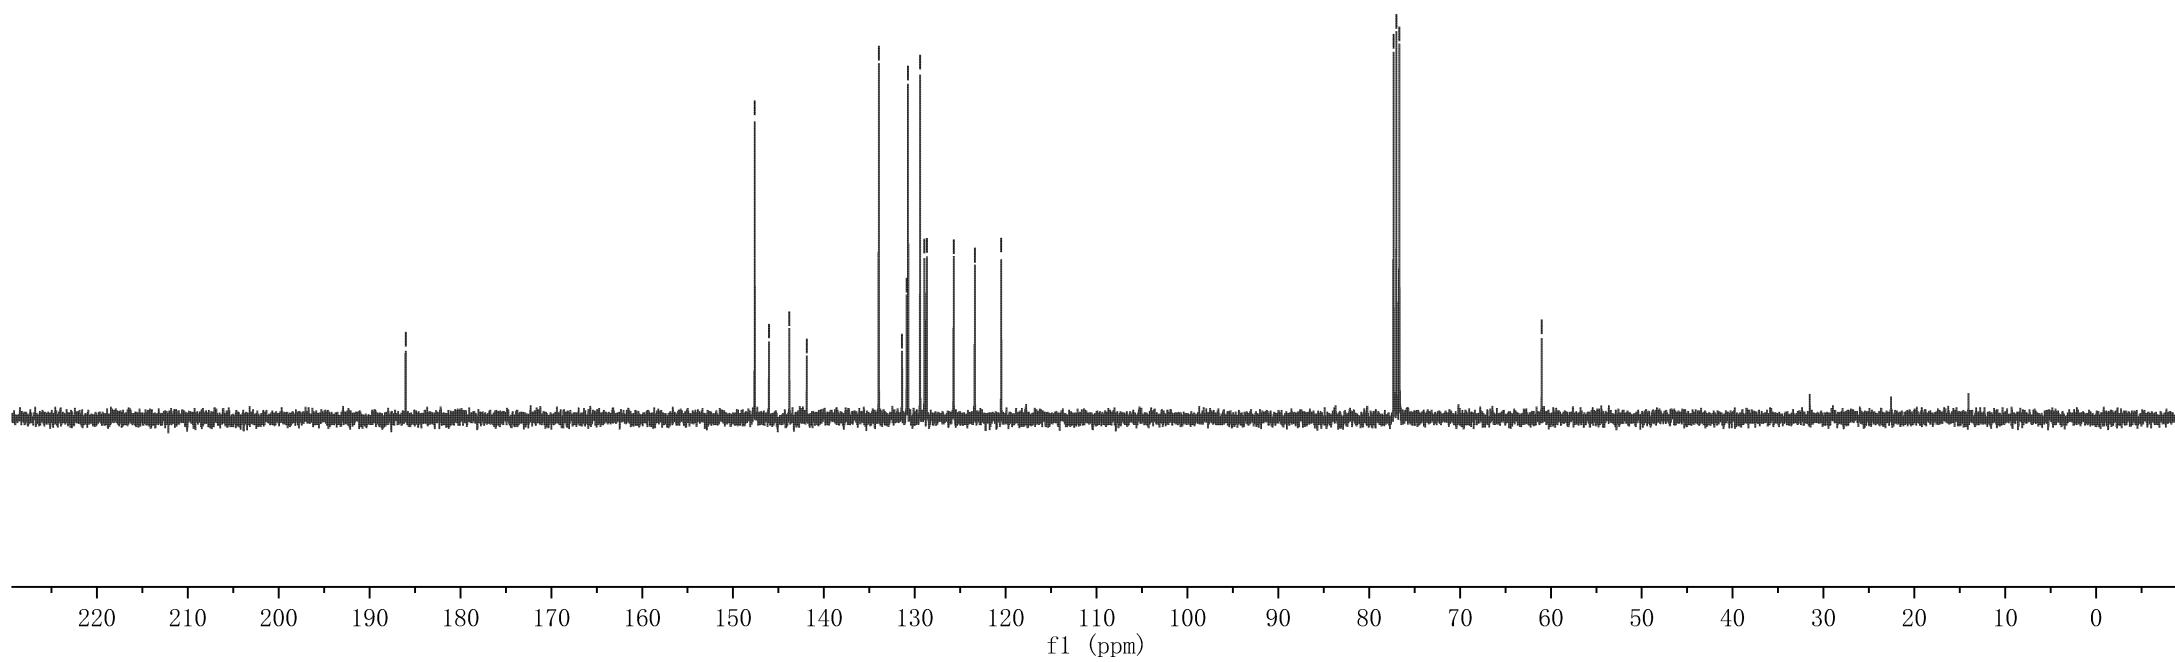

| Parameter                | Value               |
|--------------------------|---------------------|
| 1 Title                  | 3d-H-fxy-2-212-H    |
| 2 Origin                 | Bruker BioSpin GmbH |
| 3 Solvent                | CDCl <sub>3</sub>   |
| 4 Temperature            | 298.0               |
| 5 Number of Scans        | 6                   |
| 6 Acquisition Time       | 4.0894              |
| 7 Acquisition Date       | 2021-05-19T16:08:40 |
| 8 Spectrometer Frequency | 400.13              |
| 9 Spectral Width         | 8012.8              |

7.364  
7.346  
7.312  
7.257  
7.066  
6.950  
6.929  
6.924  
6.905  
6.661  
6.486  
6.461  
6.330  
6.305

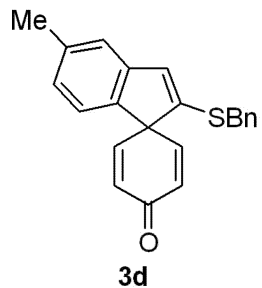

4.119

2.357

0.000

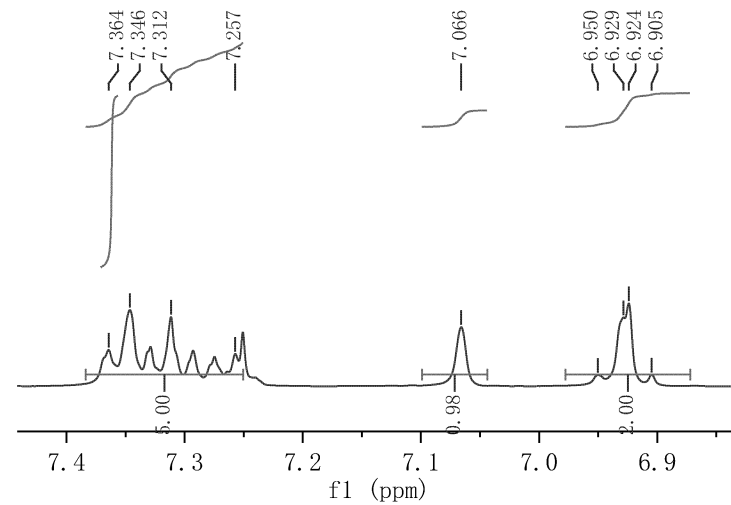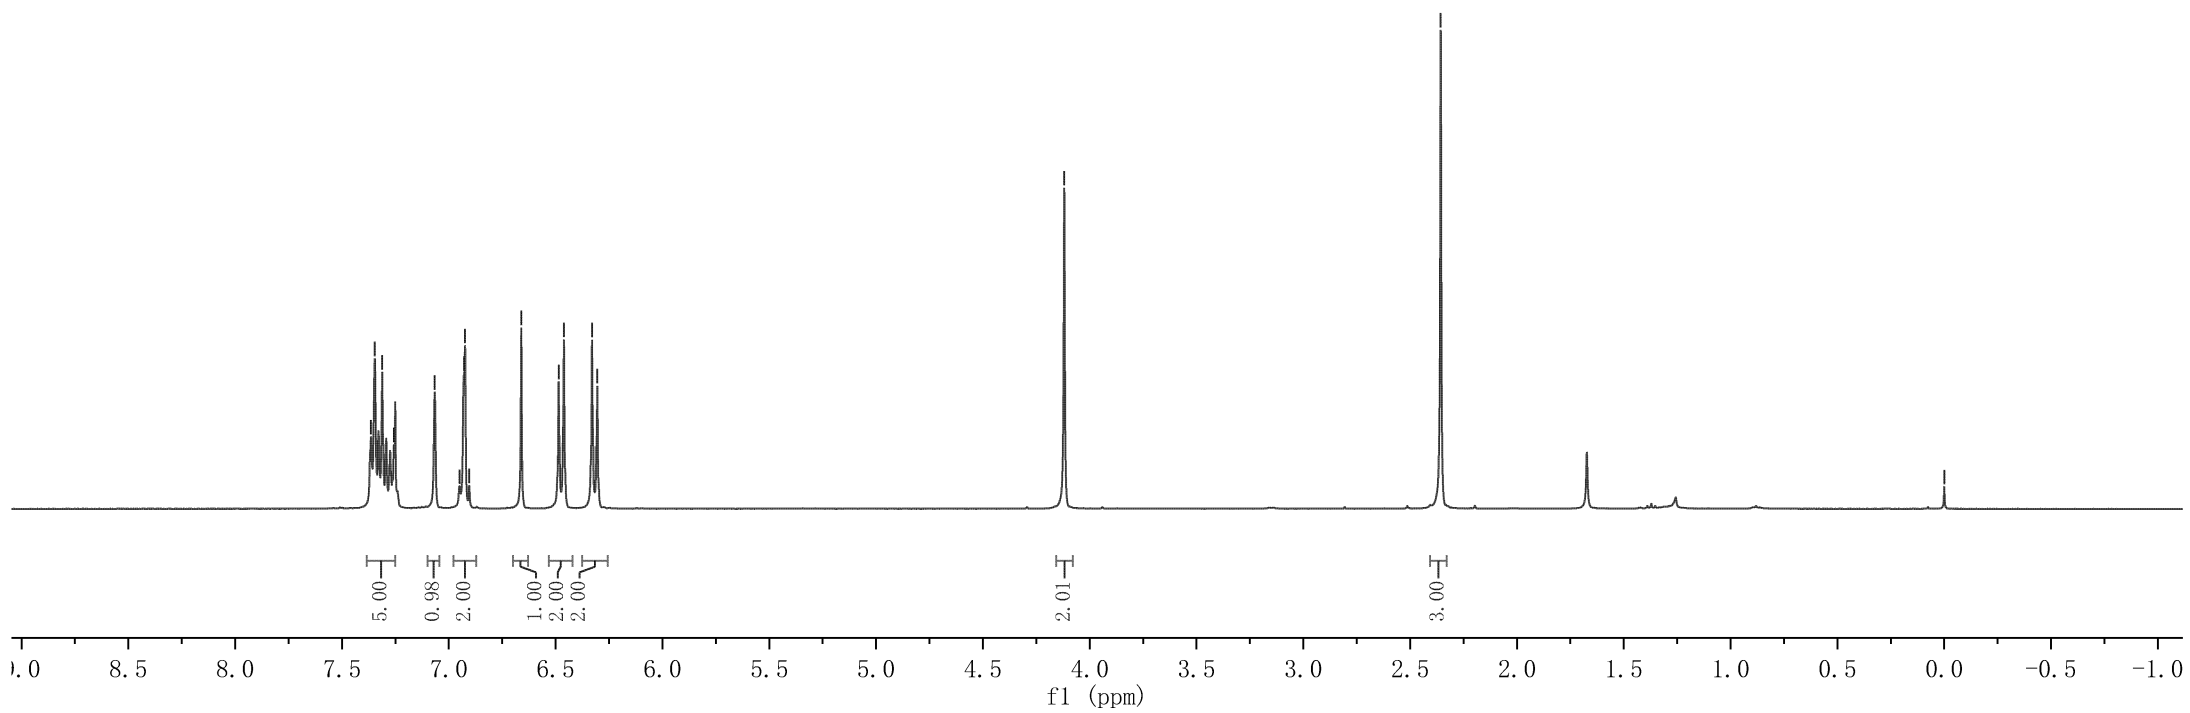



| Parameter                | Value               |
|--------------------------|---------------------|
| 1 Title                  | 3d-C-fxy-2-212-C    |
| 2 Origin                 | Bruker BioSpin GmbH |
| 3 Solvent                | CDC13               |
| 4 Temperature            | 300.0               |
| 5 Number of Scans        | 15                  |
| 6 Acquisition Time       | 1.3631              |
| 7 Acquisition Date       | 2021-05-19T16:09:49 |
| 8 Spectrometer Frequency | 100.61              |
| 9 Spectral Width         | 24038.5             |



186.06

148.12  
145.85  
144.53  
138.70  
138.14  
135.82  
130.66  
128.74  
128.65  
127.60  
126.10  
123.01  
120.78

77.32  
77.00  
76.68

60.76

37.47

21.45

148.12  
145.85  
144.53

138.70  
138.14  
135.82

130.66  
128.74  
128.65  
127.60  
126.10

123.01  
120.78

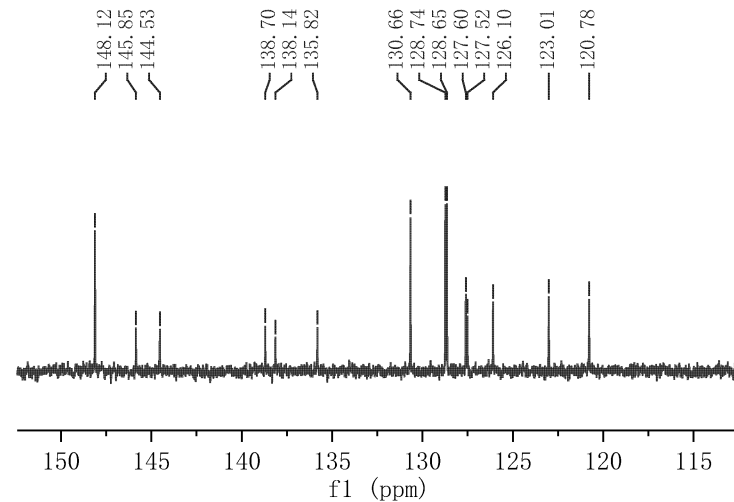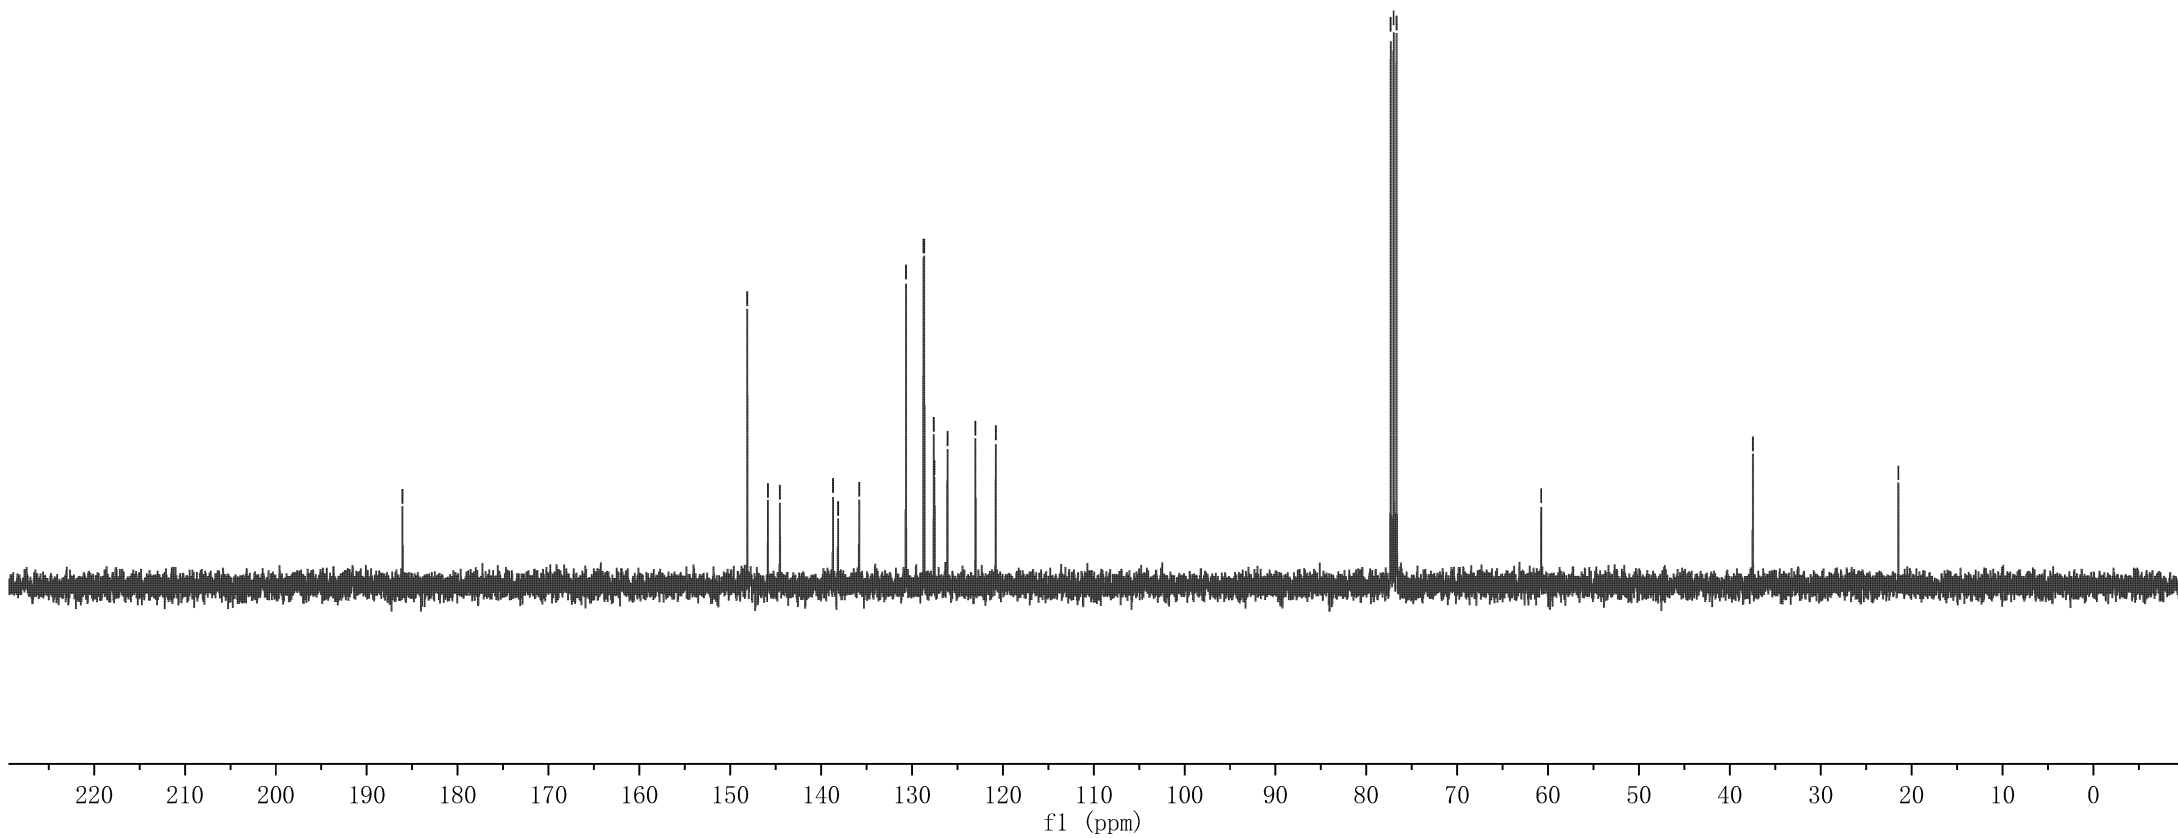

| Parameter                | Value               |
|--------------------------|---------------------|
| 1 Title                  | 3e-H-fxy-3-94-H     |
| 2 Origin                 | Bruker BioSpin GmbH |
| 3 Solvent                | CDC13               |
| 4 Temperature            | 298.0               |
| 5 Number of Scans        | 12                  |
| 6 Acquisition Time       | 4.0894              |
| 7 Acquisition Date       | 2021-05-25T16:35:28 |
| 8 Spectrometer Frequency | 400.13              |
| 9 Spectral Width         | 8012.8              |

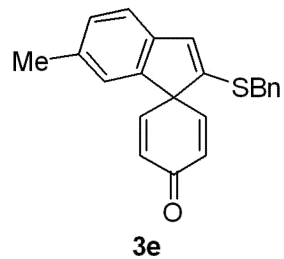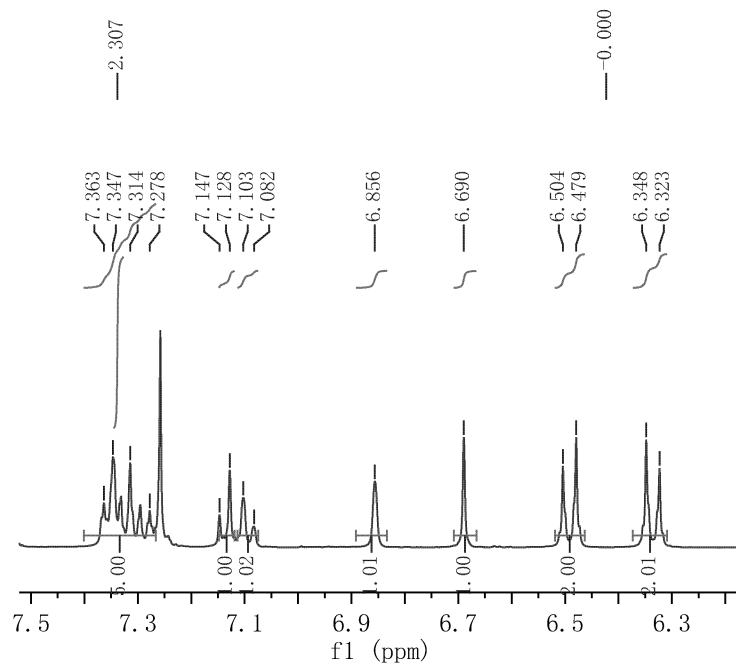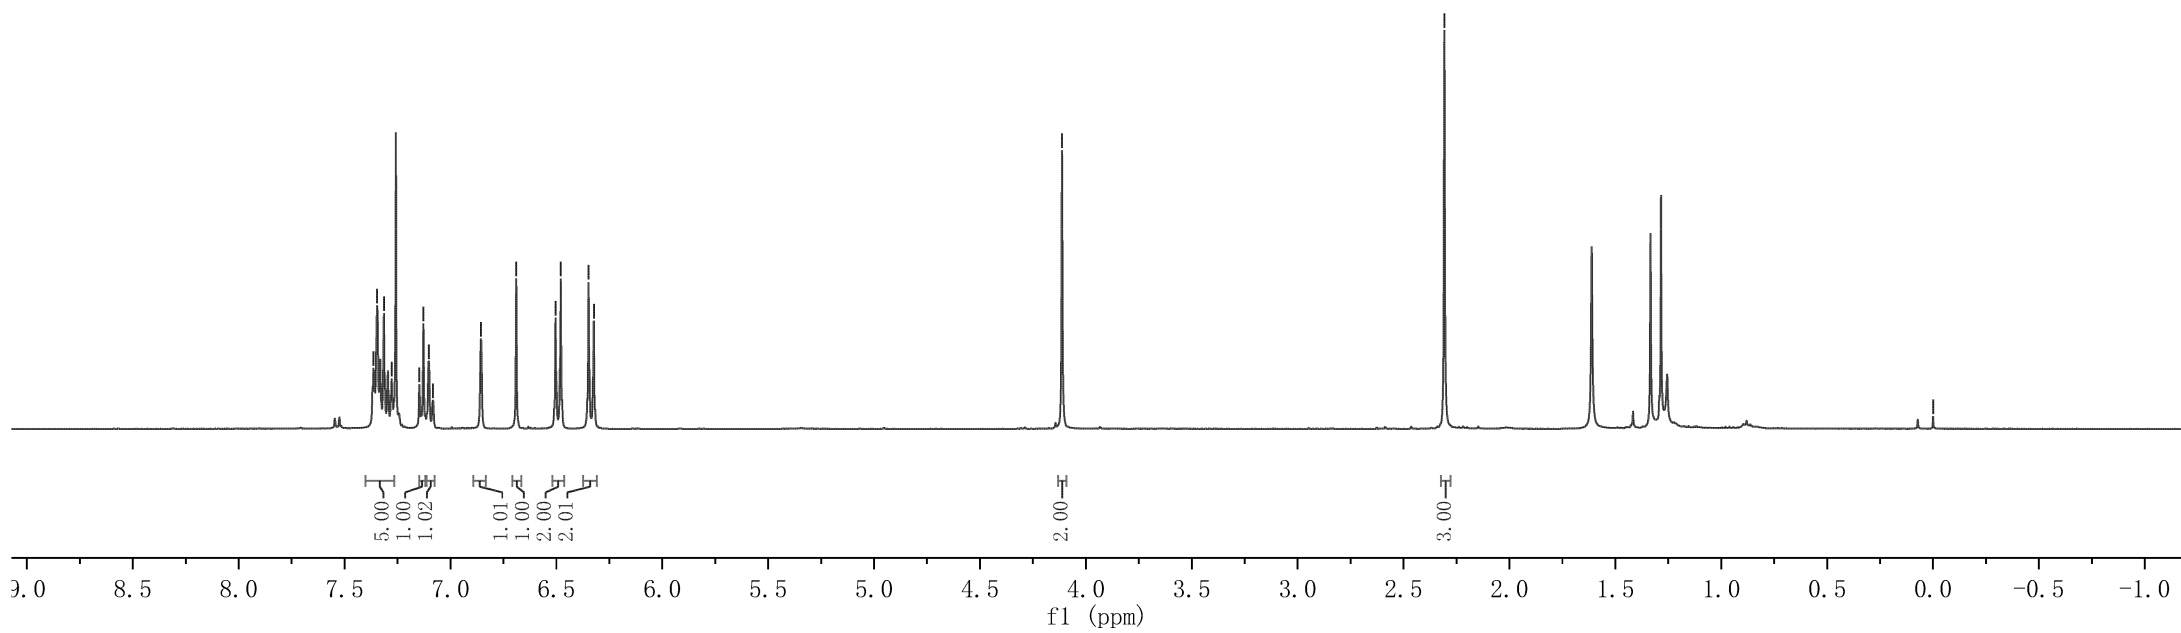

| Parameter                | Value               |
|--------------------------|---------------------|
| 1 Title                  | 3e-C-fxy-3-94-C     |
| 2 Origin                 | Bruker BioSpin GmbH |
| 3 Solvent                | CDC13               |
| 4 Temperature            | 300.0               |
| 5 Number of Scans        | 199                 |
| 6 Acquisition Time       | 1.3631              |
| 7 Acquisition Date       | 2021-05-25T16:37:11 |
| 8 Spectrometer Frequency | 100.61              |
| 9 Spectral Width         | 24038.5             |

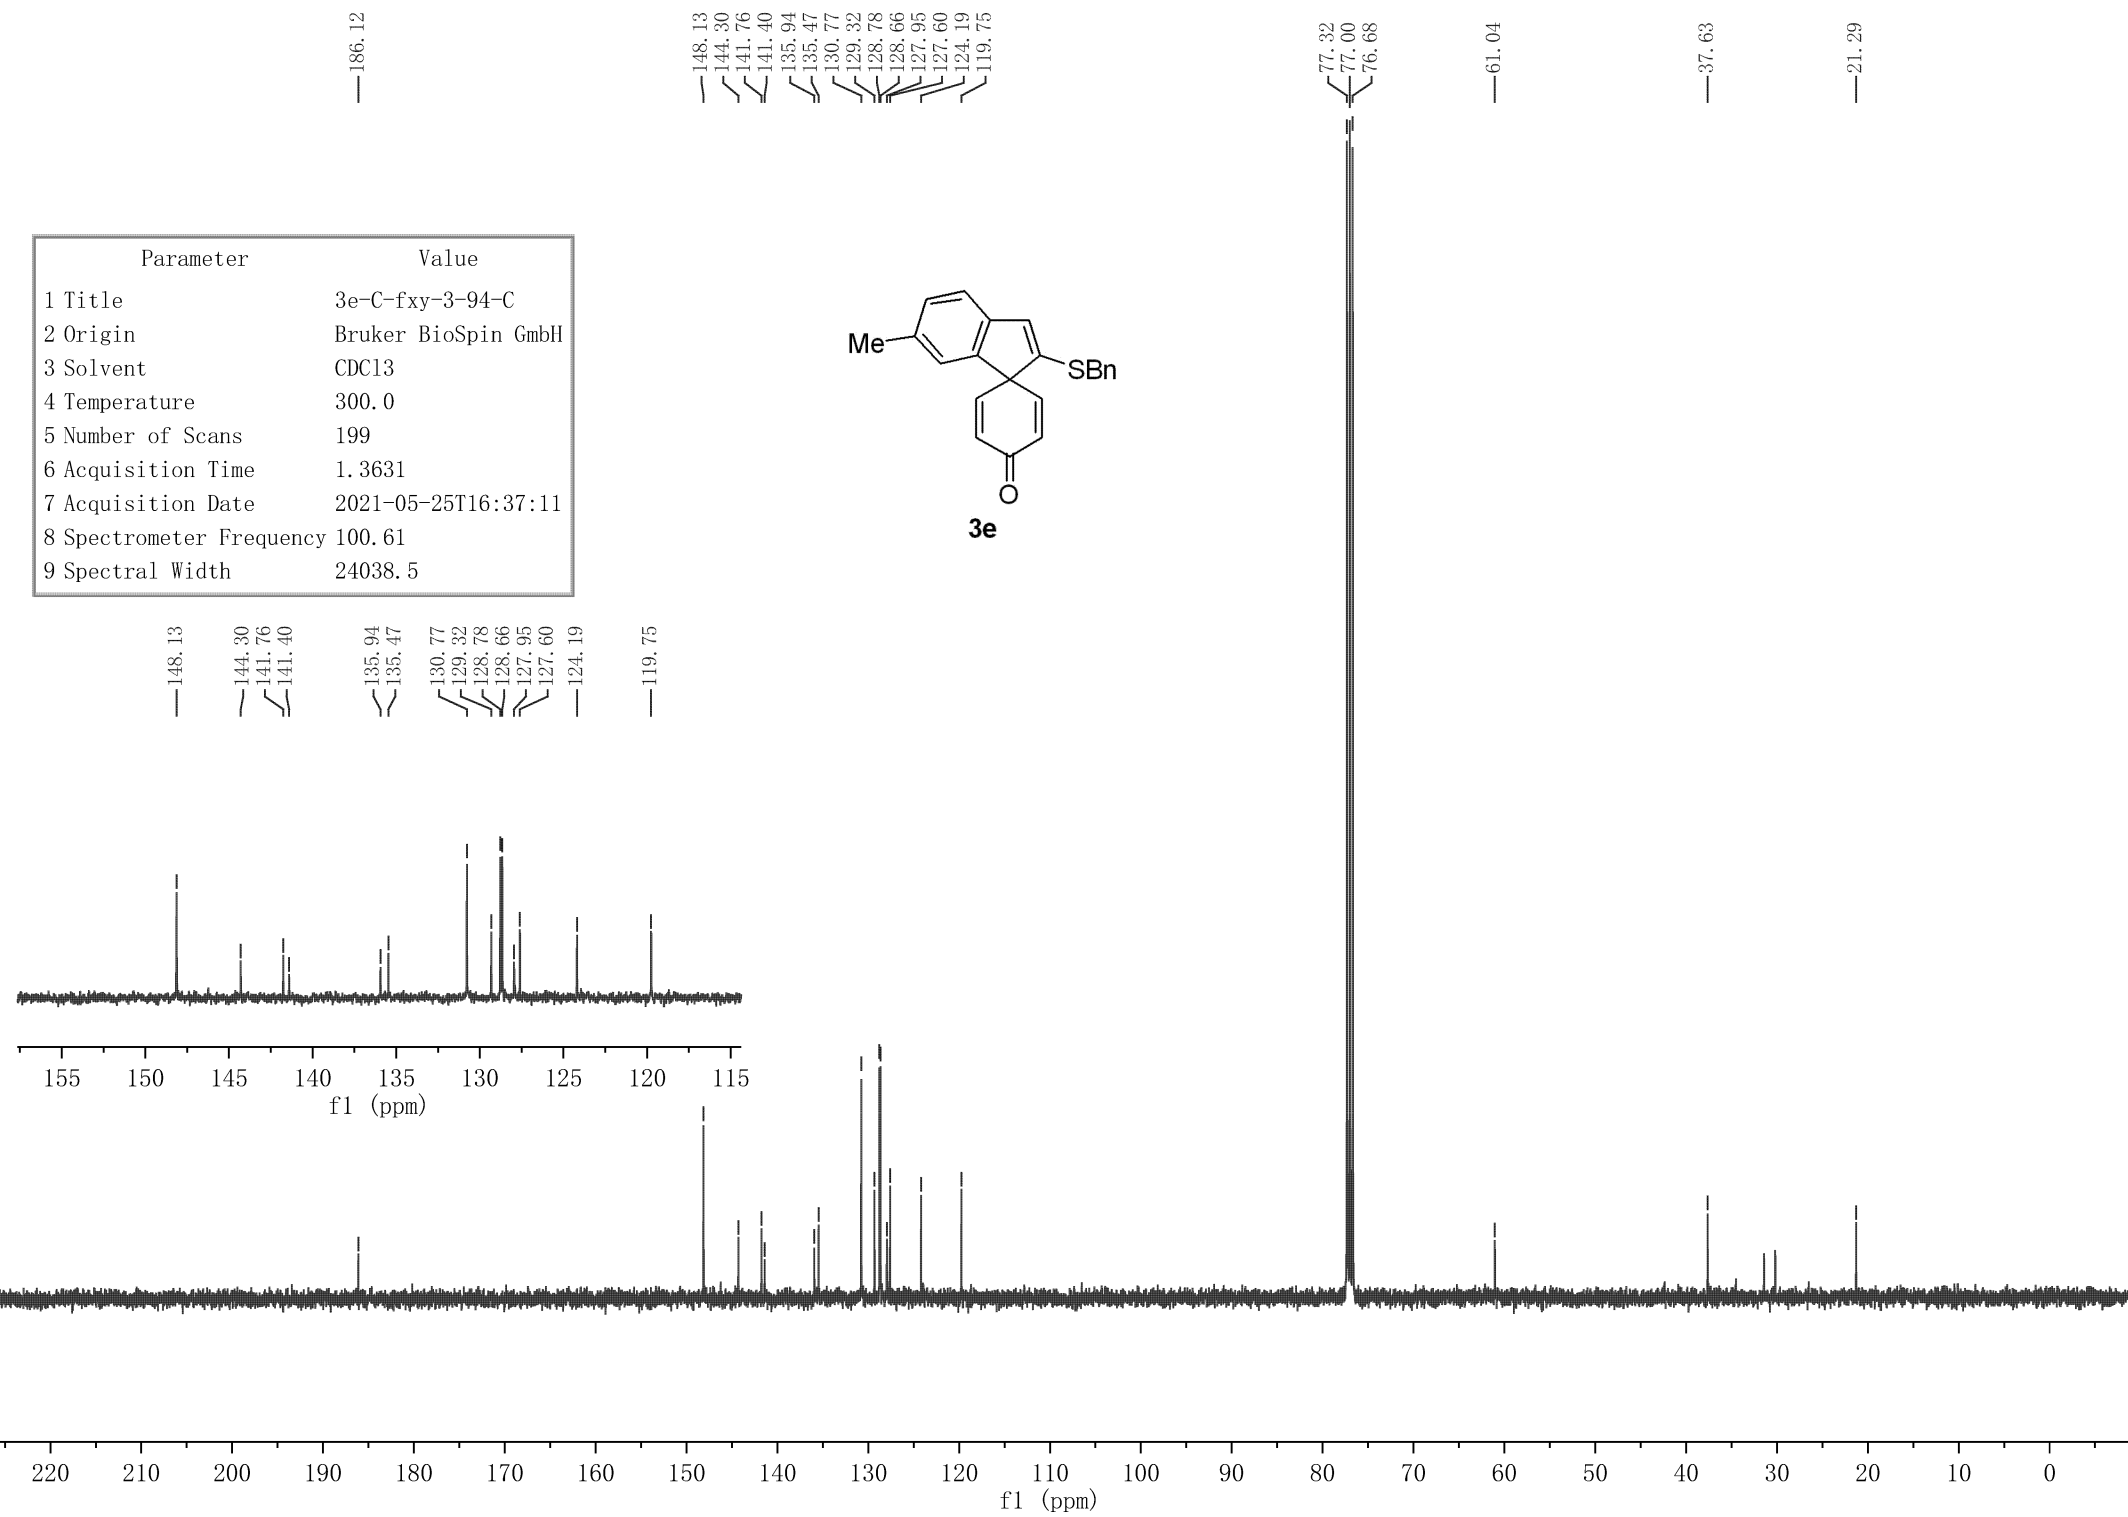

| Parameter                | Value               |
|--------------------------|---------------------|
| 1 Title                  | 3f-H-fxy-2-230-H    |
| 2 Origin                 | Bruker BioSpin GmbH |
| 3 Solvent                | CDC13               |
| 4 Temperature            | 298.0               |
| 5 Number of Scans        | 7                   |
| 6 Acquisition Time       | 4.0894              |
| 7 Acquisition Date       | 2021-05-19T16:14:15 |
| 8 Spectrometer Frequency | 400.13              |
| 9 Spectral Width         | 8012.8              |

7.321  
7.293  
7.275  
7.240  
7.158  
7.138  
6.836  
6.817  
6.678  
6.612  
6.490  
6.466  
6.322  
6.298

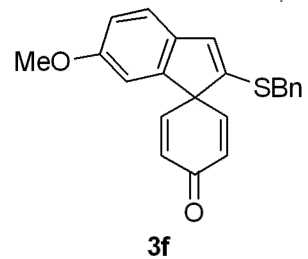

4.065  
3.731

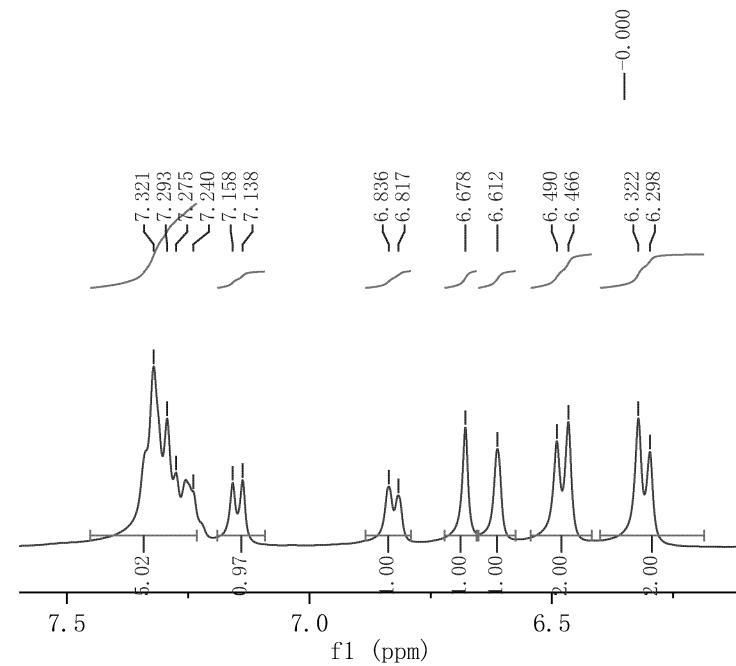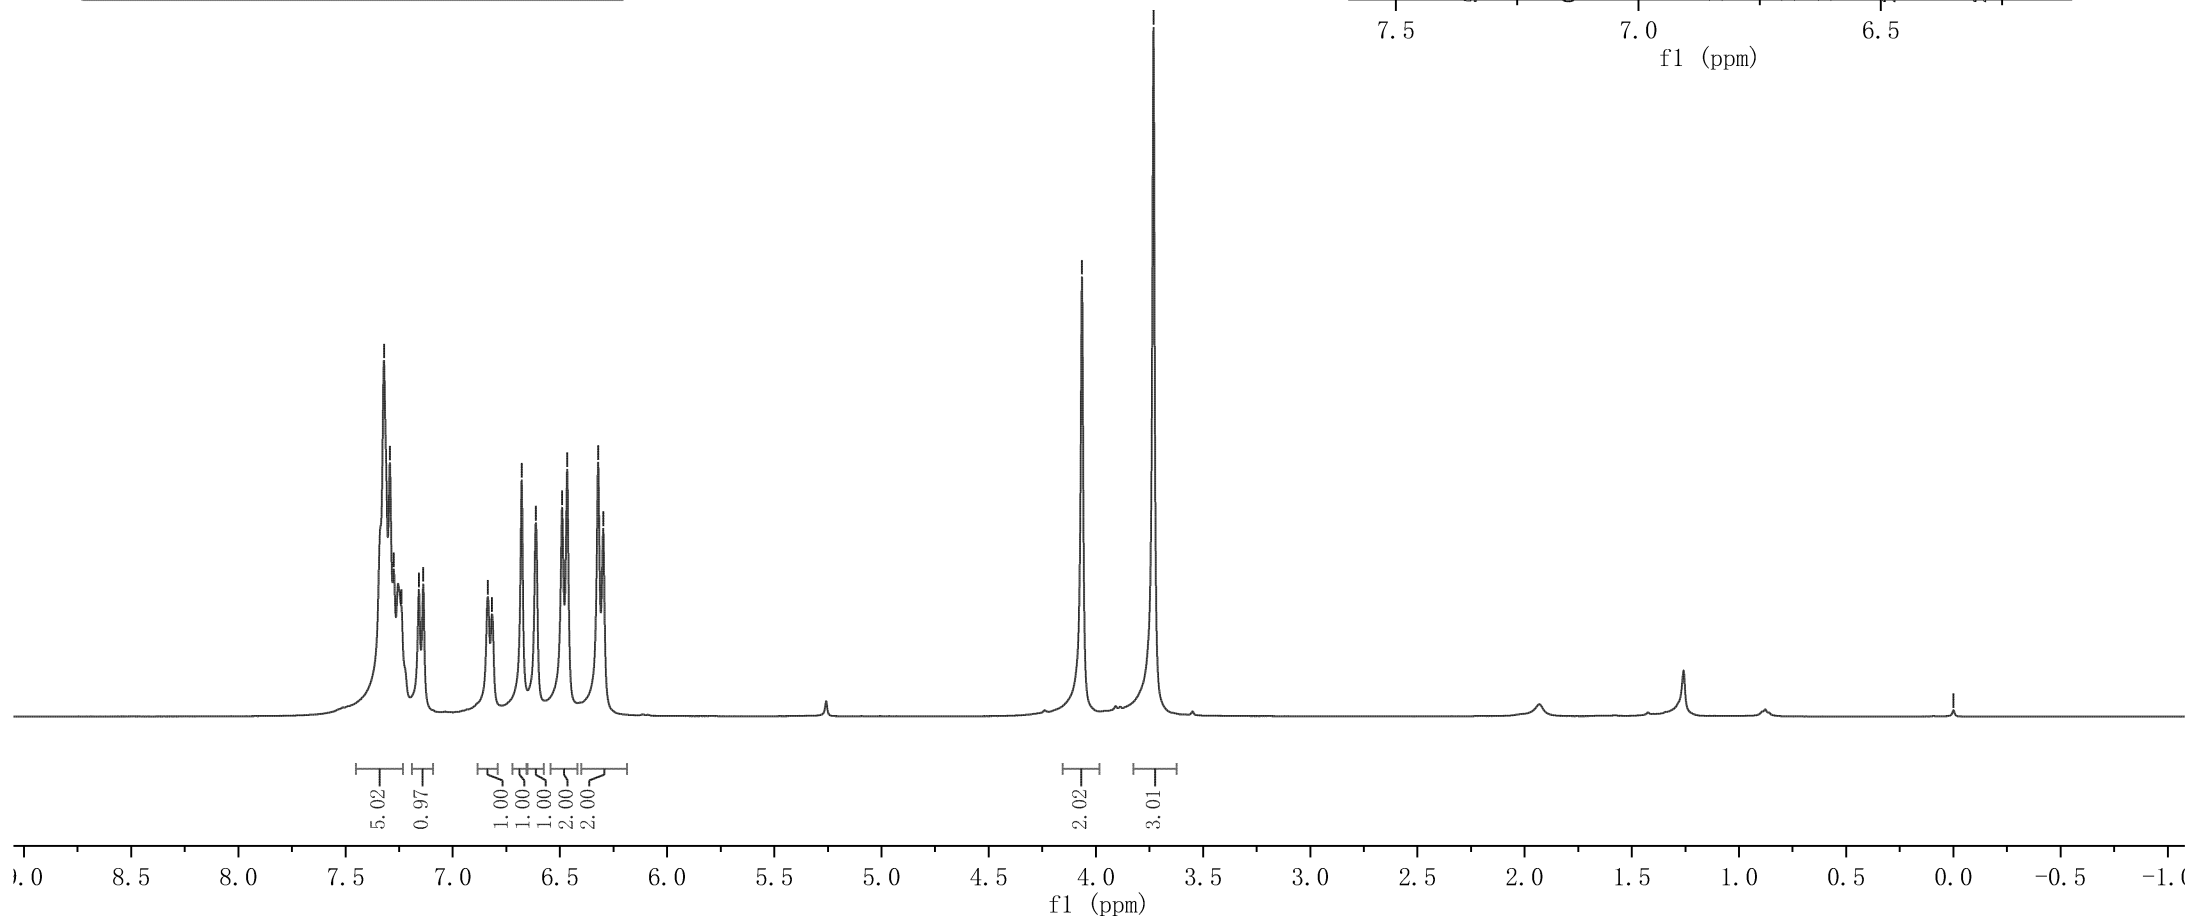

| Parameter                | Value               |
|--------------------------|---------------------|
| 1 Title                  | 3f-C-fxy-2-230-C    |
| 2 Origin                 | Bruker BioSpin GmbH |
| 3 Solvent                | CDC13               |
| 4 Temperature            | 300.0               |
| 5 Number of Scans        | 9                   |
| 6 Acquisition Time       | 1.3631              |
| 7 Acquisition Date       | 2021-05-19T16:15:21 |
| 8 Spectrometer Frequency | 100.62              |
| 9 Spectral Width         | 24038.5             |

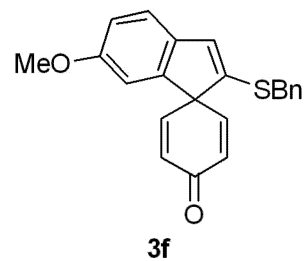

185.90  
158.28  
147.86  
143.07  
141.95  
137.16  
135.99  
130.71  
128.67  
128.49  
127.42  
120.57  
114.21  
109.59

77.32  
77.00  
76.68  
61.12  
55.47  
37.77

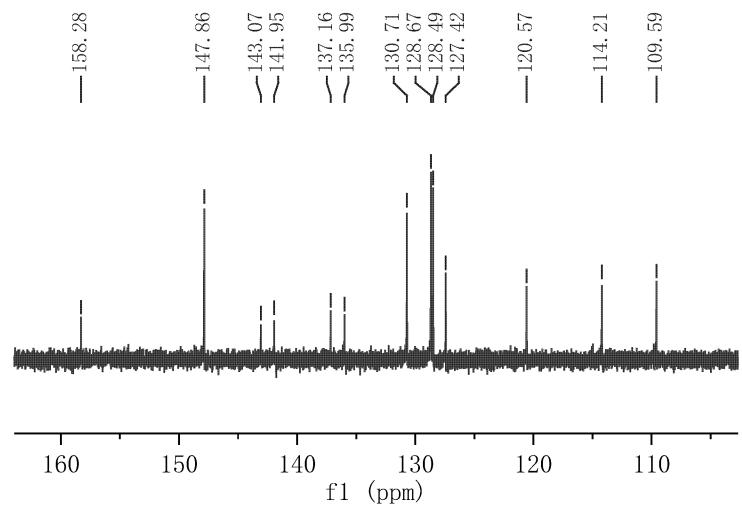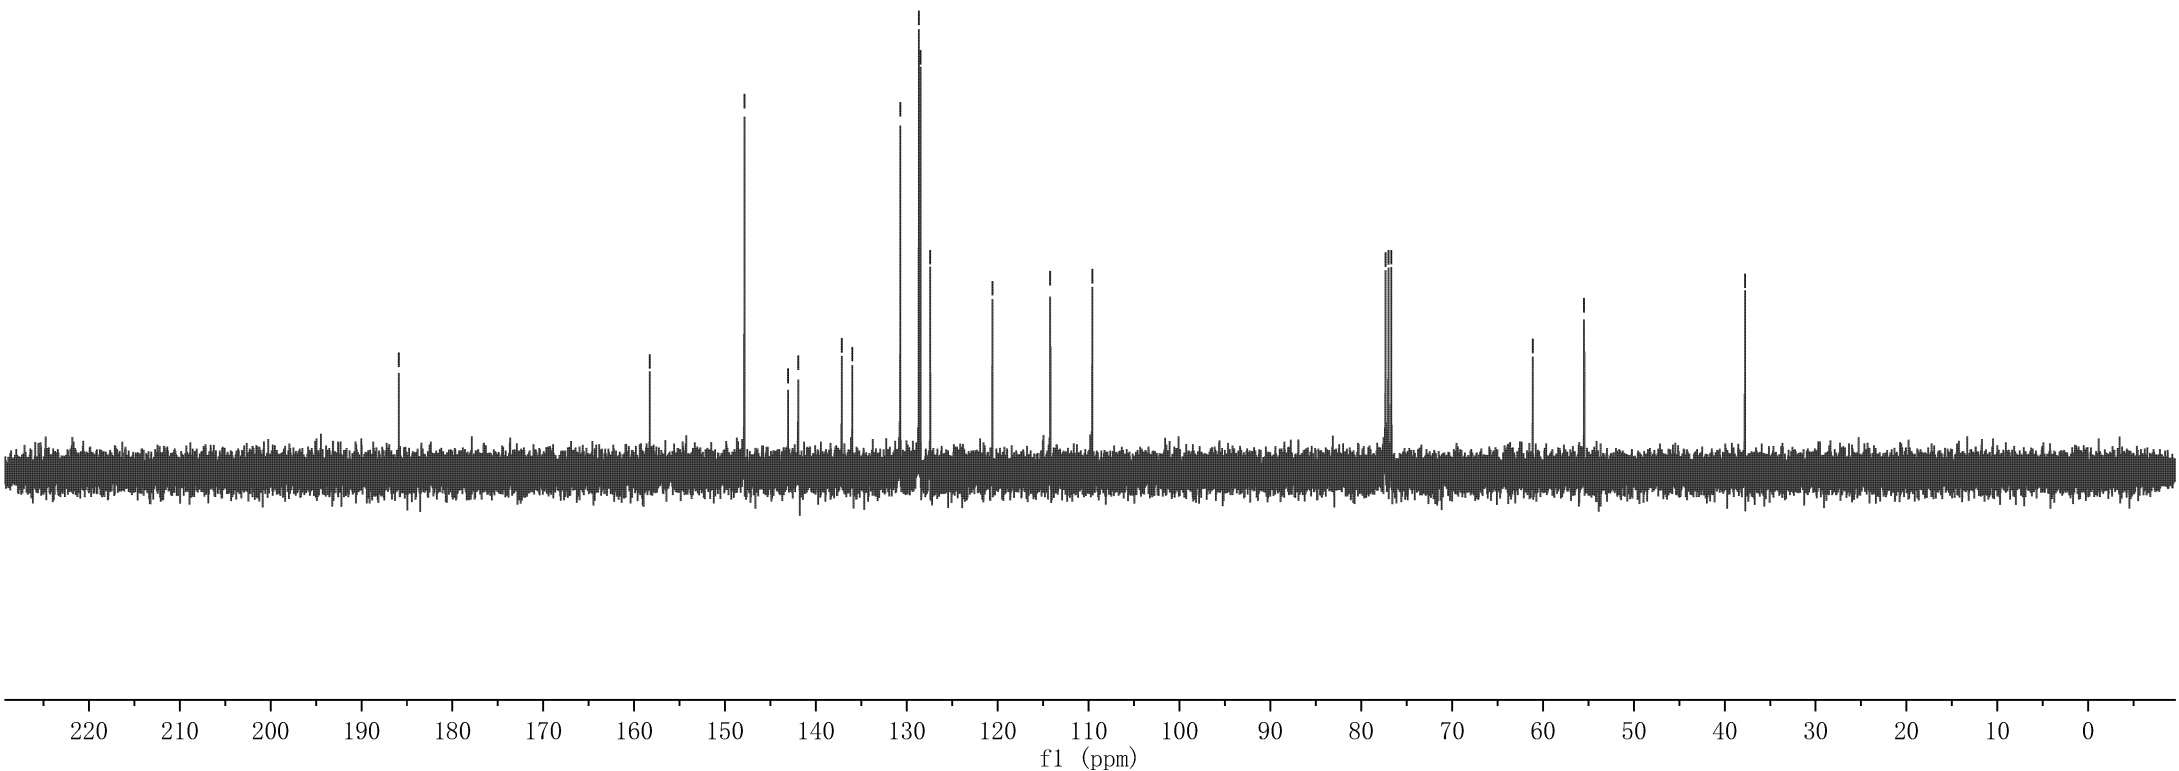

| Parameter                | Value               |
|--------------------------|---------------------|
| 1 Title                  | 3g-H-FXY-3-26-H     |
| 2 Origin                 | Bruker BioSpin GmbH |
| 3 Solvent                | CDC13               |
| 4 Temperature            | 298.0               |
| 5 Number of Scans        | 7                   |
| 6 Acquisition Time       | 4.0894              |
| 7 Acquisition Date       | 2020-08-05T14:12:20 |
| 8 Spectrometer Frequency | 400.13              |
| 9 Spectral Width         | 8012.8              |

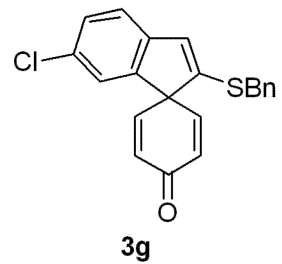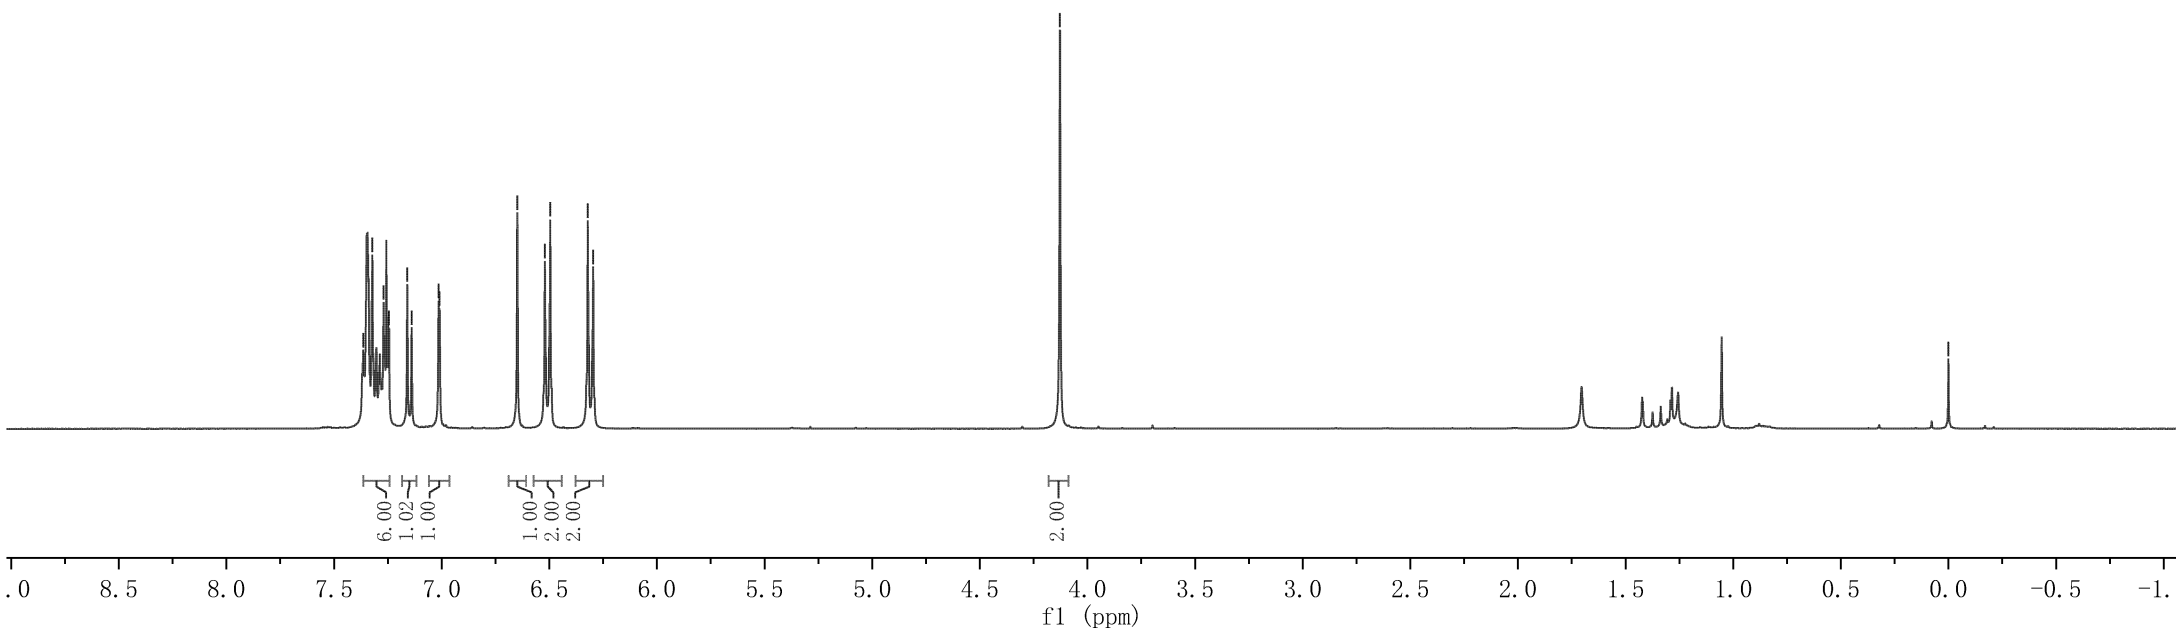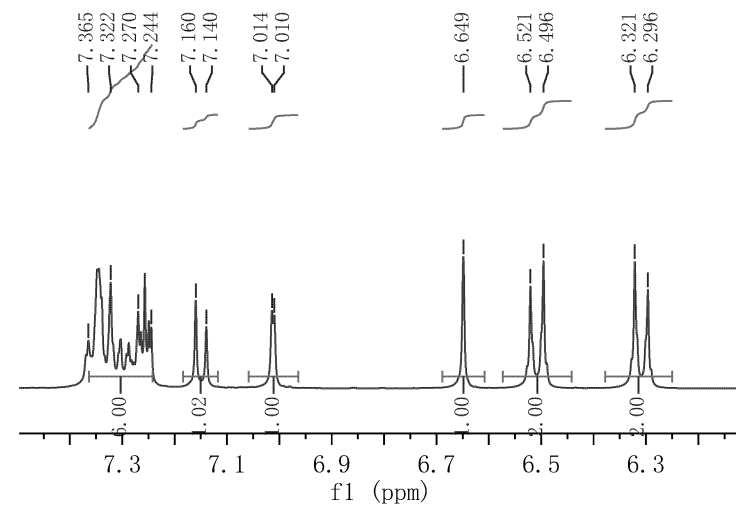

7.365  
7.322  
7.270  
7.244  
7.160  
7.140  
7.014  
7.010  
6.649  
6.521  
6.496  
6.321  
6.296

—4.128

—0.000

| Parameter                | Value               |
|--------------------------|---------------------|
| 1 Title                  | 3g-C-FXY-3-26-C     |
| 2 Origin                 | Bruker BioSpin GmbH |
| 3 Solvent                | CDC13               |
| 4 Temperature            | 300.0               |
| 5 Number of Scans        | 47                  |
| 6 Acquisition Time       | 1.3631              |
| 7 Acquisition Date       | 2020-08-05T14:13:42 |
| 8 Spectrometer Frequency | 100.61              |
| 9 Spectral Width         | 24038.5             |

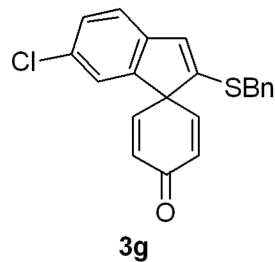

185.57

146.87  
146.84  
142.91  
142.73  
135.49  
131.18  
131.16  
128.86  
128.70  
128.70  
127.72  
126.11  
123.81  
120.64

77.32  
77.00  
76.68

60.78

37.41

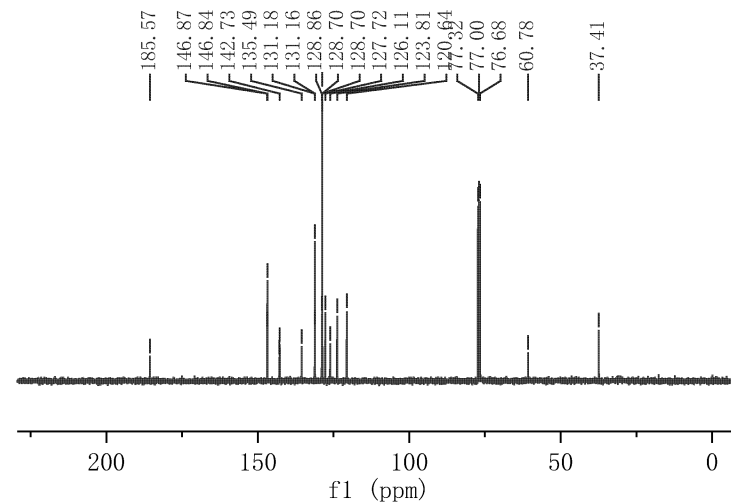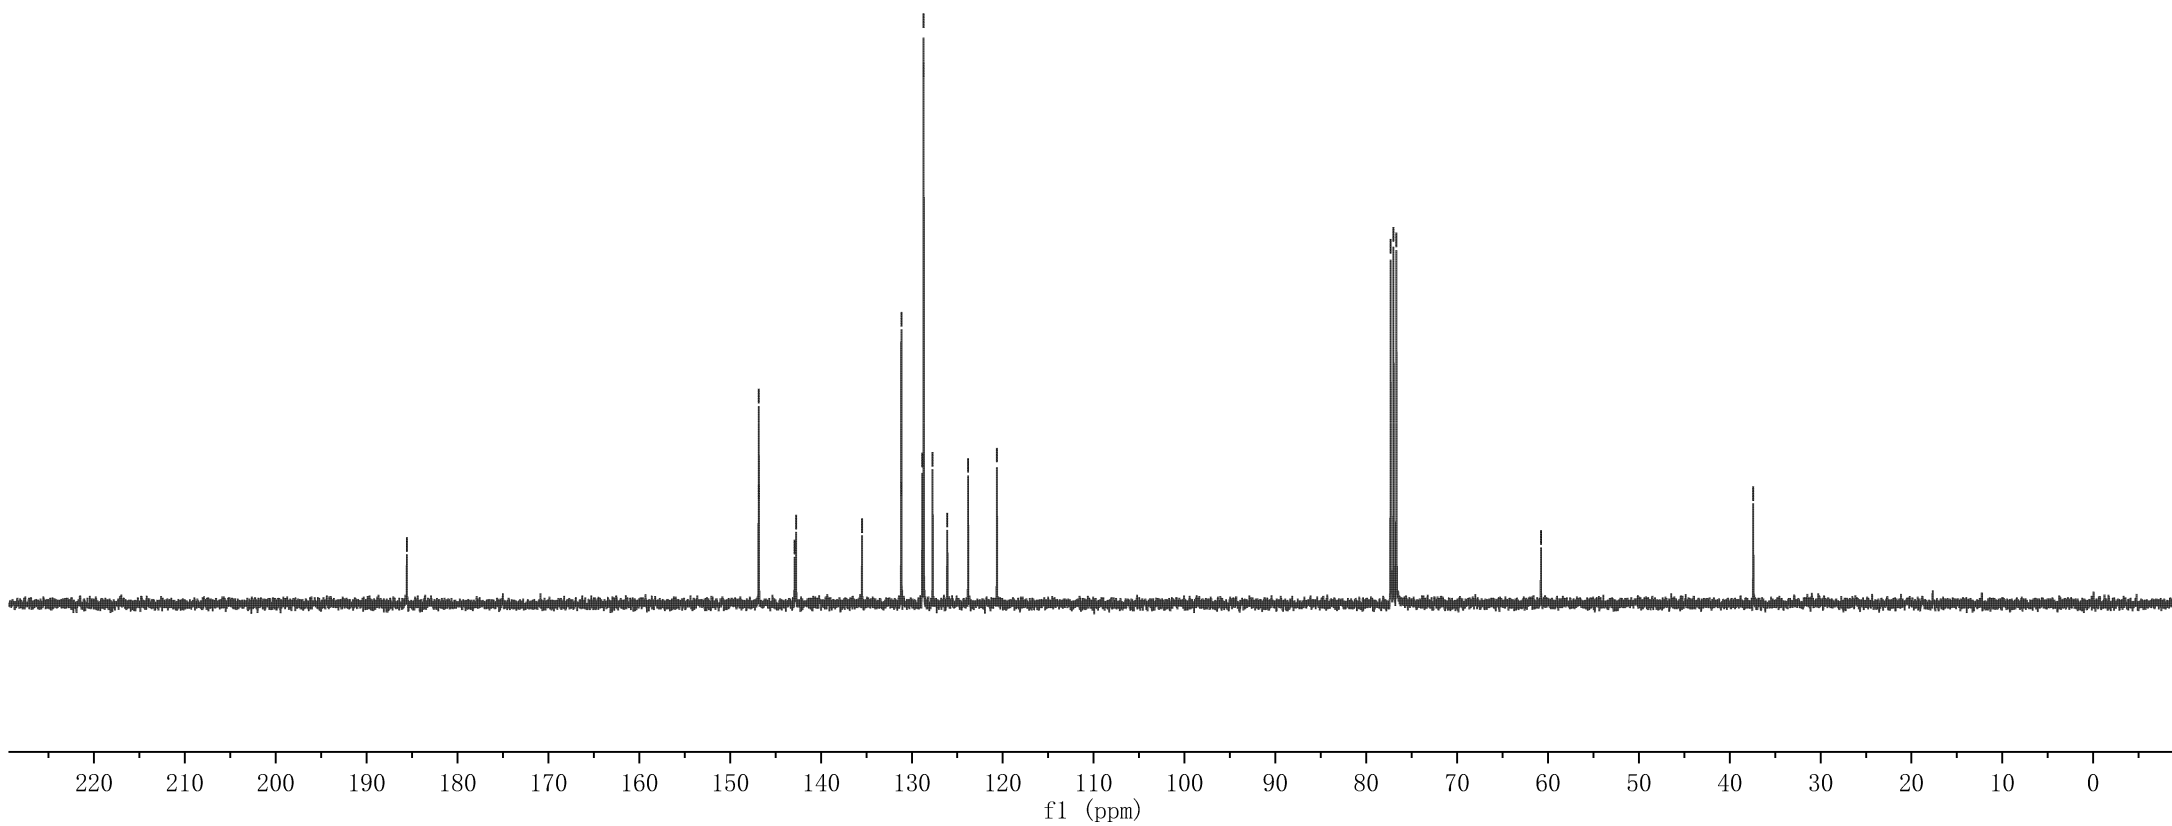

| Parameter                | Value               |
|--------------------------|---------------------|
| 1 Title                  | LJ-1-171            |
| 2 Origin                 | Bruker BioSpin GmbH |
| 3 Solvent                | CDCl3               |
| 4 Temperature            | 298.0               |
| 5 Number of Scans        | 12                  |
| 6 Acquisition Time       | 4.0894              |
| 7 Acquisition Date       | 2023-02-09T13:36:57 |
| 8 Spectrometer Frequency | 400.13              |
| 9 Spectral Width         | 8012.8              |

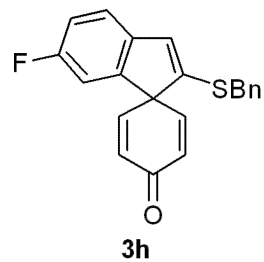

7.361  
7.340  
7.308  
7.236  
7.186  
7.174  
7.165  
7.153  
7.004  
6.981  
6.960  
6.954  
6.772  
6.766  
6.752  
6.746  
6.669  
6.512  
6.506  
6.481  
6.474  
6.314  
6.307  
6.282  
6.276

4.107

0.000

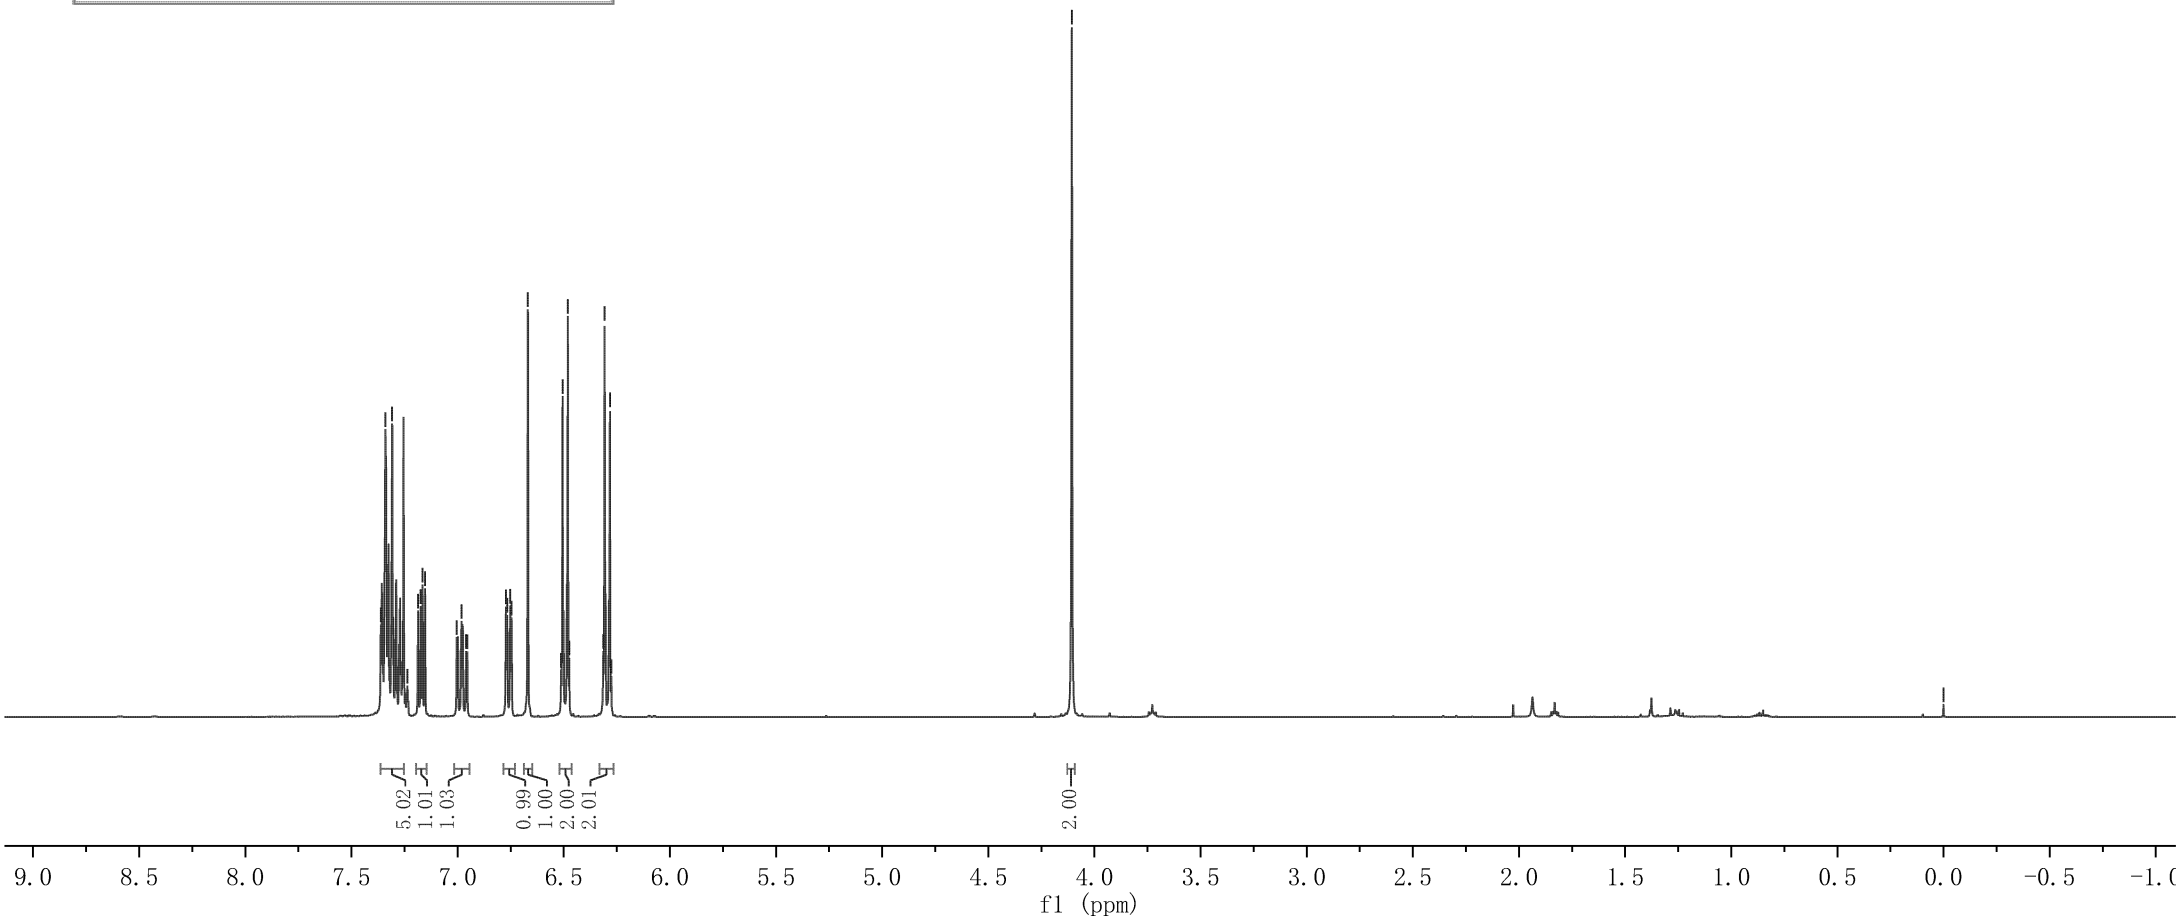



| Parameter                | Value               |
|--------------------------|---------------------|
| 1 Title                  | FXY-3-28            |
| 2 Origin                 |                     |
| 3 Solvent                | CDC13               |
| 4 Temperature            | 295.8               |
| 5 Number of Scans        | 500                 |
| 6 Acquisition Time       | 1.0000              |
| 7 Acquisition Date       | 2023-02-04T12:07:39 |
| 8 Spectrometer Frequency | 100.56              |
| 9 Spectral Width         | 26041.0             |

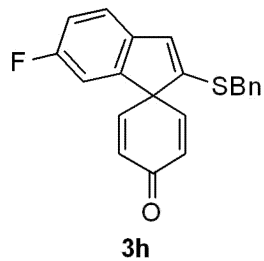

185.69  
 162.51  
 160.07  
 147.06  
 145.43  
 145.39  
 143.37  
 143.29  
 140.26  
 140.24  
 135.67  
 131.14  
 128.74  
 128.69  
 127.68  
 126.70  
 120.66  
 120.57  
 115.65  
 115.43  
 111.51  
 111.27

77.32  
 77.00  
 76.68

60.92

37.55

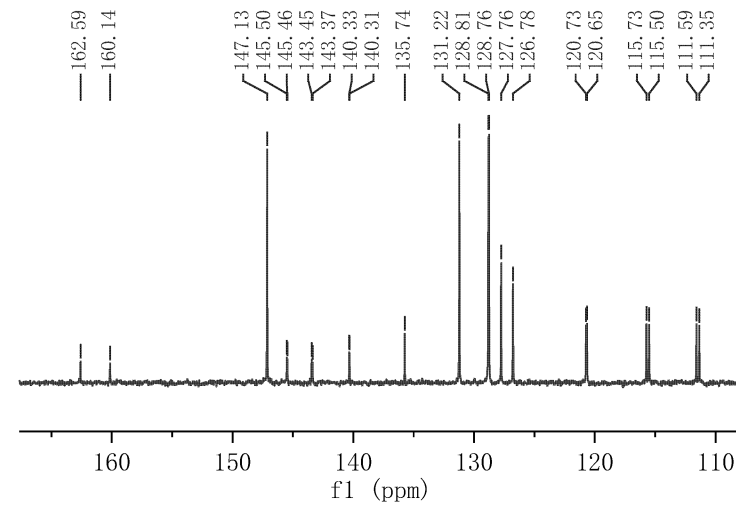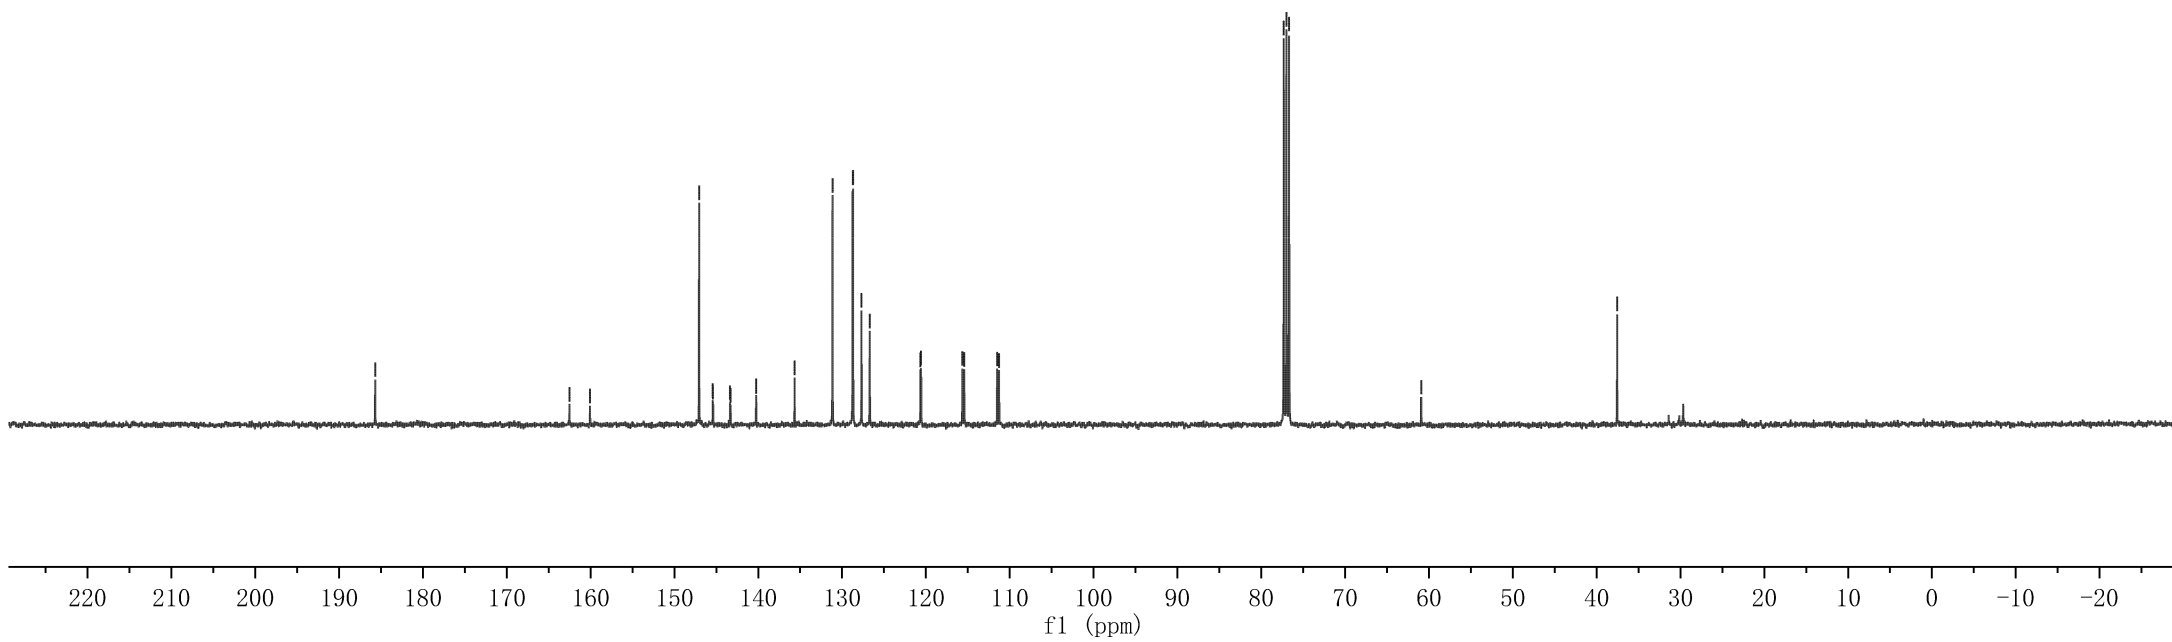

| Parameter                | Value               |
|--------------------------|---------------------|
| 1 Title                  | FXY-3-28            |
| 2 Origin                 |                     |
| 3 Solvent                | CDC13               |
| 4 Temperature            | 295.9               |
| 5 Number of Scans        | 16                  |
| 6 Acquisition Time       | 1.0000              |
| 7 Acquisition Date       | 2023-02-04T12:10:50 |
| 8 Spectrometer Frequency | 376.28              |
| 9 Spectral Width         | 96153.0             |

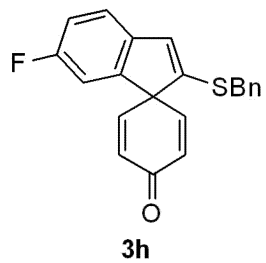

—116.15

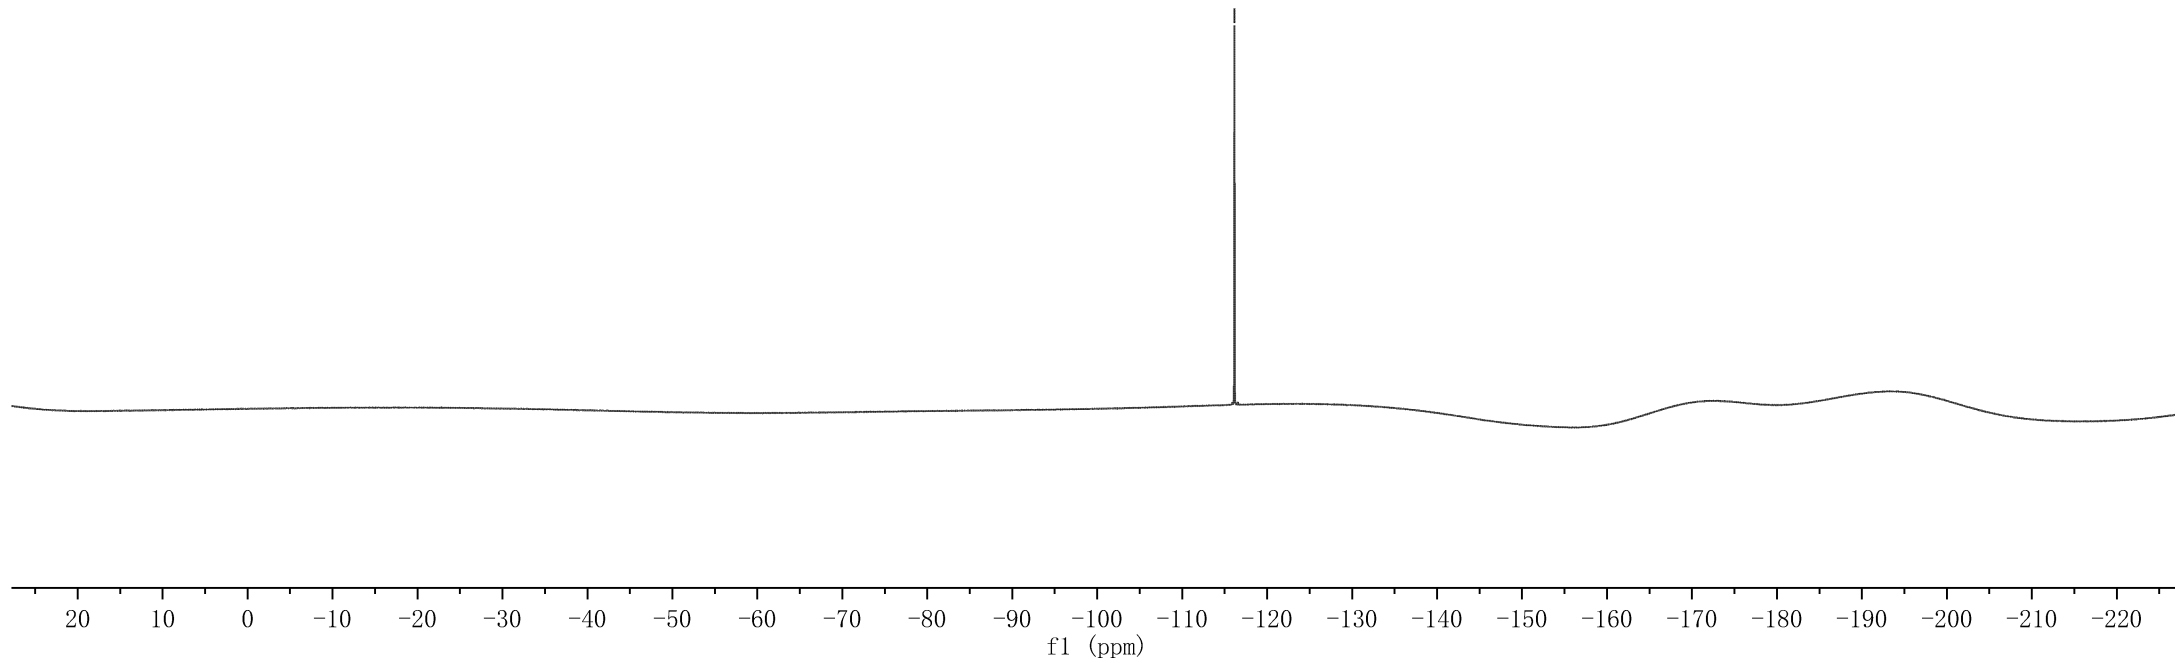

| Parameter                | Value               |
|--------------------------|---------------------|
| 1 Title                  | 3i-H-fxy-3-96       |
| 2 Origin                 | Bruker BioSpin GmbH |
| 3 Solvent                | CDC13               |
| 4 Temperature            | 298.0               |
| 5 Number of Scans        | 18                  |
| 6 Acquisition Time       | 4.0894              |
| 7 Acquisition Date       | 2021-05-17T10:38:03 |
| 8 Spectrometer Frequency | 400.13              |
| 9 Spectral Width         | 8012.8              |

7.368  
7.350  
7.317  
7.280  
6.963  
6.942  
6.931  
6.912  
6.803  
6.781  
6.760  
6.636  
6.494  
6.469  
6.314  
6.290

4.135

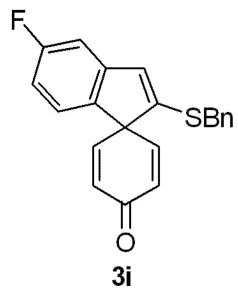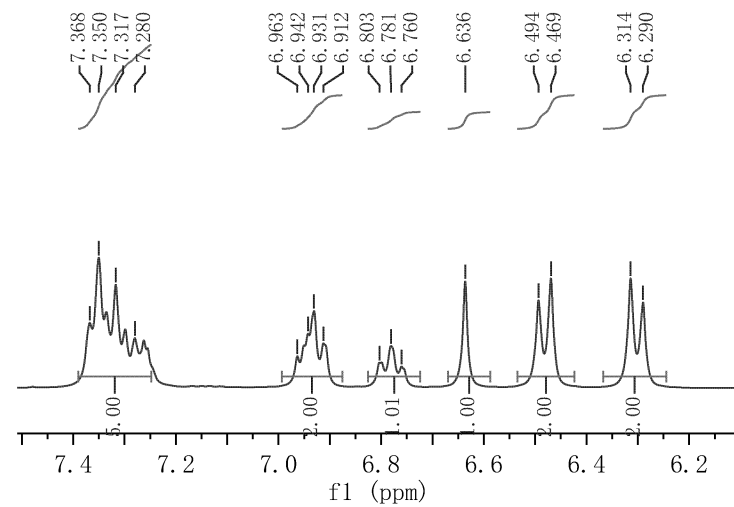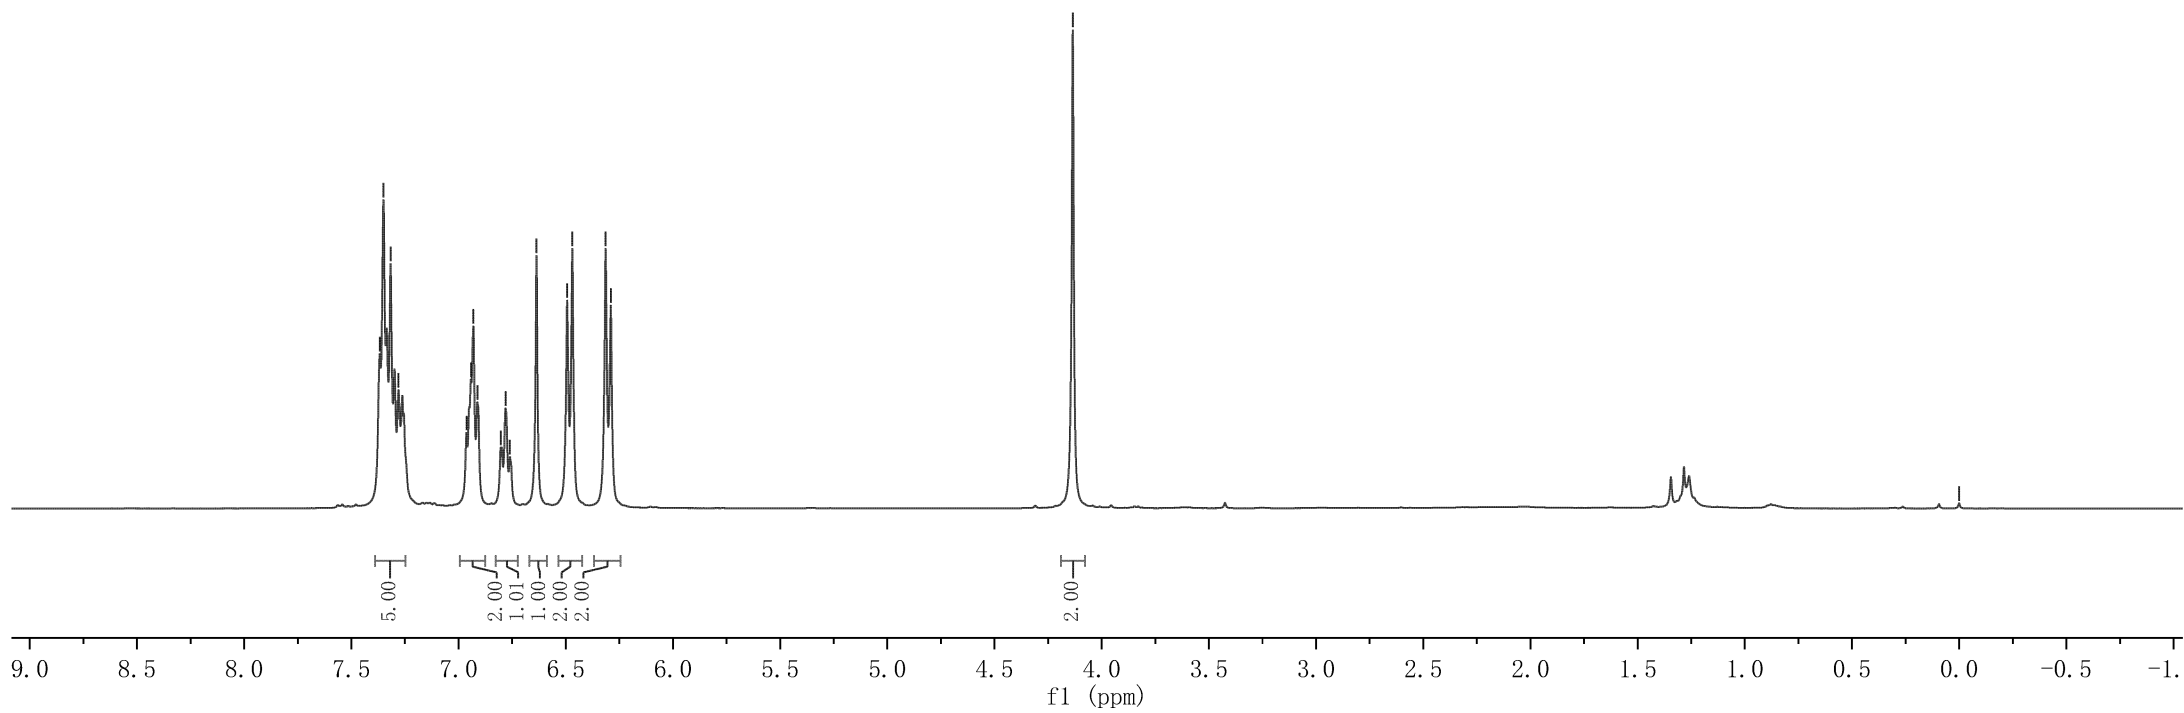

| Parameter                | Value                        |
|--------------------------|------------------------------|
| 1 Title                  | 3i_C-fxy-3-96-C <sup>-</sup> |
| 2 Origin                 | Bruker BioSpin GmbH          |
| 3 Solvent                | CDC13                        |
| 4 Temperature            | 300.0                        |
| 5 Number of Scans        | 28                           |
| 6 Acquisition Time       | 1.3631                       |
| 7 Acquisition Date       | 2021-05-17T10:41:06          |
| 8 Spectrometer Frequency | 100.61                       |
| 9 Spectral Width         | 24038.5                      |



185.63  
 164.57  
 162.13  
 148.73  
 147.36  
 146.14  
 146.05  
 136.28  
 136.26  
 135.34  
 130.74  
 128.62  
 127.64  
 125.71  
 124.21  
 124.12  
 111.79  
 111.56  
 107.30  
 107.06

77.32  
 77.00  
 76.68  
 60.13  
 37.20

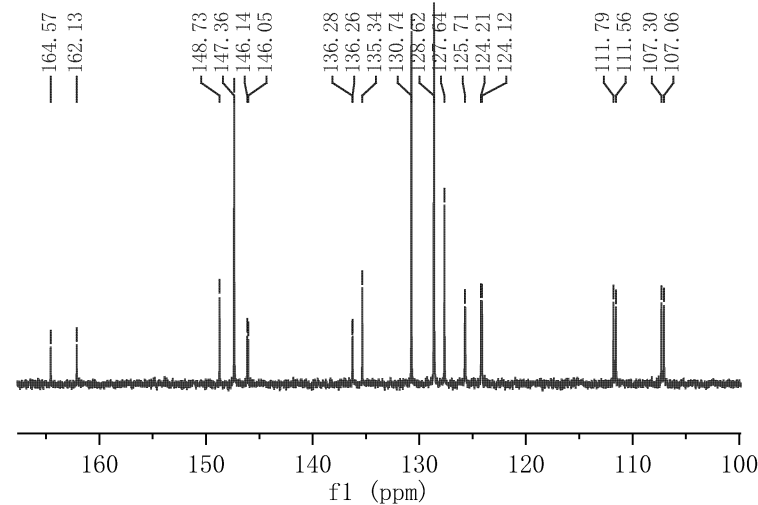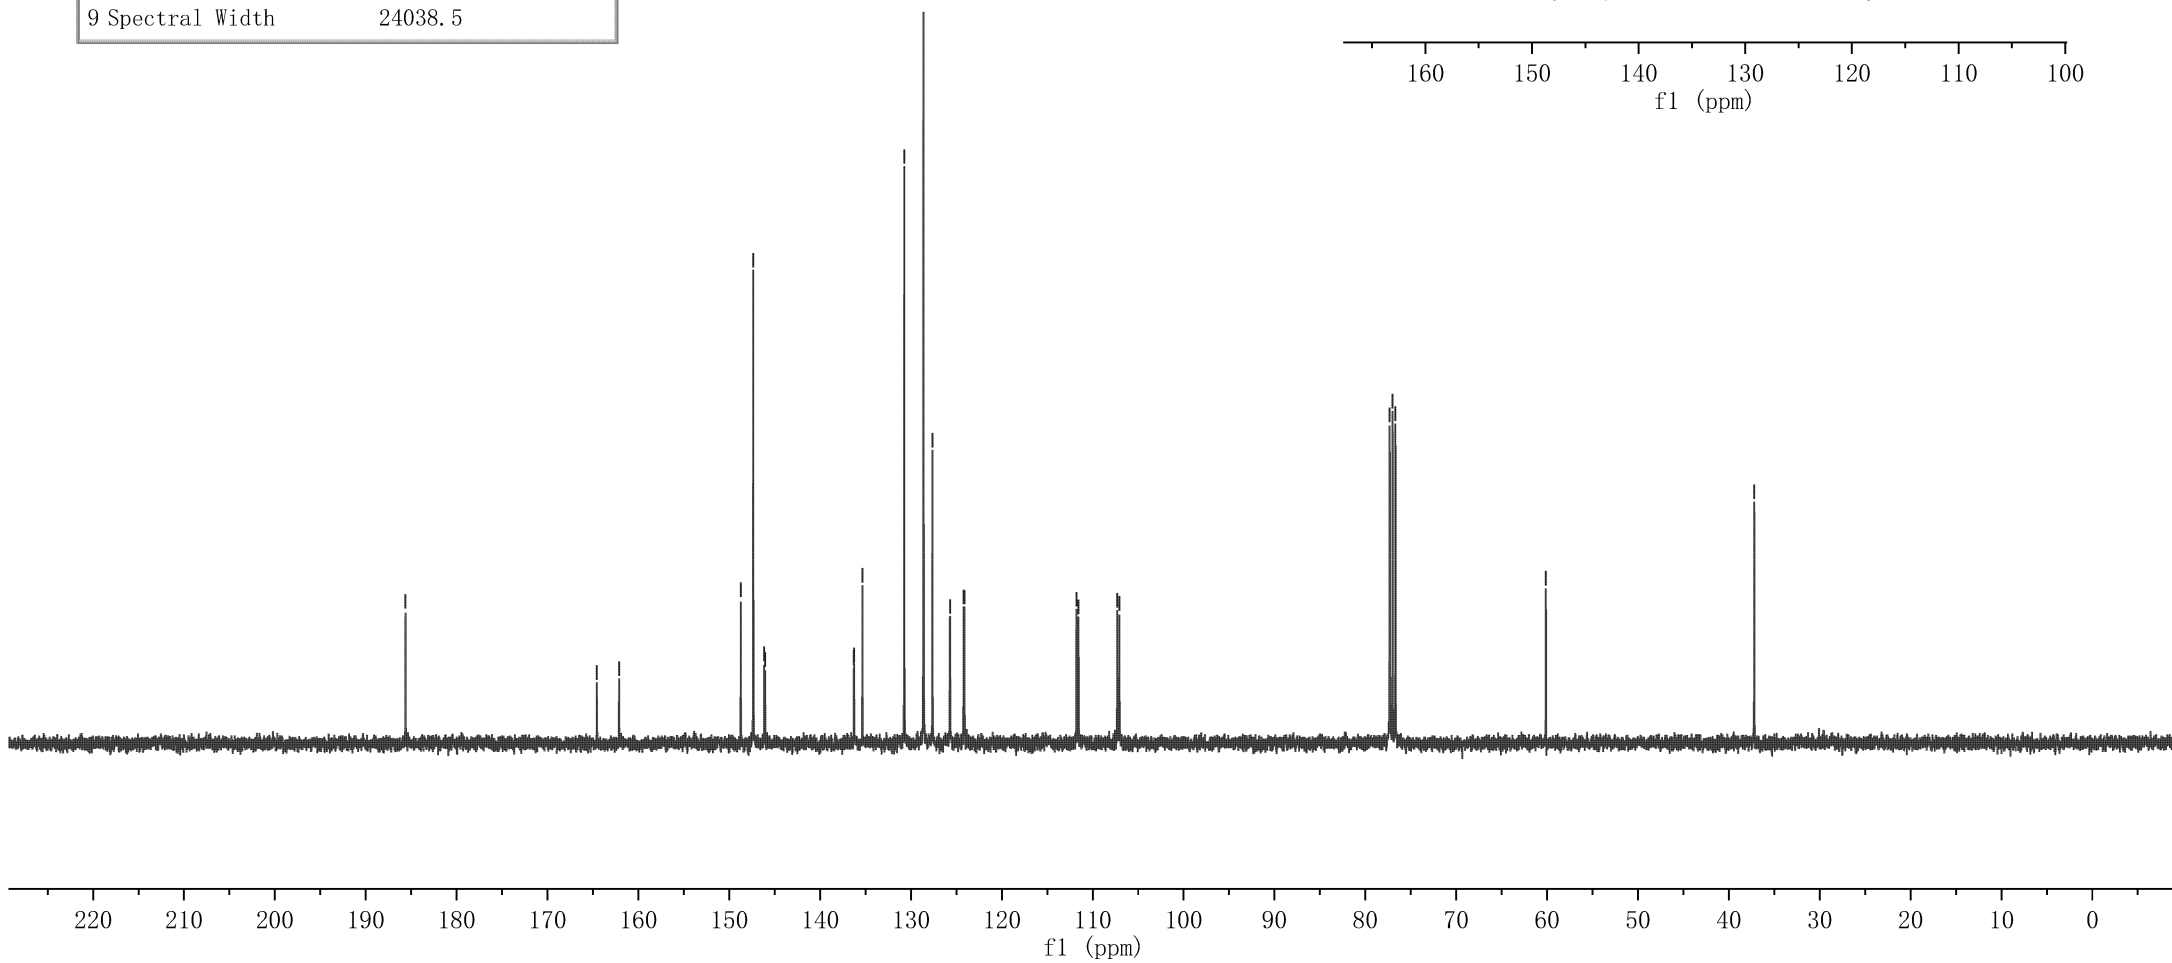

| Parameter                | Value               |
|--------------------------|---------------------|
| 1 Title                  | fxv-3i-f-nmr        |
| 2 Origin                 |                     |
| 3 Solvent                | CDC13               |
| 4 Temperature            | 296.6               |
| 5 Number of Scans        | 32                  |
| 6 Acquisition Time       | 1.0000              |
| 7 Acquisition Date       | 2023-03-03T09:09:49 |
| 8 Spectrometer Frequency | 376.28              |
| 9 Spectral Width         | 96153.0             |

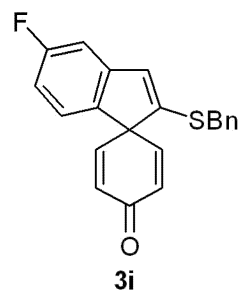

---113.15

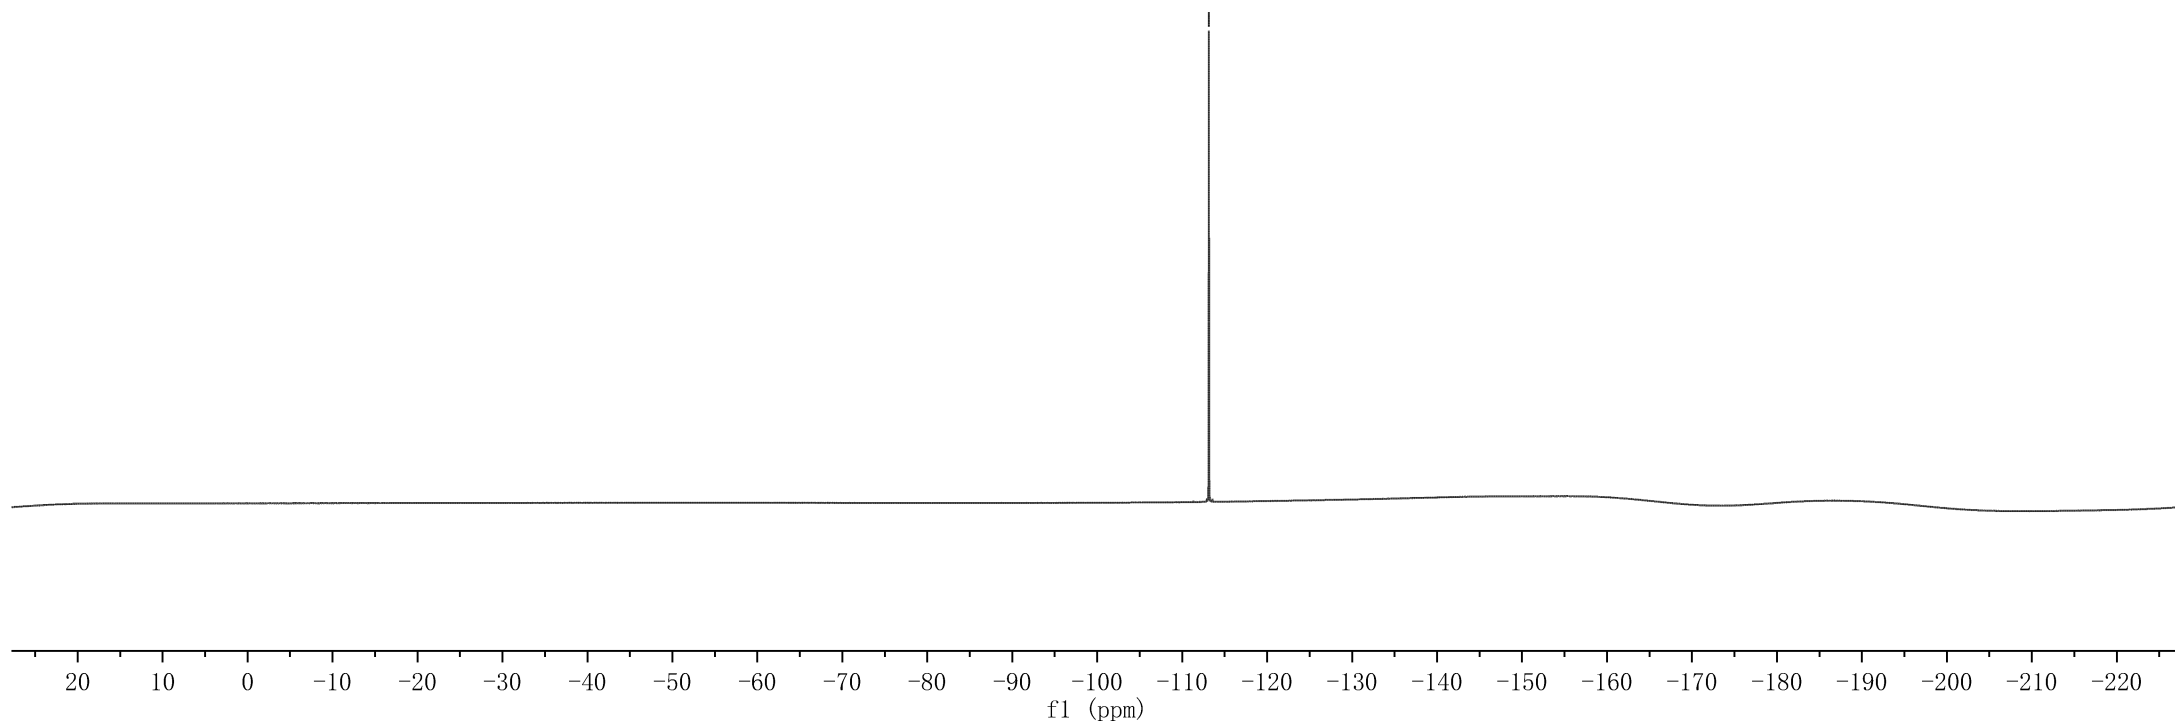

| Parameter                | Value               |
|--------------------------|---------------------|
| 1 Title                  | 3j-H-fxy-3-56       |
| 2 Origin                 | Bruker BioSpia GmbH |
| 3 Solvent                | CDCl3               |
| 4 Temperature            | 298.0               |
| 5 Number of Scans        | 8                   |
| 6 Acquisition Time       | 4.0894              |
| 7 Acquisition Date       | 2021-05-24T16:42:38 |
| 8 Spectrometer Frequency | 400.13              |
| 9 Spectral Width         | 8012.8              |

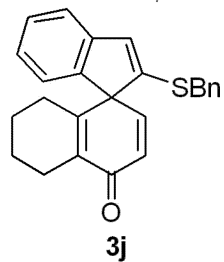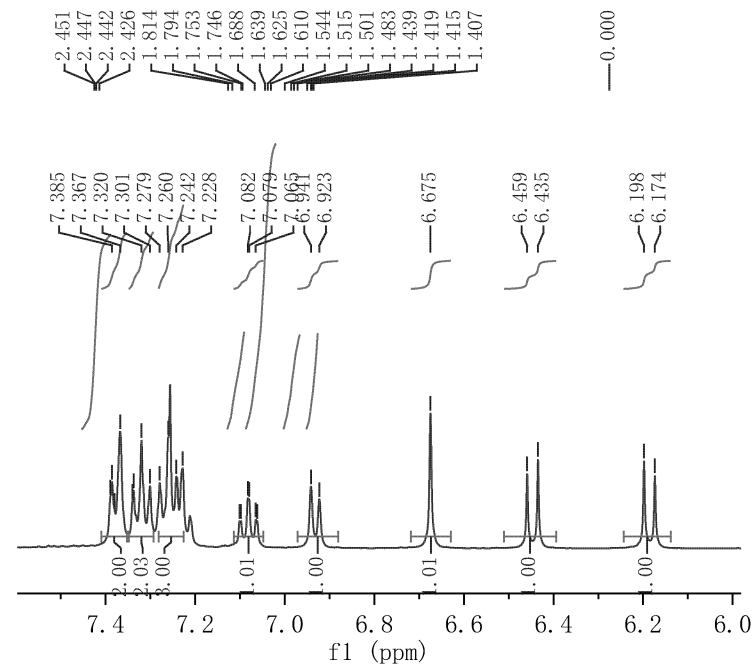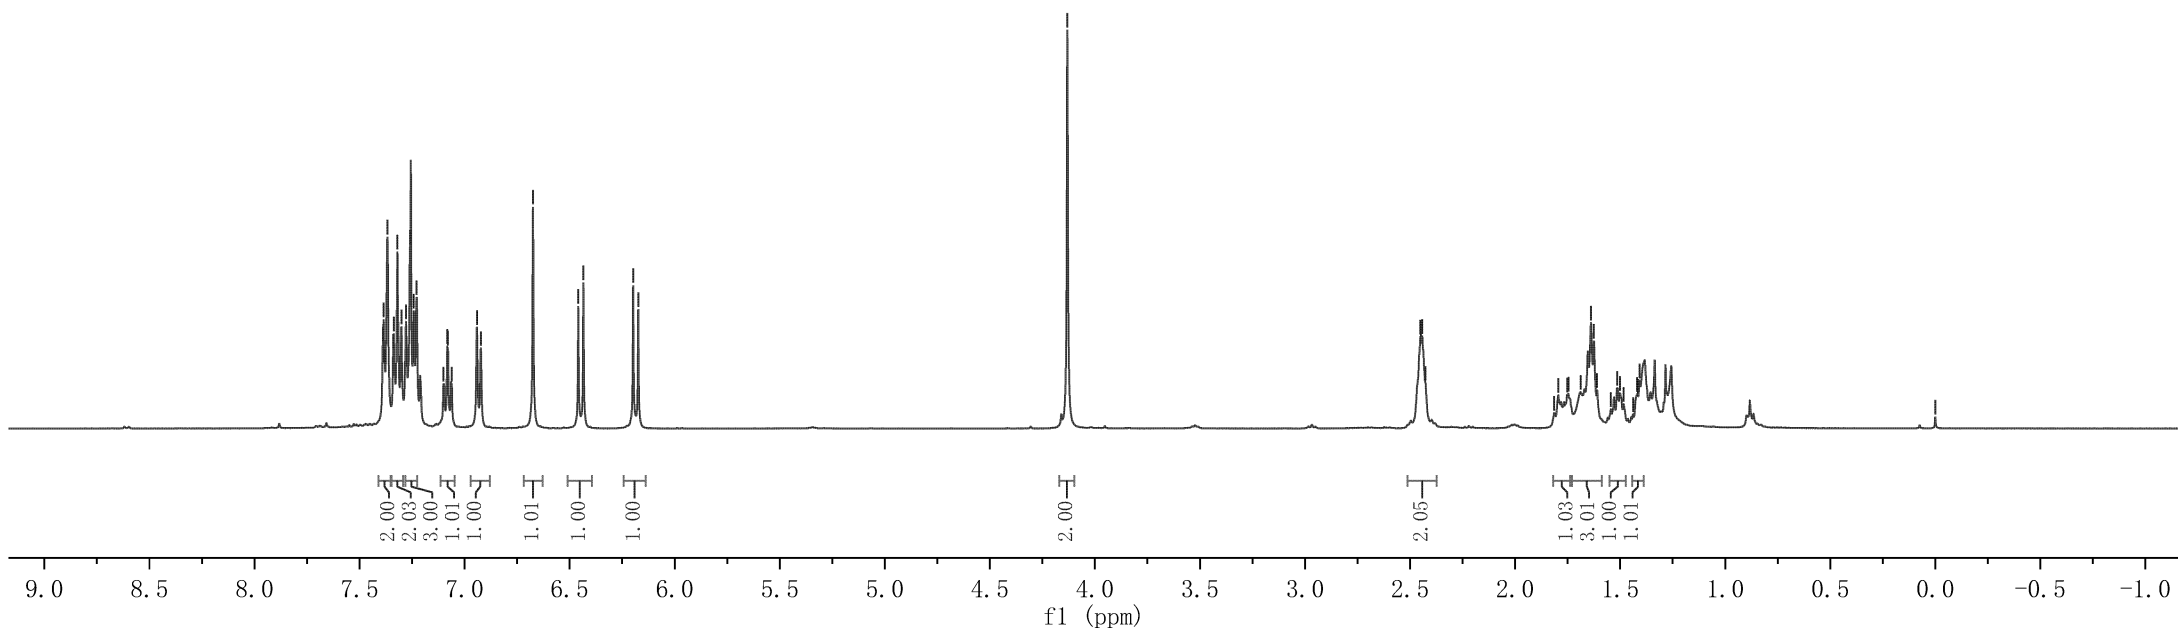

| Parameter                | Value               |
|--------------------------|---------------------|
| 1 Title                  | 3j-C-fxy-3-56-C     |
| 2 Origin                 | Bruker BioSpin GmbH |
| 3 Solvent                | CDC13               |
| 4 Temperature            | 300.0               |
| 5 Number of Scans        | 24                  |
| 6 Acquisition Time       | 1.3631              |
| 7 Acquisition Date       | 2021-05-24T16:44:09 |
| 8 Spectrometer Frequency | 100.61              |
| 9 Spectral Width         | 24038.5             |

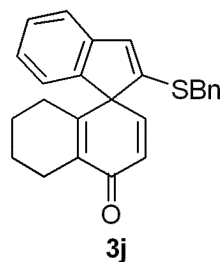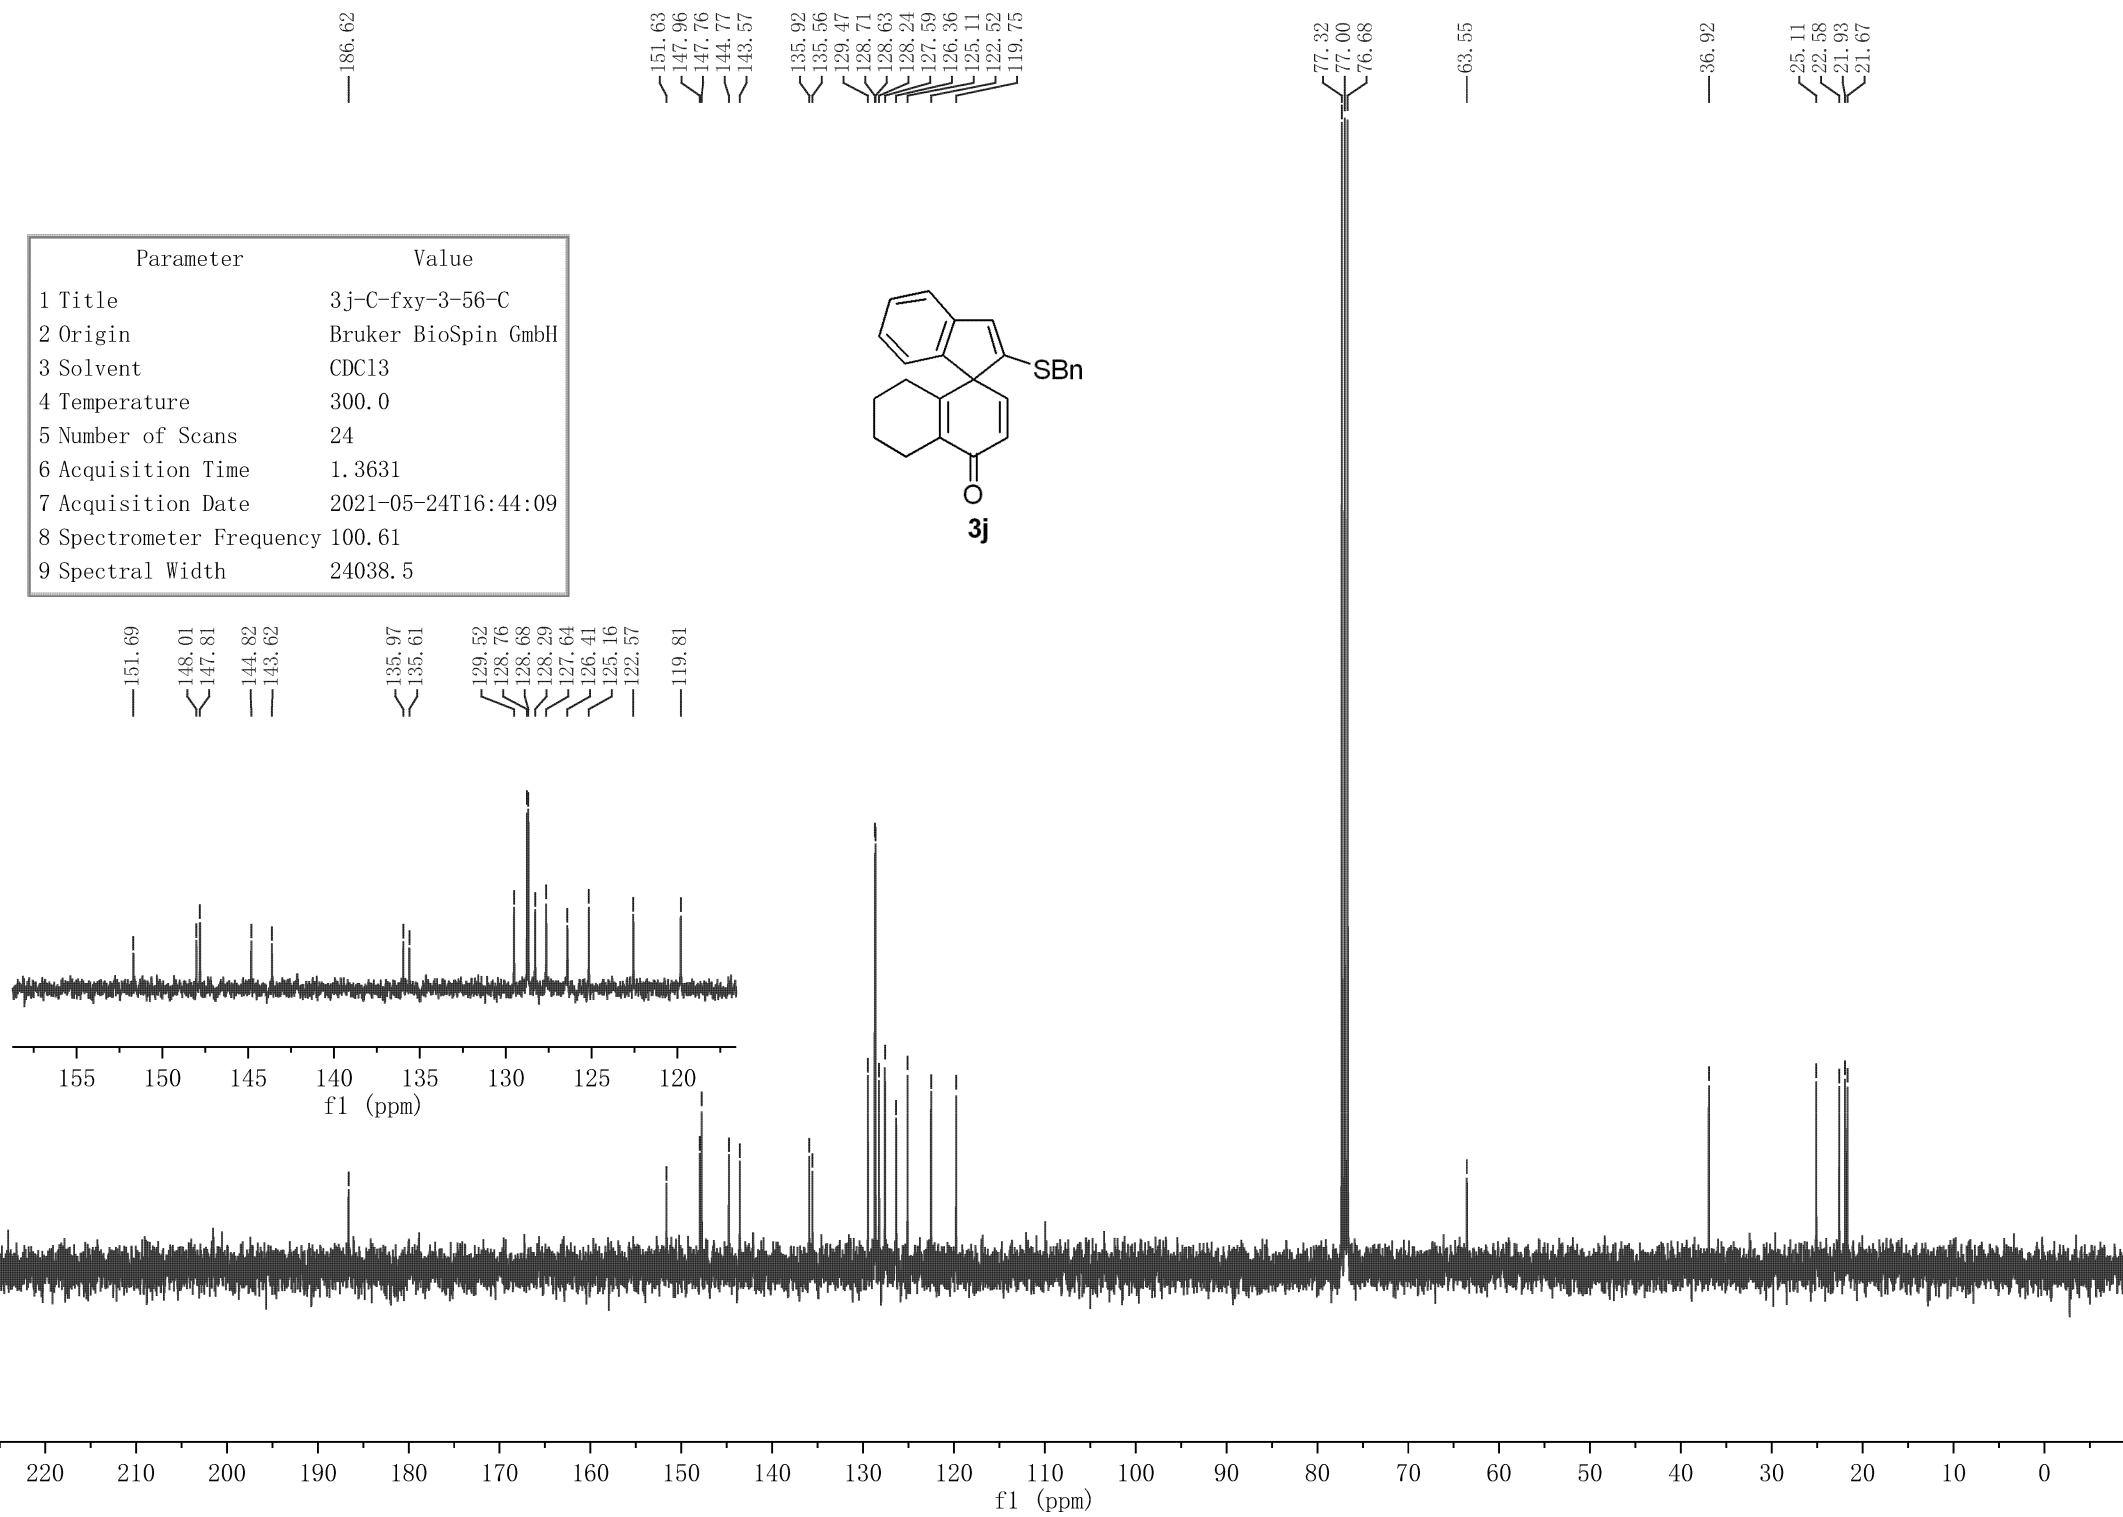

| Parameter                | Value               |
|--------------------------|---------------------|
| 1 Title                  | 3k-H-FXY-2-197      |
| 2 Origin                 | Bruker BioSpin GmbH |
| 3 Solvent                | CDCl3               |
| 4 Temperature            | 298.0               |
| 5 Number of Scans        | 10                  |
| 6 Acquisition Time       | 4.0894              |
| 7 Acquisition Date       | 2020-07-13T16:05:05 |
| 8 Spectrometer Frequency | 400.13              |
| 9 Spectral Width         | 8012.8              |

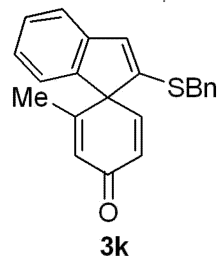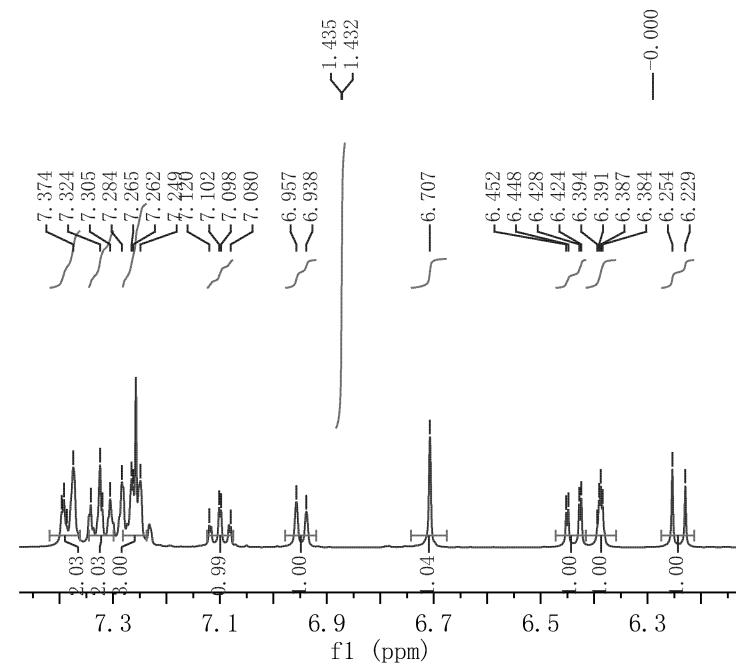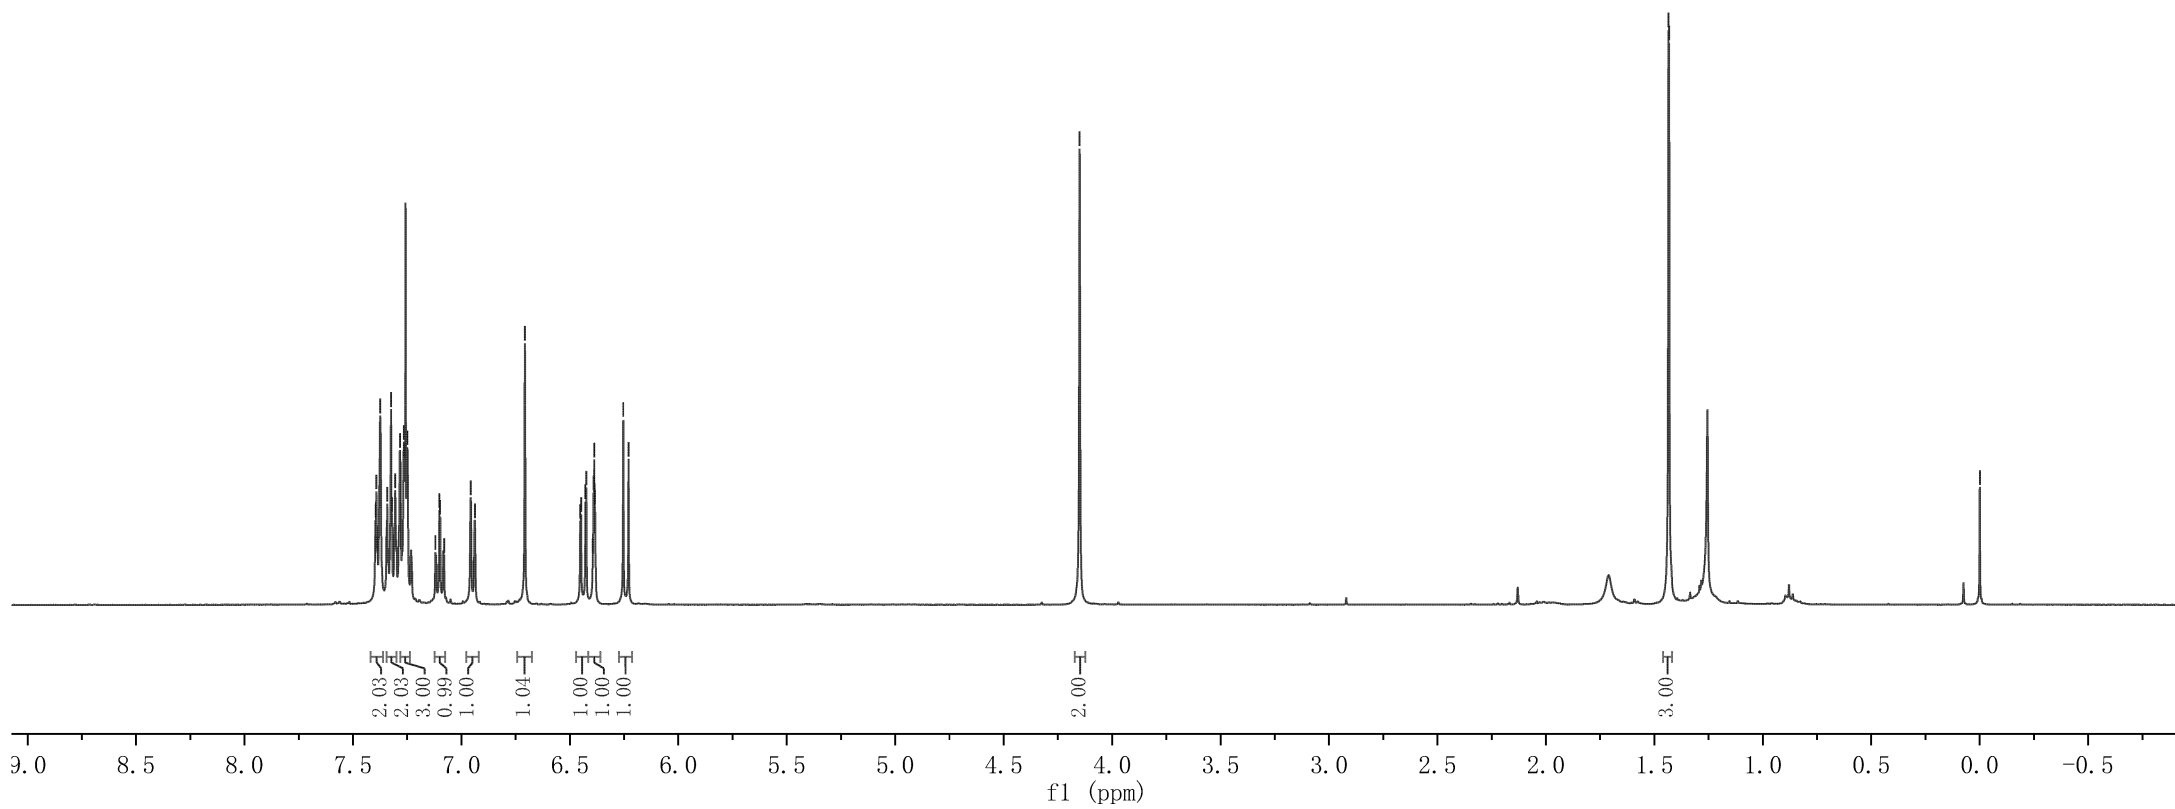



| Parameter                | Value               |
|--------------------------|---------------------|
| 1 Title                  | 3k-C-FXY-2-197-C    |
| 2 Origin                 | Bruker BioSpin GmbH |
| 3 Solvent                | CDC13               |
| 4 Temperature            | 300.0               |
| 5 Number of Scans        | 25                  |
| 6 Acquisition Time       | 1.3631              |
| 7 Acquisition Date       | 2020-07-13T16:07:38 |
| 8 Spectrometer Frequency | 100.61              |
| 9 Spectral Width         | 24038.5             |

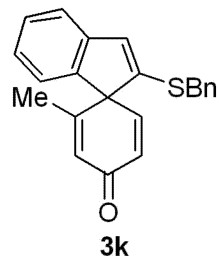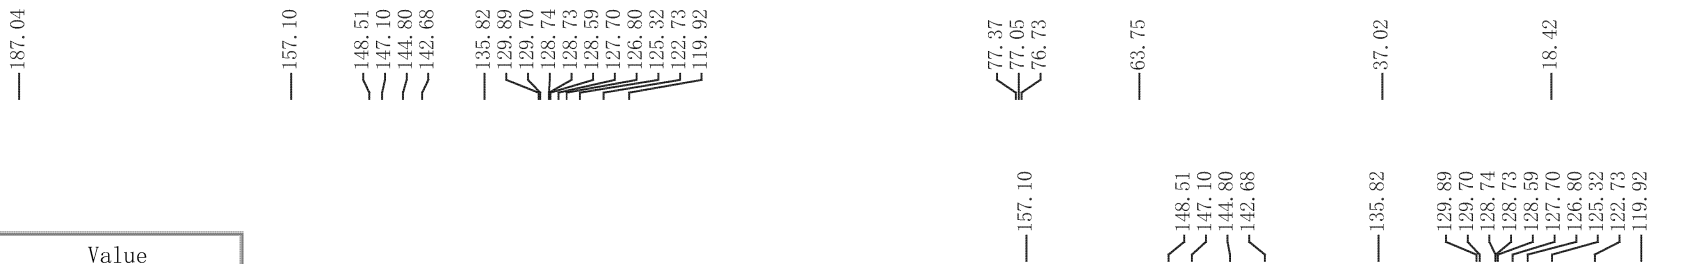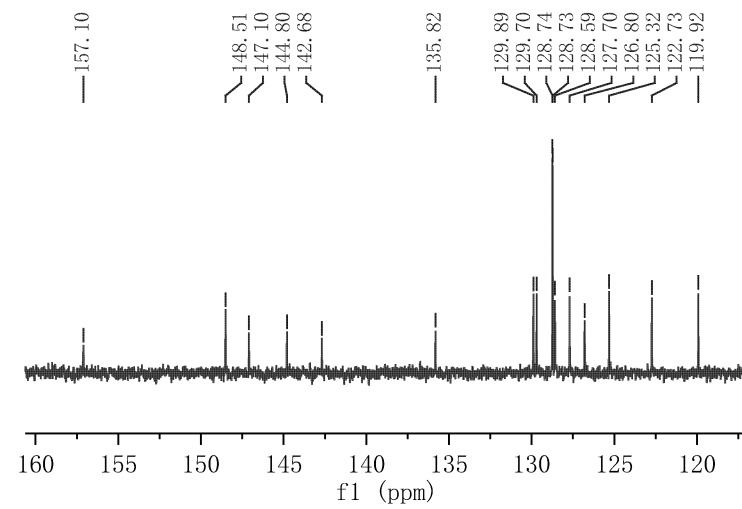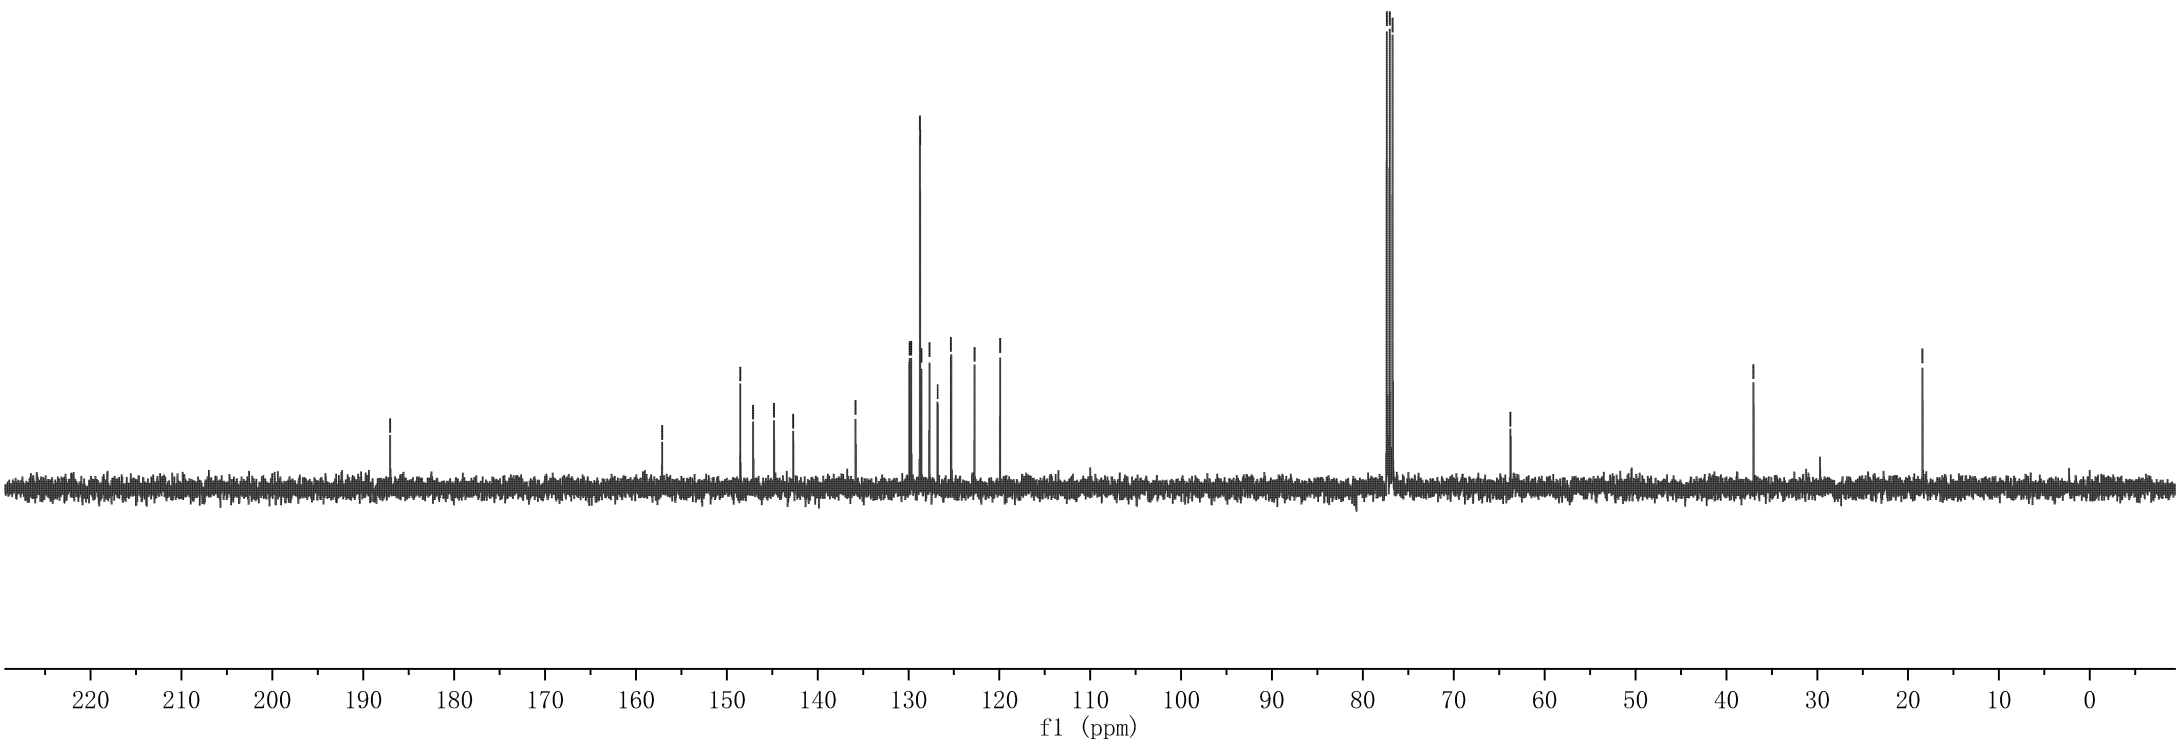

| Parameter                | Value               |
|--------------------------|---------------------|
| 1 Title                  | 31-H-fxy-2-175-H    |
| 2 Origin                 | Bruker BioSpin GmbH |
| 3 Solvent                | CDC13               |
| 4 Temperature            | 298.7               |
| 5 Number of Scans        | 23                  |
| 6 Acquisition Time       | 3.9846              |
| 7 Acquisition Date       | 2020-07-06T14:39:09 |
| 8 Spectrometer Frequency | 400.03              |
| 9 Spectral Width         | 8223.7              |

7.369  
7.365  
7.360  
7.347  
7.329  
7.308  
7.304  
7.290  
7.273  
7.257  
7.244  
7.229  
7.122  
7.104  
7.100  
7.082  
7.040  
7.021  
6.678  
6.505  
6.480  
6.269  
6.263  
6.245  
6.239

5.311  
5.305

4.117

3.599

0.000

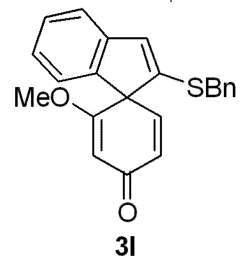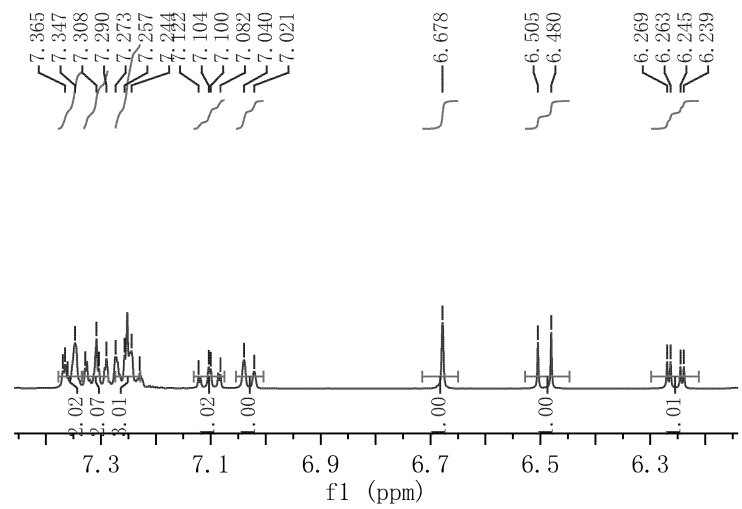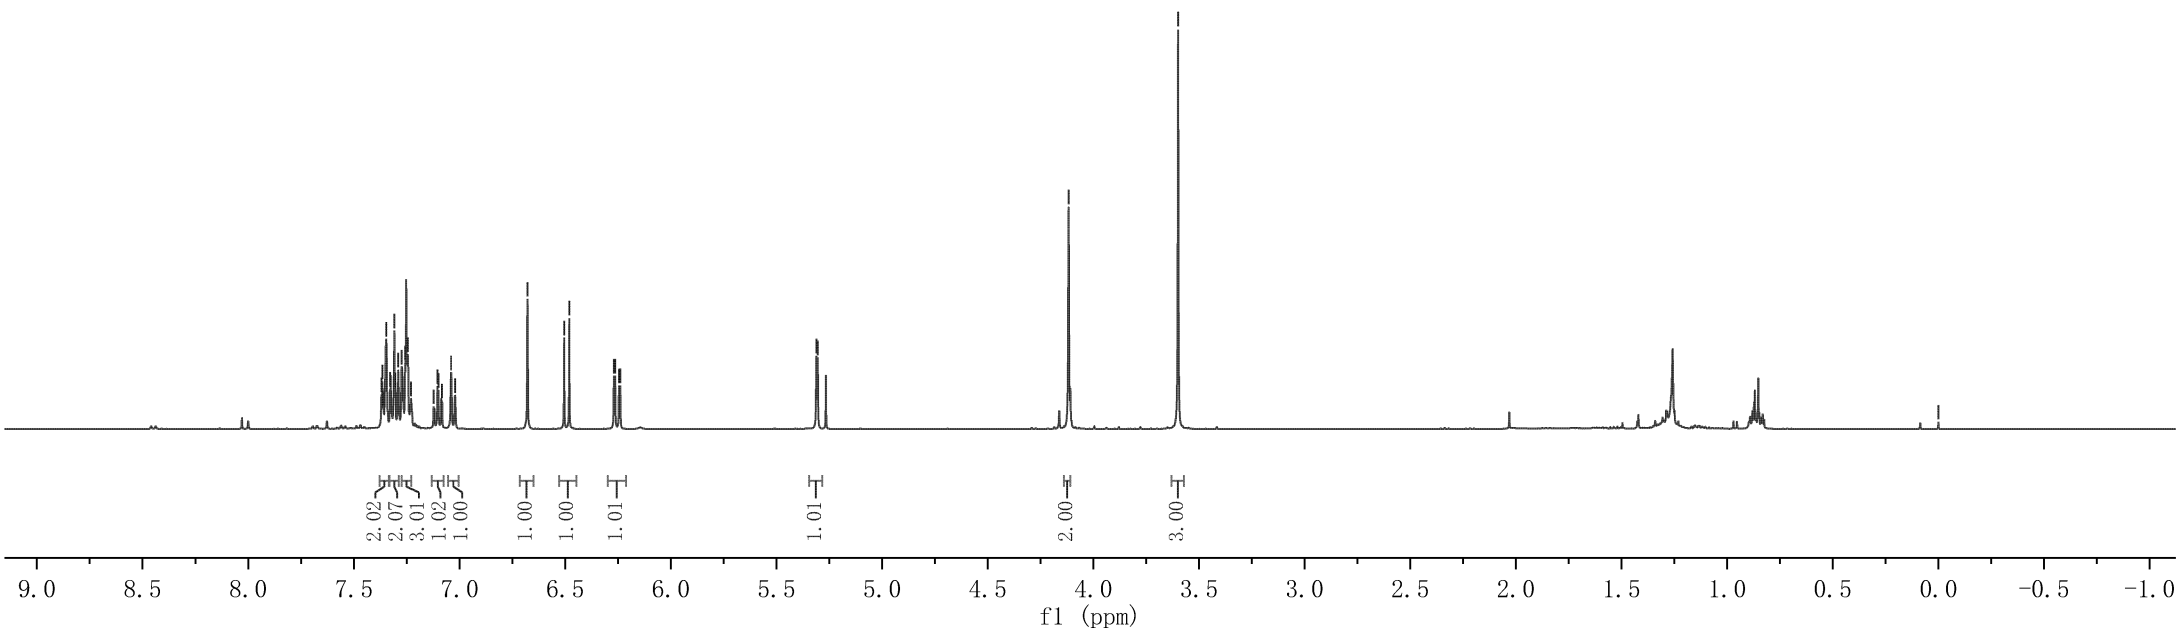

| Parameter                | Value               |
|--------------------------|---------------------|
| 1 Title                  | 31-C-fxy-2-175-C    |
| 2 Origin                 | Bruker BioSpin GmbH |
| 3 Solvent                | CDC13               |
| 4 Temperature            | 298.8               |
| 5 Number of Scans        | 22                  |
| 6 Acquisition Time       | 1.3631              |
| 7 Acquisition Date       | 2020-07-06T14:41:33 |
| 8 Spectrometer Frequency | 100.59              |
| 9 Spectral Width         | 24038.5             |

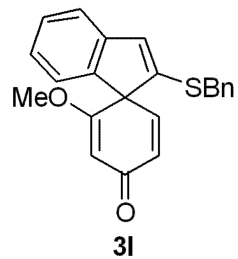

181.09

153.00  
148.39  
147.03  
143.87  
142.05  
135.78  
130.20  
128.63  
128.56  
128.46  
127.51  
125.19  
123.01  
119.87

77.32  
77.00  
76.68

61.29

54.95

37.20

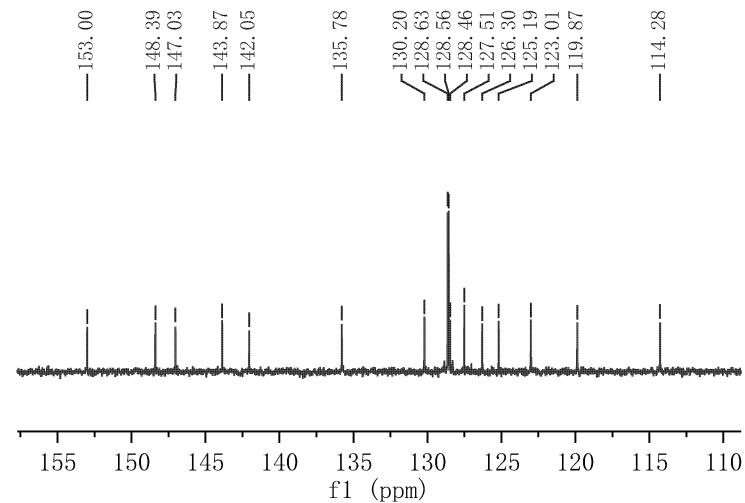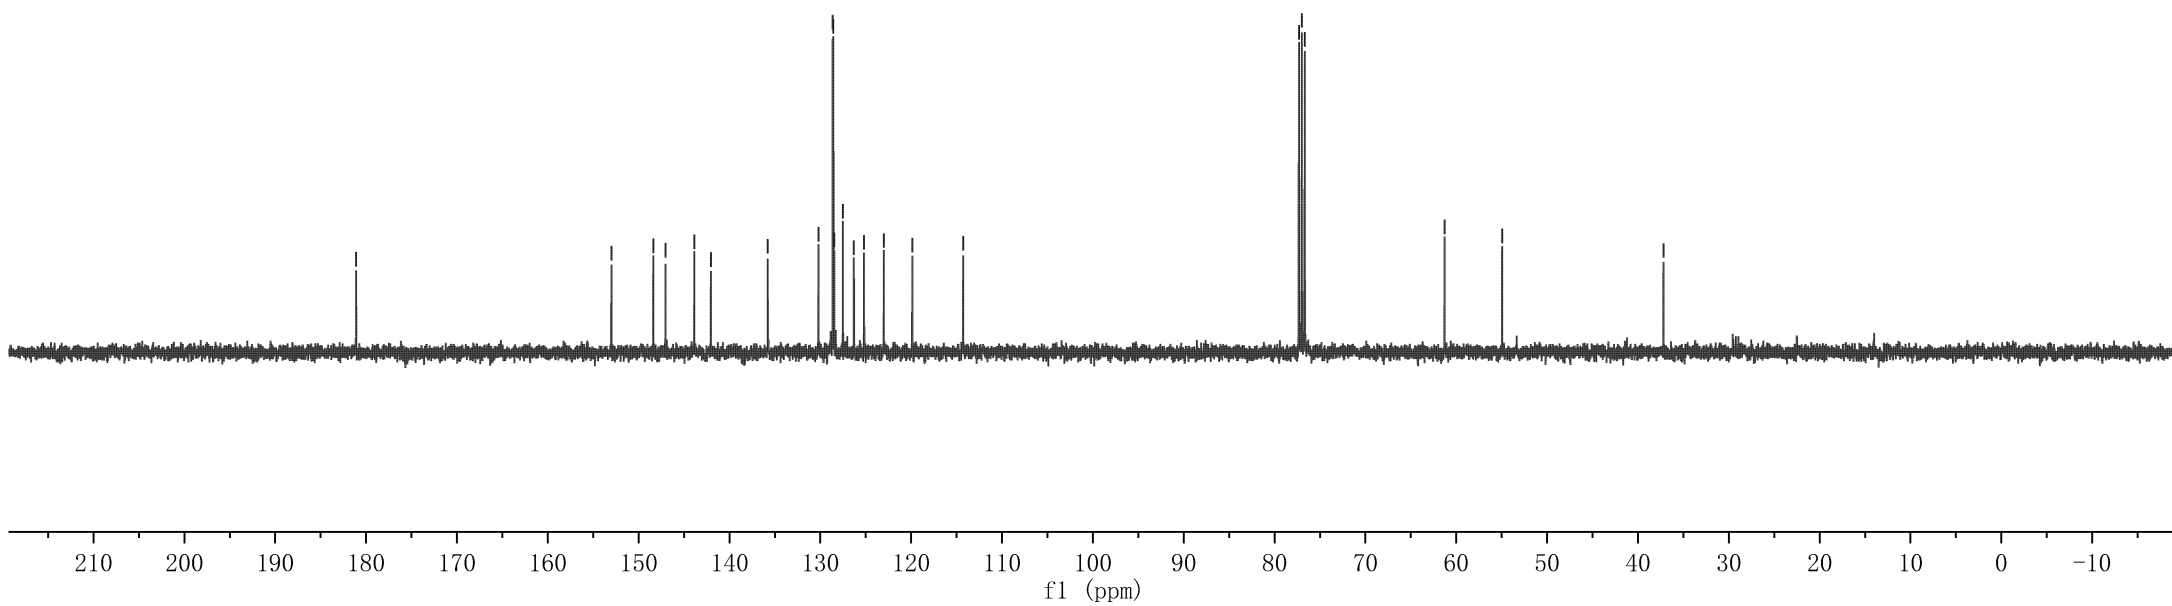

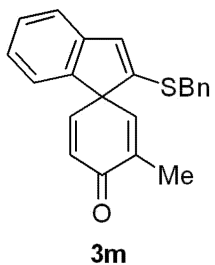

7.378  
7.355  
7.320  
7.302  
7.294  
7.283  
7.275  
7.265  
7.243  
7.241  
7.224  
7.221  
7.123  
7.104  
7.101  
7.083  
7.022  
7.003  
6.685  
6.506  
6.481  
6.322  
6.315  
6.298  
6.291  
6.119  
6.115  
6.112  
6.108

4.124

1.951  
1.947

0.000

| Parameter                | Value               |
|--------------------------|---------------------|
| 1 Title                  | FXY-3-80-h          |
| 2 Origin                 | Bruker BioSpin GmbH |
| 3 Solvent                | CDCl <sub>3</sub>   |
| 4 Temperature            | 298.0               |
| 5 Number of Scans        | 22                  |
| 6 Acquisition Time       | 4.0894              |
| 7 Acquisition Date       | 2023-01-31T15:51:03 |
| 8 Spectrometer Frequency | 400.13              |
| 9 Spectral Width         | 8012.8              |

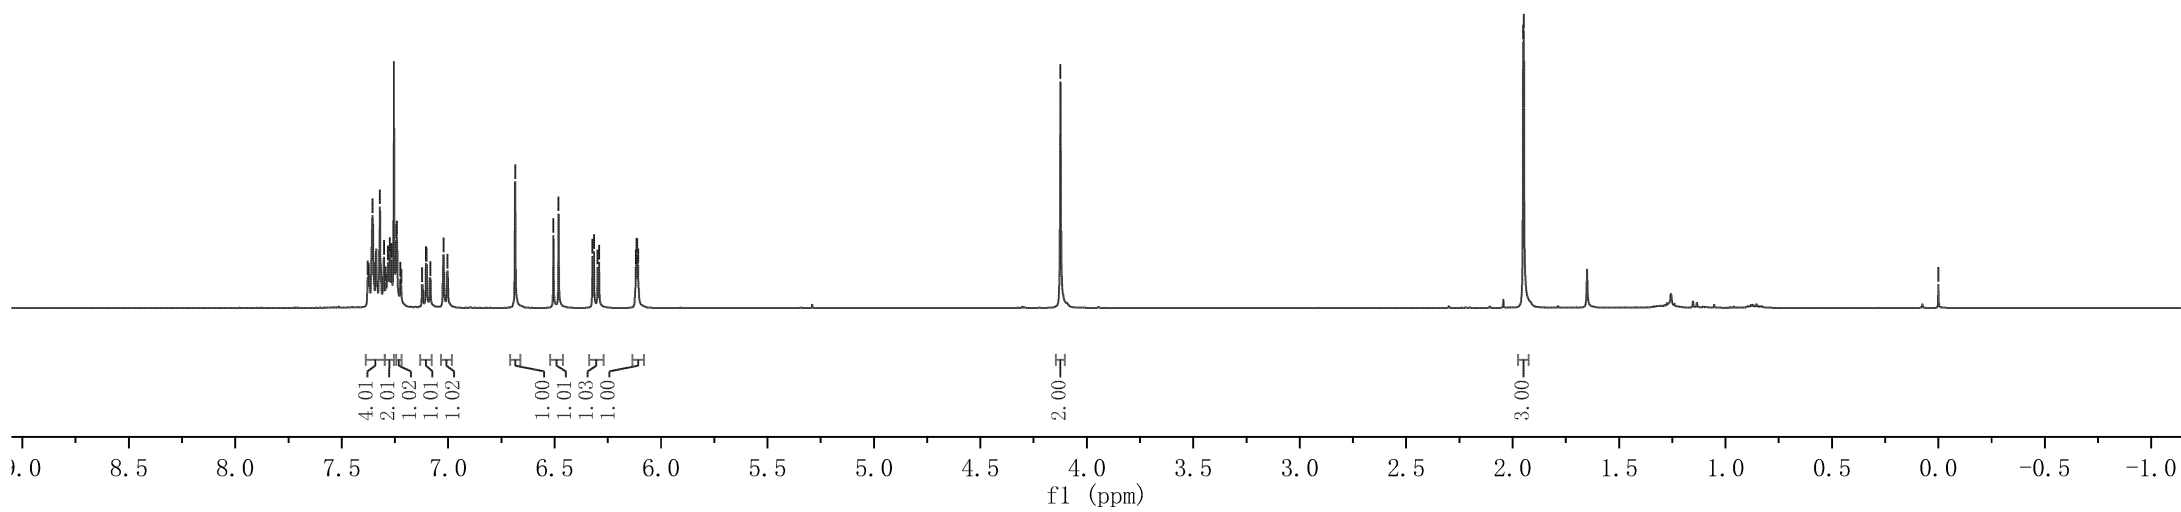

| Parameter                | Value               |
|--------------------------|---------------------|
| 1 Title                  | FXY-3-80-C          |
| 2 Origin                 | Bruker BioSpin GmbH |
| 3 Solvent                | CDC13               |
| 4 Temperature            | 300.0               |
| 5 Number of Scans        | 151                 |
| 6 Acquisition Time       | 1.3631              |
| 7 Acquisition Date       | 2023-01-31T15:52:14 |
| 8 Spectrometer Frequency | 100.61              |
| 9 Spectral Width         | 24038.5             |

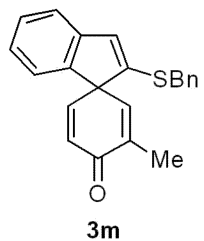

186.70

147.51  
146.52  
144.29  
142.68  
141.67  
137.47  
135.83  
130.60  
128.75  
128.65  
128.47  
127.60  
126.84  
125.16  
123.20  
119.88

77.32  
77.00  
76.68

61.31

37.41

16.14

147.51  
146.52  
144.29  
142.68  
141.67

137.47  
135.83

130.60  
128.75  
128.65  
128.47  
127.60  
126.84  
125.16  
123.20

119.88

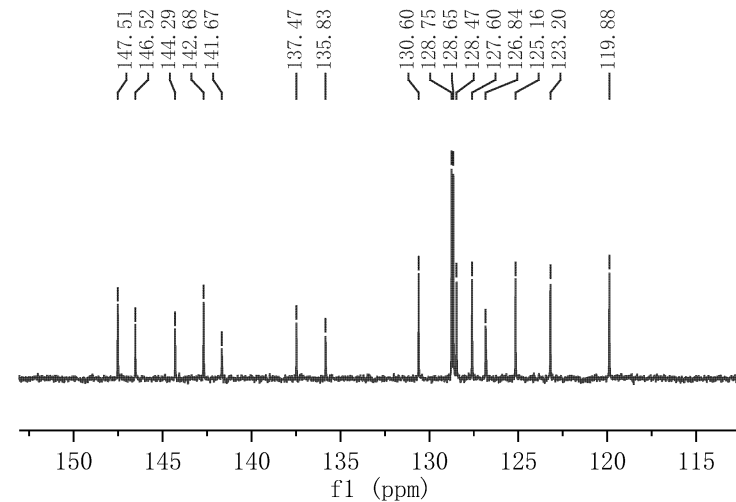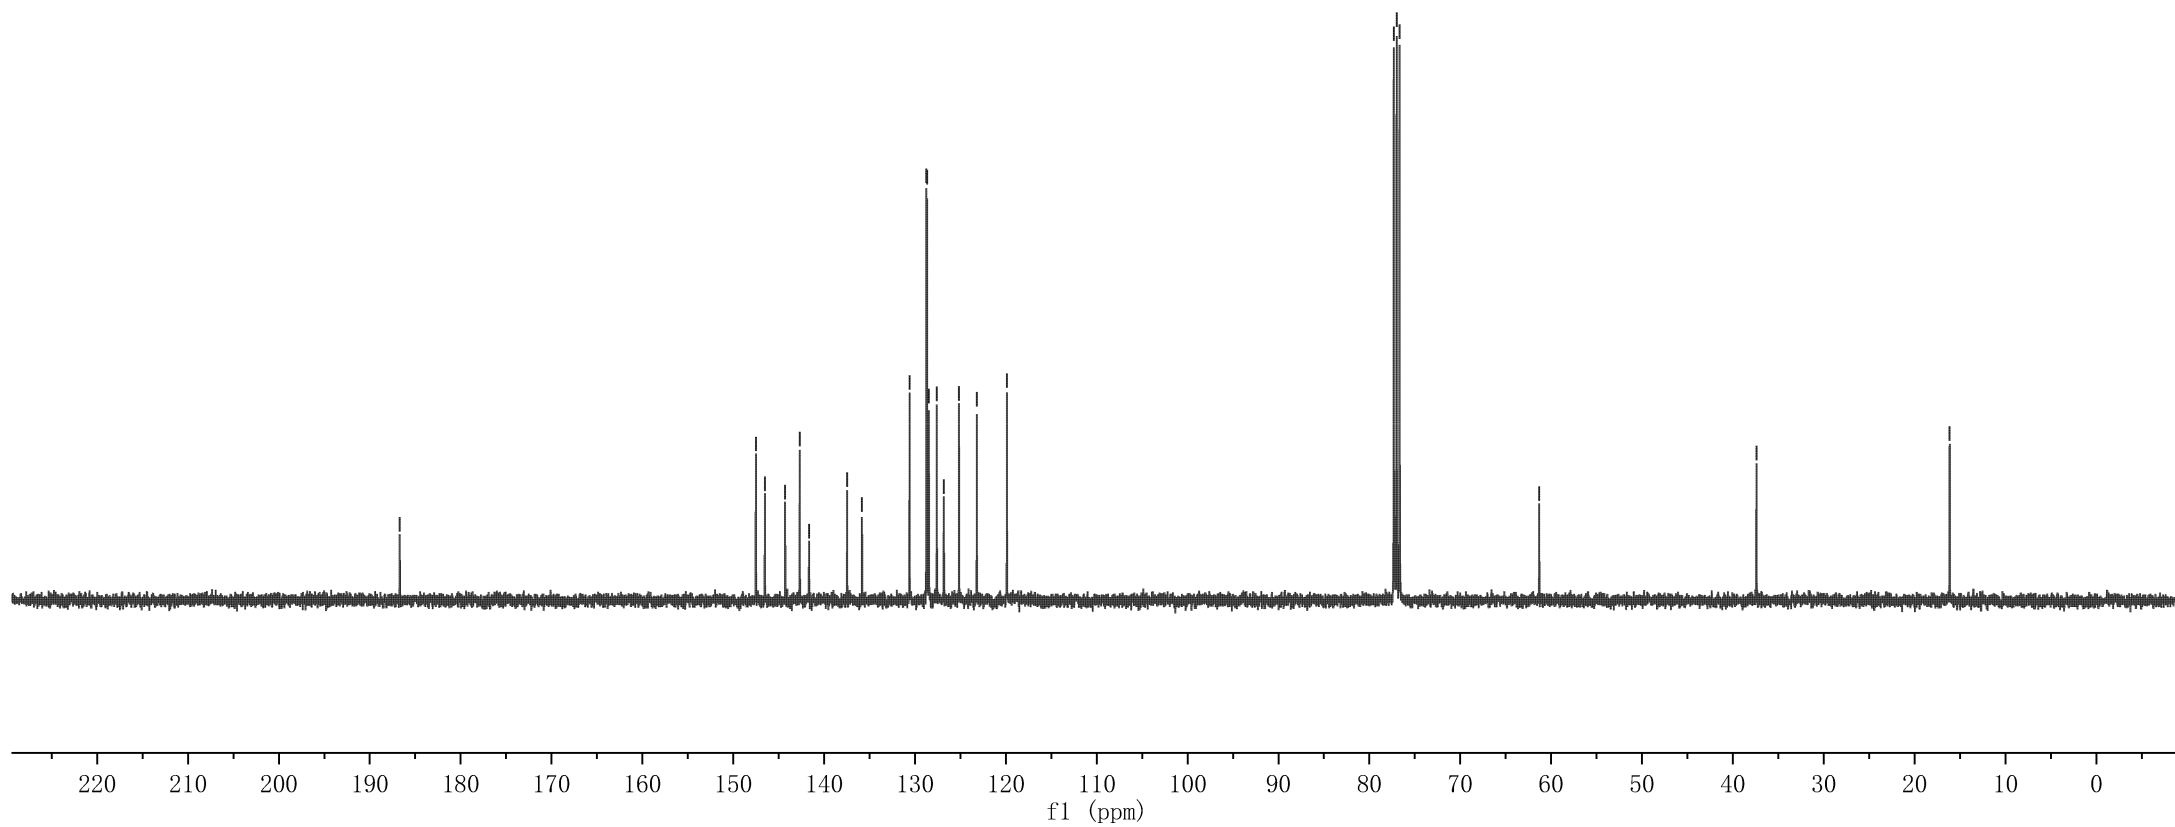

| Parameter                | Value               |
|--------------------------|---------------------|
| 1 Title                  | 3n-H                |
| 2 Origin                 |                     |
| 3 Solvent                | CDC13               |
| 4 Temperature            | 297.6               |
| 5 Number of Scans        | 20                  |
| 6 Acquisition Time       | 4.0002              |
| 7 Acquisition Date       | 2023-02-11T15:50:44 |
| 8 Spectrometer Frequency | 399.90              |
| 9 Spectral Width         | 8012.0              |

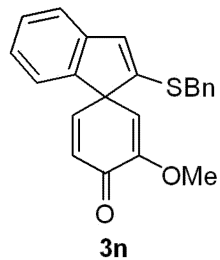

7.375  
7.357  
7.283  
7.251  
7.133  
7.115  
7.097  
7.053  
7.035  
6.681  
6.517  
6.493  
6.284  
6.278  
6.259  
6.254

5.314  
5.308

4.131

3.615

0.000

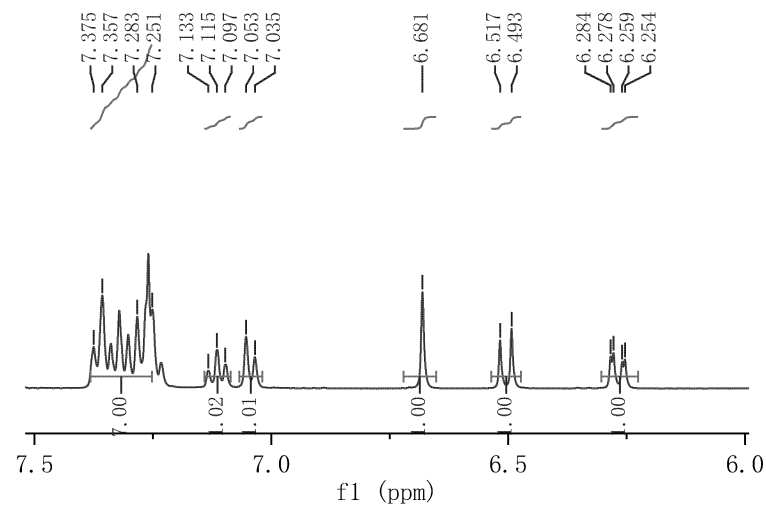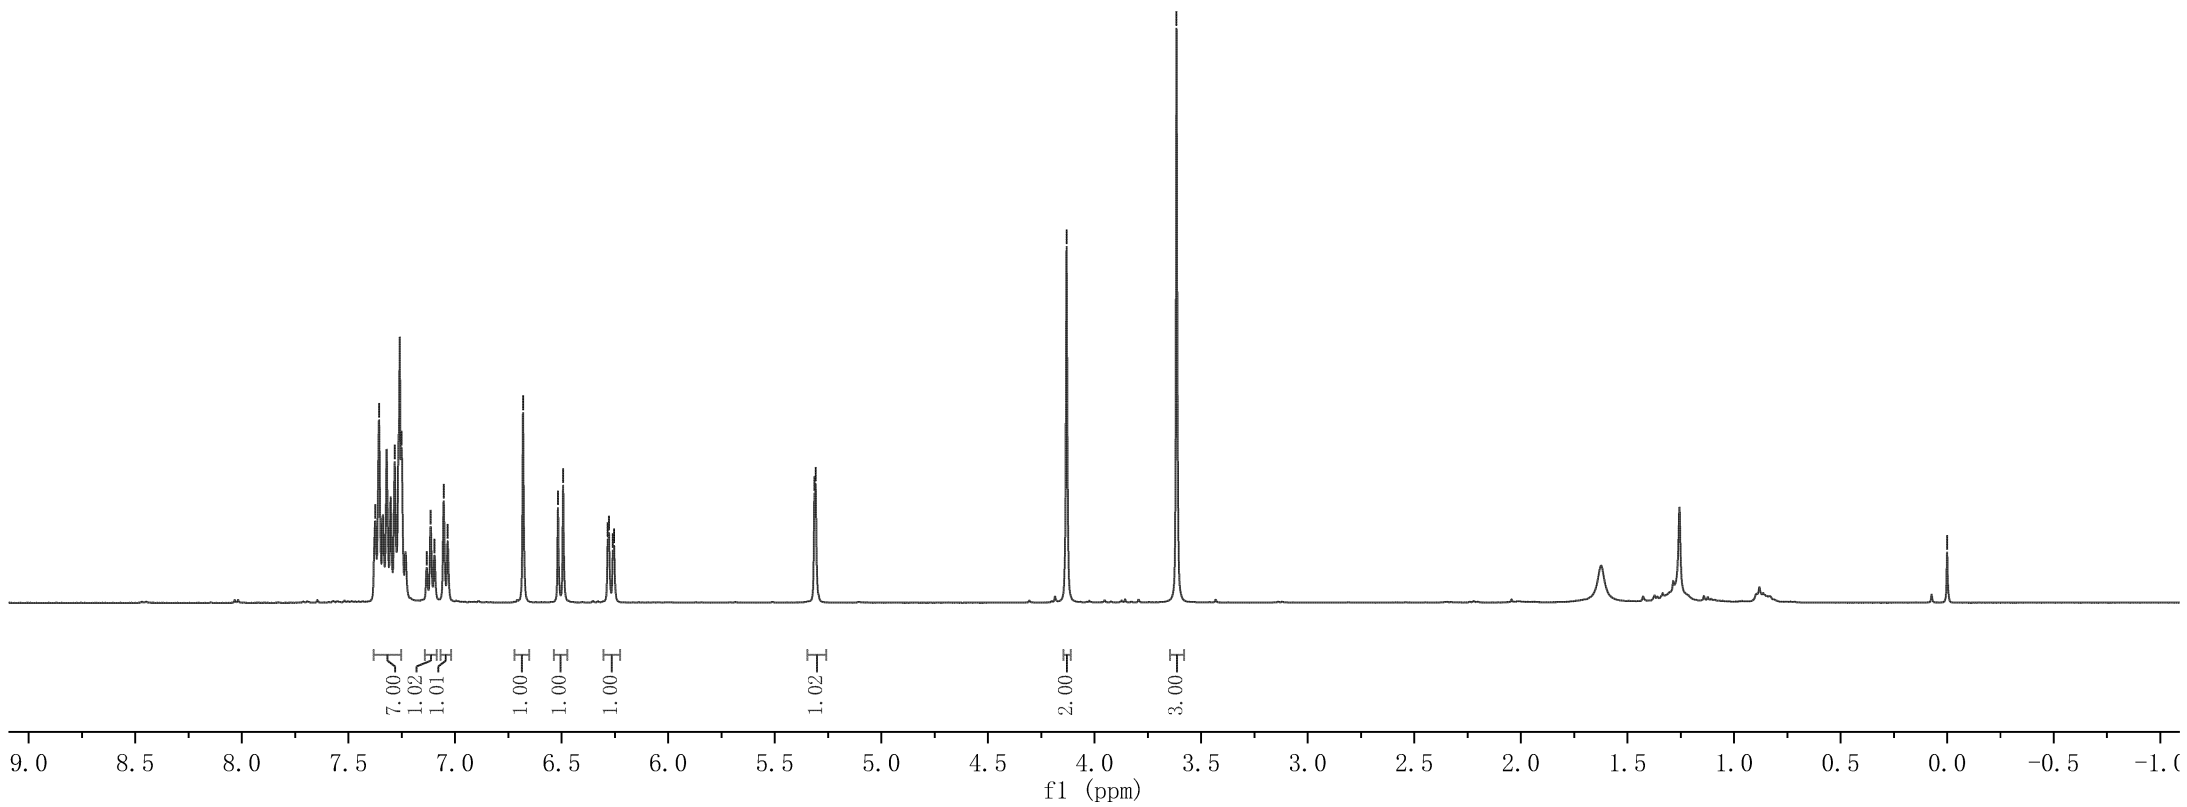

| Parameter                | Value               |
|--------------------------|---------------------|
| 1 Title                  | 3n-C                |
| 2 Origin                 |                     |
| 3 Solvent                | CDC13               |
| 4 Temperature            | 297.5               |
| 5 Number of Scans        | 800                 |
| 6 Acquisition Time       | 1.0000              |
| 7 Acquisition Date       | 2023-02-11T16:20:03 |
| 8 Spectrometer Frequency | 100.56              |
| 9 Spectral Width         | 26041.0             |



181.20

153.09  
148.45  
147.17  
143.96  
142.16  
135.87  
130.32  
128.72  
128.66  
128.54  
127.62  
126.35  
123.13  
114.33

77.32  
77.00  
76.68

61.38

55.06

37.30

153.09

148.45

147.17

143.96

142.16

135.87

130.32

128.72

128.66

128.54

127.62

126.35

125.28

123.13

119.94

114.33

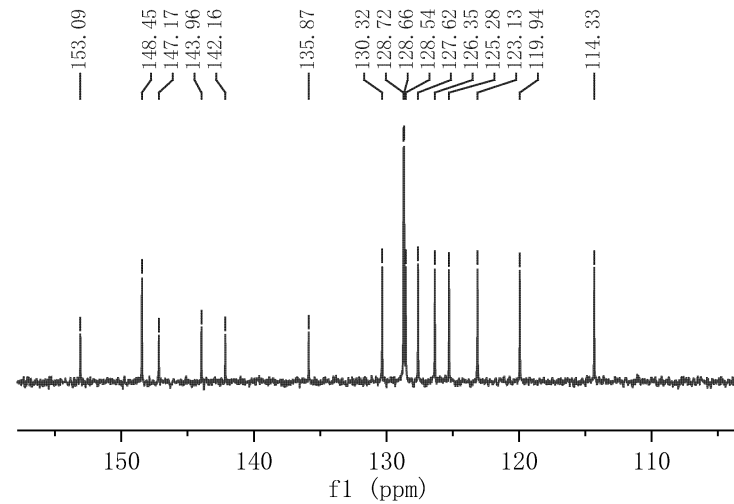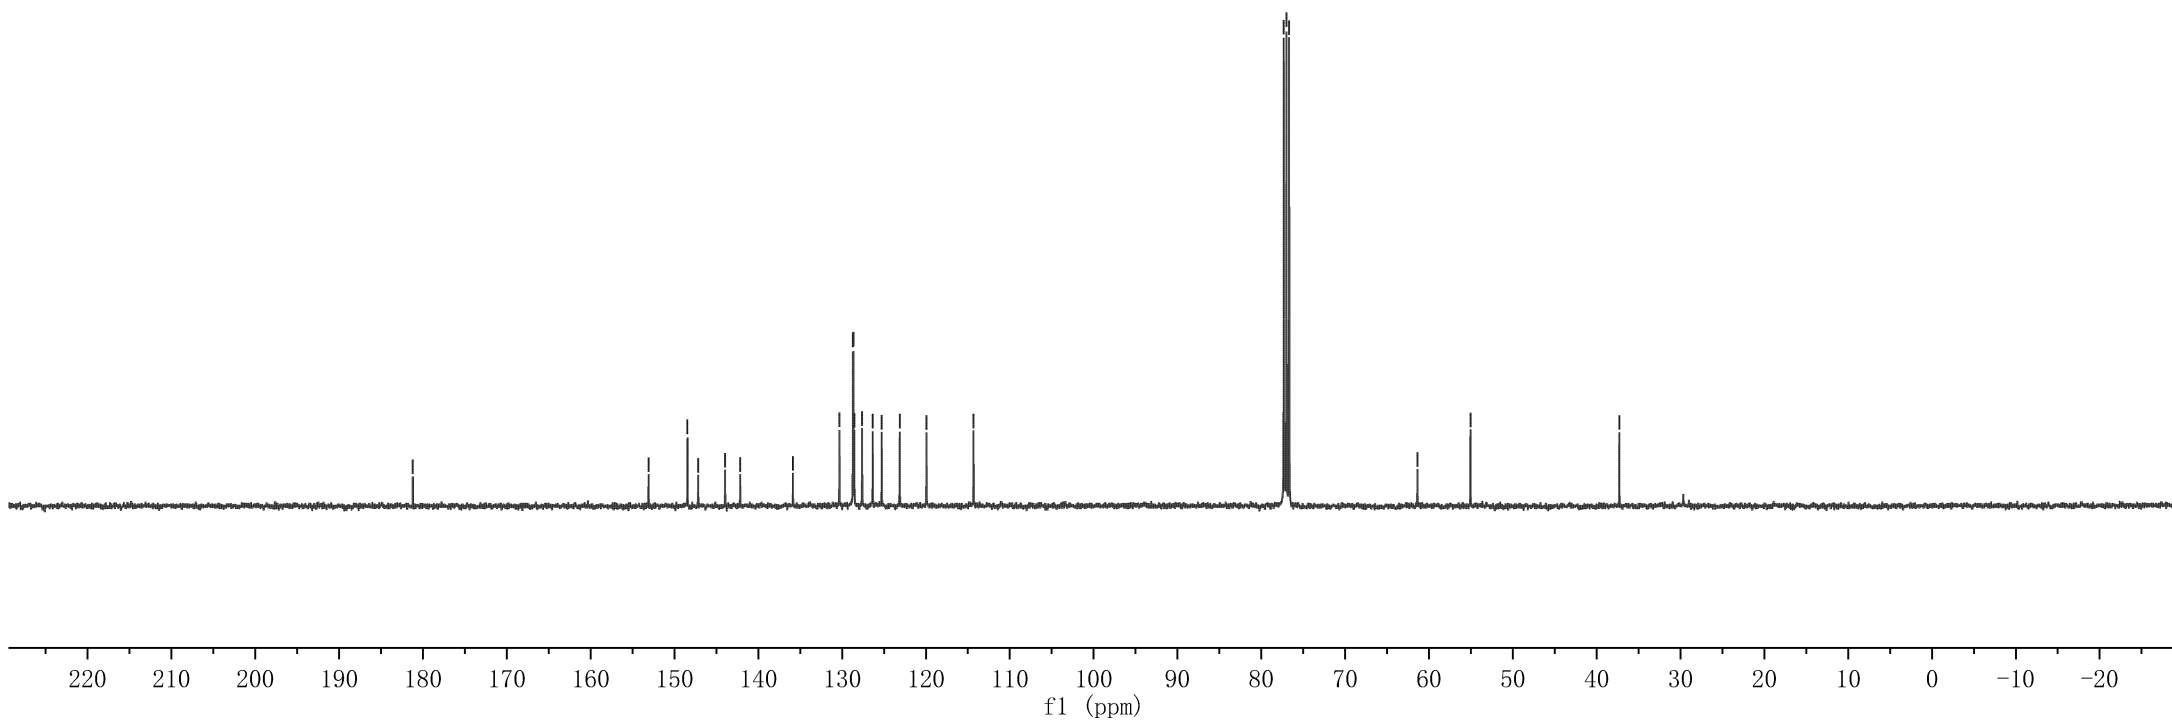

| Parameter                | Value               |
|--------------------------|---------------------|
| 1 Title                  | 30-H-FXY-2-228-H    |
| 2 Origin                 | Bruker BioSpin GmbH |
| 3 Solvent                | CDC13               |
| 4 Temperature            | 298.0               |
| 5 Number of Scans        | 5                   |
| 6 Acquisition Time       | 4.0894              |
| 7 Acquisition Date       | 2021-05-19T15:37:26 |
| 8 Spectrometer Frequency | 400.13              |
| 9 Spectral Width         | 8012.8              |

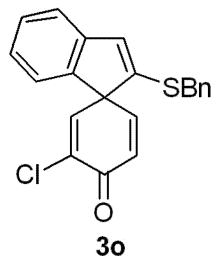

7.367  
7.349  
7.287  
7.242  
7.155  
7.137  
7.119  
7.057  
7.039  
6.736  
6.592  
6.567  
6.476  
6.471  
6.349  
6.343  
6.325  
6.319

4.126

0.000

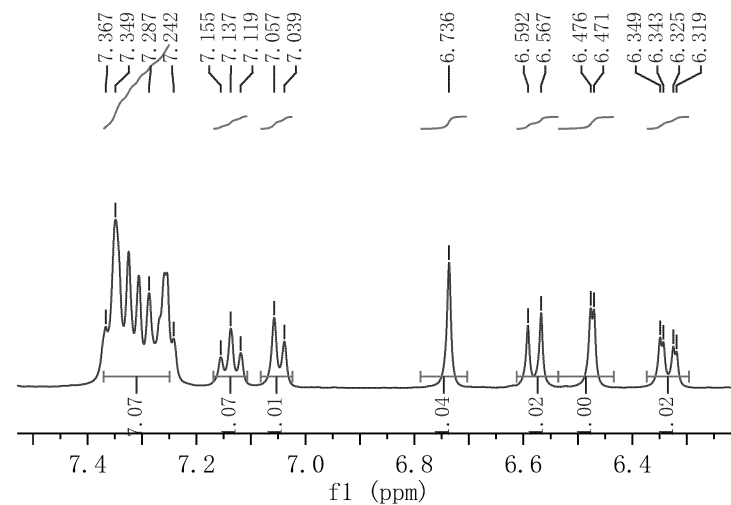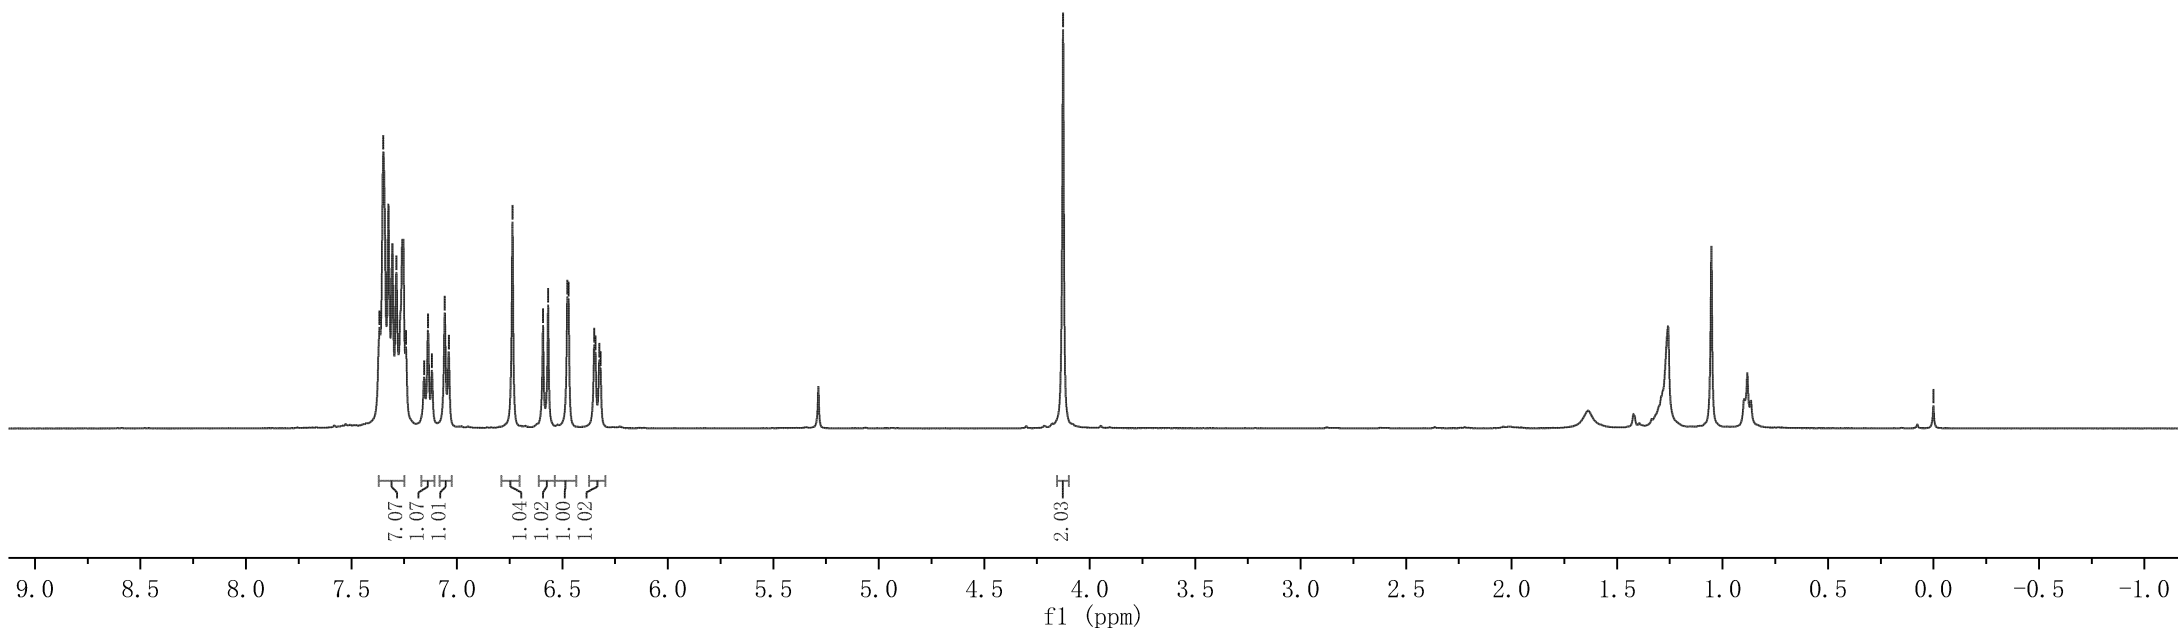



| Parameter                | Value               |
|--------------------------|---------------------|
| 1 Title                  | 30-C-fxy-2-228-C'   |
| 2 Origin                 | Bruker BioSpin GmbH |
| 3 Solvent                | CDC13               |
| 4 Temperature            | 300.0               |
| 5 Number of Scans        | 257                 |
| 6 Acquisition Time       | 1.3631              |
| 7 Acquisition Date       | 2021-05-19T15:43:38 |
| 8 Spectrometer Frequency | 100.61              |
| 9 Spectral Width         | 24038.5             |

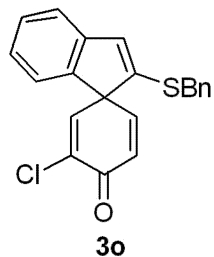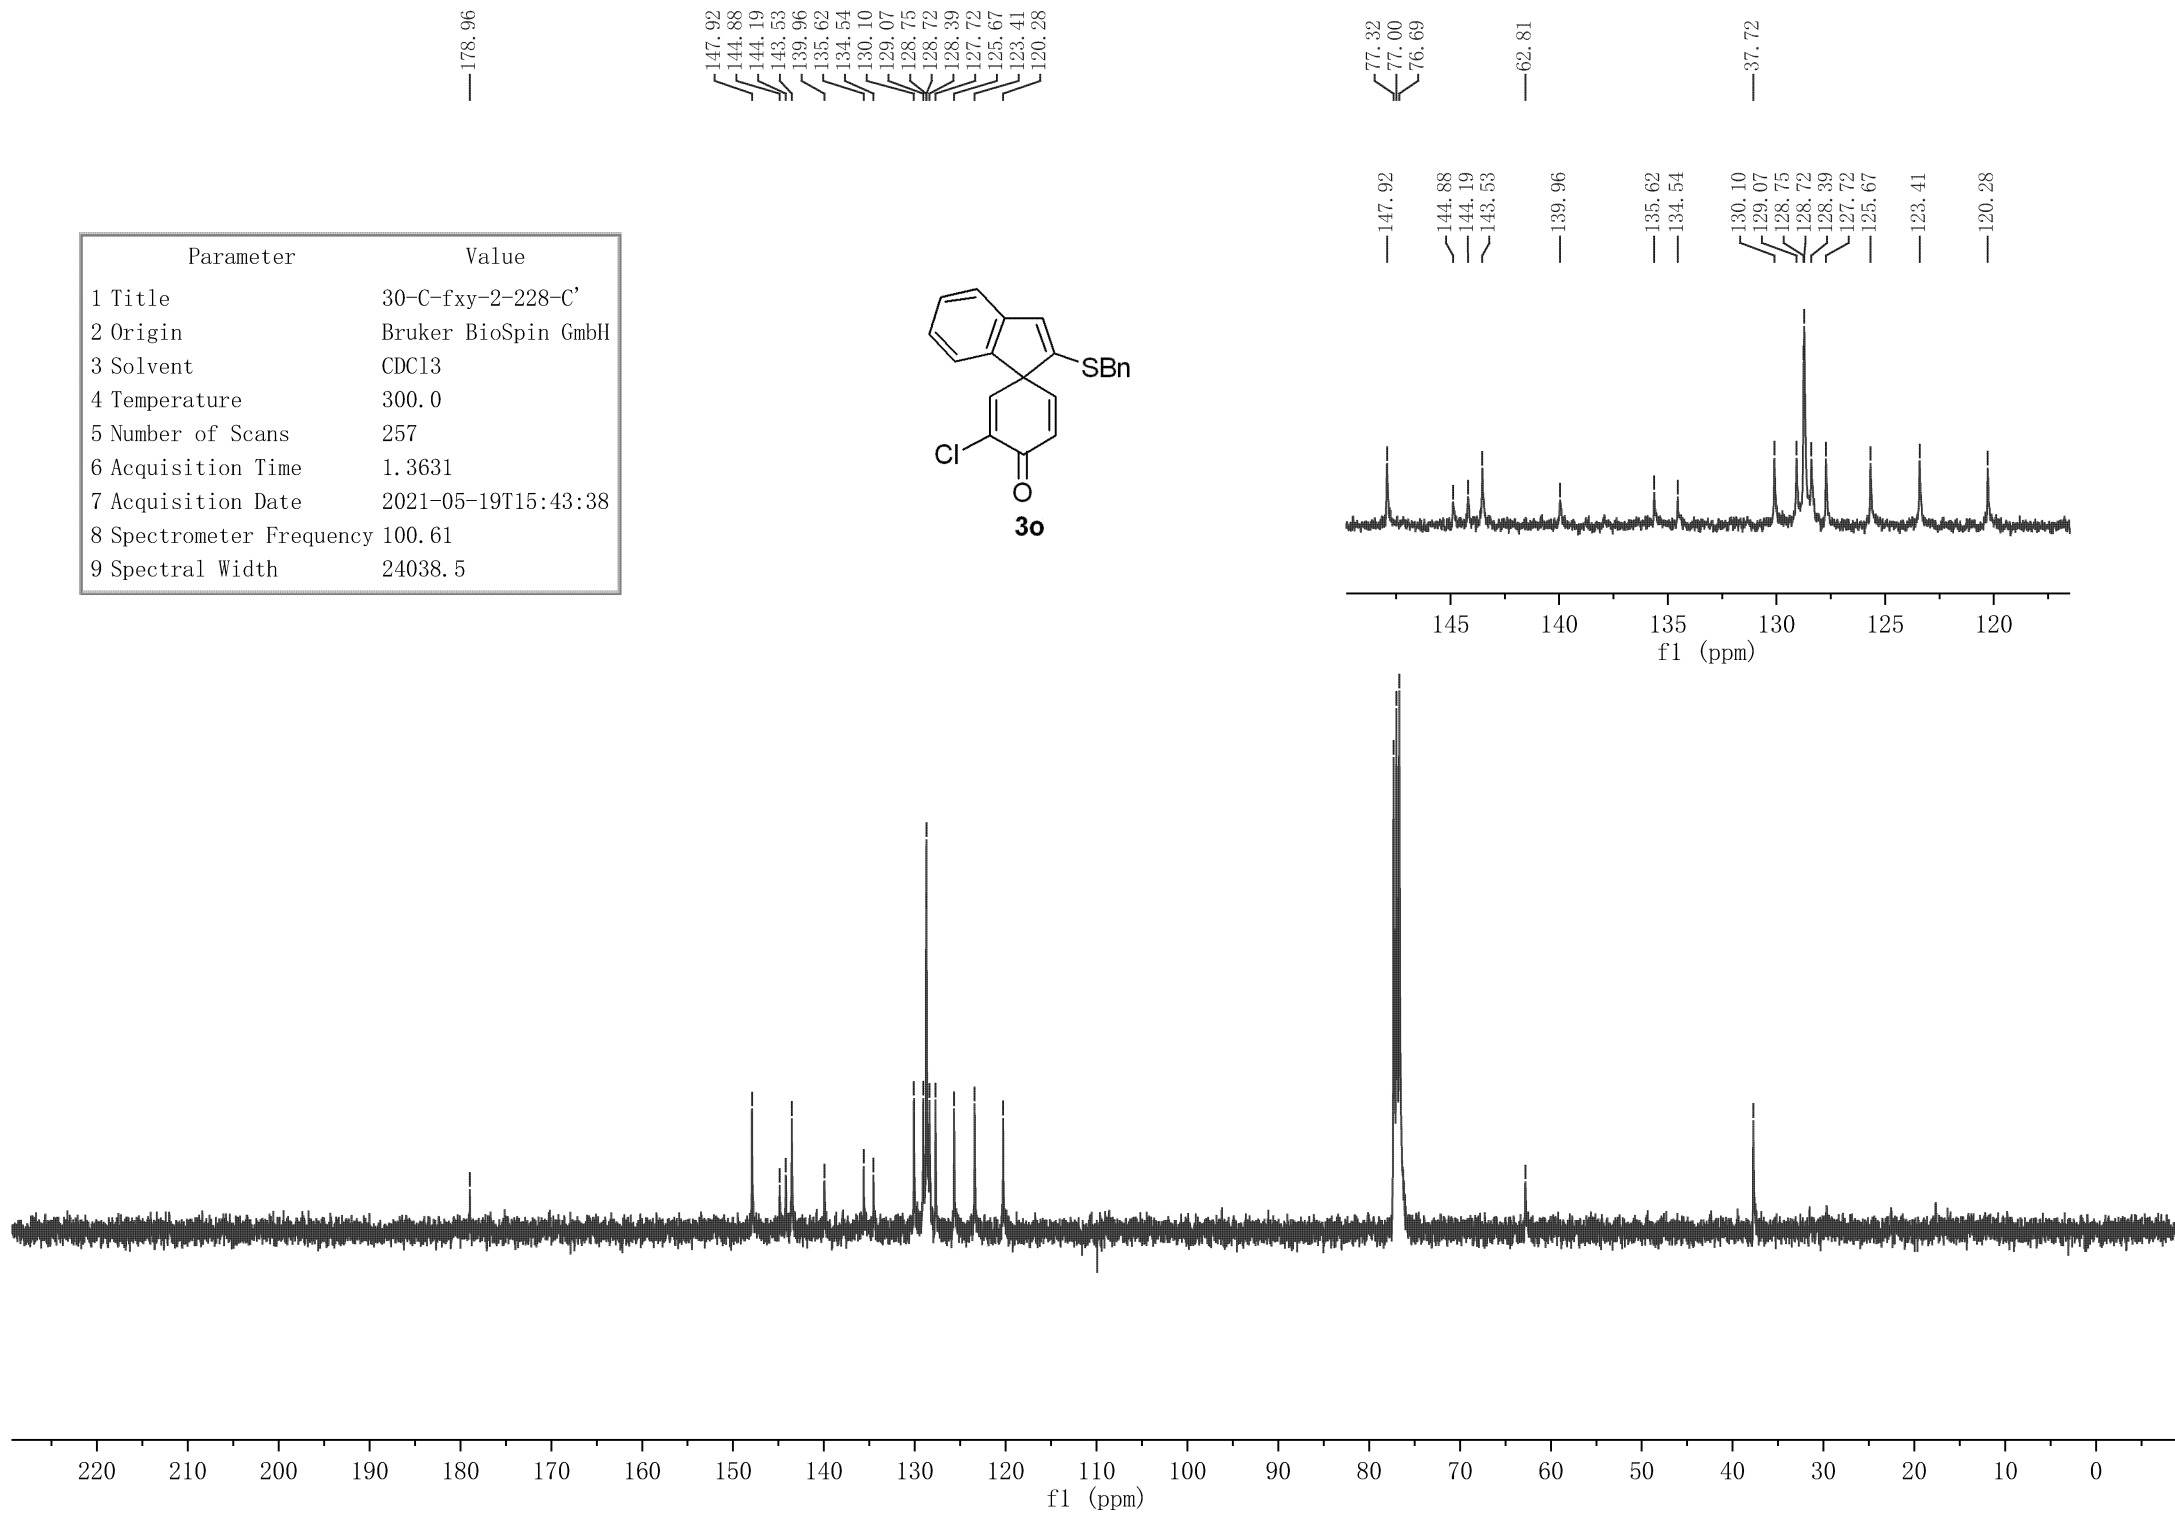

8.576  
8.553  
8.531  
8.510

8.015  
8.009  
7.717  
7.699  
7.680  
7.597  
7.579  
7.562  
7.559  
7.500  
7.482  
7.464  
7.463  
7.293  
7.263  
7.254  
7.230

4.177

1.394  
1.374  
1.356  
1.174  
1.156

0.000

| Parameter                | Value               |
|--------------------------|---------------------|
| 1 Title                  | FXY-11-19           |
| 2 Origin                 |                     |
| 3 Solvent                | CDC13               |
| 4 Temperature            | 295.5               |
| 5 Number of Scans        | 16                  |
| 6 Acquisition Time       |                     |
| 7 Acquisition Date       | 2023-02-15T22:47:39 |
| 8 Spectrometer Frequency | 399.90              |
| 9 Spectral Width         | 8012.0              |

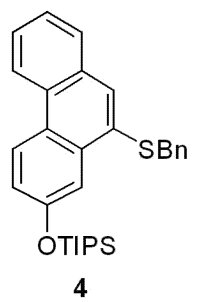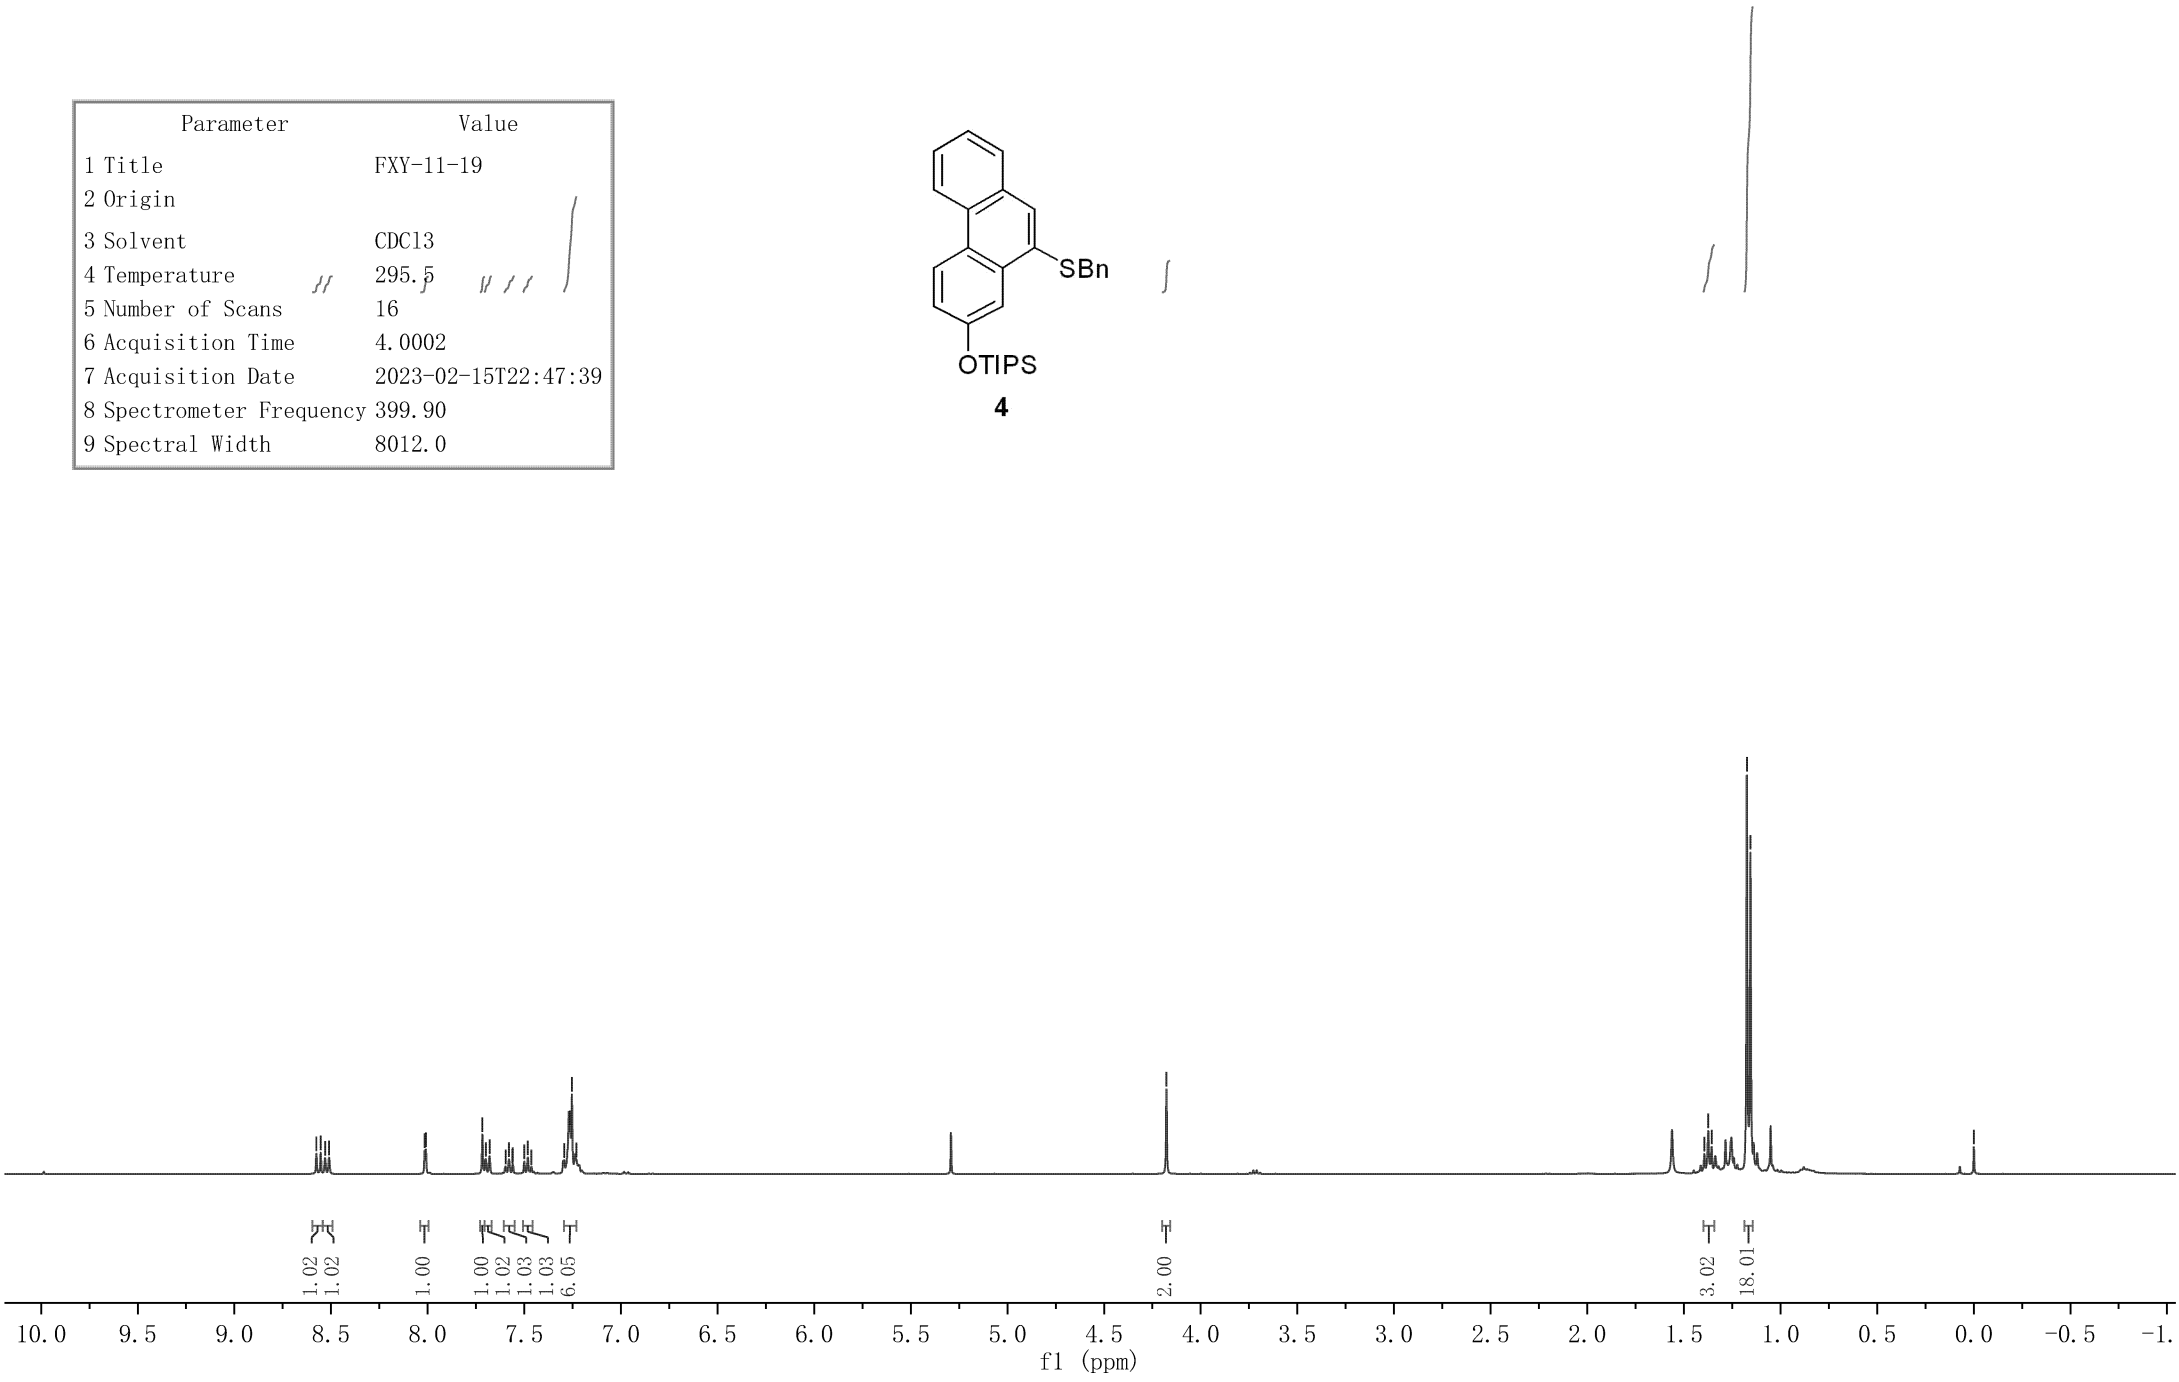

| Parameter                | Value               |
|--------------------------|---------------------|
| 1 Title                  | FXY-11-19           |
| 2 Origin                 |                     |
| 3 Solvent                | CDC13               |
| 4 Temperature            | 295.5               |
| 5 Number of Scans        | 800                 |
| 6 Acquisition Time       | 1.0000              |
| 7 Acquisition Date       | 2023-02-15T23:56:54 |
| 8 Spectrometer Frequency | 100.56              |
| 9 Spectral Width         | 26041.0             |

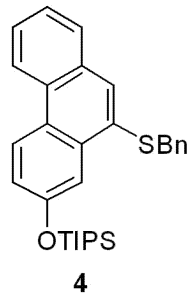

155.26  
137.36  
133.03  
130.83  
130.69  
128.94  
128.45  
128.04  
127.17  
126.80  
125.86  
125.07  
124.57  
122.03  
121.15  
114.27

77.32  
77.00  
76.68

39.18

18.01

12.75

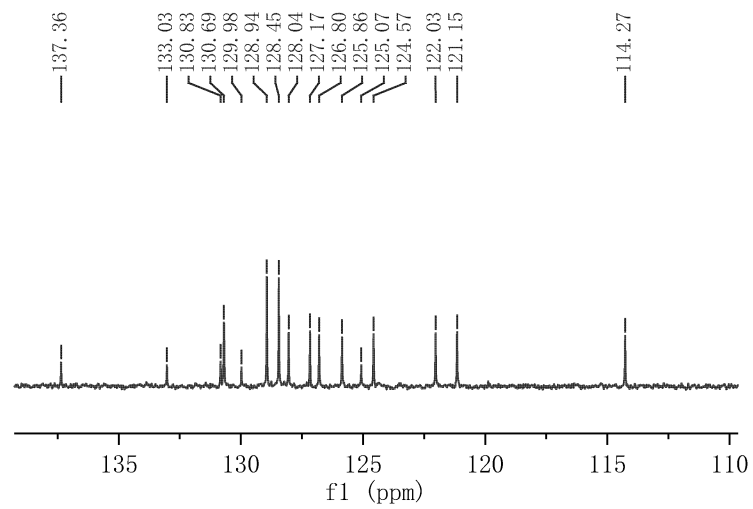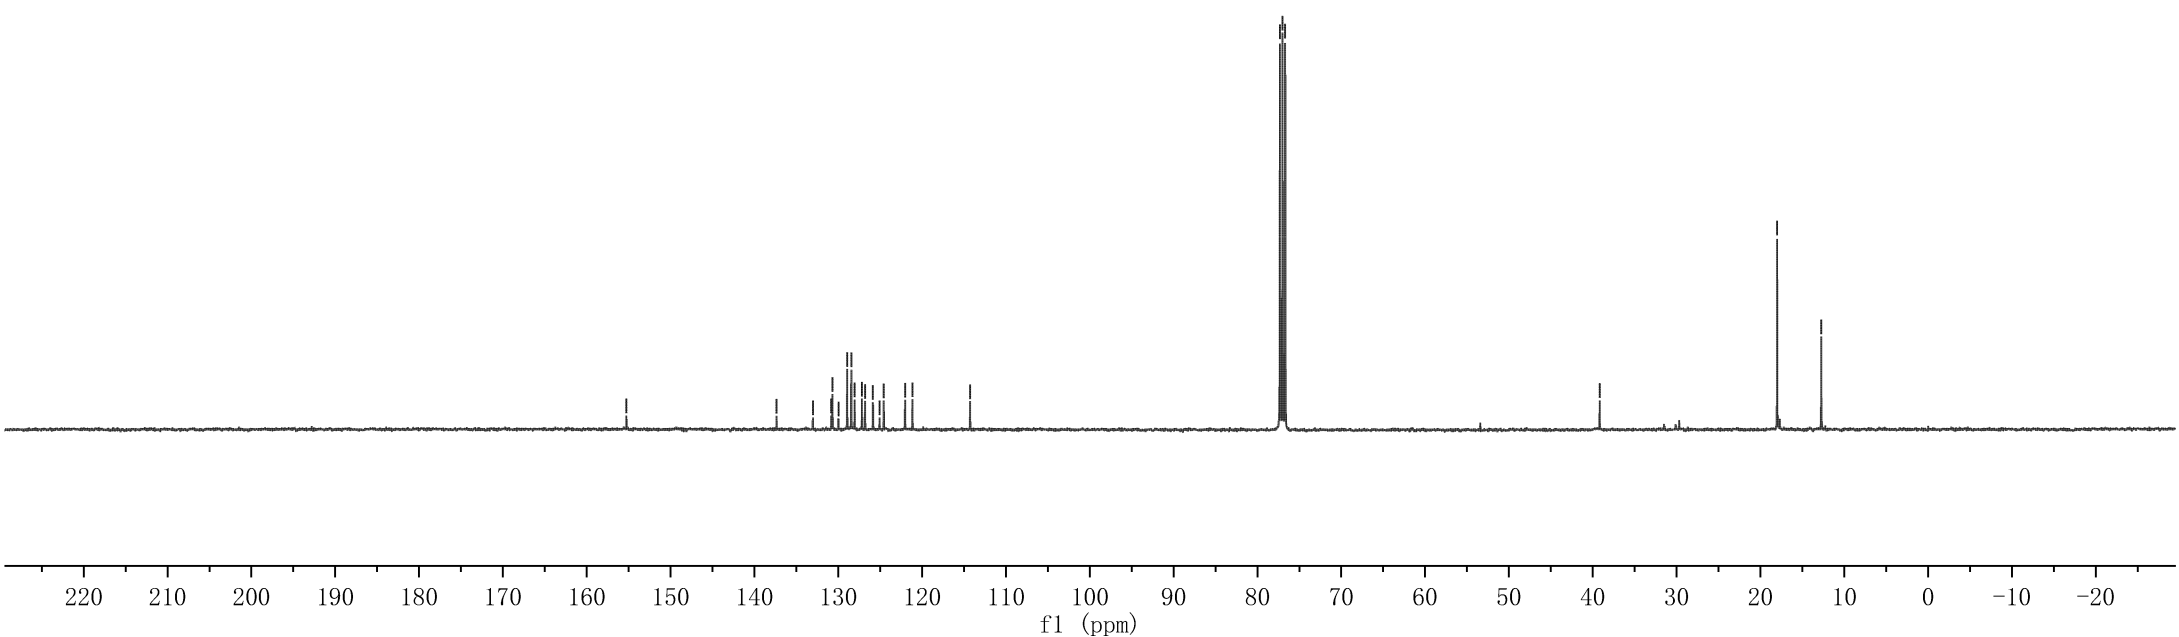

130.70  
128.93  
128.44  
128.04  
127.16  
126.79  
125.85  
124.56  
122.02  
121.14  
— 114.27

| Parameter                | Value               |
|--------------------------|---------------------|
| 1 Title                  | FXY-11-19           |
| 2 Origin                 |                     |
| 3 Solvent                | CDC13               |
| 4 Temperature            | 295.2               |
| 5 Number of Scans        | 200                 |
| 6 Acquisition Time       | 1.0001              |
| 7 Acquisition Date       | 2023-02-16T00:40:07 |
| 8 Spectrometer Frequency | 100.56              |
| 9 Spectral Width         | 18028.0             |

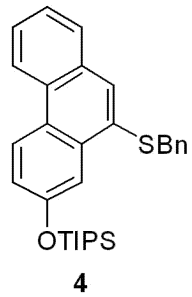

— 39.18

— 18.00

— 12.74

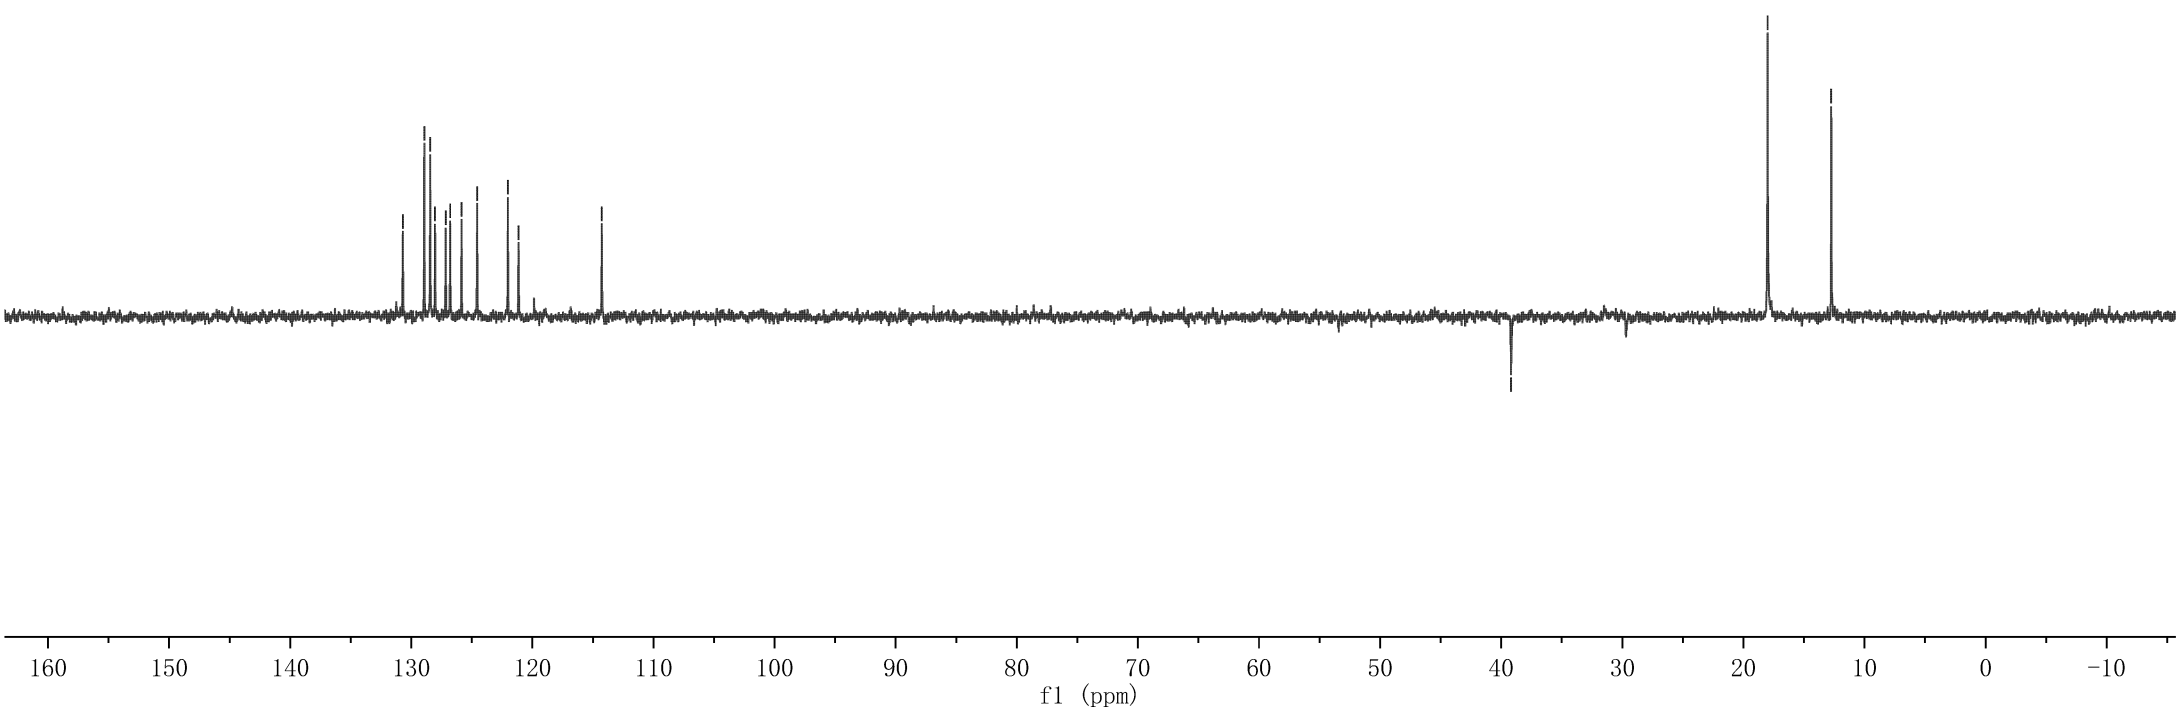

8.663  
8.657  
8.648  
8.640  
8.589  
8.569  
8.501  
8.492  
8.483  
8.477  
7.706  
7.696  
7.687  
7.664  
7.646  
7.630  
7.614  
7.602  
7.587  
7.569  
7.534  
7.497  
7.283  
7.233  
7.215  
7.187

| Parameter                | Value               |
|--------------------------|---------------------|
| 1 Title                  | FXY=12=45=P         |
| 2 Origin                 | Bruker BioSpin GmbH |
| 3 Solvent                | CDCl3               |
| 4 Temperature            | 298.0               |
| 5 Number of Scans        | 3                   |
| 6 Acquisition Time       | 4.0894              |
| 7 Acquisition Date       | 2023-04-27T10:29:54 |
| 8 Spectrometer Frequency | 400.13              |
| 9 Spectral Width         | 8012.8              |

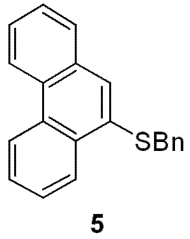

4.184

0.000

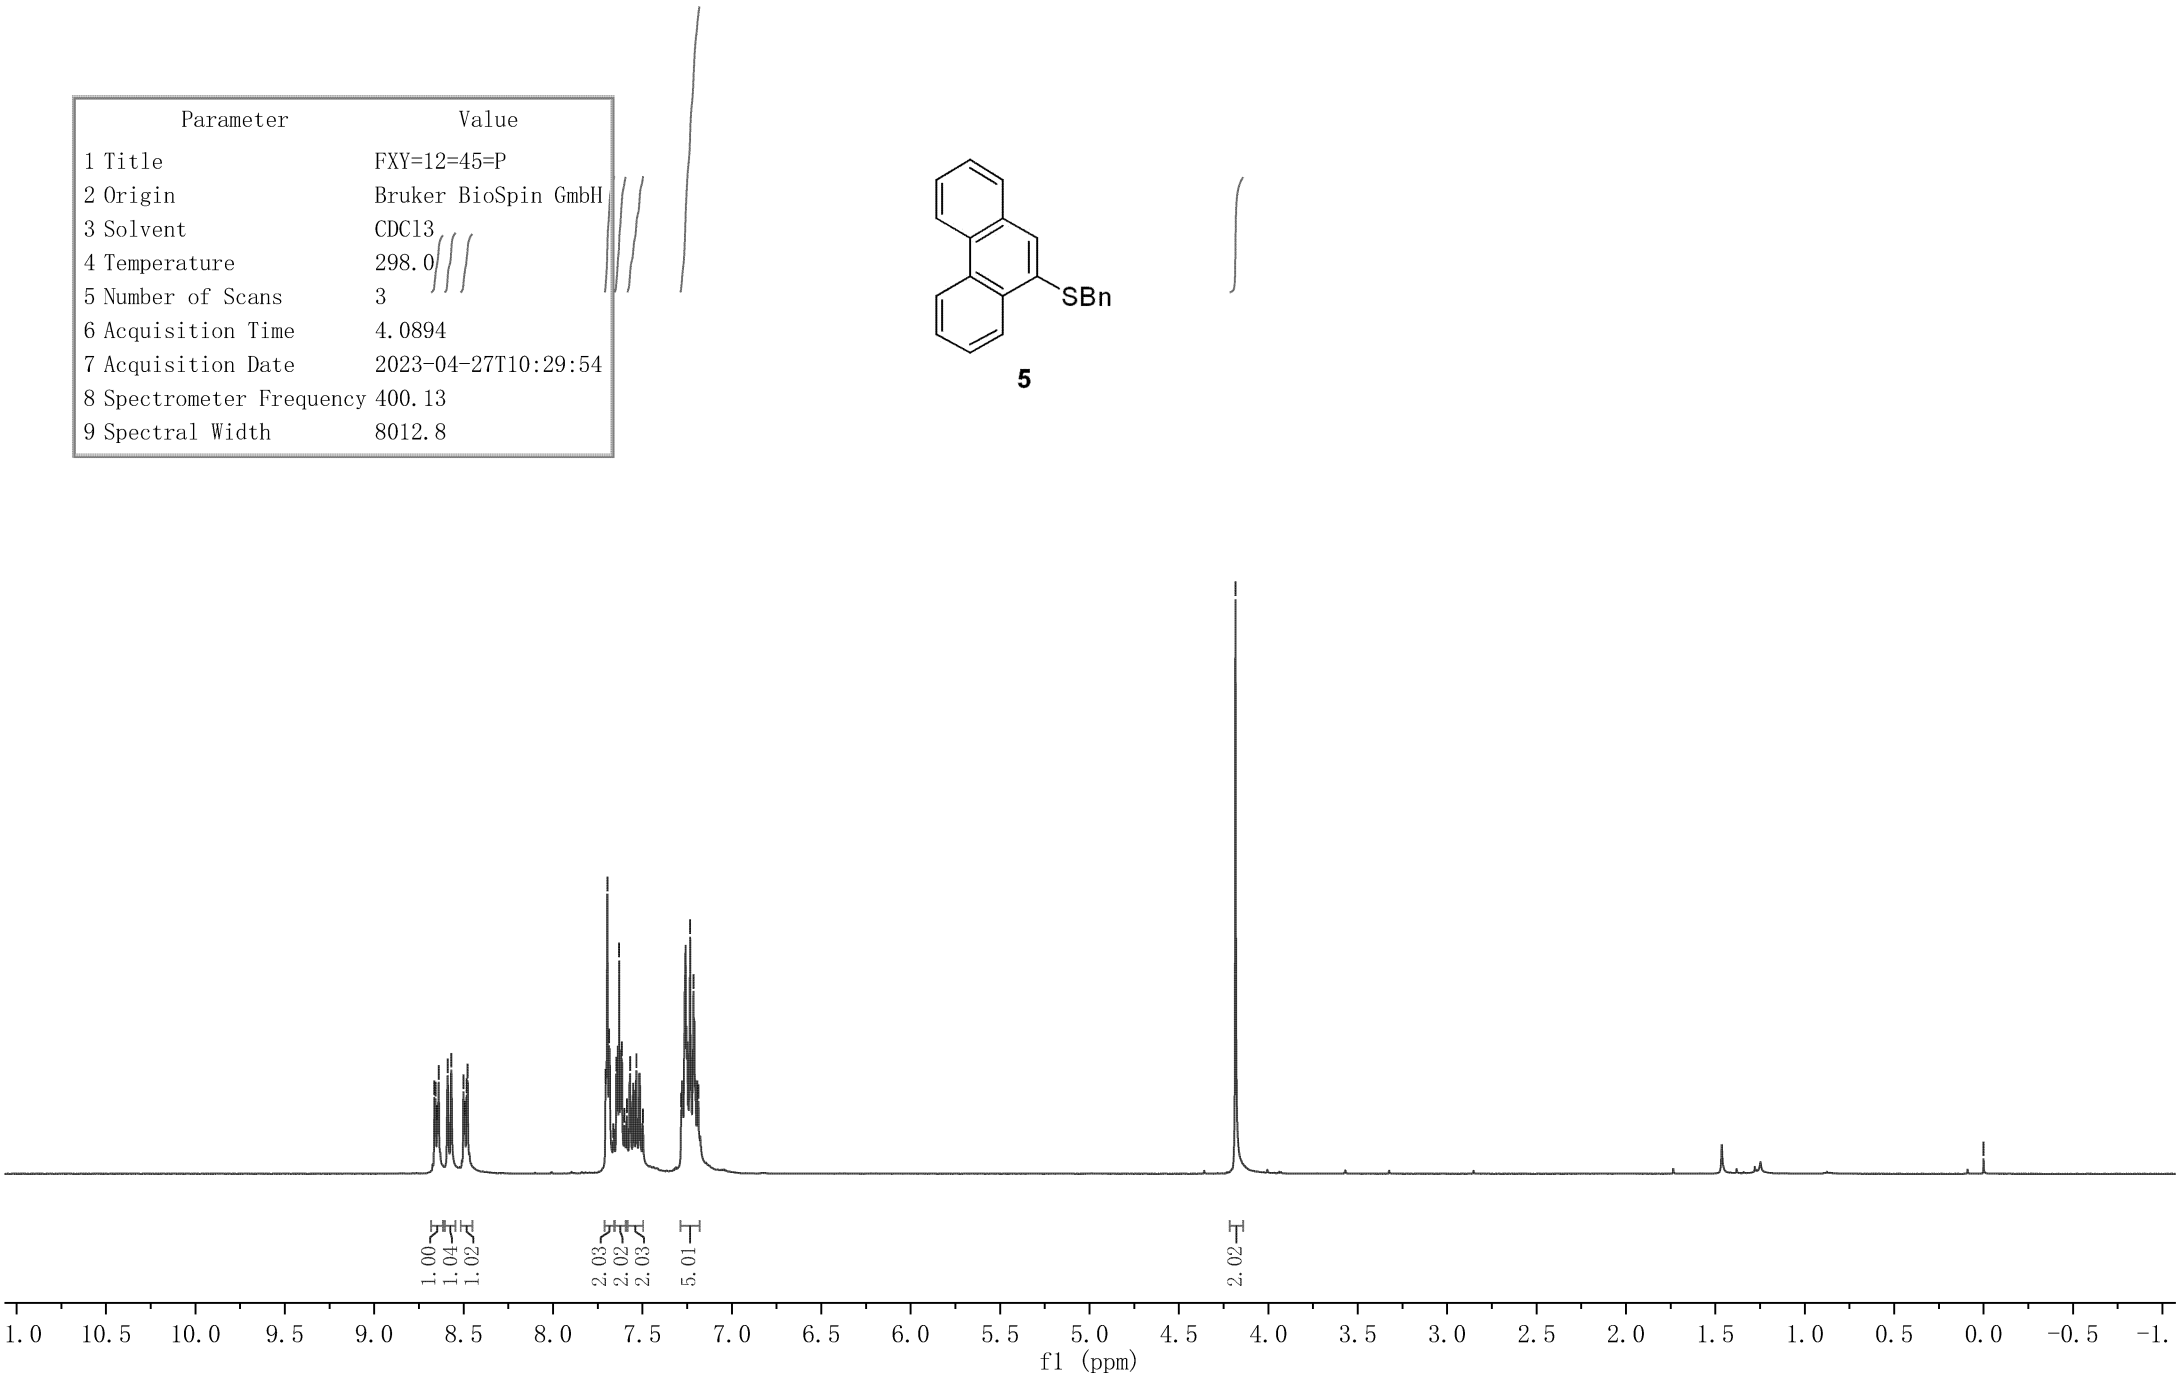

| Parameter                | Value               |
|--------------------------|---------------------|
| 1 Title                  | FXY=12=45=c         |
| 2 Origin                 | Bruker BioSpin GmbH |
| 3 Solvent                | CDC13               |
| 4 Temperature            | 300.0               |
| 5 Number of Scans        | 26                  |
| 6 Acquisition Time       | 1.3631              |
| 7 Acquisition Date       | 2023-04-27T10:30:43 |
| 8 Spectrometer Frequency | 100.61              |
| 9 Spectral Width         | 24038.5             |

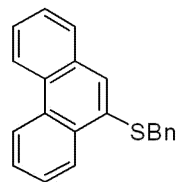

5

137.16  
132.02  
131.67  
131.22  
130.60  
129.68  
129.15  
128.96  
128.46  
127.94  
127.21  
126.85  
126.84  
126.61  
125.64  
123.01  
122.51

77.32  
77.00  
76.68

38.97

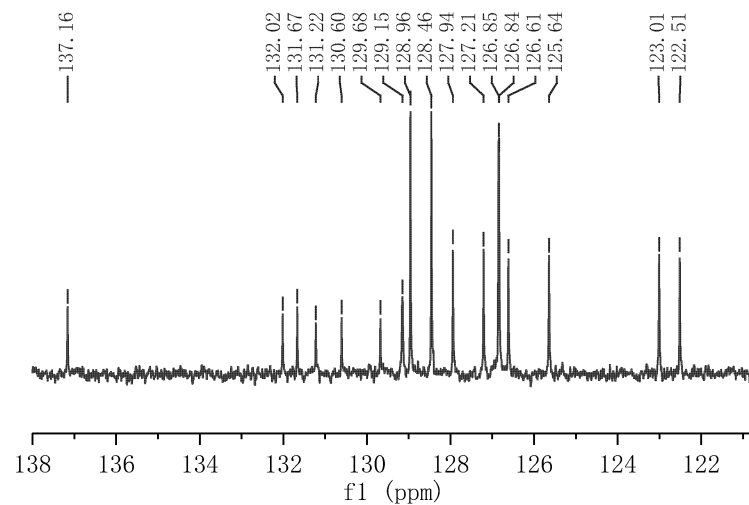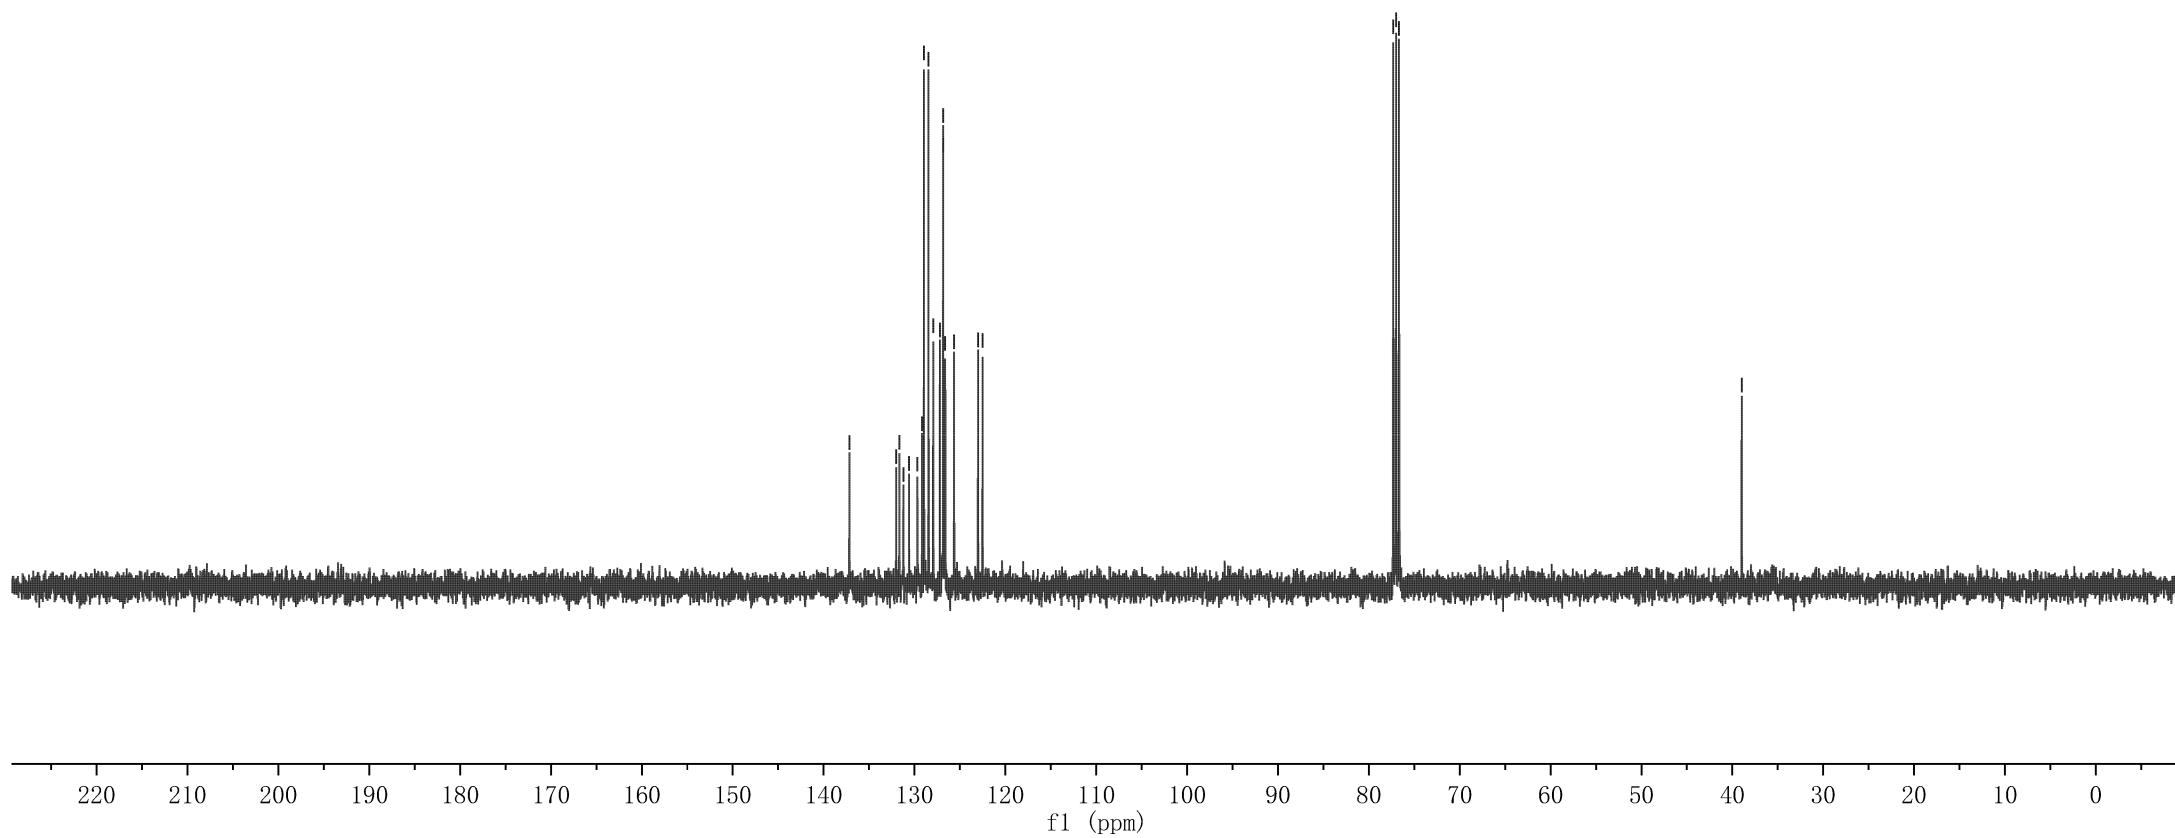

| Parameter                | Value               |
|--------------------------|---------------------|
| 1 Title                  | FXY=12=45=DEPT      |
| 2 Origin                 | Bruker BioSpin GmbH |
| 3 Solvent                | CDCl3               |
| 4 Temperature            | 300.0               |
| 5 Number of Scans        | 8                   |
| 6 Acquisition Time       | 1.3631              |
| 7 Acquisition Date       | 2023-04-27T10:32:45 |
| 8 Spectrometer Frequency | 100.61              |
| 9 Spectral Width         | 24038.5             |

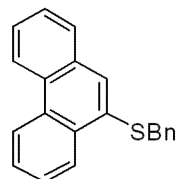

5

129.16  
128.95  
128.45  
127.94  
127.20  
126.84  
126.83  
126.61  
125.64  
123.00  
122.51

—38.97

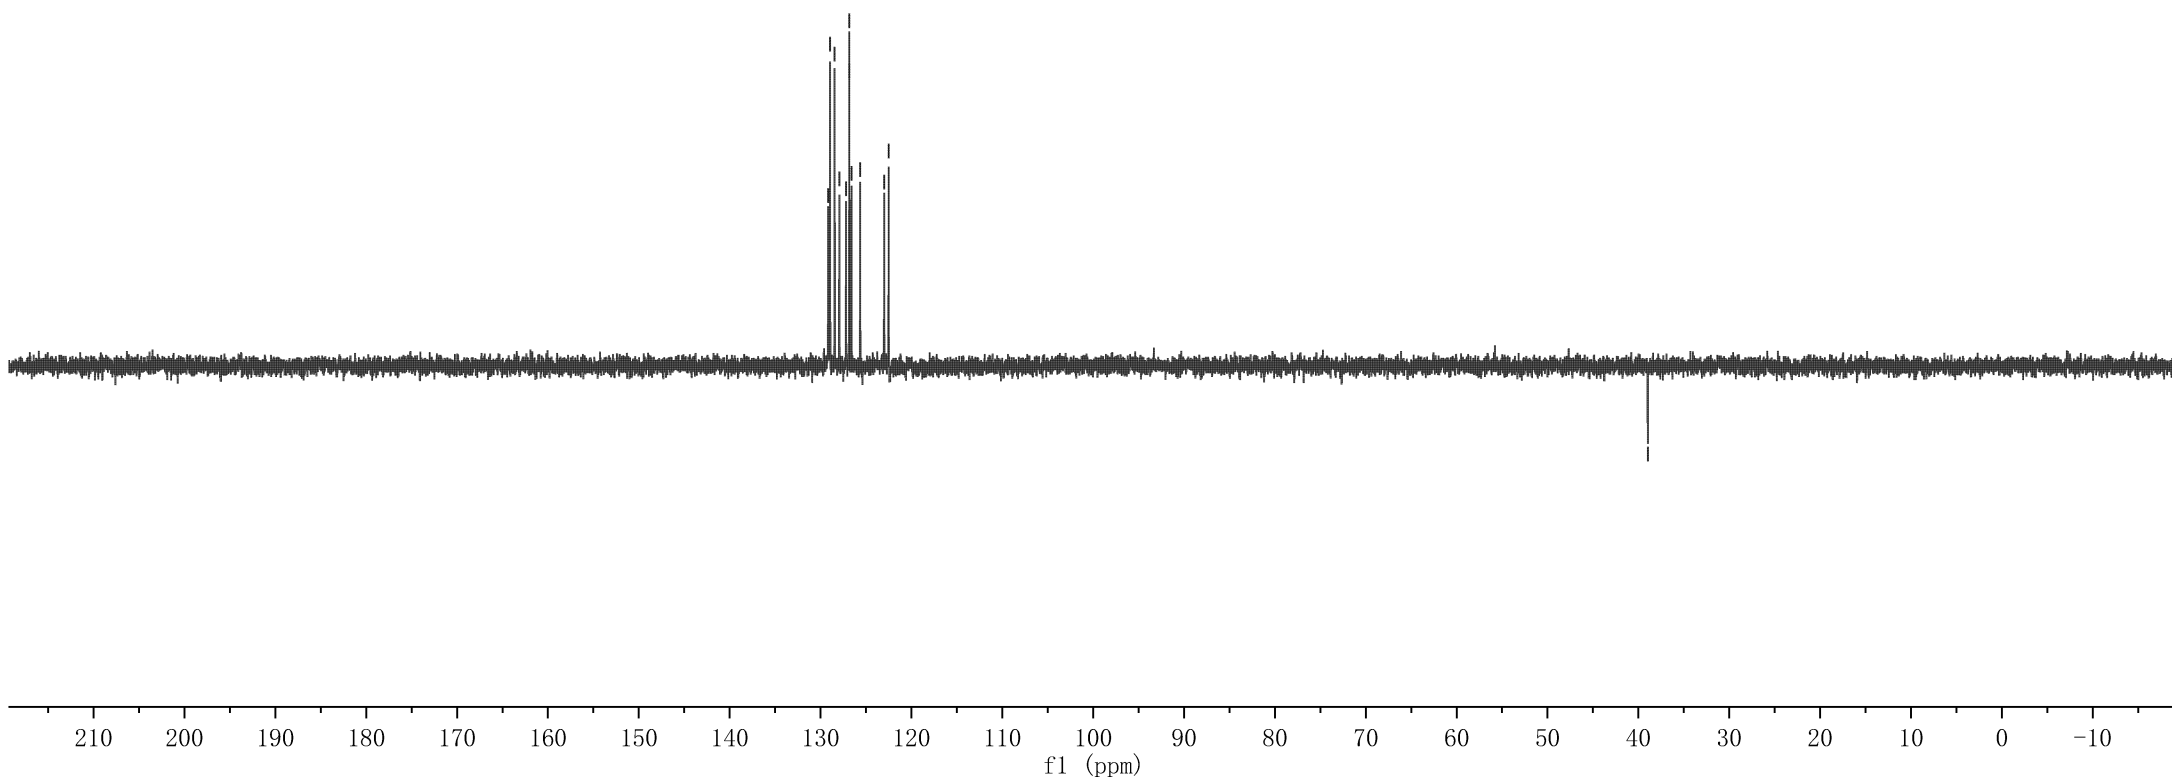

| Parameter                | Value               |
|--------------------------|---------------------|
| 1 Title                  | fxv-12447           |
| 2 Origin                 | Bruker BioSpin GmbH |
| 3 Solvent                | CDC13               |
| 4 Temperature            | 298.0               |
| 5 Number of Scans        | 7                   |
| 6 Acquisition Time       | 4.0894              |
| 7 Acquisition Date       | 2023-04-26T22:55:05 |
| 8 Spectrometer Frequency | 400.13              |
| 9 Spectral Width         | 8012.8              |

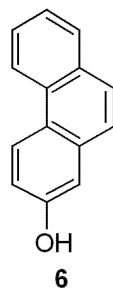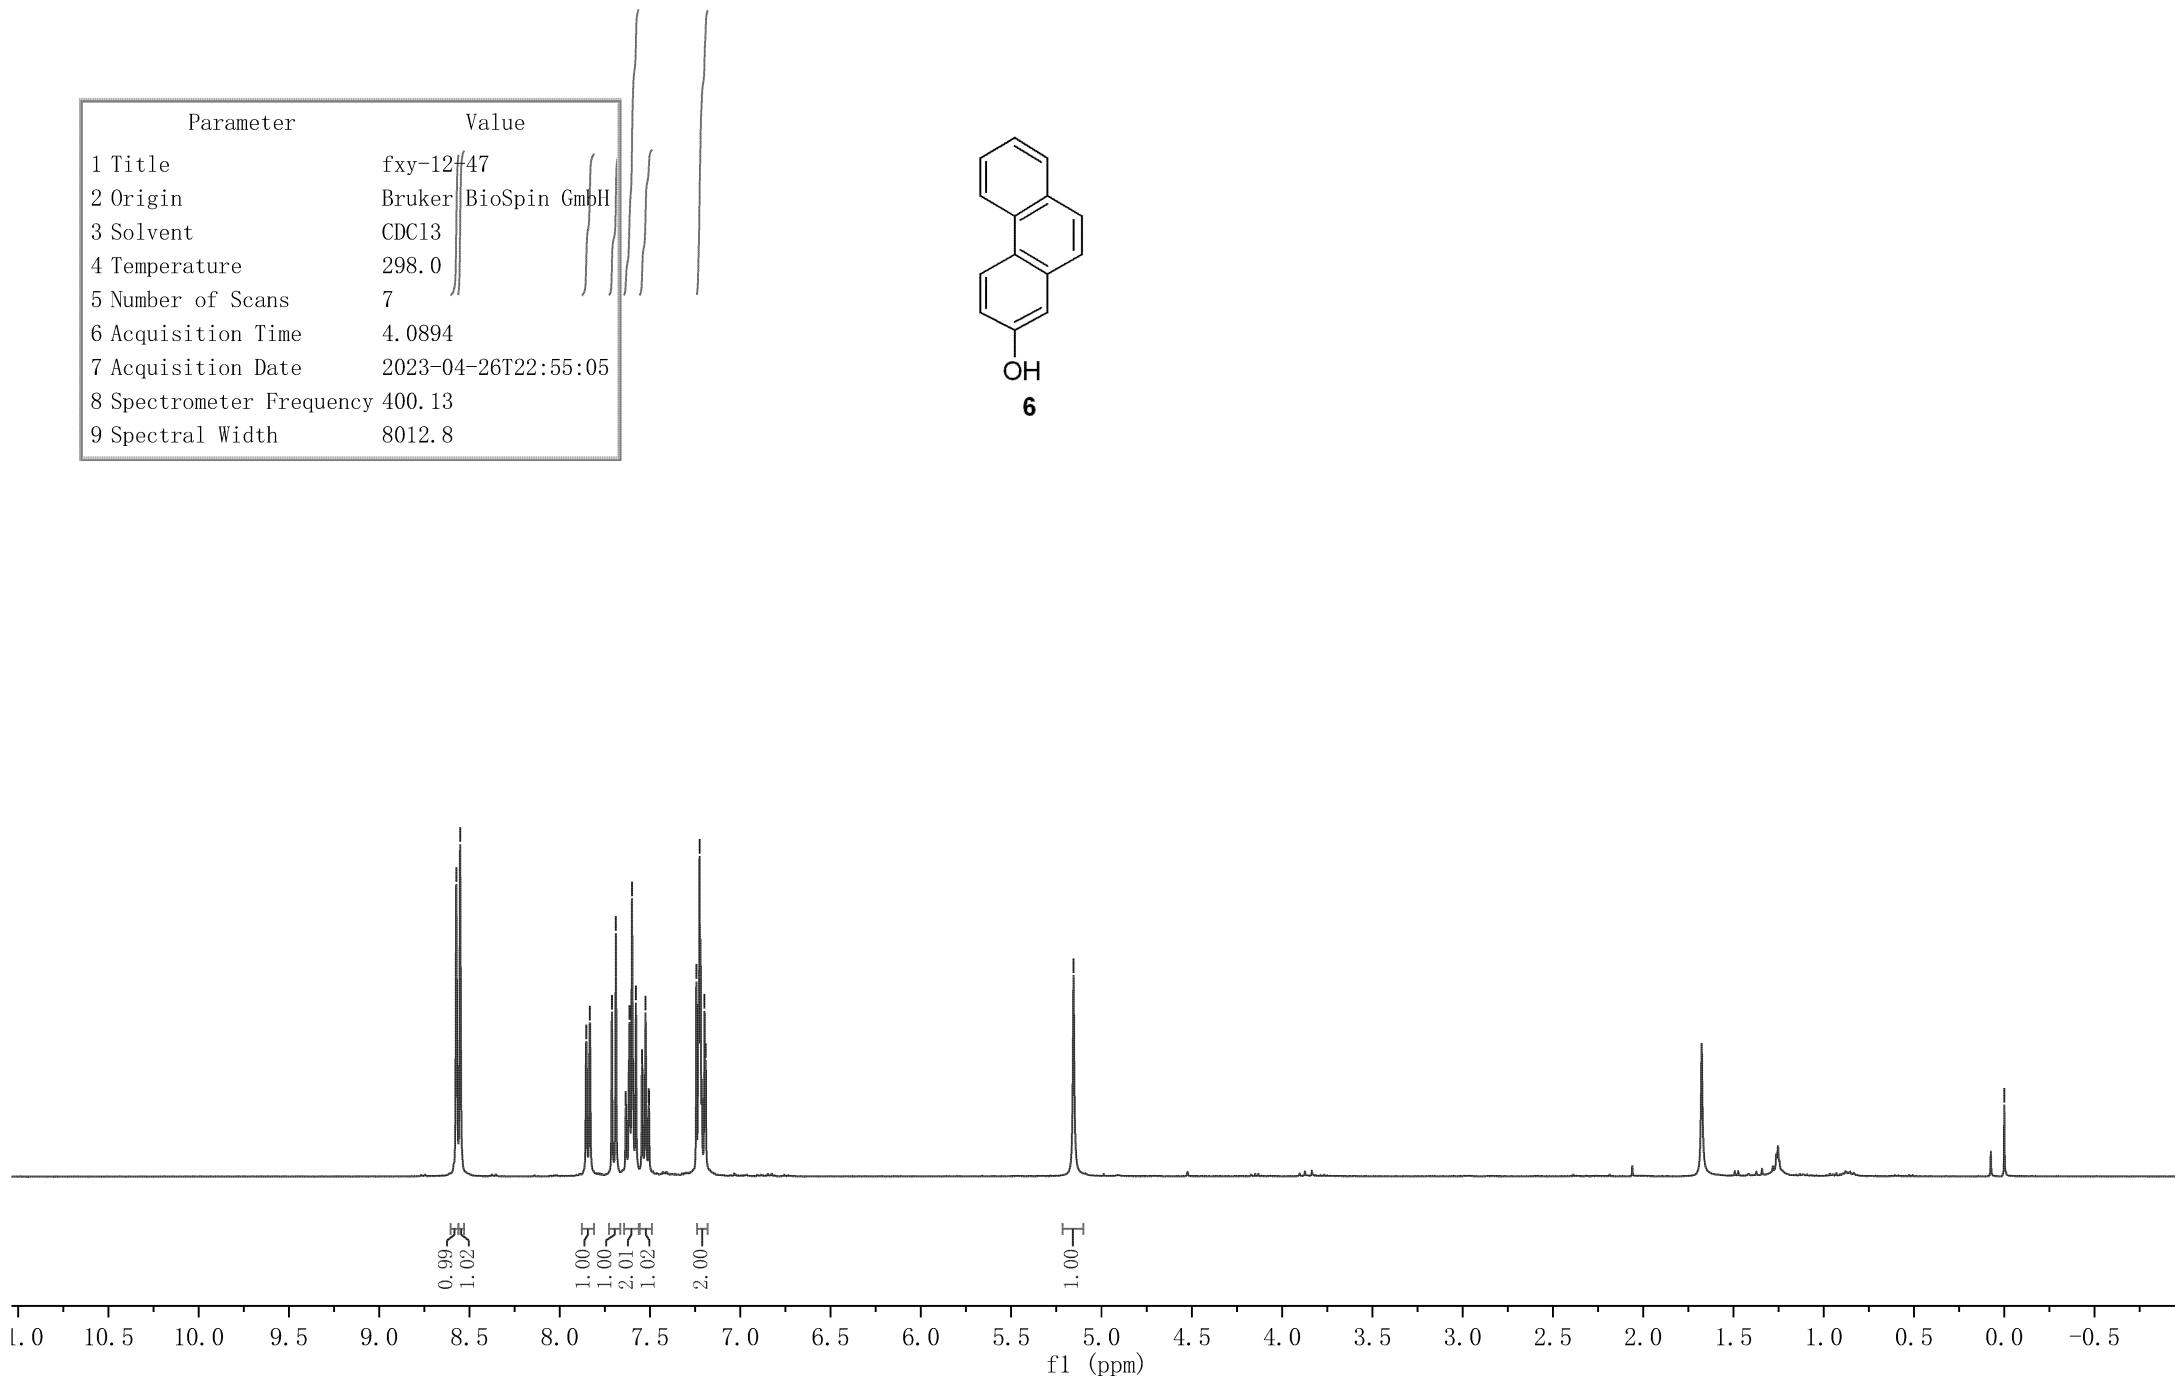



| Parameter                | Value               |
|--------------------------|---------------------|
| 1 Title                  | fxv-12-47-C         |
| 2 Origin                 | Bruker BioSpin GmbH |
| 3 Solvent                | CDCl3               |
| 4 Temperature            | 300.0               |
| 5 Number of Scans        | 127                 |
| 6 Acquisition Time       | 1.3631              |
| 7 Acquisition Date       | 2023-04-26T22:56:09 |
| 8 Spectrometer Frequency | 100.61              |
| 9 Spectral Width         | 24038.5             |

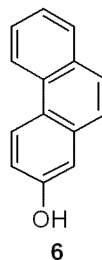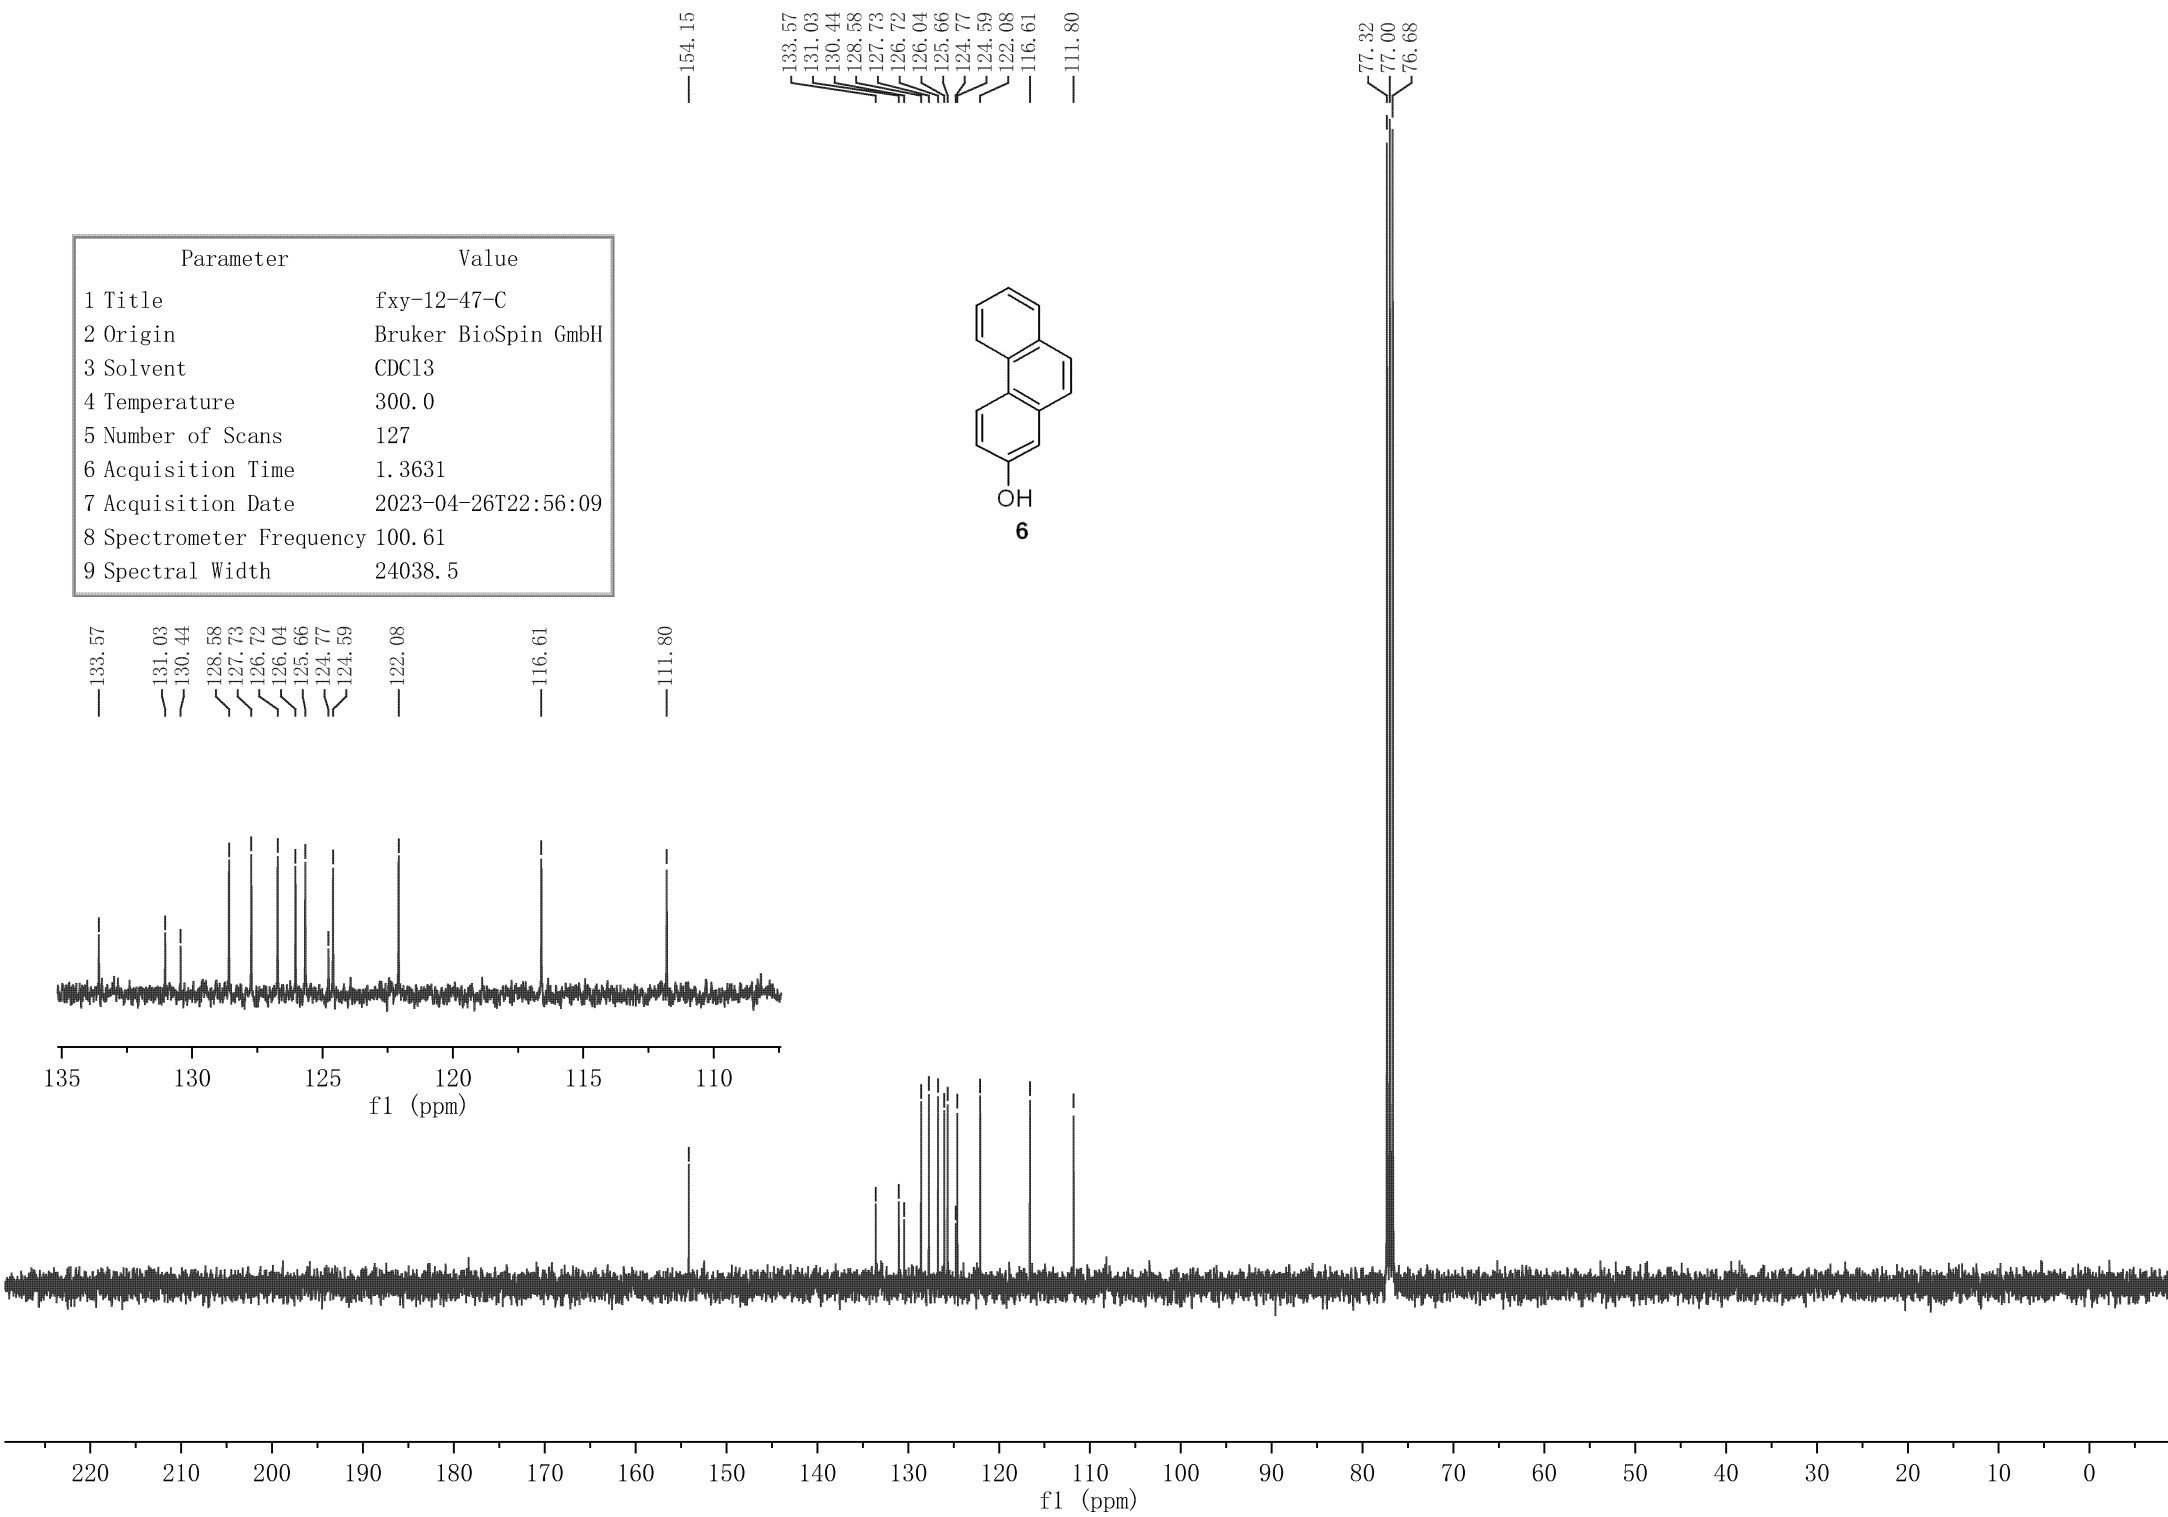

| Parameter                | Value               |
|--------------------------|---------------------|
| 1 Title                  | fxv-12-47-DEPT      |
| 2 Origin                 | Bruker BioSpin GmbH |
| 3 Solvent                | CDCl3               |
| 4 Temperature            | 300.0               |
| 5 Number of Scans        | 21                  |
| 6 Acquisition Time       | 1.3631              |
| 7 Acquisition Date       | 2023-04-26T23:04:28 |
| 8 Spectrometer Frequency | 100.61              |
| 9 Spectral Width         | 24038.5             |

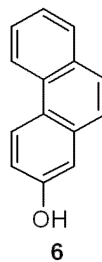

128.58  
127.73  
126.72  
126.03  
125.66  
124.59  
122.08  
116.61  
111.80

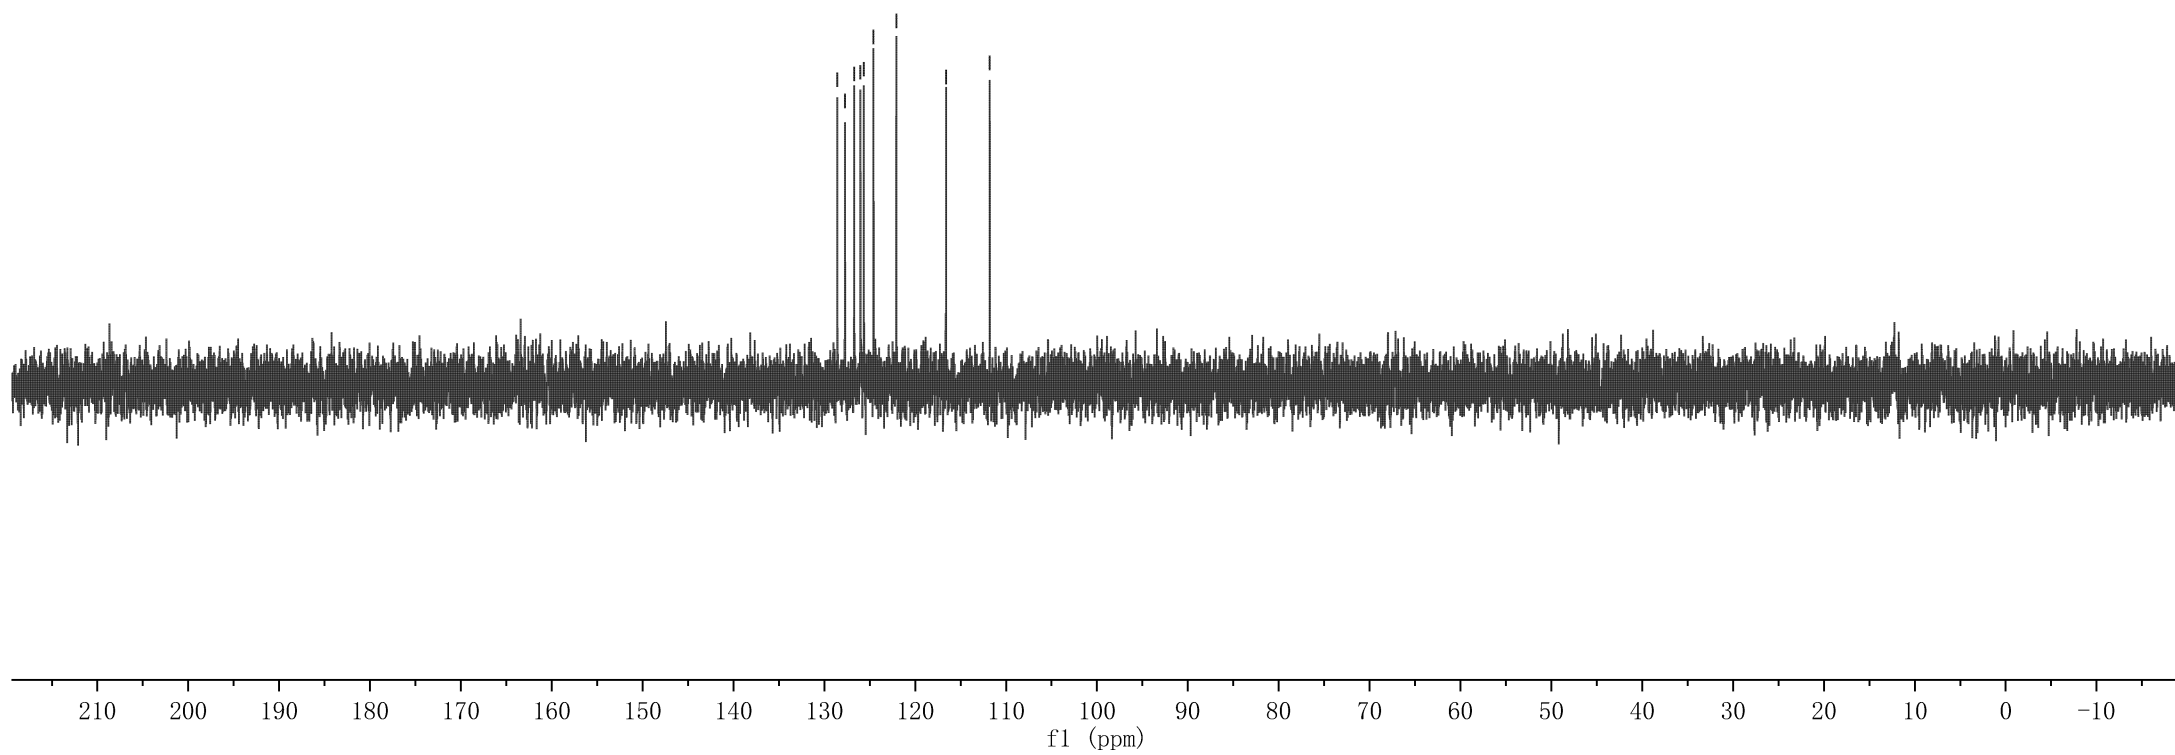

| Parameter                | Value               |
|--------------------------|---------------------|
| 1 Title                  | LJ-1-194-1          |
| 2 Origin                 |                     |
| 3 Solvent                | CDC13               |
| 4 Temperature            | 295.6               |
| 5 Number of Scans        | 16                  |
| 6 Acquisition Time       | 4.0002              |
| 7 Acquisition Date       | 2023-02-16T21:36:17 |
| 8 Spectrometer Frequency | 399.90              |
| 9 Spectral Width         | 8012.0              |

7.386  
7.383  
7.365  
7.332  
7.327  
7.315  
7.296  
7.276  
7.224  
7.206  
7.178  
7.107  
7.088  
7.048  
7.029  
6.525  
6.248  
6.239  
6.223  
6.214

5.350  
5.326

4.694  
4.685  
4.677

4.112

0.000

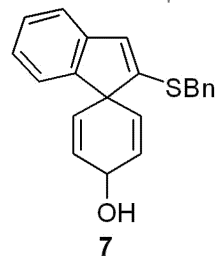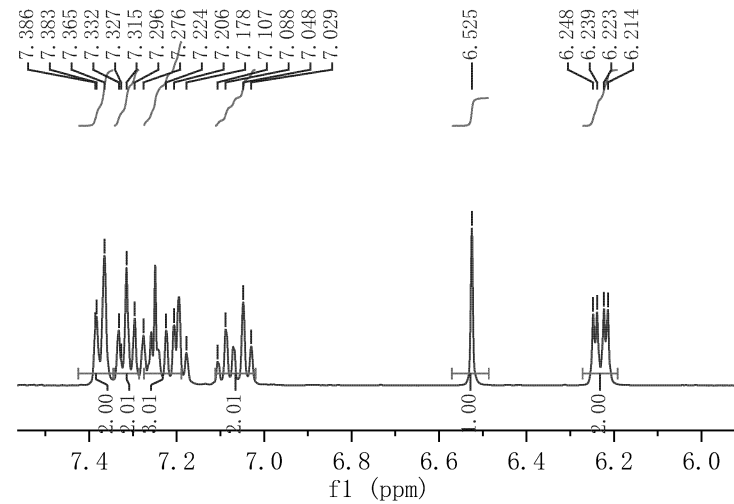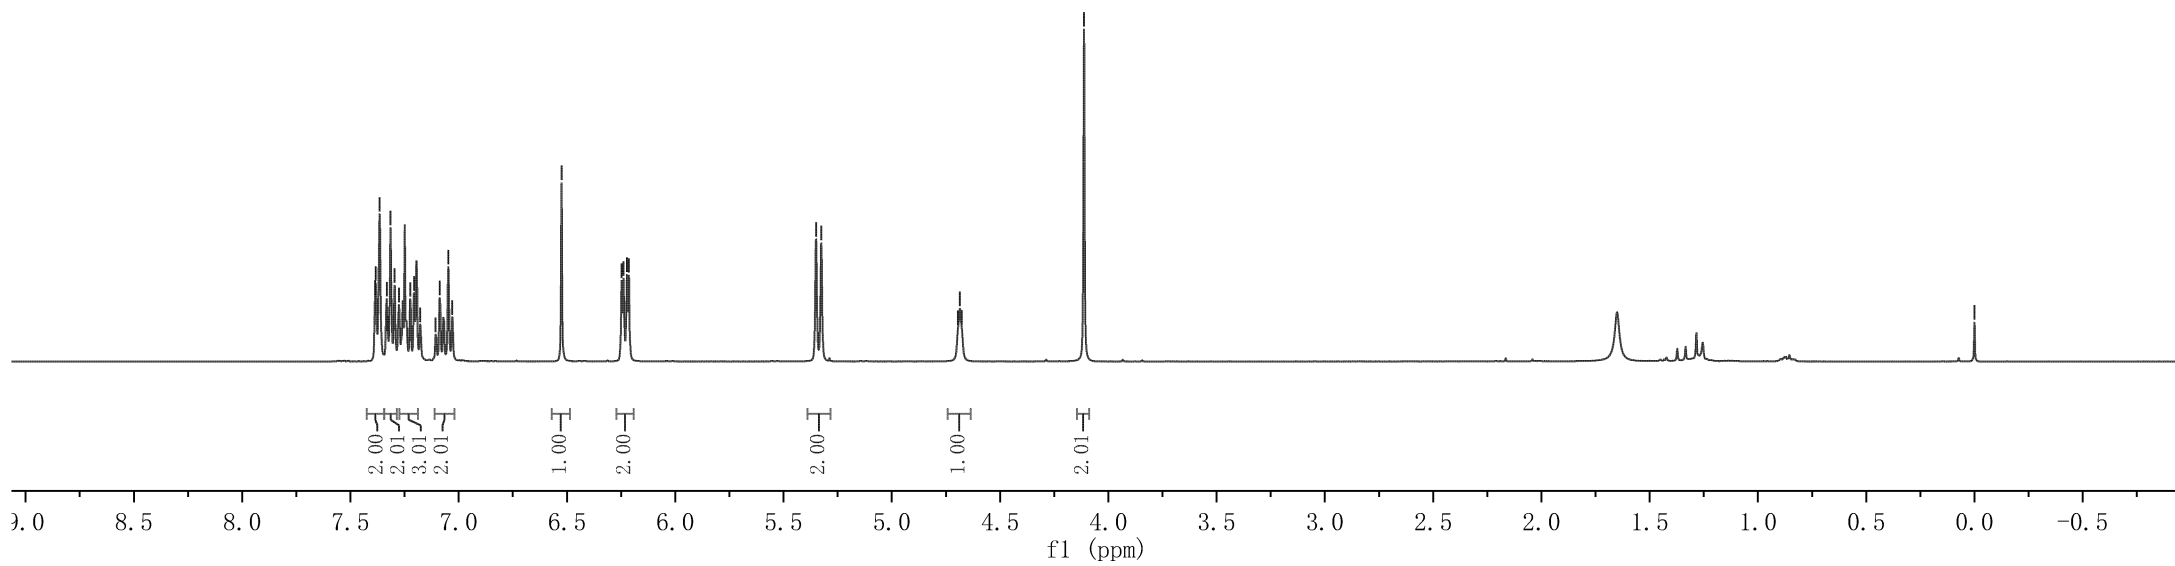

| Parameter                | Value               |
|--------------------------|---------------------|
| 1 Title                  | LJ-1-194-1          |
| 2 Origin                 |                     |
| 3 Solvent                | CDC13               |
| 4 Temperature            | 295.6               |
| 5 Number of Scans        | 160                 |
| 6 Acquisition Time       | 1.0000              |
| 7 Acquisition Date       | 2023-02-16T22:32:18 |
| 8 Spectrometer Frequency | 100.56              |
| 9 Spectral Width         | 26041.0             |

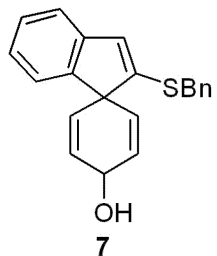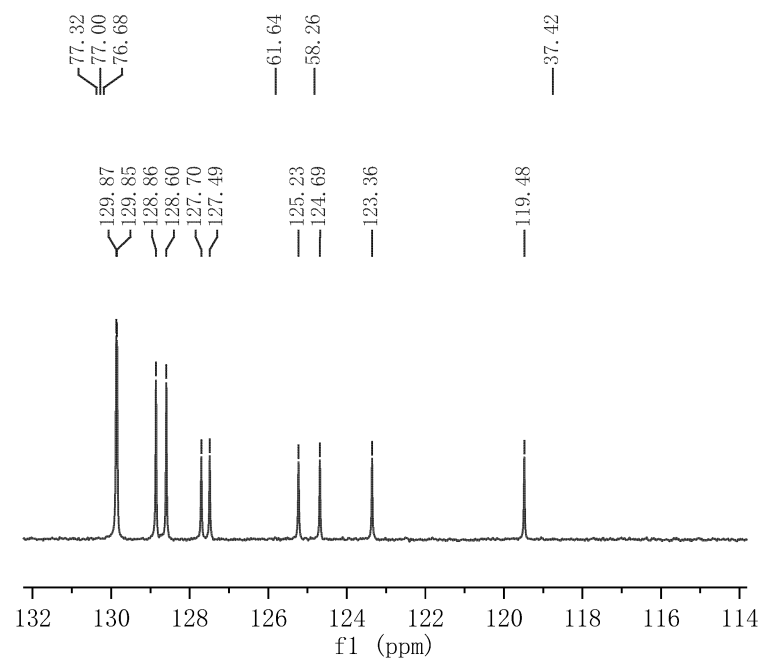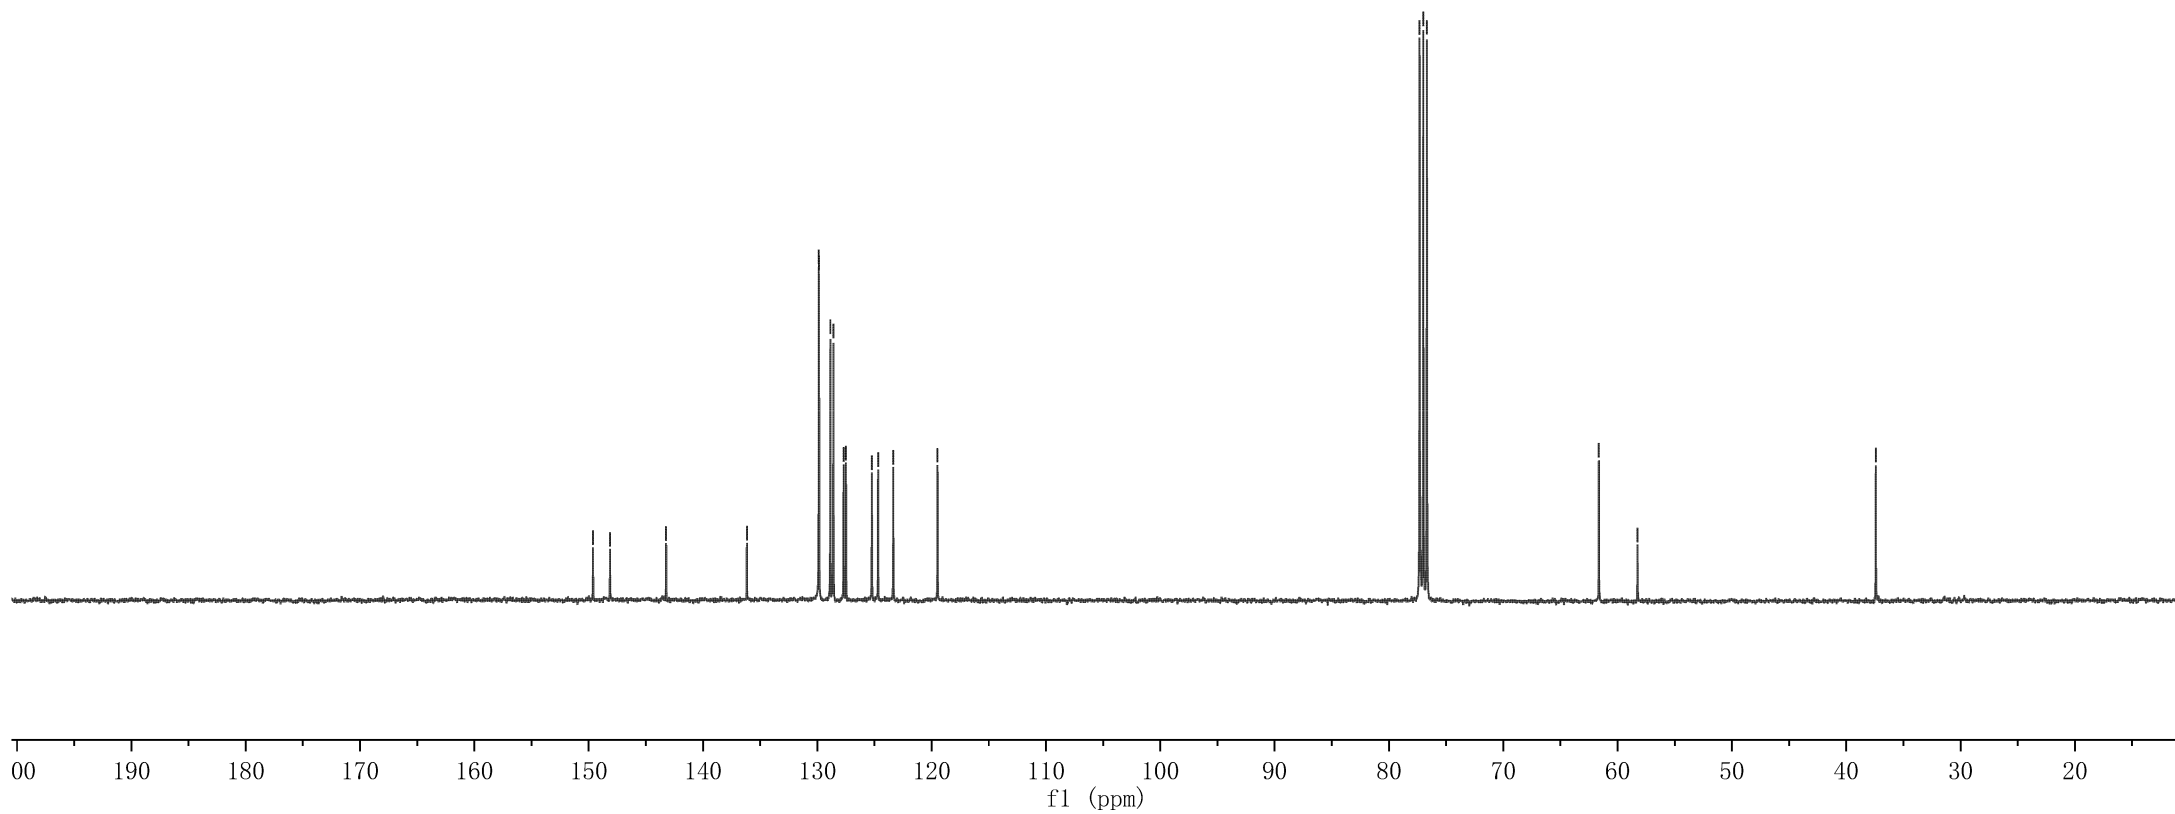

| Parameter                | Value               |
|--------------------------|---------------------|
| 1 Title                  | LJ-1-194-1          |
| 2 Origin                 |                     |
| 3 Solvent                | CDC13               |
| 4 Temperature            | 295.6               |
| 5 Number of Scans        | 160                 |
| 6 Acquisition Time       | 1.0000              |
| 7 Acquisition Date       | 2023-02-16T22:32:18 |
| 8 Spectrometer Frequency | 100.56              |
| 9 Spectral Width         | 26041.0             |

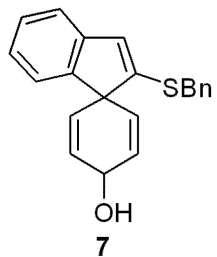

129.86  
129.84  
128.84  
128.58  
127.69  
127.47  
125.27  
124.68  
123.34  
119.47

61.62

37.42

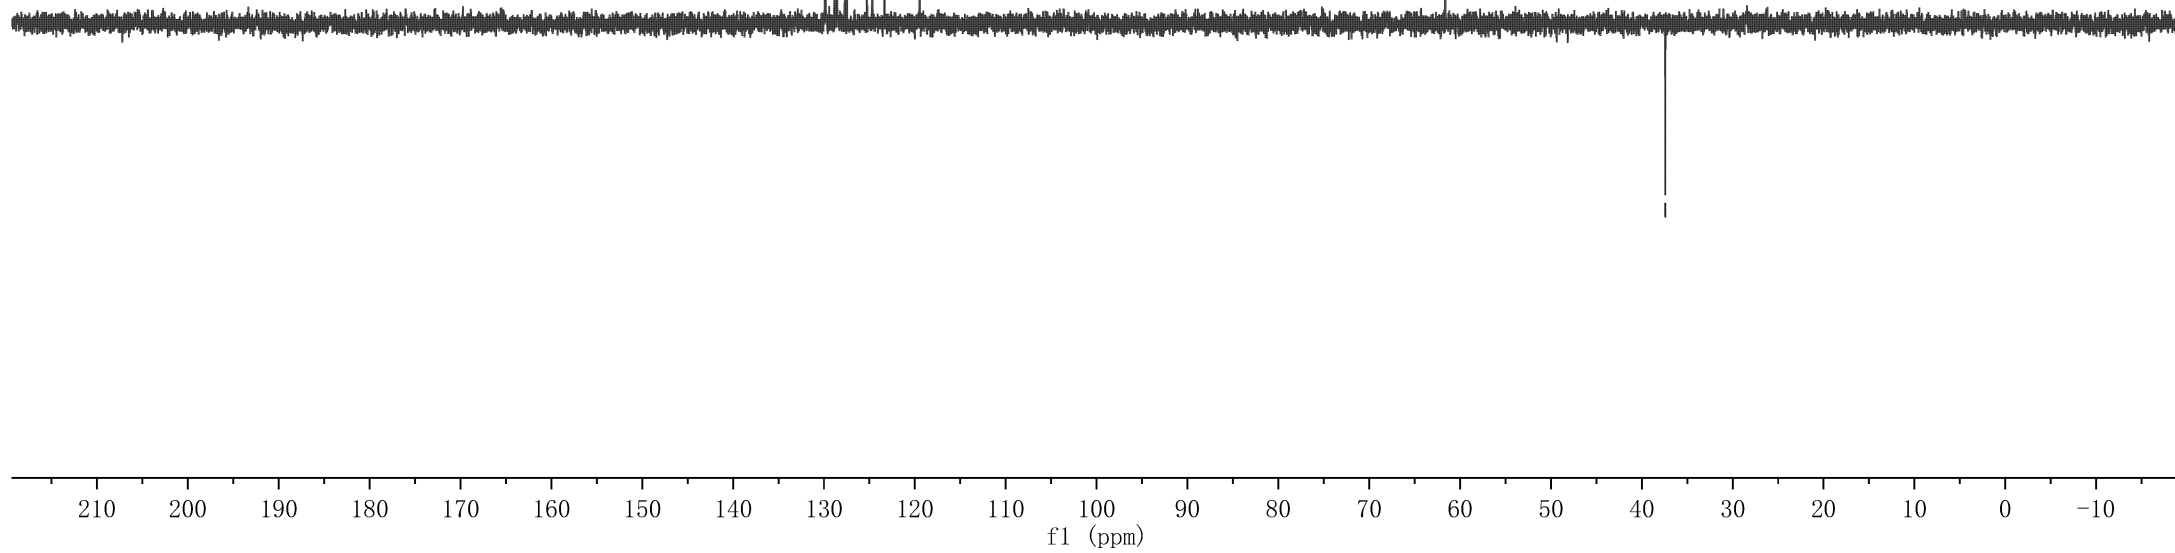

| Parameter                | Value               |
|--------------------------|---------------------|
| 1 Title                  | FXY-11-21           |
| 2 Origin                 |                     |
| 3 Solvent                | CDC13               |
| 4 Temperature            | 295.4               |
| 5 Number of Scans        | 16                  |
| 6 Acquisition Time       | 4.0002              |
| 7 Acquisition Date       | 2023-02-15T21:45:17 |
| 8 Spectrometer Frequency | 399.90              |
| 9 Spectral Width         | 8012.0              |

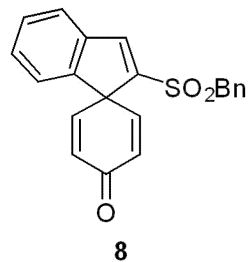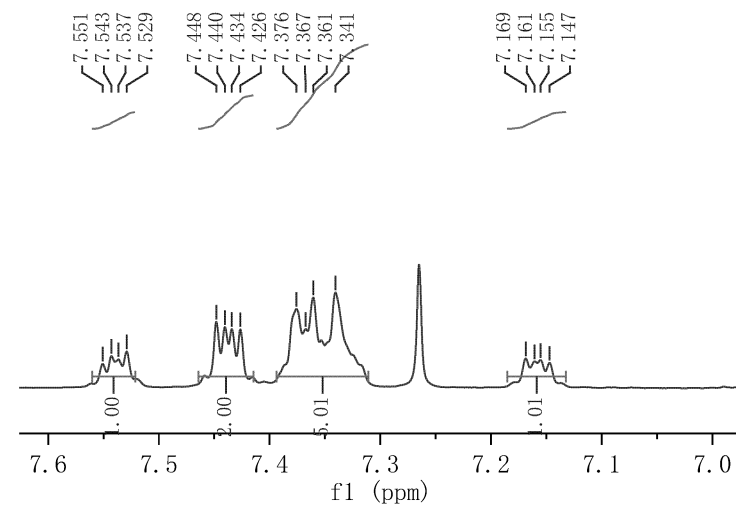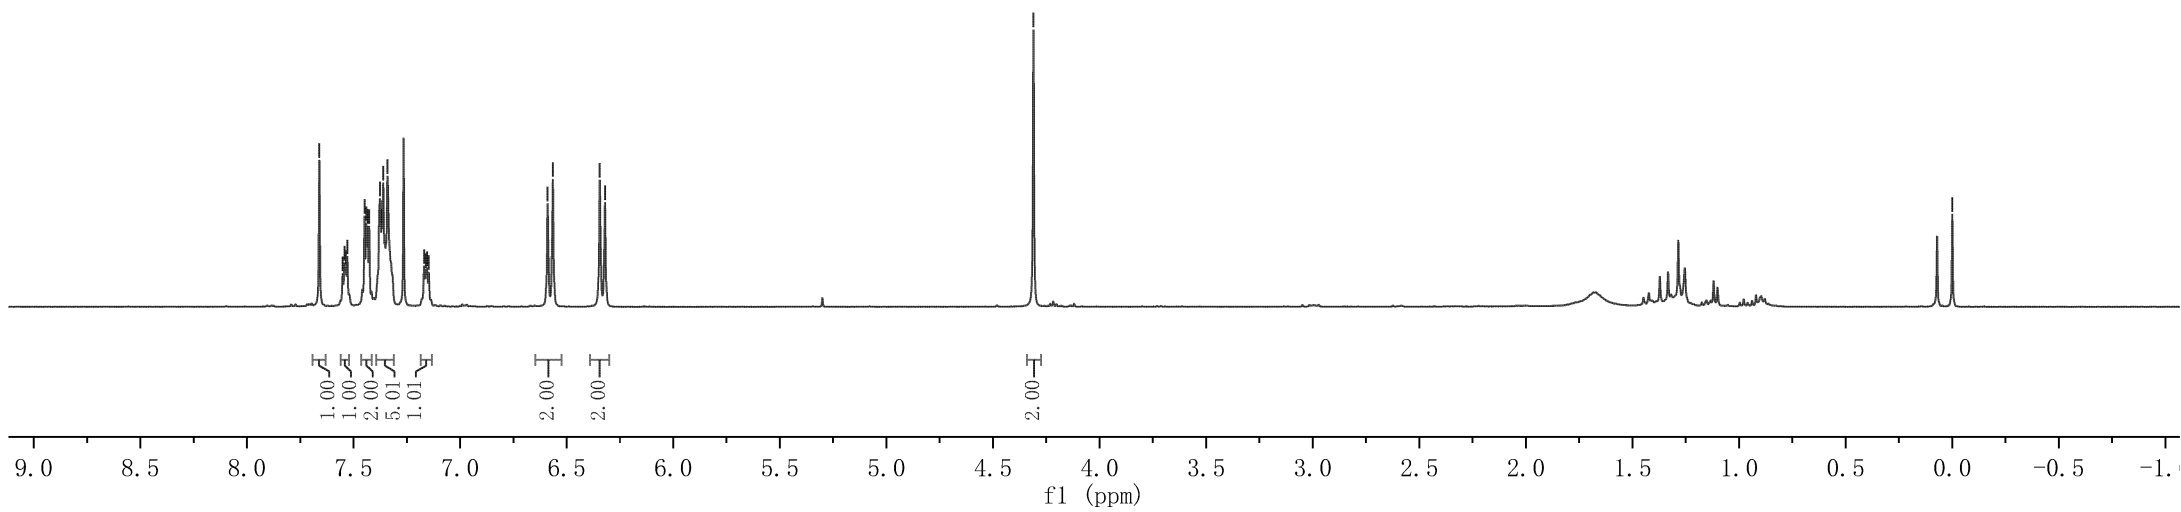

| Parameter                | Value               |
|--------------------------|---------------------|
| 1 Title                  | FXY-11-21           |
| 2 Origin                 |                     |
| 3 Solvent                | CDC13               |
| 4 Temperature            | 295.3               |
| 5 Number of Scans        | 500                 |
| 6 Acquisition Time       | 1.0000              |
| 7 Acquisition Date       | 2023-02-15T22:21:57 |
| 8 Spectrometer Frequency | 100.56              |
| 9 Spectral Width         | 26041.0             |

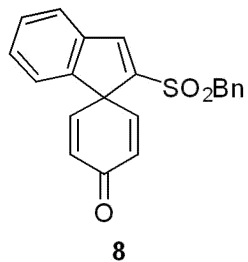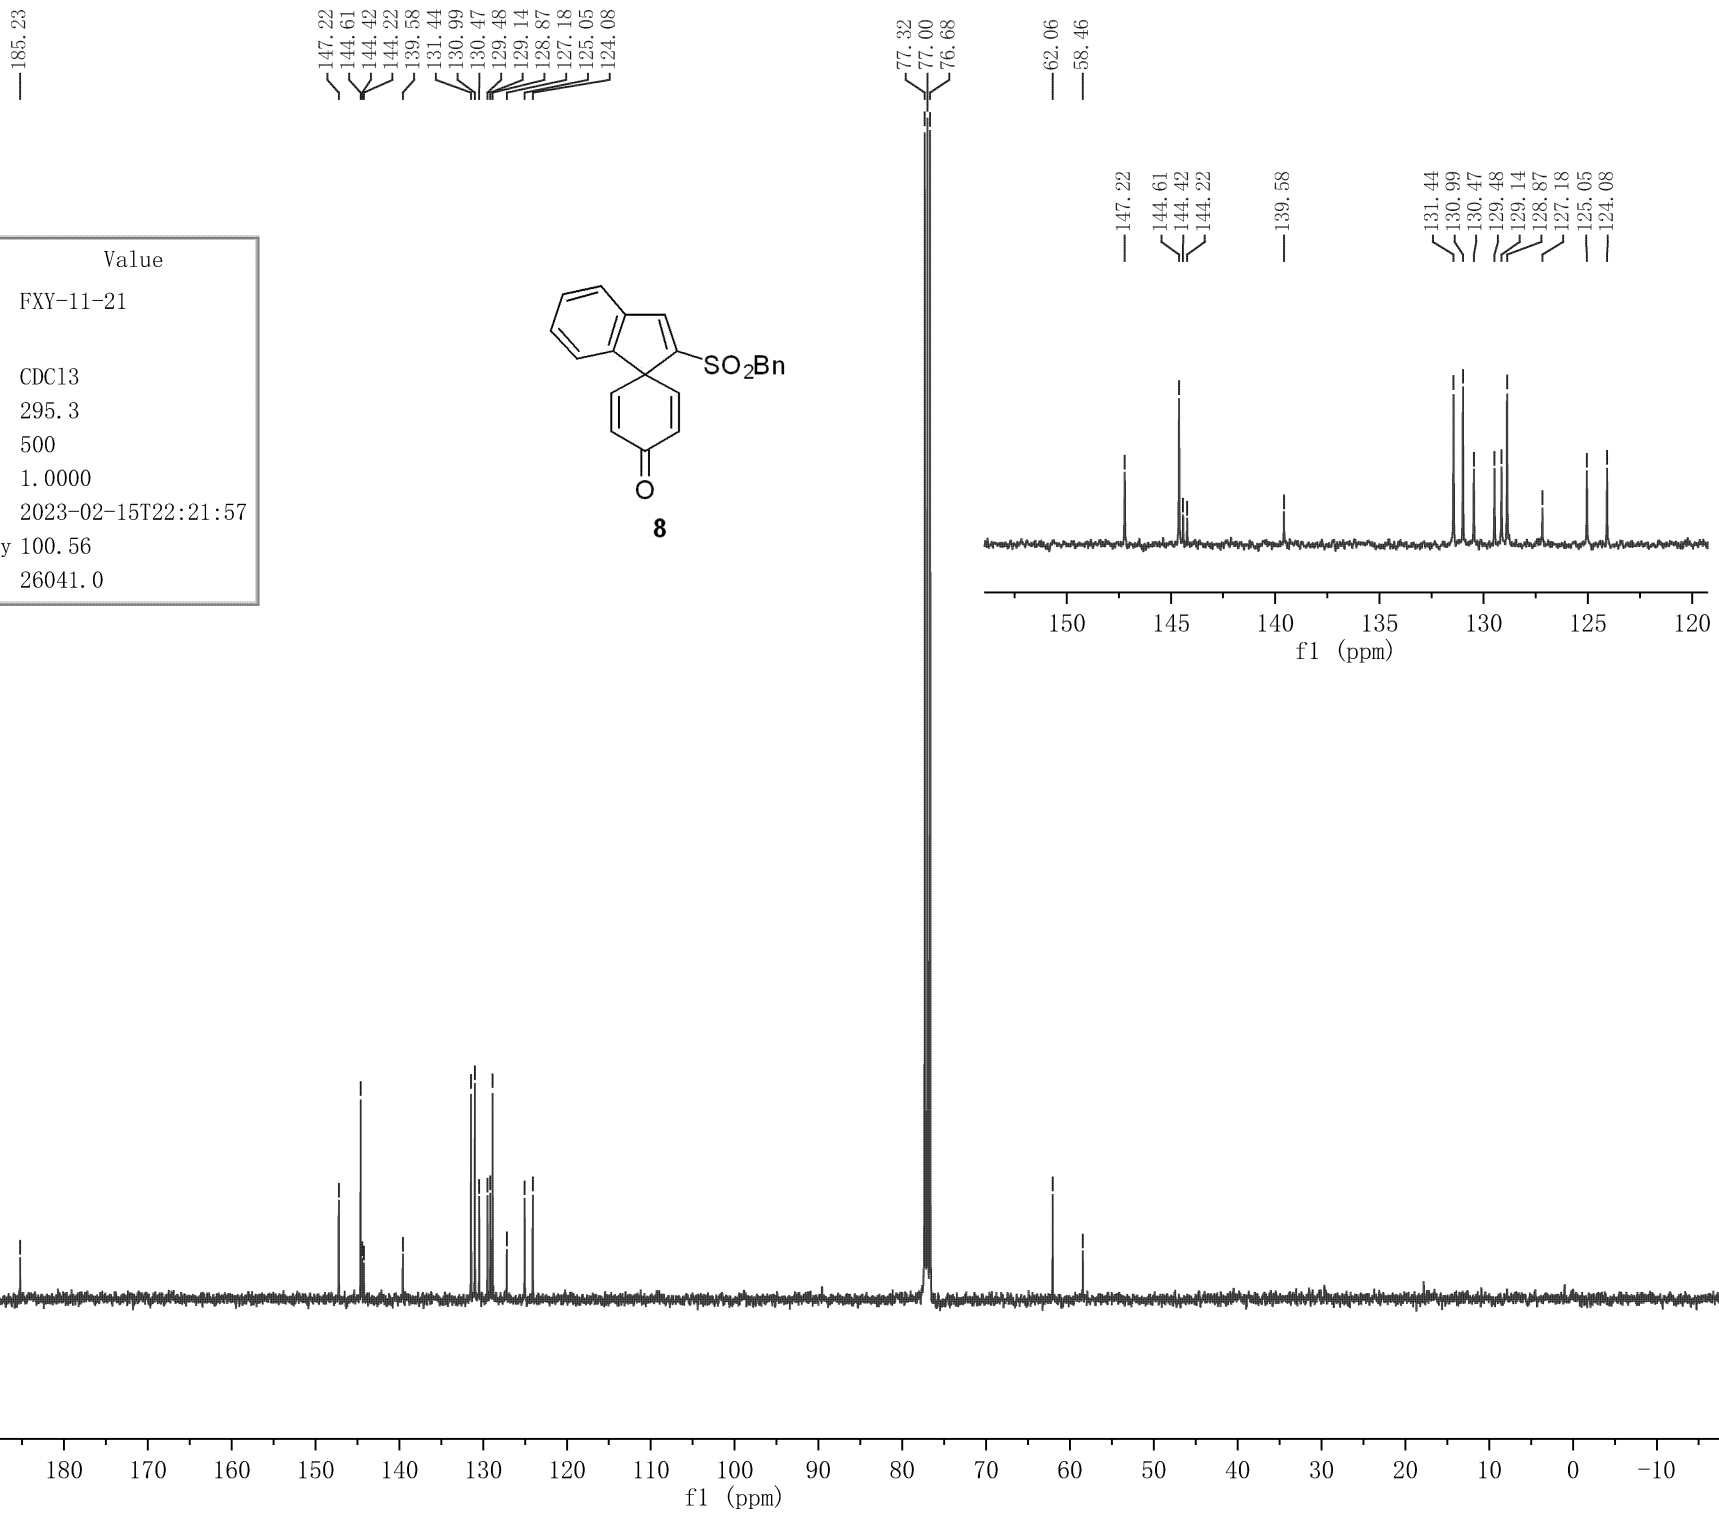

147.27  
144.66  
131.49  
131.04  
130.52  
129.52  
129.19  
128.92  
125.09  
124.12

62.06

| Parameter                | Value               |
|--------------------------|---------------------|
| 1 Title                  | FXY-11-21           |
| 2 Origin                 |                     |
| 3 Solvent                | CDC13               |
| 4 Temperature            | 295.4               |
| 5 Number of Scans        | 150                 |
| 6 Acquisition Time       | 1.0001              |
| 7 Acquisition Date       | 2023-02-15T22:42:35 |
| 8 Spectrometer Frequency | 100.56              |
| 9 Spectral Width         | 18028.0             |

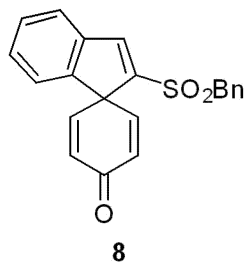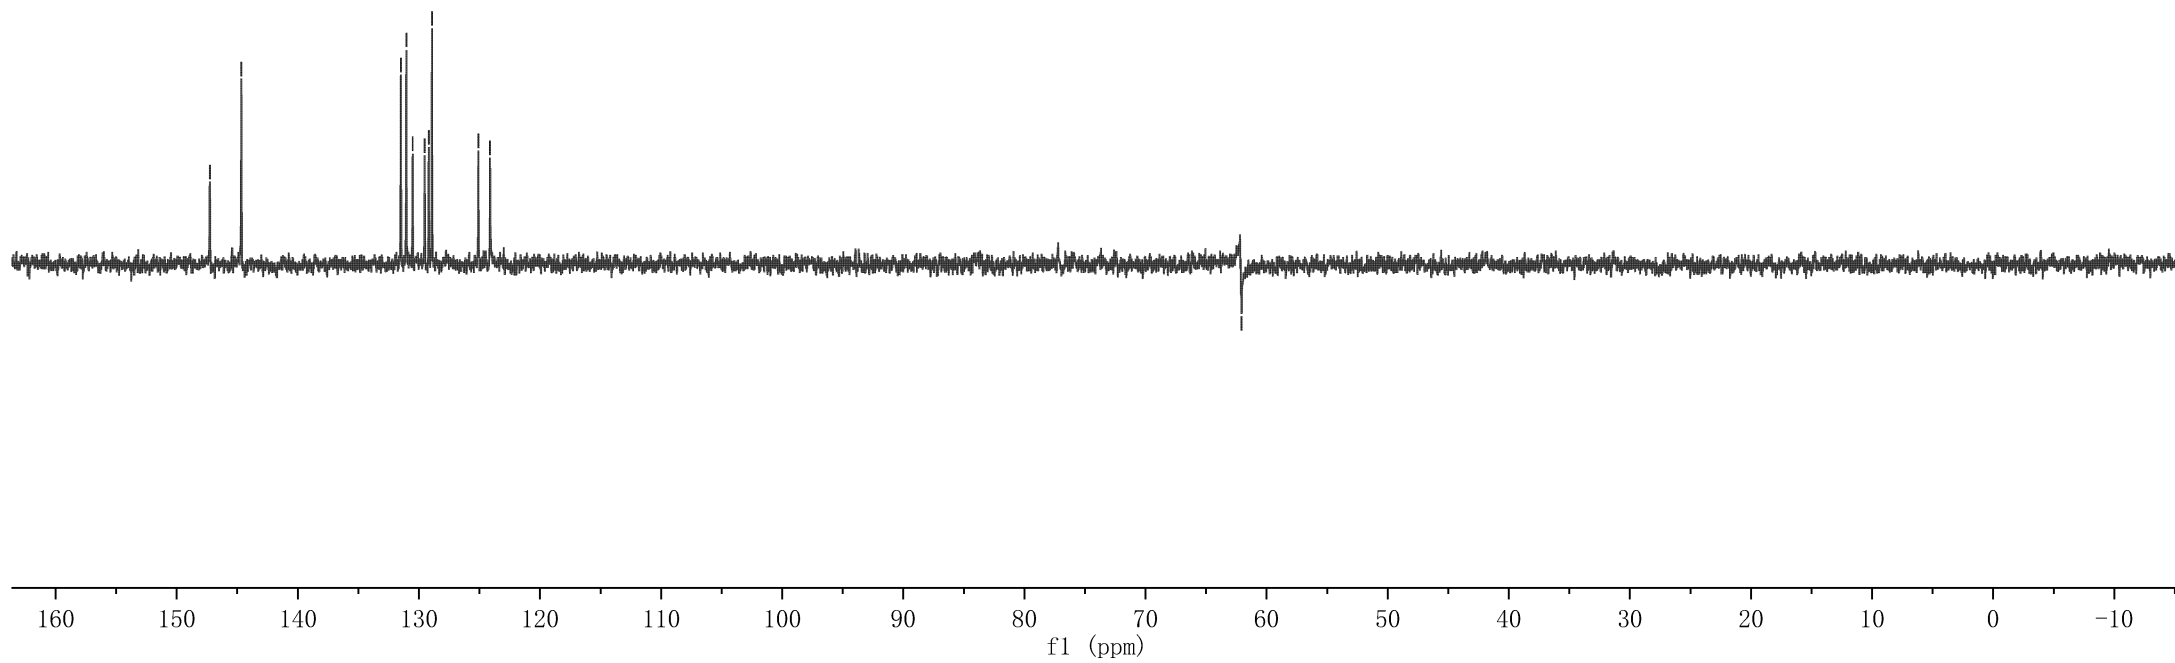



| Parameter                | Value               |
|--------------------------|---------------------|
| 1 Title                  | 9-H                 |
| 2 Origin                 |                     |
| 3 Solvent                | CDC13               |
| 4 Temperature            | 295.1               |
| 5 Number of Scans        | 16                  |
| 6 Acquisition Time       | 4.0002              |
| 7 Acquisition Date       | 2023-02-16T00:44:59 |
| 8 Spectrometer Frequency | 399.90              |
| 9 Spectral Width         | 8012.0              |

7.560  
7.503  
7.484  
7.435  
7.416  
7.397  
7.354  
7.343  
7.340  
7.325  
7.232  
7.228  
7.224  
7.216  
7.162  
7.143  
6.620  
6.596  
6.526  
6.502  
6.480  
6.474  
6.267  
6.260  
6.242  
6.235

4.214  
4.182  
4.052  
4.020

0.000

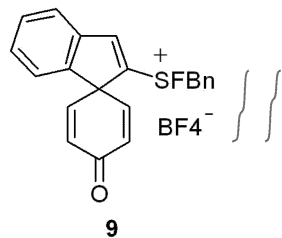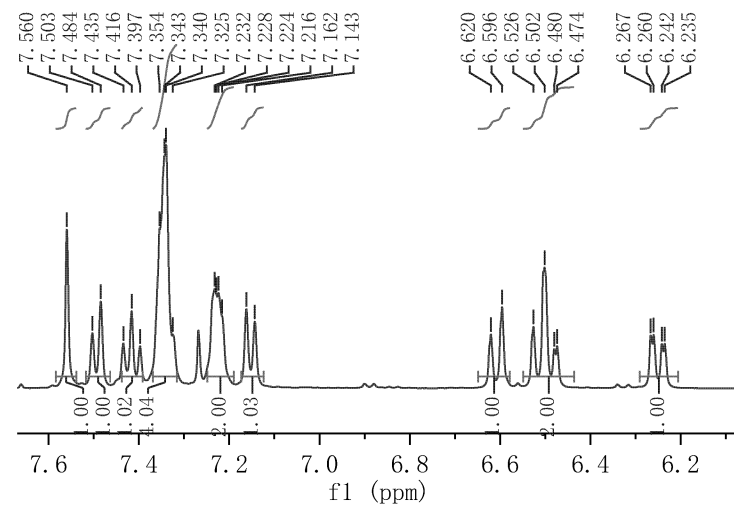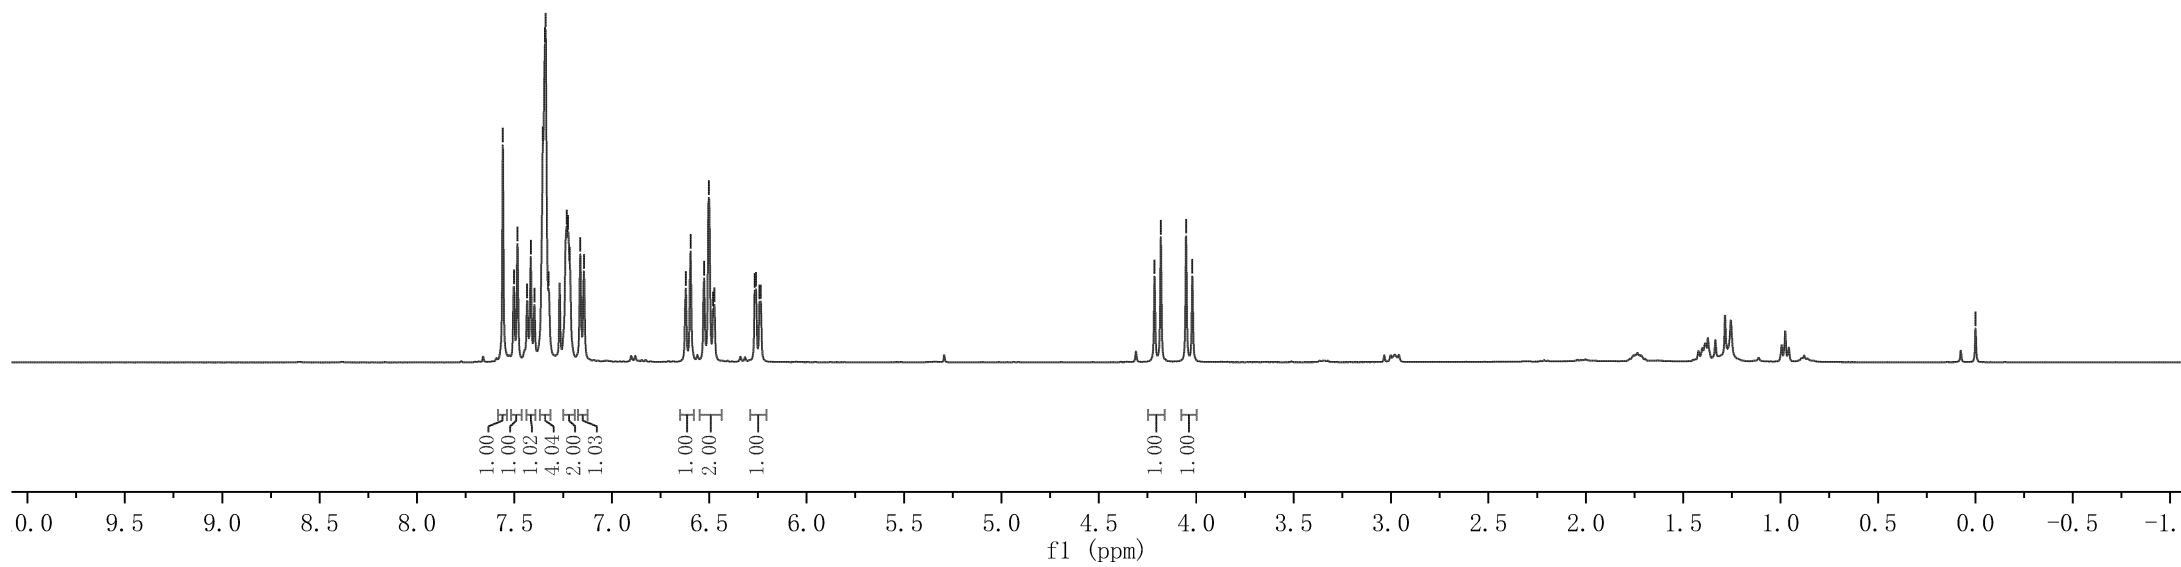

| Parameter                | Value               |
|--------------------------|---------------------|
| 1 Title                  | 9-c                 |
| 2 Origin                 |                     |
| 3 Solvent                | CDC13               |
| 4 Temperature            | 295.2               |
| 5 Number of Scans        | 102                 |
| 6 Acquisition Time       | 1.0000              |
| 7 Acquisition Date       | 2023-02-16T01:21:38 |
| 8 Spectrometer Frequency | 100.56              |
| 9 Spectral Width         | 26041.0             |

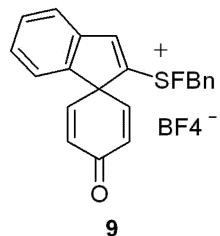

185.20

150.16  
146.23  
145.06  
143.66  
141.22  
139.51  
131.58  
131.29  
130.44  
129.26  
129.09  
128.75  
128.61  
128.56  
123.64  
123.49

77.32  
77.00  
76.68

61.69  
58.55

131.58  
131.29

130.44

129.26  
129.09  
128.75  
128.61  
128.56

123.64  
123.49

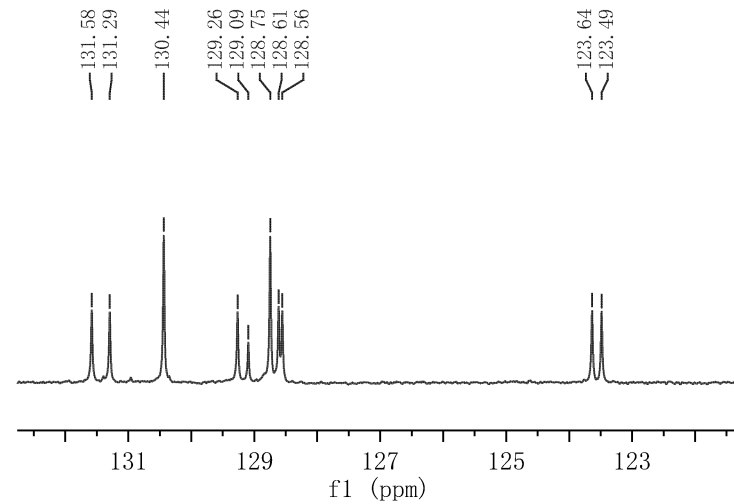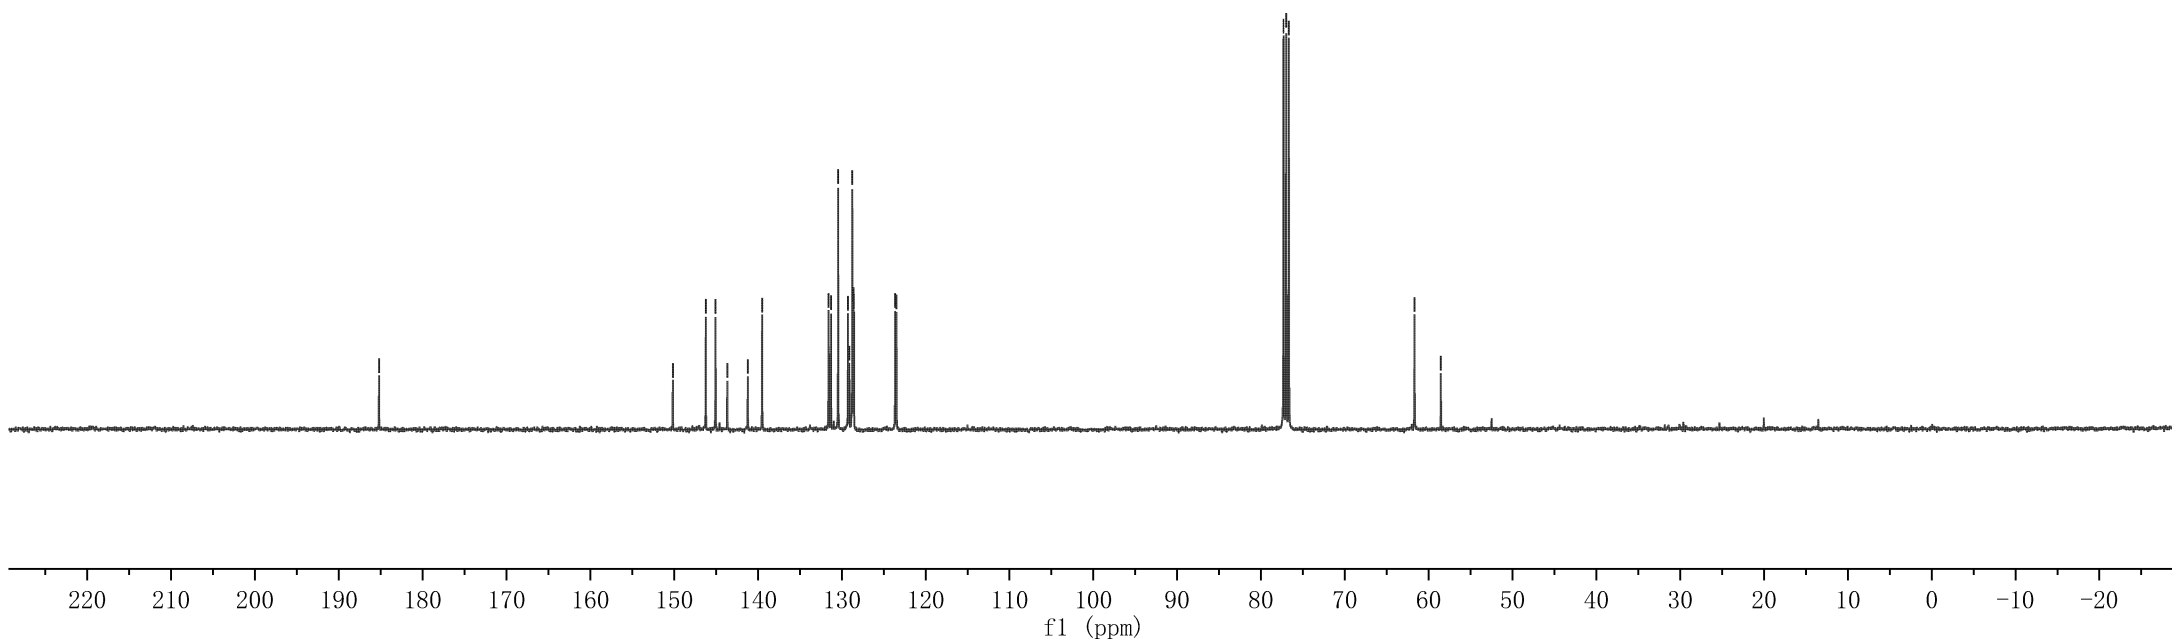

146.18  
145.02  
139.45  
131.28  
130.40  
129.23  
128.72  
128.68  
128.01  
123.44

61.69

| Parameter                | Value               |
|--------------------------|---------------------|
| 1 Title                  | 9-dept              |
| 2 Origin                 |                     |
| 3 Solvent                | CDC13               |
| 4 Temperature            | 294.9               |
| 5 Number of Scans        | 16                  |
| 6 Acquisition Time       | 1.0000              |
| 7 Acquisition Date       | 2023-02-16T01:47:31 |
| 8 Spectrometer Frequency | 376.28              |
| 9 Spectral Width         | 96153.0             |

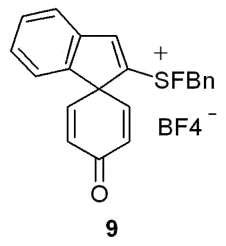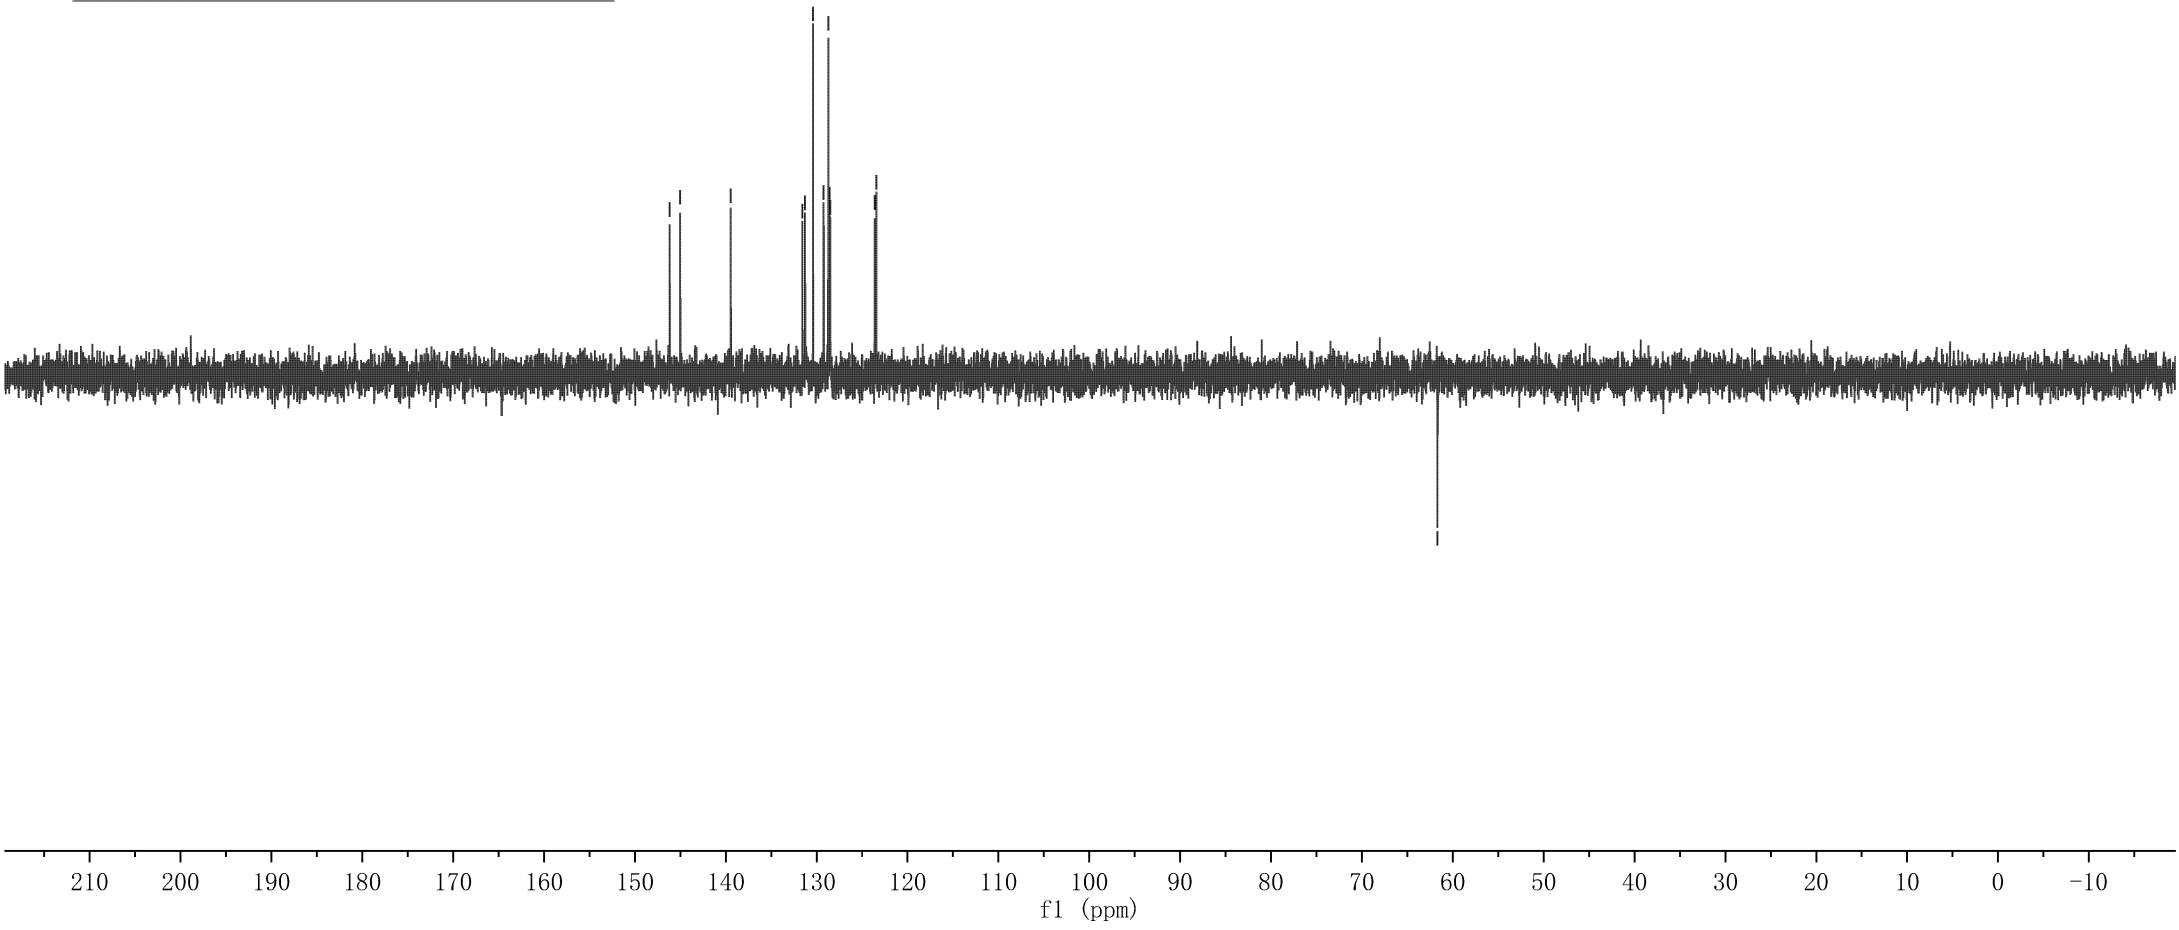

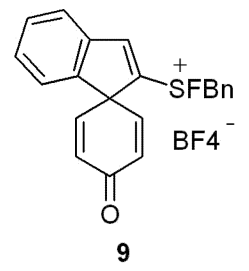

| Parameter                | Value               |
|--------------------------|---------------------|
| 1 Title                  | 9-F                 |
| 2 Origin                 |                     |
| 3 Solvent                | CDC13               |
| 4 Temperature            | 294.9               |
| 5 Number of Scans        | 16                  |
| 6 Acquisition Time       | 1.0000              |
| 7 Acquisition Date       | 2023-02-16T01:47:31 |
| 8 Spectrometer Frequency | 376.28              |
| 9 Spectral Width         | 96153.0             |

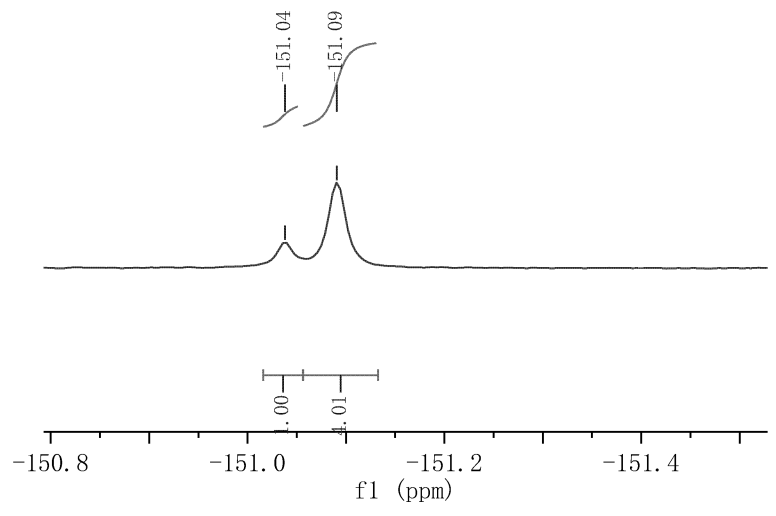

-151.04  
-151.09

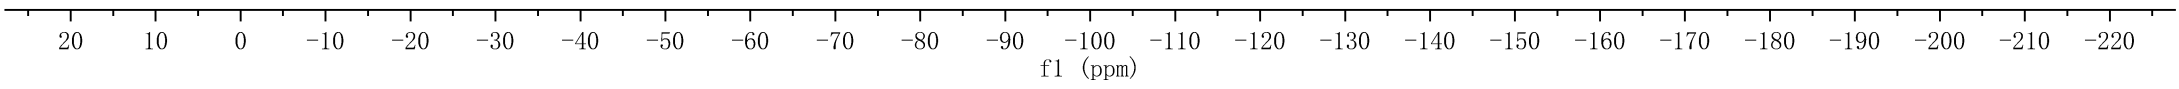

7.496  
7.477  
7.418  
7.400  
7.356  
7.353  
7.336  
7.317  
7.296  
7.278  
7.269  
7.253  
7.234  
7.134  
7.115  
7.112  
7.093  
6.429

4.178

2.874  
2.819  
2.771  
2.717  
2.305  
2.279  
2.257  
2.230  
1.886  
1.872  
1.837  
1.824

| Parameter                | Value               |
|--------------------------|---------------------|
| 1 Title                  | FXV-11-40           |
| 2 Origin                 |                     |
| 3 Solvent                | CDCl3               |
| 4 Temperature            | 297.1               |
| 5 Number of Scans        | 16                  |
| 6 Acquisition Time       | 4.0002              |
| 7 Acquisition Date       | 2023-03-02T02:46:29 |
| 8 Spectrometer Frequency | 399.90              |
| 9 Spectral Width         | 8012.0              |

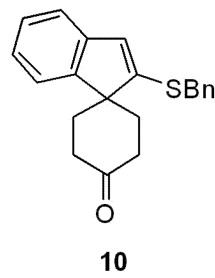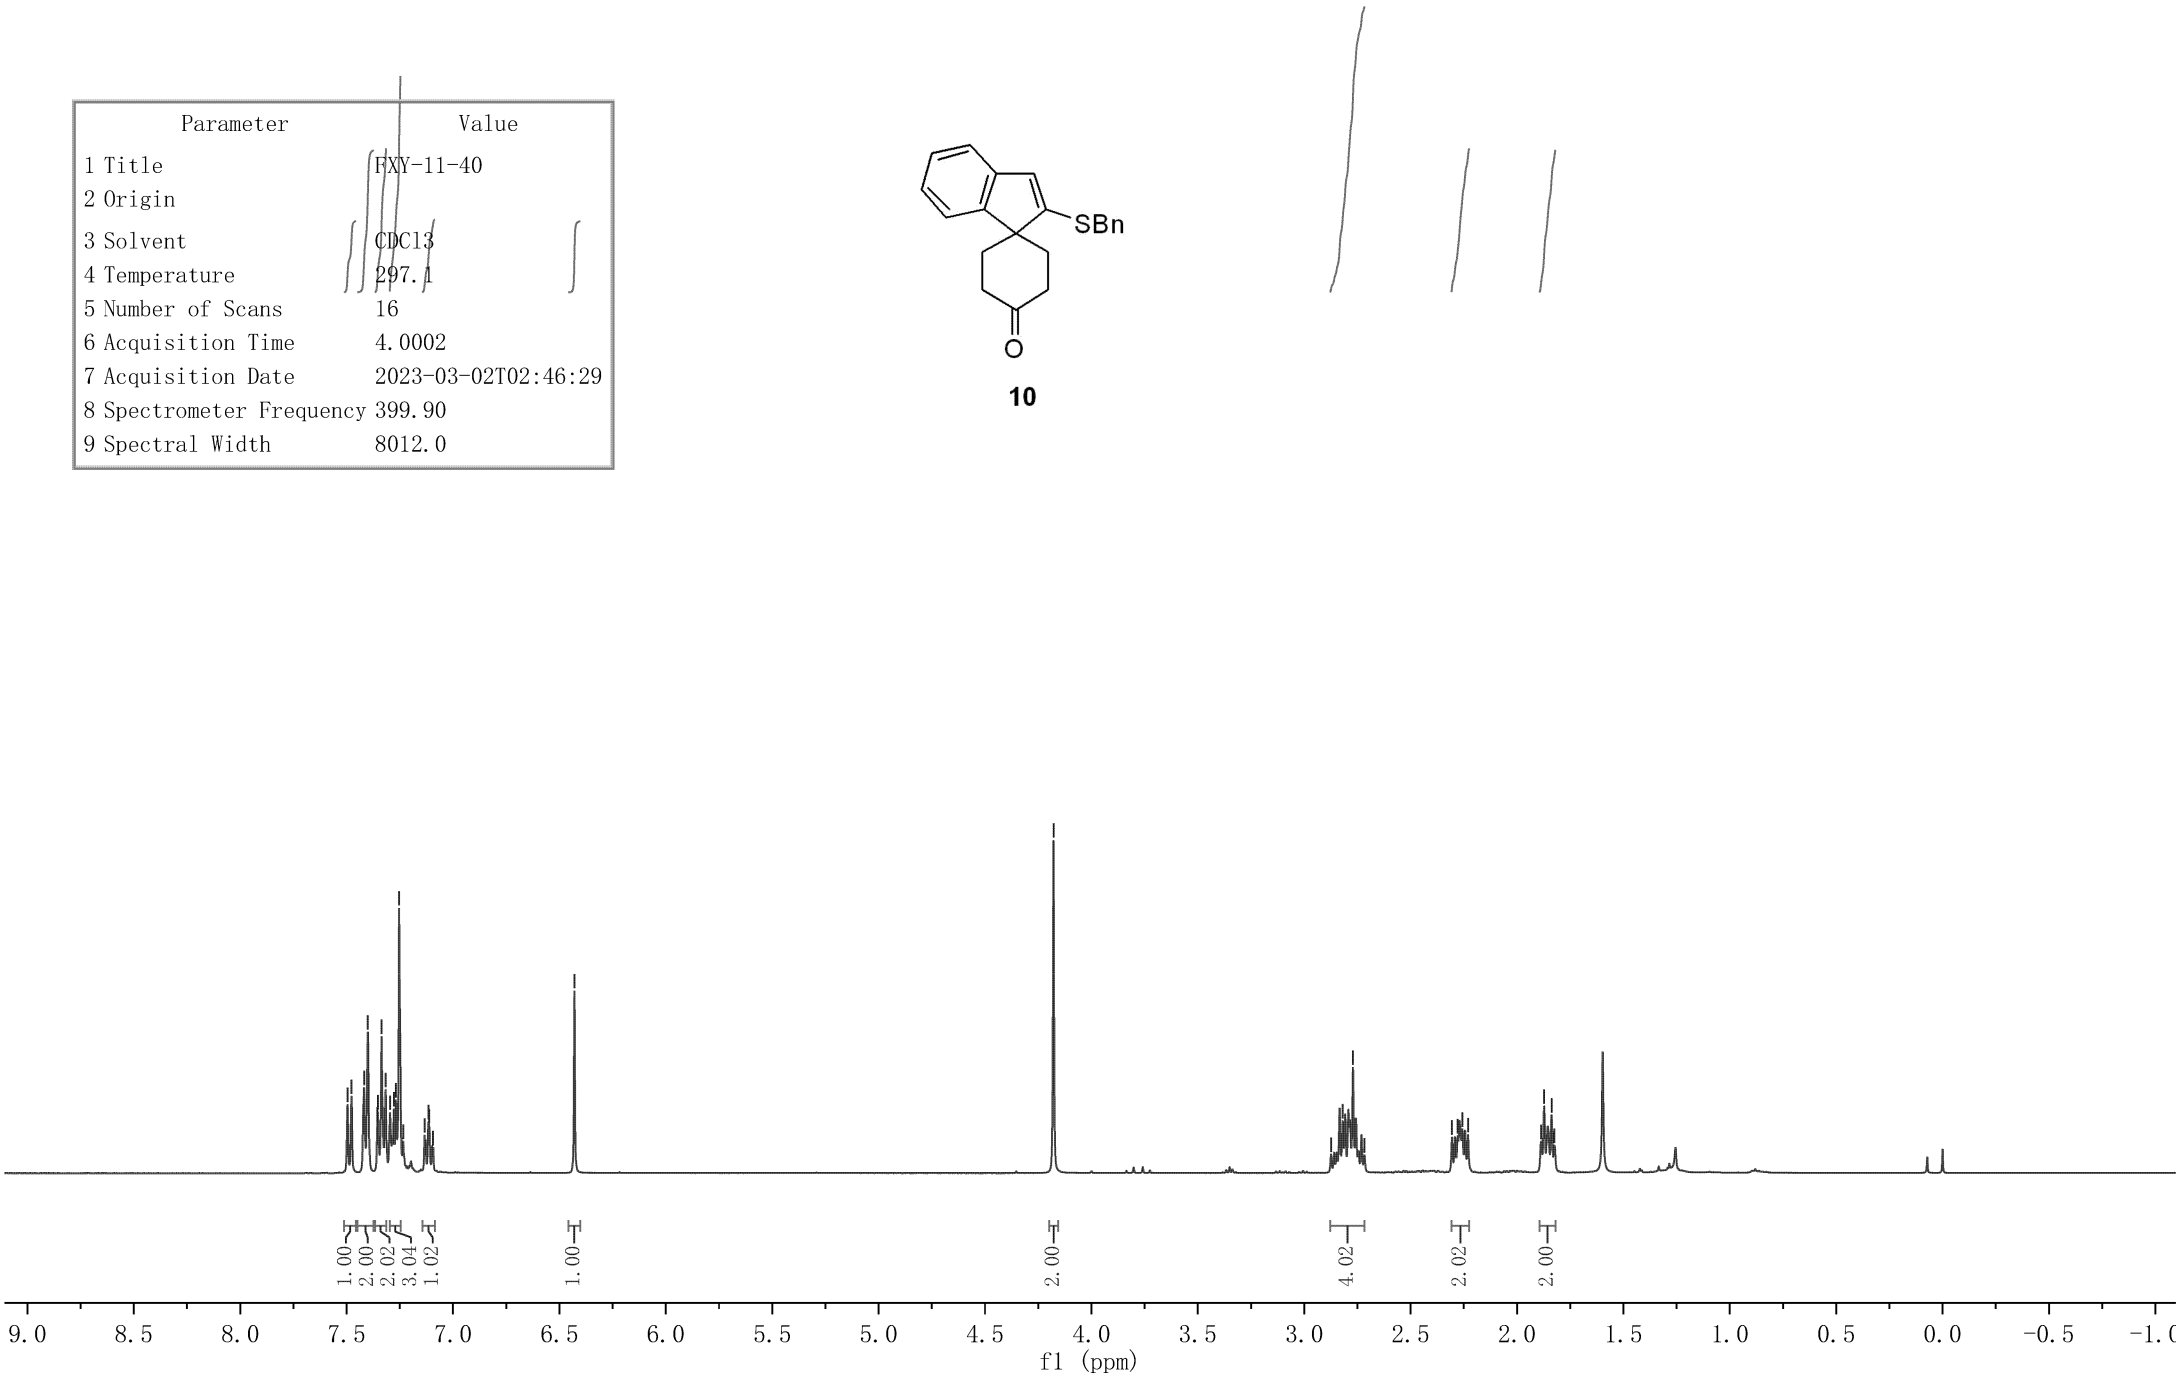

| Parameter                | Value               |
|--------------------------|---------------------|
| 1 Title                  | FXY-11-40           |
| 2 Origin                 |                     |
| 3 Solvent                | CDC13               |
| 4 Temperature            | 297.1               |
| 5 Number of Scans        | 500                 |
| 6 Acquisition Time       | 1.0000              |
| 7 Acquisition Date       | 2023-03-02T03:55:37 |
| 8 Spectrometer Frequency | 100.56              |
| 9 Spectral Width         | 26041.0             |

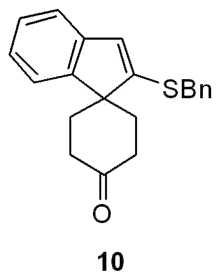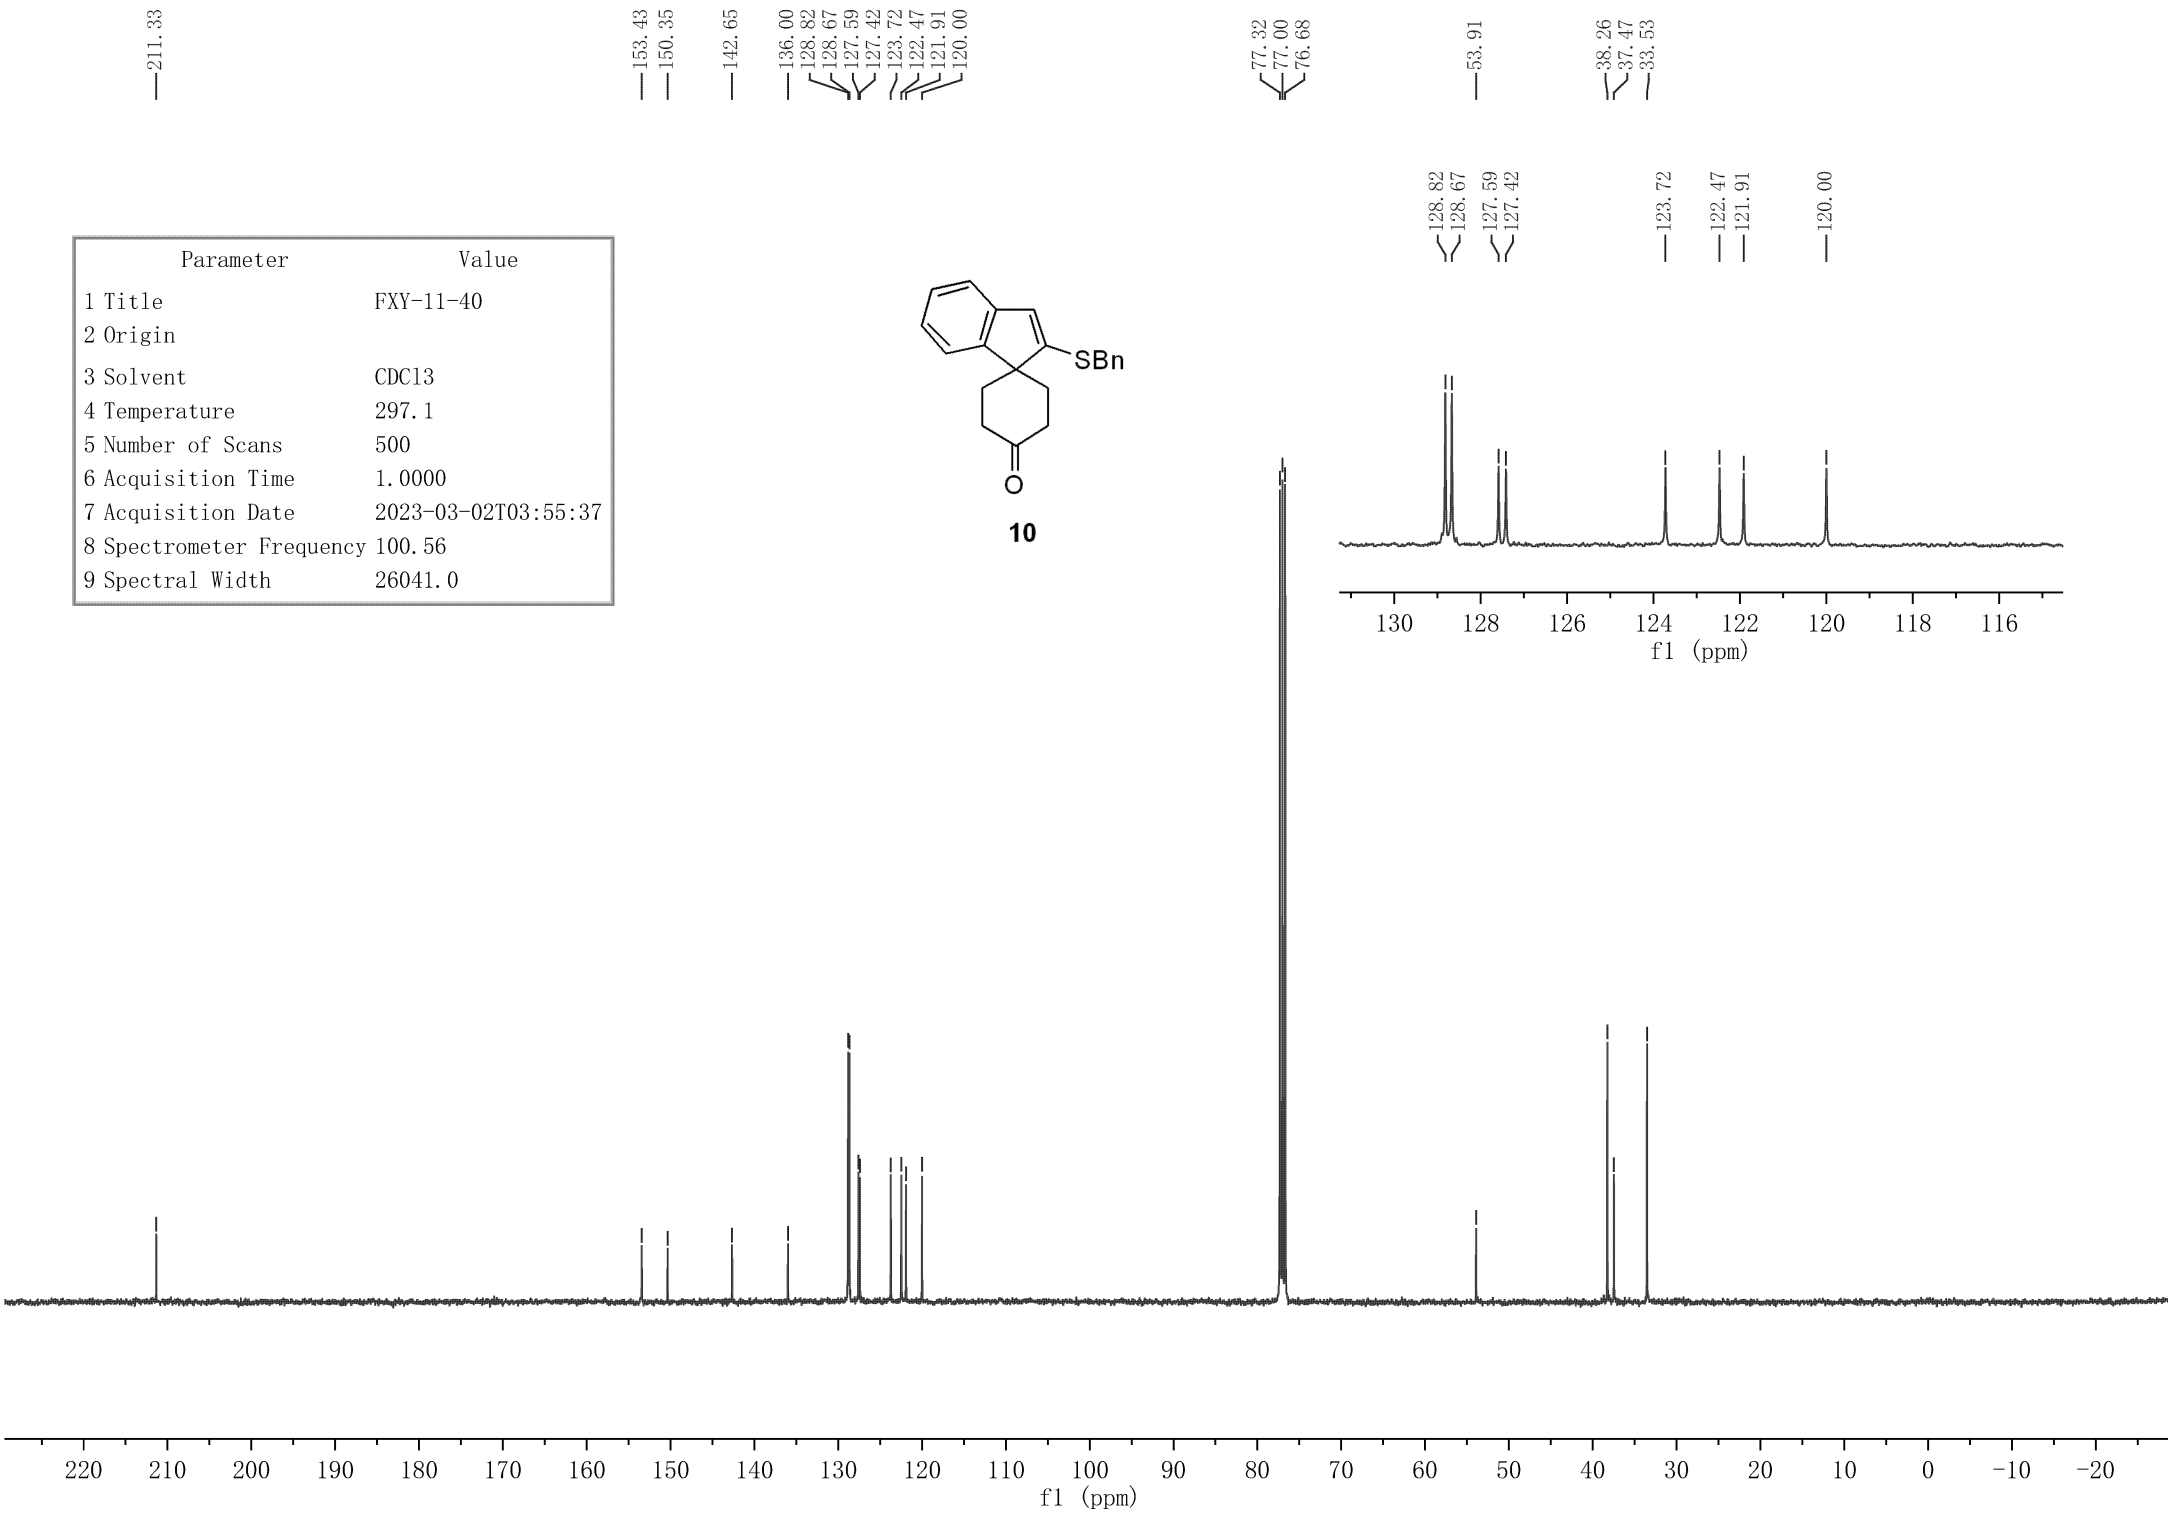

| Parameter                | Value               |
|--------------------------|---------------------|
| 1 Title                  | FXY-11-40           |
| 2 Origin                 |                     |
| 3 Solvent                | CDC13               |
| 4 Temperature            | 297.1               |
| 5 Number of Scans        | 200                 |
| 6 Acquisition Time       | 1.0000              |
| 7 Acquisition Date       | 2023-03-02T03:55:37 |
| 8 Spectrometer Frequency | 100.56              |
| 9 Spectral Width         | 26041.0             |



128.83  
128.68  
127.59  
127.42  
123.75  
122.47  
121.97  
120.01

38.27  
37.50  
33.53

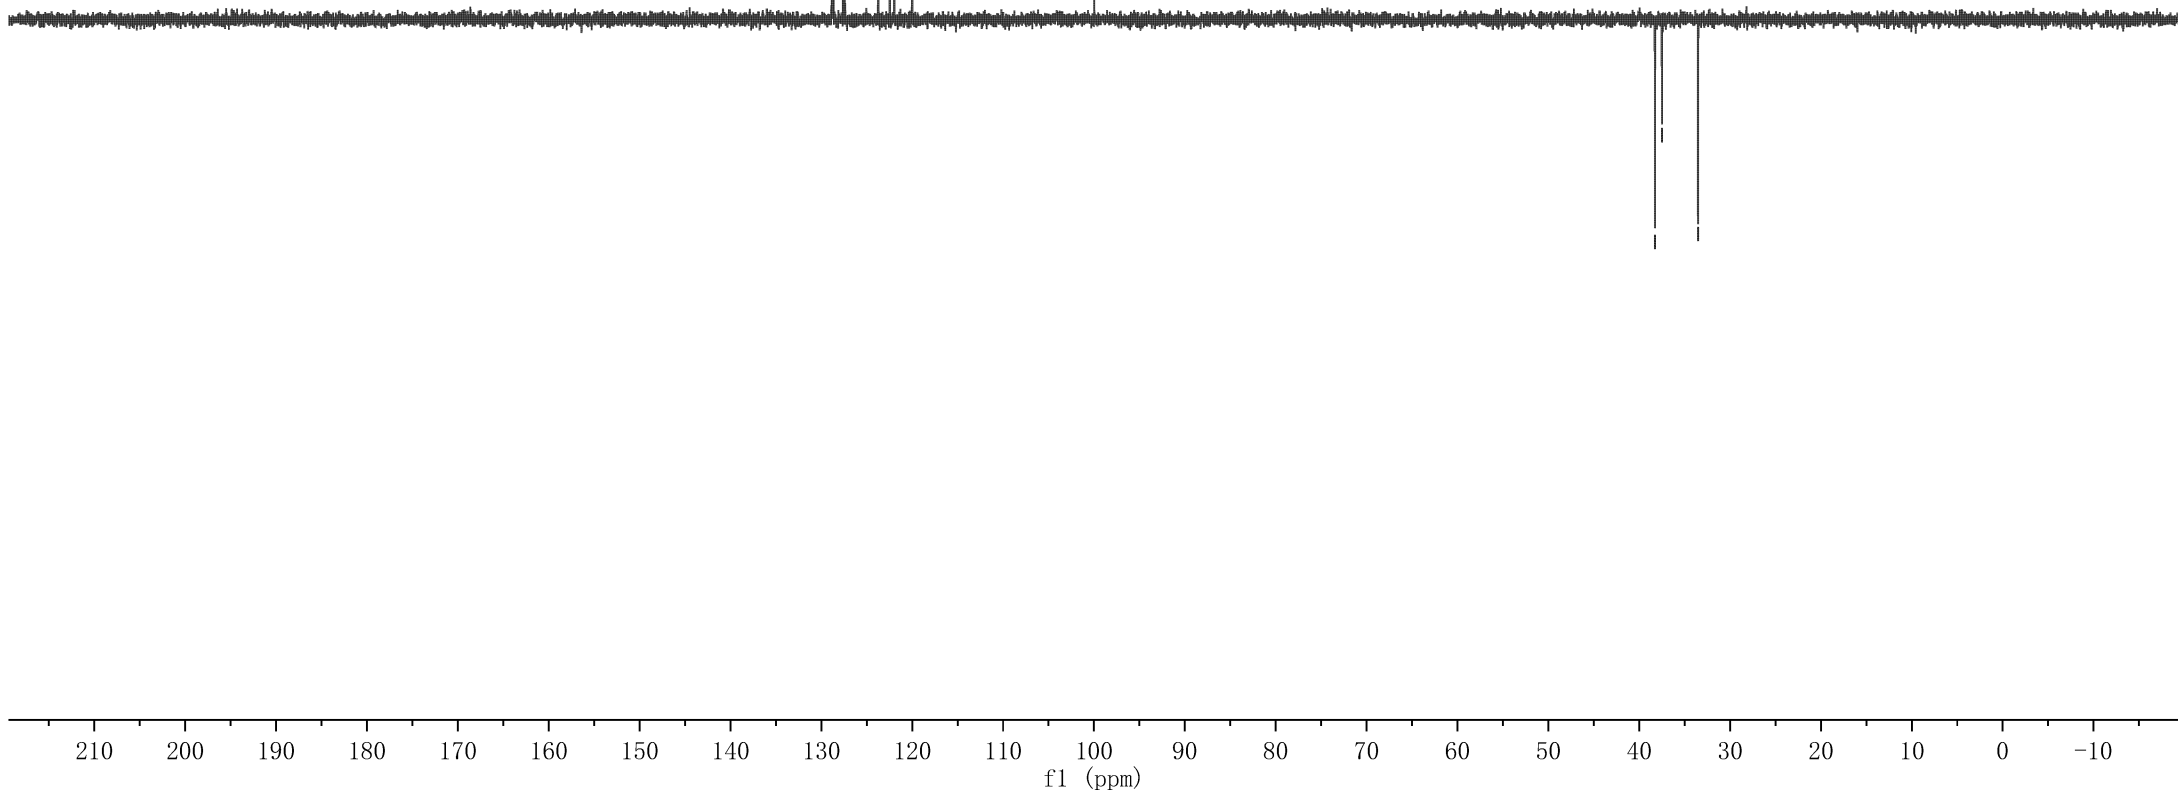

Supplement: d3qo00489a1.pdf [file d3qo00489a1.pdf]
